# Supplementary material for: Single-cell profiling of human subventricular zone progenitors identifies SFRP1 as a target to re-activate progenitors
Source: Nat Commun. 2022 Feb 24;13:1036. doi: 10.1038/s41467-022-28626-9 (PMC8873234; doi:10.1038/s41467-022-28626-9)
Supplement: Supplementary file 3 — Supplementary Data 1 [file 41467_2022_28626_MOESM3_ESM.xlsx]

## Sheet: Sheet1
NBB number	Sex	Age (yrs)	Diagnosis	Thal_phase	Braak NFT	CERAD	CAA	ARTAG	PMD (h:min)	pH CSF	Brain weight (gr)
2018-112	f	95	Cntr	A1	B2	C0	Type 2 stage 1	Yes	04:20:00	6.59	1169
2018-119	f	96	Cntr	A2	B2	C1	Type 1 stage 1	No	08:30:00	6.70	1110
2018-120	m	72	Cntr	A3	B2	C2	n.d.	Yes	06:55:00	6.81	1280
