# Supplementary material for: Single-cell profiling of human subventricular zone progenitors identifies SFRP1 as a target to re-activate progenitors
Source: Nat Commun. 2022 Feb 24;13:1036. doi: 10.1038/s41467-022-28626-9 (PMC8873234; doi:10.1038/s41467-022-28626-9)
Supplement: Supplementary file 4 — Supplementary Data 2 [file 41467_2022_28626_MOESM4_ESM.xlsx]

## Sheet: Progenitor 2
row.names	p_val	avg_logFC	pct.1	pct.2	p_val_adj
APOD	2.26454e-39	0.960019	0.907	0.353	5.1156e-35
CERCAM	4.25656e-37	0.999941	0.891	0.357	9.61557e-33
CRYAB	7.46748e-36	0.829764	0.984	0.391	1.6869e-31
CNP	1.46717e-33	0.810542	0.953	0.372	3.31433e-29
CLDND1	2.1606e-33	0.81044	0.99	0.535	4.8808e-29
PLP1	4.45063e-33	0.88174	0.995	0.462	1.0054e-28
GPRC5B	1.2594e-32	0.791485	0.896	0.353	2.84498e-28
APLP1	1.47854e-32	0.848262	0.933	0.409	3.34001e-28
MYRF	5.04835e-32	0.940799	0.798	0.346	1.14042e-27
GPM6B	7.5058e-32	0.798281	0.959	0.379	1.69556e-27
TMEM144	2.00532e-31	0.747156	0.907	0.35	4.53002e-27
MBP	3.26504e-30	0.798195	0.959	0.564	7.37573e-26
PTGDS	9.97103e-30	0.771474	0.881	0.351	2.25245e-25
CLDN11	1.98114e-28	0.846772	0.834	0.363	4.47539e-24
ENPP2	1.98722e-28	0.751205	0.824	0.325	4.48912e-24
MAG	7.11253e-28	0.762691	0.829	0.335	1.60672e-23
ABCA2	1.33275e-27	0.835063	0.741	0.314	3.01068e-23
LINC00844	3.00428e-27	0.778311	0.663	0.25	6.78666e-23
CALM2	1.75381e-26	0.675577	0.948	0.626	3.96185e-22
CNTN2	3.50737e-26	0.711634	0.808	0.338	7.92315e-22
EDIL3	5.16178e-26	0.71078	0.876	0.383	1.16605e-21
NCAM1	9.66558e-26	0.688143	0.845	0.364	2.18345e-21
AL807752.7	1.28161e-25	0.747587	0.813	0.335	2.89516e-21
PLEKHH1	1.99849e-25	0.717107	0.767	0.325	4.5146e-21
IL1RAPL1	1.10881e-24	0.637711	0.902	0.428	2.5048e-20
SLC44A1	1.66869e-24	0.613004	0.891	0.409	3.76958e-20
EFHD1	2.17255e-24	0.676225	0.793	0.335	4.9078e-20
PCDH9	2.21981e-24	0.559841	0.922	0.409	5.01455e-20
ERMN	2.2263e-24	0.690488	0.788	0.321	5.0292e-20
TF	1.48053e-23	0.595284	0.865	0.34	3.34451e-19
PIP4K2A	2.01901e-23	0.617233	0.917	0.45	4.56094e-19
TUBA1A	3.72289e-23	0.643671	0.839	0.417	8.41002e-19
NCAM2	3.83905e-23	0.67022	0.767	0.357	8.67241e-19
SELENOP	4.03731e-23	0.652593	0.808	0.351	9.12028e-19
QDPR	4.15151e-23	0.741602	0.731	0.333	9.37827e-19
SPOCK1	5.79856e-23	0.694474	0.772	0.35	1.30989e-18
TUBB4A	8.21107e-22	0.72455	0.694	0.293	1.85488e-17
CSRP1	1.06112e-21	0.636341	0.782	0.376	2.39708e-17
AATK	2.74234e-21	0.737181	0.606	0.249	6.19495e-17
SOX2-OT	3.0946e-21	0.630699	0.808	0.393	6.99071e-17
SEPTIN8	1.10979e-20	0.643432	0.694	0.29	2.50702e-16
STMN1	1.53476e-20	0.510365	0.788	0.359	3.46703e-16
CARNS1	3.21966e-20	0.609851	0.699	0.299	7.27322e-16
SOX10	1.1205e-19	0.638679	0.674	0.288	2.53121e-15
PLA2G16	2.9483e-19	0.641225	0.715	0.355	6.66022e-15
SCD	4.61112e-19	0.590997	0.756	0.355	1.04165e-14
ARHGAP23	7.30314e-19	0.754096	0.653	0.312	1.64978e-14
SLC24A2	9.1594e-19	0.57697	0.756	0.342	2.06911e-14
AMER2	1.35676e-18	0.581026	0.705	0.318	3.06492e-14
DPYSL2	1.39661e-18	0.613032	0.782	0.484	3.15494e-14
CD9	1.40985e-18	0.70047	0.648	0.32	3.18486e-14
HSPA2	2.20089e-18	0.552037	0.699	0.314	4.97182e-14
SUN2	3.76803e-18	0.741327	0.658	0.344	8.51198e-14
CAMK2N1	3.77779e-18	0.599926	0.705	0.346	8.53403e-14
NKX6-2	6.07661e-18	0.654529	0.58	0.258	1.37271e-13
APP	6.15563e-18	0.628253	0.725	0.393	1.39056e-13
MAL	6.7146e-18	0.615356	0.71	0.323	1.51683e-13
SOX8	8.31747e-18	0.671541	0.534	0.232	1.87892e-13
SCD5	9.67089e-18	0.687049	0.668	0.331	2.18465e-13
SEPTIN4	1.44983e-17	0.592807	0.679	0.307	3.27517e-13
MOBP	2.16131e-17	0.611195	0.637	0.297	4.8824e-13
RNASE1	2.49066e-17	0.613813	0.679	0.316	5.62639e-13
TMTC2	2.63899e-17	0.592023	0.684	0.327	5.96148e-13
PEBP1	4.00611e-17	0.556684	0.777	0.443	9.04981e-13
LAMP2	4.33069e-17	0.535359	0.803	0.454	9.78304e-13
TTLL7	5.82109e-17	0.547554	0.731	0.335	1.31498e-12
ST18	6.96828e-17	0.543844	0.72	0.366	1.57413e-12
LIMCH1	1.29334e-16	0.614009	0.668	0.342	2.92166e-12
DAAM2	1.34363e-16	0.669352	0.585	0.277	3.03525e-12
MAPT	2.39807e-16	0.664445	0.611	0.297	5.41724e-12
NDRG1	4.05227e-16	0.5674	0.668	0.333	9.15408e-12
PMP22	1.01697e-15	0.638975	0.606	0.297	2.29733e-11
PHLPP1	1.04878e-15	0.534759	0.694	0.342	2.36919e-11
TTYH2	1.1802e-15	0.625154	0.585	0.284	2.66608e-11
CALM1	1.3943e-15	0.508412	0.855	0.57	3.14973e-11
MT3	1.70574e-15	0.633078	0.565	0.256	3.85326e-11
ANLN	1.816e-15	0.57542	0.601	0.284	4.10235e-11
QKI	2.15918e-15	0.432446	0.953	0.701	4.8776e-11
PLLP	3.26071e-15	0.549335	0.606	0.28	7.36593e-11
PTPRD	3.36466e-15	0.455128	0.798	0.46	7.60078e-11
SORT1	4.05313e-15	0.539782	0.756	0.465	9.15601e-11
FTH1	6.97479e-15	0.474187	0.927	0.723	1.5756e-10
ATP1B1	8.56845e-15	0.564547	0.658	0.346	1.93561e-10
PPP1R14A	9.14851e-15	0.616944	0.534	0.237	2.06665e-10
LANCL1	1.24358e-14	0.485081	0.611	0.288	2.80925e-10
TSC22D4	1.74342e-14	0.591933	0.653	0.344	3.93839e-10
CFL2	1.76298e-14	0.568372	0.57	0.275	3.98258e-10
TRIM2	2.94139e-14	0.549477	0.653	0.331	6.64461e-10
NFASC	4.52464e-14	0.525997	0.585	0.28	1.02212e-09
SPOCK3	4.72856e-14	0.493096	0.611	0.299	1.06818e-09
FA2H	5.29753e-14	0.667279	0.56	0.295	1.19671e-09
SRPK3	6.98379e-14	0.564205	0.513	0.247	1.57764e-09
ANKS1B	8.02996e-14	0.533324	0.674	0.364	1.81397e-09
RGCC	9.90168e-14	0.512319	0.611	0.308	2.23679e-09
AL359091.1	1.14697e-13	0.753155	0.446	0.191	2.591e-09
SCARB2	1.22582e-13	0.583669	0.622	0.357	2.76914e-09
ZDHHC9	2.55409e-13	0.575169	0.513	0.247	5.76969e-09
MTATP6P1	2.58185e-13	0.445917	0.912	0.794	5.8324e-09
MARCKSL1	3.2723e-13	0.491328	0.617	0.308	7.39213e-09
MT-ND2	3.49131e-13	0.451353	0.953	0.89	7.88687e-09
AGAP1	3.89743e-13	0.551147	0.617	0.355	8.8043e-09
PLEKHB1	3.94725e-13	0.527824	0.642	0.361	8.91683e-09
PXK	4.10798e-13	0.611938	0.565	0.303	9.27994e-09
CDKN1C	5.22125e-13	0.583459	0.596	0.32	1.17948e-08
FAM107B	6.67015e-13	0.540818	0.611	0.336	1.50679e-08
ABCA8	7.32354e-13	0.509357	0.492	0.236	1.65439e-08
PLXNB3	7.43458e-13	0.538816	0.497	0.245	1.67947e-08
ATP8A1	8.33879e-13	0.50047	0.637	0.353	1.88373e-08
FEZ1	1.50365e-12	0.56163	0.549	0.28	3.39674e-08
GPR37	1.64233e-12	0.610828	0.492	0.243	3.71002e-08
GOLGA7	2.45111e-12	0.534665	0.466	0.222	5.53707e-08
RAPGEF5	4.0289e-12	0.52558	0.523	0.267	9.10128e-08
KCNMB4	4.1893e-12	0.509117	0.554	0.29	9.46364e-08
PHLDB1	4.978e-12	0.572592	0.549	0.286	1.12453e-07
SLCO1A2	5.71702e-12	0.579893	0.518	0.264	1.29147e-07
SHTN1	7.20536e-12	0.432661	0.767	0.482	1.62769e-07
SEPTIN7	8.10445e-12	0.484092	0.601	0.318	1.8308e-07
FRYL	1.09772e-11	0.522293	0.627	0.393	2.47974e-07
PDE1C	1.29774e-11	0.48368	0.528	0.269	2.93159e-07
PRNP	1.45217e-11	0.458666	0.554	0.299	3.28045e-07
SLAIN1	1.51954e-11	0.532489	0.523	0.264	3.43264e-07
SYT11	1.52562e-11	0.576473	0.56	0.31	3.44638e-07
MTUS1	1.63209e-11	0.513583	0.648	0.394	3.68689e-07
MAN2A1	1.73846e-11	0.500043	0.705	0.462	3.92719e-07
CKB	2.82822e-11	0.494991	0.596	0.348	6.38894e-07
IGSF8	2.86633e-11	0.563061	0.466	0.236	6.47503e-07
ELAVL3	3.26032e-11	0.497265	0.544	0.28	7.36507e-07
MT-CO2	3.27154e-11	0.397492	0.927	0.907	7.39041e-07
SLC48A1	3.6152e-11	0.498376	0.534	0.277	8.16674e-07
MBNL2	3.81172e-11	0.503024	0.611	0.374	8.61067e-07
FAM102A	4.76692e-11	0.628293	0.446	0.232	1.07685e-06
DNAJB2	5.2166e-11	0.445158	0.466	0.226	1.17843e-06
DOCK9	5.41863e-11	0.601672	0.508	0.288	1.22407e-06
SLC22A17	6.38101e-11	0.52535	0.472	0.249	1.44147e-06
FAIM2	6.718e-11	0.585817	0.404	0.196	1.5176e-06
TPPP	8.27979e-11	0.474924	0.523	0.269	1.8704e-06
MID1IP1	9.01449e-11	0.5183	0.44	0.224	2.03637e-06
DYSF	1.10035e-10	0.575641	0.425	0.217	2.48569e-06
VWA1	1.23583e-10	0.557598	0.487	0.252	2.79175e-06
VAMP2	1.37125e-10	0.490335	0.637	0.419	3.09765e-06
KIRREL3	1.56174e-10	0.570336	0.492	0.267	3.52797e-06
ANK3	1.67372e-10	0.392522	0.679	0.415	3.78093e-06
FOLH1	1.80335e-10	0.513165	0.435	0.219	4.07377e-06
NFIX	1.80479e-10	0.522104	0.461	0.241	4.07701e-06
GRM3	2.28133e-10	0.463513	0.503	0.271	5.15352e-06
AC110285.2	2.35002e-10	0.444172	0.28	0.101	5.3087e-06
MAP7	3.22512e-10	0.435954	0.606	0.333	7.28555e-06
CBR1	3.37092e-10	0.513226	0.534	0.305	7.6149e-06
PRUNE2	3.78579e-10	0.473873	0.539	0.305	8.5521e-06
AK5	4.25652e-10	0.512319	0.492	0.265	9.61547e-06
YWHAQ	5.30779e-10	0.495902	0.565	0.346	1.19903e-05
GABARAPL2	5.42793e-10	0.47662	0.461	0.25	1.22617e-05
NOVA1	5.72824e-10	0.516147	0.415	0.221	1.29401e-05
KLF13	5.74922e-10	0.548539	0.456	0.262	1.29875e-05
MT-TH	5.7705e-10	0.353686	0.855	0.753	1.30356e-05
RTN4	6.85178e-10	0.377434	0.855	0.634	1.54782e-05
MT-ND1	7.30013e-10	0.329848	0.964	0.942	1.6491e-05
TMTC4	7.98354e-10	0.582834	0.425	0.217	1.80348e-05
SECISBP2L	1.31534e-09	0.471441	0.497	0.273	2.97135e-05
FGFR2	1.44886e-09	0.462543	0.528	0.29	3.27297e-05
CLASP2	1.69724e-09	0.400168	0.642	0.406	3.83407e-05
RNF220	1.77379e-09	0.43744	0.596	0.359	4.007e-05
OLIG1	2.2209e-09	0.529181	0.44	0.226	5.01701e-05
MAGI2	2.26074e-09	0.331962	0.715	0.411	5.10702e-05
CNDP1	2.60309e-09	0.556195	0.378	0.187	5.88038e-05
DLG2	2.66586e-09	0.312045	0.705	0.428	6.02218e-05
GNAO1	2.84392e-09	0.535164	0.404	0.207	6.42441e-05
ERBIN	3.28822e-09	0.48448	0.56	0.361	7.42809e-05
MT-ND4	3.94917e-09	0.260637	0.995	0.983	8.92118e-05
SLCO3A1	4.31979e-09	0.571554	0.472	0.275	9.7584e-05
OMG	5.7062e-09	0.486136	0.43	0.234	0.000128903
DYNLL1	6.00561e-09	0.474979	0.518	0.335	0.000135667
JUND	6.5593e-09	0.47003	0.487	0.297	0.000148175
C1orf198	6.68506e-09	0.446035	0.456	0.247	0.000151015
DNM3	7.10999e-09	0.416041	0.554	0.321	0.000160615
DNAJC6	8.31624e-09	0.428082	0.472	0.262	0.000187864
CNTNAP4	9.10381e-09	0.499471	0.404	0.207	0.000205655
CDK18	9.45204e-09	0.517299	0.389	0.207	0.000213521
COL4A5	1.04297e-08	0.465594	0.487	0.275	0.000235606
LPAR1	1.42346e-08	0.530633	0.456	0.277	0.000321559
CALD1	1.53698e-08	0.511809	0.347	0.174	0.000347203
PPP2R2B	1.62569e-08	0.395469	0.596	0.344	0.000367243
CDC42EP1	1.69233e-08	0.441522	0.389	0.206	0.000382298
COL9A3	1.93294e-08	0.491512	0.29	0.129	0.000436651
BCAS1	2.45779e-08	0.503698	0.42	0.237	0.000555215
CLIC4	3.05281e-08	0.449003	0.461	0.28	0.000689631
CADM1	3.07516e-08	0.456797	0.497	0.297	0.000694678
CTNNA3	3.23993e-08	0.342354	0.642	0.407	0.000731901
PEX5L	4.02601e-08	0.431707	0.477	0.277	0.000909475
OPALIN	4.08637e-08	0.412947	0.399	0.204	0.000923111
MOG	4.94638e-08	0.381021	0.508	0.29	0.00111739
UGT8	5.49334e-08	0.353661	0.528	0.301	0.00124094
B3GAT1	6.05849e-08	0.415659	0.461	0.264	0.00136861
SGK1	6.07347e-08	0.388712	0.648	0.447	0.001372
ARAP2	6.44102e-08	0.459963	0.492	0.303	0.00145503
BEST1	7.06062e-08	0.43296	0.269	0.118	0.00159499
PTPRK	7.85242e-08	0.415049	0.528	0.32	0.00177386
RTKN	8.67785e-08	0.452928	0.358	0.187	0.00196033
KCNH8	1.07664e-07	0.463599	0.472	0.284	0.00243214
ARHGAP21	1.12025e-07	0.381094	0.642	0.452	0.00253064
FRMD5	1.30992e-07	0.382508	0.632	0.443	0.00295911
MT-ND3	1.32639e-07	0.273203	0.984	0.953	0.00299632
WBP2	1.4317e-07	0.438969	0.523	0.357	0.00323422
POU3F3	1.46293e-07	0.397785	0.264	0.118	0.00330477
LPGAT1	1.53836e-07	0.469132	0.42	0.243	0.00347516
PTK2	1.60151e-07	0.402949	0.554	0.366	0.00361782
ANAPC5	1.61262e-07	0.488498	0.415	0.254	0.00364291
ERBB3	1.61695e-07	0.401845	0.435	0.247	0.00365268
ZNF536	1.6306e-07	0.379292	0.487	0.279	0.00368353
TMEM165	1.65993e-07	0.384697	0.575	0.4	0.00374978
BEX3	1.88829e-07	0.43541	0.399	0.228	0.00426565
ASPA	1.8981e-07	0.484096	0.342	0.187	0.0042878
TBCB	2.02402e-07	0.478175	0.44	0.279	0.00457227
MT-TW	2.06311e-07	0.403344	0.71	0.57	0.00466057
DDX17	2.48329e-07	0.412715	0.689	0.535	0.00560975
ANK2	2.66572e-07	0.277674	0.617	0.393	0.00602187
TOM1L2	3.30666e-07	0.452712	0.389	0.224	0.00746976
AMOTL2	3.35802e-07	0.436252	0.383	0.217	0.00758576
ADIPOR2	3.95187e-07	0.362023	0.487	0.297	0.00892728
COBL	3.95754e-07	0.393911	0.404	0.239	0.00894009
SLC12A2	4.10463e-07	0.351502	0.446	0.258	0.00927236
KIAA0930	4.12808e-07	0.40558	0.477	0.297	0.00932534
PRR18	4.13404e-07	0.35906	0.342	0.183	0.0093388
SH3GL3	4.4929e-07	0.332638	0.451	0.25	0.0101495
PTP4A2	5.57275e-07	0.381904	0.554	0.406	0.0125888
YWHAE	5.76159e-07	0.468463	0.523	0.383	0.0130154
S100B	6.11205e-07	0.440939	0.44	0.265	0.0138071
SIRT2	6.15122e-07	0.387064	0.466	0.29	0.0138956
LGI3	6.95187e-07	0.425708	0.352	0.198	0.0157043
CDKN1B	8.24499e-07	0.410787	0.389	0.228	0.0186254
AC009041.2	8.54314e-07	0.384141	0.321	0.164	0.0192989
NDRG2	8.74066e-07	0.497459	0.503	0.346	0.0197451
PLEKHG3	8.95783e-07	0.4483	0.373	0.222	0.0202357
CDC42BPA	9.21572e-07	0.445562	0.358	0.204	0.0208183
MOB3B	1.05238e-06	0.438606	0.373	0.219	0.0237733
WHRN	1.06576e-06	0.448943	0.301	0.159	0.0240756
FGF1	1.12511e-06	0.394686	0.316	0.168	0.0254163
BIN1	1.1455e-06	0.285357	0.731	0.559	0.0258769
CPEB2	1.39006e-06	0.470179	0.332	0.194	0.0314013
SEMA6A	1.45019e-06	0.43812	0.399	0.241	0.0327599
ALDH6A1	1.55958e-06	0.449289	0.28	0.144	0.0352308
NUCKS1	1.5726e-06	0.393757	0.56	0.404	0.035525
JAM3	1.58326e-06	0.4707	0.394	0.241	0.0357659
LINC01578	1.701e-06	0.435052	0.399	0.247	0.0384255
RHOU	1.85666e-06	0.342133	0.399	0.234	0.0419419
PDE4B	1.9566e-06	0.355088	0.617	0.439	0.0441997
TSC22D1	1.96178e-06	0.346143	0.373	0.215	0.0443165
HIPK2	2.34229e-06	0.357726	0.466	0.307	0.0529123
CDK19	2.51063e-06	0.413196	0.42	0.262	0.0567152
LRP2	2.73169e-06	0.413602	0.311	0.164	0.0617089
NPAS3	3.04273e-06	0.43661	0.492	0.34	0.0687353
SELENOW	3.1055e-06	0.394024	0.503	0.346	0.0701533
ARFGEF3	3.23117e-06	0.354892	0.368	0.211	0.0729922
EIF1	3.40633e-06	0.356444	0.731	0.604	0.076949
FADS1	4.00222e-06	0.43541	0.316	0.179	0.0904103
CDH20	4.67665e-06	0.425051	0.399	0.254	0.105646
NPIPB2	4.91577e-06	0.371828	0.668	0.533	0.111047
GNAI1	5.18582e-06	0.380406	0.415	0.264	0.117148
SEPTIN2	5.62444e-06	0.342288	0.409	0.254	0.127056
MYO6	5.92991e-06	0.332154	0.394	0.234	0.133957
HHIP	6.17888e-06	0.335994	0.399	0.237	0.139581
PAQR8	6.47907e-06	0.382133	0.383	0.237	0.146362
MAGI2-AS3	7.12622e-06	0.428645	0.28	0.155	0.160981
FAR1	7.62246e-06	0.41621	0.404	0.264	0.172191
DSCAML1	8.25813e-06	0.304642	0.347	0.198	0.186551
SFRP1	8.47218e-06	0.408463	0.275	0.146	0.191387
PEA15	9.16279e-06	0.366716	0.389	0.25	0.206987
EVI2A	9.79235e-06	0.367372	0.554	0.404	0.221209
PON2	1.09142e-05	0.36045	0.337	0.198	0.246552
PRKACB	1.1336e-05	0.362396	0.404	0.262	0.25608
KLK6	1.13436e-05	0.385503	0.332	0.198	0.256251
C10orf90	1.15085e-05	0.362114	0.352	0.207	0.259977
ZBTB20	1.27582e-05	0.335719	0.674	0.555	0.288207
PCSK6	1.33048e-05	0.277127	0.399	0.23	0.300555
APBB1	1.39999e-05	0.435255	0.378	0.237	0.316258
TTYH1	1.52296e-05	0.425165	0.326	0.198	0.344036
NECAB1	1.54599e-05	0.360081	0.389	0.234	0.34924
PSAT1	1.58069e-05	0.371174	0.332	0.204	0.357077
PHACTR3	1.68111e-05	0.376847	0.316	0.185	0.379763
SEMA3B	1.69237e-05	0.33606	0.347	0.207	0.382307
GAB1	1.89319e-05	0.309375	0.477	0.325	0.427671
USP54	1.90635e-05	0.286255	0.42	0.26	0.430644
CREB5	2.14134e-05	0.250441	0.523	0.346	0.483729
AC012651.1	2.26592e-05	0.374618	0.358	0.226	0.511872
NRXN3	2.36218e-05	0.282671	0.544	0.374	0.533618
PDE8A	2.41444e-05	0.360413	0.415	0.277	0.545422
DIXDC1	2.54788e-05	0.346401	0.254	0.135	0.575566
NKAIN2	2.91494e-05	0.281394	0.508	0.338	0.658484
RNF130	2.94411e-05	0.383848	0.508	0.398	0.665075
PPDPF	3.08609e-05	0.420871	0.363	0.236	0.697148
SRP14	3.23113e-05	0.431064	0.373	0.264	0.729913
SERINC1	3.26159e-05	0.394081	0.446	0.331	0.736792
TJP2	3.39764e-05	0.386908	0.306	0.183	0.767526
CAPN3	3.51667e-05	0.368882	0.358	0.23	0.794416
SIK3	3.53147e-05	0.311726	0.575	0.422	0.797759
SRCIN1	3.76082e-05	0.361166	0.285	0.166	0.84957
FNBP1	3.85298e-05	0.378706	0.523	0.406	0.870388
HIP1	3.87114e-05	0.357886	0.383	0.252	0.87449
SLC6A8	3.89411e-05	0.341815	0.347	0.213	0.87968
FAM124A	4.15947e-05	0.377565	0.337	0.206	0.939624
KLHL32	4.44561e-05	0.325976	0.394	0.256	1
PLCL1	5.68852e-05	0.285644	0.482	0.344	1
CD22	5.80418e-05	0.408925	0.285	0.172	1
SERINC5	5.92816e-05	0.392398	0.347	0.23	1
PLXNB1	5.93636e-05	0.390169	0.306	0.189	1
CLMN	5.97183e-05	0.314908	0.404	0.265	1
ATG13	6.85197e-05	0.329814	0.295	0.179	1
ANO4	7.1875e-05	0.359433	0.363	0.228	1
SKP1	7.67175e-05	0.352587	0.399	0.288	1
TMEM59	7.73889e-05	0.322204	0.456	0.338	1
PALM2	7.77187e-05	0.372826	0.301	0.176	1
RFTN2	8.13749e-05	0.350017	0.301	0.187	1
ALCAM	9.35779e-05	0.326624	0.549	0.422	1
AL358113.1	9.75125e-05	0.365597	0.311	0.194	1
SPAG9	9.82963e-05	0.38923	0.378	0.275	1
AMD1	9.83803e-05	0.361086	0.363	0.249	1
LARP6	0.000103388	0.337823	0.306	0.194	1
C21orf91	0.000115768	0.411834	0.259	0.151	1
ARL8A	0.000118865	0.334098	0.321	0.206	1
CA2	0.000129391	0.321818	0.337	0.219	1
UBB	0.000129594	0.359279	0.549	0.458	1
CTSF	0.000141092	0.360524	0.29	0.178	1
TALDO1	0.000143843	0.275783	0.301	0.185	1
MICAL3	0.000148032	0.339057	0.306	0.196	1
SNRNP70	0.000148788	0.284995	0.492	0.396	1
SESTD1	0.000154344	0.32364	0.259	0.151	1
EPN2	0.000160254	0.356347	0.316	0.209	1
DPYSL5	0.000163865	0.32331	0.29	0.178	1
KIF5C	0.000174258	0.341636	0.264	0.157	1
ADARB2	0.000178752	0.315209	0.378	0.258	1
TMEM258	0.00018365	0.337893	0.301	0.194	1
RFFL	0.00019248	0.355994	0.264	0.161	1
MXI1	0.000196342	0.344788	0.368	0.245	1
ZCCHC24	0.000207093	0.39135	0.358	0.25	1
SLC31A2	0.000207347	0.407663	0.28	0.181	1
TNRC6C	0.000215909	0.329079	0.295	0.191	1
AC018521.1	0.000217817	0.29309	0.404	0.292	1
SYNJ2	0.000242535	0.300283	0.383	0.247	1
ABHD17B	0.000252314	0.39229	0.306	0.209	1
ITGB8	0.000255146	0.297111	0.321	0.206	1
NEO1	0.000258363	0.310354	0.29	0.189	1
VEZF1	0.000272693	0.352408	0.29	0.189	1
ENAH	0.000285777	0.338852	0.275	0.172	1
MRFAP1	0.000293409	0.324397	0.446	0.329	1
LHPP	0.00029875	0.306192	0.352	0.234	1
ZDHHC20	0.000301413	0.310699	0.316	0.204	1
ARPP19	0.000306536	0.321368	0.301	0.2	1
RUFY3	0.000319866	0.302614	0.435	0.325	1
MARCH1	0.000342845	0.347336	0.415	0.305	1
SPTBN1	0.000344365	0.348819	0.311	0.213	1
DNER	0.00035042	0.295069	0.373	0.26	1
RAB40B	0.000351841	0.274966	0.295	0.185	1
RETREG1	0.000357706	0.289252	0.347	0.23	1
CCDC88A	0.000369103	0.28419	0.585	0.473	1
MAP1B	0.000397194	0.36192	0.389	0.271	1
MPC1	0.000402433	0.352429	0.332	0.23	1
C9orf3	0.000431009	0.275952	0.358	0.26	1
APBB2	0.00043897	0.347985	0.425	0.31	1
CYTH1	0.000445183	0.297344	0.332	0.228	1
RNF144A	0.000451365	0.317085	0.264	0.164	1
KIF1A	0.000476104	0.294179	0.326	0.211	1
CDK5RAP3	0.000508794	0.298985	0.383	0.282	1
INF2	0.00050938	0.289211	0.254	0.155	1
PPM1B	0.000568206	0.344661	0.311	0.215	1
PHYHIPL	0.000597759	0.307789	0.29	0.185	1
OLIG2	0.000638287	0.345165	0.275	0.178	1
GDI1	0.000724706	0.295236	0.42	0.314	1
TMEM123	0.000751147	0.357361	0.311	0.222	1
TJP1	0.000761346	0.313983	0.415	0.305	1
MAP6D1	0.000783629	0.35364	0.259	0.164	1
NAV1	0.000791682	0.414212	0.342	0.249	1
NDUFA4	0.000873966	0.337667	0.347	0.256	1
BTBD3	0.000877907	0.264252	0.259	0.164	1
DLG1	0.000888118	0.38263	0.389	0.295	1
ARHGAP1	0.000928959	0.317389	0.352	0.252	1
NFIB	0.000933155	0.318905	0.285	0.193	1
DIP2C	0.000937201	0.321876	0.363	0.258	1
KIDINS220	0.00094835	0.320968	0.404	0.314	1
KIF1B	0.00097172	0.334325	0.435	0.329	1
PGRMC1	0.00100611	0.341557	0.306	0.213	1
CCP110	0.00110408	0.273518	0.28	0.187	1
AC131160.1	0.00112161	0.342755	0.264	0.172	1
POLR2F	0.00114444	0.295842	0.373	0.273	1
VAPA	0.00131385	0.407252	0.332	0.258	1
KIF13A	0.00133169	0.305728	0.301	0.211	1
ZKSCAN1	0.00134632	0.298637	0.321	0.232	1
GNPTG	0.00150796	0.254795	0.295	0.2	1
AC090772.3	0.00154552	0.370315	0.259	0.174	1
DSTN	0.001604	0.312504	0.254	0.174	1
RHOBTB3	0.00162391	0.348909	0.269	0.179	1
MAP7D1	0.00165388	0.277976	0.332	0.245	1
CTNND2	0.00181313	0.283034	0.352	0.254	1
TMEM87A	0.00185223	0.311619	0.358	0.282	1
BBX	0.00190678	0.288154	0.456	0.383	1
TERF2IP	0.00207688	0.30944	0.337	0.25	1
DOCK5	0.00217318	0.288382	0.472	0.387	1
CLK1	0.0022512	0.324173	0.409	0.329	1
COLGALT2	0.00225461	0.291906	0.269	0.179	1
CPNE2	0.00227932	0.333586	0.269	0.191	1
MEGF9	0.00233152	0.345853	0.275	0.194	1
EIF1AX	0.00260062	0.271401	0.332	0.249	1
OSBPL1A	0.00266052	0.287483	0.42	0.327	1
BOK	0.00271088	0.269572	0.28	0.191	1
PPA1	0.00280067	0.295676	0.28	0.2	1
AC093010.3	0.00287448	0.25819	0.254	0.17	1
DYNLRB1	0.00294085	0.359739	0.275	0.196	1
ADD3	0.00298672	0.314679	0.316	0.236	1
AC093525.1	0.0035713	0.295955	0.44	0.374	1
TYRO3	0.00368269	0.299242	0.254	0.178	1
CIRBP	0.0036913	0.269951	0.42	0.346	1
HNRNPDL	0.00383187	0.29021	0.497	0.426	1
COMT	0.00432631	0.327118	0.254	0.183	1
ATXN1	0.00462123	0.264184	0.466	0.417	1
ZNF280D	0.00474012	0.269286	0.264	0.189	1
SOD1	0.00486889	0.298685	0.378	0.31	1
PSRC1	0.00511233	0.318275	0.28	0.207	1
MTCH1	0.00554579	0.270174	0.306	0.228	1
MIR100HG	0.00607827	0.253791	0.316	0.228	1
PTBP2	0.0061397	0.275996	0.342	0.26	1
CHN2	0.00629577	0.261384	0.352	0.277	1
MYO1D	0.00654784	0.289052	0.311	0.232	1
PPM1K	0.00705693	0.295164	0.28	0.206	1
COX5B	0.00727661	0.275763	0.332	0.26	1
FAXDC2	0.00739455	0.25874	0.254	0.178	1
C1orf43	0.00748475	0.307611	0.321	0.25	1
PPFIA2	0.00769487	0.297572	0.269	0.198	1
AC004593.3	0.0081946	0.257309	0.342	0.269	1
AC010422.8	0.0104251	0.28034	0.269	0.206	1
GATM	0.0104595	0.267613	0.295	0.226	1
HTRA1	0.0110655	0.261814	0.461	0.402	1
GLTP	0.0117361	0.259389	0.301	0.228	1
EPB41L3	0.0117408	0.263922	0.363	0.303	1
RTN3	0.0126886	0.260894	0.409	0.336	1
CHCHD2	0.0126939	0.266909	0.378	0.327	1
DCTN1	0.0144135	0.311449	0.269	0.204	1
TIAF1	0.0145387	0.28081	0.254	0.198	1
DBI	0.0172694	0.256637	0.28	0.221	1
INSR	0.0186667	0.265737	0.311	0.247	1
ANKH	0.029394	0.273507	0.264	0.209	1
PAIP2	0.0294597	0.283378	0.311	0.26	1
FUT8	0.0315563	0.276005	0.311	0.25	1
NRDC	0.0332061	0.266011	0.295	0.249	1
MARCH6	0.0378459	0.275311	0.316	0.277	1
SELENOF	0.0423797	0.299715	0.259	0.217	1
ATP6V1E1	0.0598776	0.292482	0.269	0.232	1
ARHGEF2	0.0729497	0.315345	0.347	0.314	1
PPP2CB	0.0867059	0.250823	0.269	0.234	1

## Sheet: Progenitor 1
row.names	p_val	avg_logFC	pct.1	pct.2	p_val_adj
TF	2.16534e-64	1.32401	0.994	0.318	4.89151e-60
MAP7	2.85115e-62	1.10052	0.943	0.236	6.44074e-58
PCDH9	5.46869e-61	1.37797	0.994	0.404	1.23538e-56
PIP4K2A	2.24332e-58	1.16245	0.994	0.442	5.06767e-54
GPM6B	1.21911e-57	1.19471	1	0.386	2.75398e-53
SLC24A2	1.17531e-56	1.14724	0.954	0.294	2.65502e-52
PLP1	6.95833e-56	1.23097	1	0.478	1.57189e-51
IL1RAPL1	1.85428e-55	1.22351	1	0.413	4.18883e-51
SLC44A1	2.15785e-55	1.15012	0.989	0.395	4.87459e-51
MAL	4.15669e-55	1.09653	0.943	0.264	9.38995e-51
TTLL7	1.23367e-54	1.08835	0.931	0.285	2.78686e-50
RNF220	1.58319e-54	1.07422	0.925	0.264	3.57643e-50
CNP	1.92102e-54	1.15553	0.994	0.379	4.33959e-50
UGT8	4.37156e-54	1.06264	0.851	0.208	9.87536e-50
AL807752.7	1.12345e-53	1.1819	0.966	0.303	2.53787e-49
CRYAB	1.45986e-53	1.19209	1	0.406	3.29782e-49
PPP2R2B	2.95115e-53	1.14423	0.885	0.262	6.66664e-49
ERMN	3.50821e-53	1.04848	0.954	0.285	7.92504e-49
EFHD1	3.82458e-53	1.03107	0.966	0.296	8.63973e-49
SEPTIN4	4.29553e-53	1.03973	0.914	0.245	9.70361e-49
HSPA2	4.9601e-53	1.05382	0.92	0.258	1.12049e-48
NCAM1	5.40284e-53	1.02425	0.983	0.338	1.2205e-48
PTGDS	8.27241e-53	1.17963	0.977	0.339	1.86874e-48
EDIL3	1.38295e-52	1.05129	0.989	0.365	3.12408e-48
GPRC5B	1.59234e-52	1.06651	1	0.339	3.59709e-48
SCD	5.2232e-52	1.11985	0.937	0.312	1.17992e-47
APLP1	8.12398e-52	1.08087	1	0.406	1.83521e-47
AMER2	8.19838e-52	1.03528	0.925	0.262	1.85201e-47
CLDN11	3.81134e-51	0.984721	0.994	0.329	8.60983e-47
MAGI2	5.74955e-51	1.11499	0.937	0.352	1.29882e-46
SELENOP	1.57846e-50	1.00567	0.948	0.323	3.56573e-46
PRUNE2	1.69041e-50	0.962354	0.874	0.208	3.81863e-46
CNTN2	1.79527e-50	1.0547	0.966	0.305	4.05551e-46
TMEM144	2.5244e-50	1.06672	0.954	0.354	5.70263e-46
TRIM2	4.18887e-50	0.971685	0.908	0.262	9.46265e-46
TUBA1A	4.8073e-50	1.10743	0.971	0.39	1.08597e-45
CLDND1	5.99369e-50	1.09372	1	0.547	1.35398e-45
SCD5	6.48632e-50	0.888668	0.937	0.258	1.46526e-45
MBP	2.26613e-49	1.05692	1	0.565	5.11918e-45
ENPP2	2.27355e-49	0.950412	0.96	0.3	5.13596e-45
ATP8A1	4.27952e-49	0.982298	0.908	0.278	9.66742e-45
ST18	4.31387e-49	0.980195	0.943	0.309	9.74502e-45
STMN1	5.36267e-49	1.06113	0.925	0.33	1.21143e-44
MOG	6.34771e-49	1.01191	0.816	0.2	1.43395e-44
PEBP1	7.4271e-49	0.949355	0.977	0.392	1.67778e-44
SCHIP1	1.21979e-48	0.899103	0.718	0.128	2.75551e-44
LAMP2	1.6481e-48	0.994334	0.971	0.413	3.72307e-44
CARNS1	6.58537e-48	1.03609	0.891	0.253	1.48763e-43
MAG	7.468e-48	1.01894	0.954	0.312	1.68702e-43
CAMK2N1	1.10929e-47	0.957967	0.931	0.287	2.50589e-43
CLMN	1.14342e-47	0.908837	0.764	0.157	2.58298e-43
UNC5C	1.221e-47	1.0523	0.776	0.186	2.75823e-43
FA2H	1.5917e-47	0.812563	0.874	0.206	3.59565e-43
CBR1	1.90109e-47	0.821047	0.856	0.211	4.29456e-43
AC026316.4	2.34276e-47	1.08127	0.753	0.171	5.2923e-43
FGFR2	2.36212e-47	0.936146	0.828	0.204	5.33603e-43
SOX2-OT	3.4051e-47	0.966455	0.971	0.356	7.69212e-43
TPPP	3.91617e-47	0.948372	0.805	0.19	8.84663e-43
B3GAT1	6.65996e-47	0.871622	0.782	0.17	1.50449e-42
PLLP	1.86481e-46	0.978504	0.833	0.22	4.21261e-42
SPOCK1	2.43642e-46	0.965245	0.931	0.314	5.50386e-42
MAPT	2.73654e-46	0.857273	0.874	0.226	6.18183e-42
TSC22D4	3.34862e-46	0.939325	0.897	0.278	7.56453e-42
SLC7A14-AS1	4.019e-46	1.08078	0.69	0.141	9.07892e-42
CSRP1	4.12628e-46	1.06696	0.931	0.343	9.32127e-42
PMP22	4.71508e-46	0.844919	0.868	0.226	1.06514e-41
ELAVL3	5.76399e-46	0.918624	0.816	0.204	1.30208e-41
DLG2	5.96684e-46	0.966421	0.943	0.363	1.34791e-41
PHLPP1	7.46826e-46	0.986371	0.897	0.291	1.68708e-41
NFASC	1.77748e-45	0.961174	0.822	0.217	4.01533e-41
FEZ1	2.113e-45	0.878548	0.828	0.202	4.77327e-41
RGCC	3.23098e-45	0.904736	0.868	0.238	7.29878e-41
NDRG1	4.05173e-45	0.903736	0.891	0.274	9.15285e-41
NKAIN2	1.11112e-44	0.954501	0.839	0.24	2.51001e-40
PLEKHH1	1.34518e-44	0.920843	0.914	0.294	3.03876e-40
CLASP2	1.42067e-44	0.979442	0.902	0.332	3.2093e-40
MARCKSL1	1.61974e-44	1.03998	0.839	0.249	3.65898e-40
HEPACAM	1.6591e-44	0.68806	0.626	0.092	3.7479e-40
CREB5	1.66004e-44	0.949068	0.851	0.249	3.75003e-40
ANKS1B	1.70981e-44	0.92046	0.914	0.3	3.86247e-40
RNASE1	2.06263e-44	0.980285	0.874	0.267	4.65948e-40
MAP1B	2.17426e-44	0.842455	0.747	0.162	4.91166e-40
CERCAM	2.17631e-44	0.8956	0.983	0.347	4.91629e-40
PHLDB1	2.76886e-44	0.874625	0.822	0.209	6.25486e-40
TMEM63A	3.47918e-44	0.834553	0.701	0.144	7.85946e-40
COL4A5	3.67388e-44	0.904719	0.787	0.188	8.29929e-40
APOD	3.75876e-44	0.925254	0.994	0.345	8.49105e-40
SOX10	3.84389e-44	0.938818	0.851	0.245	8.68334e-40
PLEKHB1	3.98029e-44	0.91938	0.891	0.292	8.99147e-40
RTN4	4.44136e-44	0.895826	0.971	0.605	1.0033e-39
CTNNA3	4.5707e-44	0.949731	0.914	0.33	1.03252e-39
USP54	4.62978e-44	0.900988	0.736	0.166	1.04587e-39
SIK3	4.99612e-44	0.928146	0.897	0.327	1.12862e-39
SYT11	5.7397e-44	0.840605	0.845	0.229	1.2966e-39
QKI	6.13335e-44	0.844843	1	0.695	1.38552e-39
TMTC2	7.84317e-44	1.02183	0.868	0.282	1.77177e-39
ERBB3	7.90244e-44	0.844182	0.736	0.159	1.78516e-39
ANLN	8.01383e-44	0.882897	0.833	0.222	1.81032e-39
TUBB4A	1.05519e-43	0.894978	0.868	0.253	2.38367e-39
LIMCH1	1.09412e-43	0.865851	0.897	0.282	2.47161e-39
SH3GL3	1.37379e-43	0.938362	0.73	0.17	3.10339e-39
ATP1B1	3.46237e-43	0.866073	0.885	0.285	7.82149e-39
GLTP	8.2013e-43	0.790813	0.655	0.119	1.85267e-38
ABCA2	8.67995e-43	0.809893	0.925	0.271	1.9608e-38
PTK2	9.38812e-43	0.87974	0.879	0.271	2.12078e-38
SIRT2	9.58682e-43	0.887381	0.782	0.197	2.16566e-38
SEPTIN7	9.88986e-43	0.949997	0.828	0.256	2.23412e-38
FAM107B	1.25175e-42	0.8533	0.874	0.264	2.82771e-38
MOBP	1.28083e-42	0.860249	0.856	0.24	2.89339e-38
S100B	1.28325e-42	0.860597	0.753	0.173	2.89886e-38
ANK2	1.3087e-42	0.967319	0.885	0.316	2.95634e-38
ZNF536	1.54163e-42	0.955488	0.764	0.199	3.48254e-38
MAN2A1	1.72e-42	0.901193	0.948	0.394	3.88548e-38
DNAJC6	3.41894e-42	0.891245	0.759	0.179	7.72339e-38
PEX5L	3.57218e-42	0.916918	0.77	0.191	8.06956e-38
CALM2	6.27601e-42	0.832258	0.994	0.623	1.41775e-37
SPOCK3	6.80766e-42	0.924615	0.822	0.244	1.53785e-37
QDPR	6.89026e-42	0.943455	0.897	0.294	1.55651e-37
KCNMB4	8.30053e-42	0.850268	0.816	0.217	1.87509e-37
RTN3	1.51389e-41	0.797782	0.787	0.22	3.41987e-37
ARHGAP21	1.52552e-41	0.905734	0.925	0.37	3.44614e-37
SYNJ2	5.3744e-41	0.861997	0.69	0.155	1.21408e-36
ADARB2	6.10591e-41	0.797771	0.718	0.155	1.37932e-36
PTPRD	6.54747e-41	0.977843	0.948	0.424	1.47907e-36
RETREG1	8.91425e-41	0.831158	0.667	0.134	2.01373e-36
LANCL1	1.12521e-40	1.00902	0.799	0.24	2.54185e-36
KIF1B	1.23978e-40	0.822243	0.787	0.222	2.80066e-36
MYRF	1.75432e-40	0.772364	0.96	0.31	3.96302e-36
NCAM2	1.78625e-40	0.925409	0.914	0.325	4.03515e-36
SBDS	3.12741e-40	0.691597	0.621	0.108	7.06483e-36
AK5	3.50135e-40	0.829717	0.759	0.19	7.90954e-36
ELOVL1	4.83388e-40	0.83025	0.678	0.152	1.09197e-35
NECAB1	5.56541e-40	0.831867	0.678	0.148	1.25723e-35
SEMA6A	6.04629e-40	0.757694	0.707	0.15	1.36586e-35
NRXN3	6.52365e-40	1.00961	0.845	0.285	1.47369e-35
SLAIN1	6.72125e-40	0.800936	0.759	0.199	1.51833e-35
SEPTIN8	8.39397e-40	0.935962	0.828	0.262	1.8962e-35
VWA1	1.40648e-39	0.790868	0.741	0.181	3.17724e-35
AGAP1	2.23348e-39	0.79783	0.885	0.28	5.04542e-35
DNM3	2.62656e-39	0.927137	0.805	0.251	5.93341e-35
DAAM2	4.20407e-39	0.789153	0.805	0.218	9.49699e-35
SLCO1A2	4.28875e-39	0.766458	0.764	0.195	9.6883e-35
HHIP	4.62124e-39	0.890708	0.678	0.155	1.04394e-34
GPR37	5.59945e-39	0.767619	0.741	0.173	1.26492e-34
SORT1	5.81321e-39	0.842892	0.943	0.417	1.3132e-34
PLA2G16	7.51285e-39	0.832032	0.879	0.316	1.69715e-34
PCSK6	1.23784e-38	0.960238	0.661	0.153	2.79627e-34
KLHL32	1.49751e-38	0.782069	0.701	0.164	3.38287e-34
POLR2F	1.53616e-38	0.763527	0.713	0.17	3.47019e-34
KCNH8	1.55271e-38	0.77687	0.759	0.2	3.50757e-34
APP	1.93986e-38	0.80901	0.914	0.345	4.38214e-34
RHOU	1.98032e-38	0.823446	0.678	0.152	4.47354e-34
OTUD7A	2.01771e-38	0.70685	0.615	0.116	4.55801e-34
DST	2.08626e-38	0.931281	0.891	0.374	4.71285e-34
OLIG1	2.3484e-38	0.795953	0.69	0.155	5.30504e-34
YWHAQ	3.49091e-38	0.83508	0.828	0.271	7.88597e-34
IQCJ-SCHIP1	4.51689e-38	0.850242	0.741	0.202	1.02036e-33
DOCK9	4.68231e-38	0.732095	0.787	0.208	1.05773e-33
BOK	5.89864e-38	0.72776	0.58	0.099	1.3325e-33
CALM1	6.67576e-38	0.799217	0.977	0.542	1.50805e-33
CA2	1.26327e-37	0.812096	0.638	0.128	2.85373e-33
NKX6-2	2.11707e-37	0.752072	0.782	0.206	4.78247e-33
MT3	2.39855e-37	0.841025	0.759	0.206	5.41833e-33
TMEM165	2.94254e-37	0.871165	0.862	0.316	6.6472e-33
BCAS1	3.30275e-37	0.746328	0.695	0.157	7.46092e-33
KIF1A	3.36255e-37	0.776042	0.615	0.125	7.59599e-33
CDH20	4.41567e-37	0.797769	0.707	0.162	9.975e-33
JAM3	4.65646e-37	0.6892	0.69	0.153	1.0519e-32
PTPRK	6.09242e-37	0.842043	0.782	0.247	1.37628e-32
CDH19	6.21762e-37	0.698573	0.523	0.078	1.40456e-32
CDKN1C	8.93355e-37	0.776737	0.828	0.256	2.01809e-32
SEMA3B	1.00406e-36	0.807396	0.621	0.126	2.26818e-32
GRM3	1.05256e-36	0.769516	0.753	0.2	2.37774e-32
ADIPOR2	1.08414e-36	0.768934	0.753	0.22	2.44907e-32
CFL2	1.17487e-36	0.813785	0.776	0.22	2.65402e-32
ANK3	1.62279e-36	0.894893	0.885	0.359	3.66589e-32
MTUS1	1.62393e-36	0.831316	0.879	0.33	3.66846e-32
LHPP	1.88267e-36	0.831514	0.644	0.146	4.25296e-32
DNER	2.00947e-36	0.767071	0.69	0.164	4.53939e-32
OMG	2.01386e-36	0.712074	0.69	0.159	4.54932e-32
DPYSL2	2.30225e-36	0.782358	0.948	0.442	5.20077e-32
SELENOW	2.47216e-36	0.827812	0.793	0.26	5.58462e-32
AKAP6	2.59764e-36	0.789322	0.626	0.135	5.86806e-32
APBB2	2.81813e-36	0.735131	0.759	0.209	6.36616e-32
KLK6	3.55927e-36	0.702788	0.609	0.116	8.04038e-32
CCDC88A	4.90901e-36	0.803668	0.902	0.377	1.10894e-31
SUN2	4.96386e-36	0.743593	0.856	0.292	1.12134e-31
SLC48A1	4.96758e-36	0.812225	0.753	0.217	1.12218e-31
ARHGAP23	6.20993e-36	0.732264	0.839	0.265	1.40282e-31
SECISBP2L	7.53713e-36	0.778194	0.736	0.206	1.70264e-31
CKB	8.58014e-36	0.825063	0.839	0.28	1.93825e-31
RAPGEF5	8.79257e-36	0.736301	0.747	0.206	1.98624e-31
DOCK5	9.69467e-36	0.797091	0.81	0.283	2.19003e-31
PLXNB3	1.25072e-35	0.760389	0.724	0.182	2.82538e-31
ITGA2	1.31727e-35	0.614252	0.529	0.087	2.97572e-31
APBB1	1.39828e-35	0.688585	0.661	0.153	3.15871e-31
ZCCHC24	2.09807e-35	0.710982	0.672	0.155	4.73953e-31
TTYH2	2.92079e-35	0.754937	0.782	0.233	6.59805e-31
OSBPL1A	3.12222e-35	0.829931	0.741	0.229	7.05309e-31
PXK	3.43204e-35	0.731928	0.787	0.242	7.75298e-31
MXI1	4.47845e-35	0.736579	0.655	0.159	1.01168e-30
DIP2C	5.50499e-35	0.689507	0.672	0.164	1.24358e-30
FTH1	8.81313e-35	0.749727	0.994	0.709	1.99089e-30
SHTN1	1.33594e-34	0.810539	0.908	0.448	3.0179e-30
SRPK3	1.53474e-34	0.752647	0.724	0.19	3.46697e-30
FMNL2	1.5554e-34	0.823593	0.914	0.446	3.51365e-30
LGI3	2.51734e-34	0.663133	0.609	0.123	5.68668e-30
PDE1C	3.15662e-34	0.820097	0.73	0.215	7.1308e-30
NDRG2	3.35094e-34	0.735028	0.805	0.256	7.56978e-30
MRFAP1	6.89233e-34	0.698691	0.759	0.235	1.55698e-29
C10orf90	7.57913e-34	0.745464	0.609	0.132	1.71212e-29
CD9	7.85883e-34	0.754528	0.822	0.276	1.77531e-29
OPALIN	1.61039e-33	0.900243	0.615	0.143	3.63788e-29
SLC6A8	3.79212e-33	0.707063	0.603	0.137	8.56641e-29
MBNL2	5.51758e-33	0.768389	0.833	0.312	1.24642e-28
OLIG2	6.3078e-33	0.65084	0.54	0.097	1.42493e-28
ABCA8	6.4635e-33	0.761861	0.69	0.182	1.4601e-28
PPP1R14A	7.11436e-33	0.777898	0.701	0.195	1.60713e-28
VAMP2	7.70572e-33	0.717817	0.879	0.35	1.74072e-28
FRMD5	1.16651e-32	0.81153	0.851	0.381	2.63514e-28
FOLH1	1.17116e-32	0.710824	0.655	0.157	2.64566e-28
FAXDC2	1.8843e-32	0.662597	0.523	0.096	4.25663e-28
BACE1	1.89367e-32	0.695676	0.529	0.101	4.2778e-28
EVI2A	1.9149e-32	0.750019	0.833	0.321	4.32576e-28
FAM102A	2.22051e-32	0.622363	0.678	0.166	5.01613e-28
FAM13C	2.40603e-32	0.630969	0.54	0.099	5.43521e-28
FAM124A	3.07148e-32	0.715478	0.592	0.13	6.93848e-28
AATK	4.03445e-32	0.673169	0.747	0.217	9.11383e-28
ALCAM	5.54112e-32	0.759462	0.845	0.334	1.25174e-27
LDB3	6.00141e-32	0.613771	0.511	0.09	1.35572e-27
CADM2	7.15223e-32	0.895128	0.782	0.274	1.61569e-27
SLCO3A1	7.2675e-32	0.662051	0.718	0.204	1.64173e-27
HIP1	7.85304e-32	0.684448	0.661	0.17	1.774e-27
ALDOC	9.49484e-32	0.730245	0.448	0.07	2.14488e-27
TJP1	1.00384e-31	0.686171	0.707	0.217	2.26767e-27
GNAI1	1.15778e-31	0.641538	0.684	0.184	2.61542e-27
TMEFF2	1.20361e-31	0.798833	0.609	0.144	2.71896e-27
PALM2	1.29398e-31	0.692512	0.534	0.106	2.9231e-27
CLIC4	1.58251e-31	0.733505	0.713	0.208	3.57488e-27
SILC1	2.10827e-31	0.621042	0.471	0.076	4.76259e-27
MAP4K5	2.47399e-31	0.744369	0.632	0.166	5.58874e-27
SGK1	3.24397e-31	0.713948	0.897	0.375	7.32813e-27
SRPK2	4.18183e-31	0.751645	0.626	0.166	9.44676e-27
PAQR8	4.18183e-31	0.643753	0.638	0.162	9.44676e-27
PTBP2	6.84837e-31	0.69366	0.638	0.17	1.54705e-26
SOX8	1.25046e-30	0.624279	0.707	0.188	2.8248e-26
SASH1	1.59261e-30	0.703841	0.546	0.119	3.5977e-26
PDE4B	1.62775e-30	0.78892	0.856	0.37	3.67708e-26
ANO4	1.62976e-30	0.710014	0.615	0.153	3.68163e-26
HDAC11	1.84748e-30	0.524486	0.385	0.045	4.17345e-26
COBL	2.05696e-30	0.677755	0.644	0.17	4.64668e-26
TYRO3	2.15861e-30	0.573194	0.517	0.097	4.87631e-26
MYO6	2.77574e-30	0.750601	0.626	0.166	6.2704e-26
CADM1	3.53463e-30	0.710941	0.736	0.229	7.98474e-26
TPPP3	3.58307e-30	0.673403	0.592	0.144	8.09416e-26
LPAR1	4.00934e-30	0.636521	0.707	0.204	9.0571e-26
NTM	4.52896e-30	0.714534	0.626	0.17	1.02309e-25
ARAP2	5.13225e-30	0.701575	0.724	0.236	1.15938e-25
CLU	5.48023e-30	0.686643	0.649	0.182	1.23798e-25
MAP4K4	5.80801e-30	0.715868	0.862	0.394	1.31203e-25
LARP6	6.76986e-30	0.608757	0.563	0.117	1.52931e-25
AC090772.3	6.95997e-30	0.538212	0.511	0.097	1.57226e-25
C1orf198	7.5198e-30	0.702396	0.661	0.19	1.69872e-25
AGPAT4	8.57467e-30	0.622059	0.46	0.079	1.93702e-25
RDX	9.14276e-30	0.732019	0.724	0.253	2.06535e-25
LIFR	9.68013e-30	0.573494	0.523	0.108	2.18674e-25
MAP6D1	9.8169e-30	0.563799	0.5	0.092	2.21764e-25
RAB40B	1.02099e-29	0.679895	0.534	0.114	2.30641e-25
PRR18	1.07821e-29	0.660857	0.557	0.121	2.43567e-25
DYNLL1	1.10399e-29	0.637536	0.787	0.256	2.49392e-25
INPP1	1.44957e-29	0.589909	0.431	0.065	3.27457e-25
FNBP1	1.70334e-29	0.683292	0.828	0.314	3.84785e-25
CD22	1.75059e-29	0.555649	0.523	0.101	3.95459e-25
CAPN3	1.97655e-29	0.700385	0.609	0.155	4.46503e-25
MYO1D	2.10355e-29	0.638123	0.592	0.146	4.75191e-25
CDC42EP1	2.4584e-29	0.65633	0.603	0.144	5.55352e-25
EID1	2.71082e-29	0.647485	0.569	0.135	6.12374e-25
AC012651.1	2.71799e-29	0.702687	0.603	0.153	6.13994e-25
NPAS3	5.22211e-29	0.660417	0.77	0.258	1.17967e-24
TTYH1	6.82228e-29	0.585839	0.569	0.126	1.54115e-24
AC131160.1	7.55348e-29	0.583575	0.506	0.099	1.70633e-24
LINC00320	8.11139e-29	0.574396	0.46	0.078	1.83236e-24
ITGB8	8.29393e-29	0.637192	0.569	0.132	1.8736e-24
FRYL	8.51272e-29	0.709661	0.822	0.339	1.92302e-24
PLEKHG3	8.6875e-29	0.628267	0.615	0.152	1.96251e-24
GAB1	9.63244e-29	0.763798	0.718	0.255	2.17597e-24
HIPK2	9.76288e-29	0.746547	0.701	0.238	2.20544e-24
RALGDS	1.32675e-28	0.572206	0.5	0.097	2.99714e-24
ZDHHC9	1.36762e-28	0.677926	0.678	0.204	3.08944e-24
SCARB2	2.00281e-28	0.657377	0.81	0.307	4.52436e-24
CELSR2	2.27287e-28	0.620481	0.489	0.097	5.13442e-24
MIR100HG	2.53331e-28	0.60213	0.586	0.146	5.72275e-24
PHACTR3	2.6269e-28	0.593918	0.54	0.119	5.93417e-24
MIGA1	2.82614e-28	0.558493	0.454	0.081	6.38426e-24
CIRBP	2.91324e-28	0.626704	0.741	0.247	6.58102e-24
PRRG1	3.27201e-28	0.488402	0.339	0.034	7.39147e-24
LINC00844	4.07264e-28	0.716212	0.747	0.238	9.20008e-24
SLC22A17	4.09247e-28	0.644075	0.672	0.193	9.24488e-24
DPYSL5	4.31558e-28	0.673528	0.517	0.11	9.7489e-24
WBP2	4.88352e-28	0.655293	0.787	0.28	1.10319e-23
RAB30	5.02705e-28	0.520467	0.437	0.074	1.13561e-23
IQCK	6.4455e-28	0.578867	0.448	0.079	1.45604e-23
SLC12A2	7.01924e-28	0.703054	0.644	0.202	1.58565e-23
PKP4	7.11197e-28	0.692961	0.58	0.155	1.60659e-23
CDK18	9.21809e-28	0.559182	0.598	0.148	2.08237e-23
OTUD7B	9.27517e-28	0.517985	0.425	0.069	2.09526e-23
COLGALT2	1.13393e-27	0.593384	0.506	0.108	2.56156e-23
PCBP4	1.14649e-27	0.565341	0.437	0.076	2.58991e-23
GLUL	1.16514e-27	0.682128	0.868	0.422	2.63205e-23
FUT8	1.33621e-27	0.662491	0.592	0.164	3.0185e-23
CCP110	1.53485e-27	0.604888	0.523	0.114	3.46723e-23
ARHGAP1	1.56027e-27	0.683742	0.615	0.173	3.52464e-23
TMEM98	1.64508e-27	0.560924	0.483	0.094	3.71623e-23
HIP1R	1.73016e-27	0.553501	0.443	0.078	3.90844e-23
MPDZ	2.96461e-27	0.593838	0.489	0.099	6.69705e-23
CNDP1	3.59961e-27	0.603053	0.563	0.135	8.13151e-23
ZBTB20	3.71204e-27	0.686	0.914	0.484	8.38549e-23
RFTN2	5.58157e-27	0.557955	0.534	0.117	1.26088e-22
FAM171A1	6.60848e-27	0.618351	0.471	0.097	1.49286e-22
PHYHIPL	7.23588e-27	0.613753	0.517	0.117	1.63459e-22
IGSF8	8.27259e-27	0.61524	0.644	0.188	1.86878e-22
NIPAL3	1.14034e-26	0.563132	0.443	0.081	2.57602e-22
MAPK8IP1	1.23327e-26	0.595943	0.448	0.087	2.78597e-22
PLCL1	1.34051e-26	0.693841	0.736	0.269	3.02821e-22
SOD1	1.87732e-26	0.618347	0.69	0.215	4.24087e-22
SRCIN1	2.45992e-26	0.545582	0.494	0.105	5.55697e-22
DLG1	2.88093e-26	0.61017	0.667	0.211	6.50802e-22
ADAMTS4	3.09744e-26	0.535627	0.374	0.054	6.99712e-22
TBCB	3.10306e-26	0.598138	0.672	0.211	7.00981e-22
PTN	4.22758e-26	0.567108	0.328	0.04	9.5501e-22
ASPA	4.43372e-26	0.523691	0.552	0.126	1.00158e-21
PPP1R16B	4.88969e-26	0.536423	0.46	0.088	1.10458e-21
DSCAML1	6.97777e-26	0.689706	0.546	0.141	1.57628e-21
KIAA0930	7.15641e-26	0.659521	0.684	0.238	1.61663e-21
PAQR4	7.21095e-26	0.523388	0.397	0.065	1.62895e-21
GNAO1	8.02985e-26	0.625125	0.586	0.157	1.81394e-21
KIRREL3	9.77127e-26	0.641109	0.678	0.217	2.20733e-21
TPRN	1.06565e-25	0.494052	0.385	0.06	2.40729e-21
TMEM151A	1.14154e-25	0.505432	0.391	0.061	2.57874e-21
ARFGEF3	1.38773e-25	0.620421	0.569	0.153	3.13489e-21
SLC6A1	1.59488e-25	0.560381	0.408	0.07	3.60283e-21
CADM4	1.72587e-25	0.564077	0.402	0.069	3.89875e-21
SERINC5	2.30984e-25	0.580446	0.586	0.159	5.21792e-21
ABHD17B	2.37754e-25	0.524503	0.552	0.135	5.37086e-21
TMCC2	2.50315e-25	0.531112	0.448	0.088	5.65462e-21
NOVA1	2.83608e-25	0.548446	0.609	0.166	6.4067e-21
AC009041.2	3.10773e-25	0.561518	0.494	0.116	7.02035e-21
NXPE3	3.35479e-25	0.475687	0.374	0.056	7.57847e-21
PLXNB1	3.50082e-25	0.539187	0.529	0.123	7.90836e-21
DNAJB2	3.74304e-25	0.708842	0.609	0.19	8.45554e-21
TMTC4	4.02626e-25	0.605706	0.592	0.171	9.09533e-21
PIEZO2	4.84426e-25	0.606328	0.483	0.11	1.09432e-20
AMOTL2	4.85114e-25	0.619703	0.58	0.161	1.09587e-20
CDC42BPA	5.0644e-25	0.596025	0.557	0.146	1.14405e-20
LINC00609	5.60428e-25	0.499516	0.351	0.051	1.26601e-20
DPYD	5.66527e-25	0.639919	0.718	0.265	1.27978e-20
LSAMP	5.66563e-25	0.675399	0.609	0.184	1.27987e-20
ENOSF1	5.77923e-25	0.541137	0.437	0.085	1.30553e-20
SH3TC2	6.26393e-25	0.52018	0.379	0.061	1.41502e-20
AGTPBP1	6.61866e-25	0.580949	0.563	0.155	1.49515e-20
CERS2	7.04491e-25	0.591449	0.523	0.134	1.59145e-20
PSRC1	7.87409e-25	0.56127	0.534	0.13	1.77876e-20
DDR1	8.89875e-25	0.55704	0.489	0.112	2.01023e-20
VAMP3	1.01255e-24	0.518517	0.517	0.125	2.28735e-20
ATP10B	1.23735e-24	0.532648	0.425	0.081	2.79518e-20
LPGAT1	1.27132e-24	0.593965	0.615	0.188	2.87191e-20
HSPA8	1.29898e-24	0.523542	0.736	0.274	2.93441e-20
RNF144A	1.46811e-24	0.555255	0.471	0.103	3.31645e-20
PDE8A	1.56827e-24	0.631139	0.638	0.211	3.54272e-20
PRKACB	1.5887e-24	0.608755	0.626	0.197	3.58886e-20
TARSL2	1.59183e-24	0.43044	0.425	0.081	3.59595e-20
AC011504.1	1.59751e-24	0.471374	0.408	0.072	3.60877e-20
FRMD4B	1.61575e-24	0.713259	0.753	0.334	3.64997e-20
MBOAT2	1.63823e-24	0.494061	0.397	0.067	3.70076e-20
RUFY3	1.80857e-24	0.657107	0.684	0.251	4.08557e-20
SPTBN1	1.83471e-24	0.513644	0.552	0.141	4.1446e-20
CMTM5	1.89188e-24	0.520439	0.391	0.067	4.27375e-20
NEO1	1.9677e-24	0.516331	0.517	0.121	4.44504e-20
BTBD3	1.98811e-24	0.572685	0.466	0.103	4.49114e-20
TSPAN5	2.14289e-24	0.67671	0.575	0.166	4.84079e-20
FAIM2	2.35509e-24	0.497323	0.575	0.15	5.32015e-20
HHATL	2.93164e-24	0.486812	0.356	0.054	6.62258e-20
CES4A	3.64436e-24	0.534444	0.333	0.047	8.2326e-20
MALAT1	3.91751e-24	0.52839	1	0.89	8.84966e-20
RBPJ	4.24163e-24	0.61795	0.718	0.274	9.58185e-20
DOCK10	4.75299e-24	0.707994	0.868	0.482	1.0737e-19
BCAR1	4.85287e-24	0.459063	0.362	0.056	1.09626e-19
POLR2I	5.65409e-24	0.502561	0.379	0.065	1.27726e-19
ENPP4	5.77055e-24	0.472728	0.397	0.072	1.30357e-19
STK39	6.25464e-24	0.532111	0.42	0.083	1.41292e-19
CNTNAP4	6.689e-24	0.660109	0.563	0.164	1.51104e-19
ENDOD1	7.16617e-24	0.514197	0.408	0.078	1.61884e-19
KIDINS220	8.36925e-24	0.590302	0.661	0.236	1.89061e-19
TOM1L2	8.84877e-24	0.567708	0.586	0.168	1.99894e-19
PRNP	9.15497e-24	0.656352	0.695	0.264	2.06811e-19
CHADL	9.28342e-24	0.533252	0.408	0.078	2.09712e-19
PSEN1	1.13398e-23	0.542202	0.557	0.155	2.56166e-19
UBB	1.1355e-23	0.692576	0.816	0.377	2.56509e-19
MAP7D1	1.32385e-23	0.527083	0.586	0.168	2.99058e-19
BIN1	1.5253e-23	0.581307	0.925	0.504	3.44566e-19
SLC31A2	1.8512e-23	0.447925	0.5	0.116	4.18186e-19
ENOX1	1.87732e-23	0.671256	0.546	0.159	4.24087e-19
NACAD	2.02317e-23	0.525794	0.345	0.054	4.57033e-19
HNRNPDL	2.24937e-23	0.61175	0.77	0.343	5.08133e-19
ZEB2	2.32893e-23	0.663058	0.868	0.495	5.26104e-19
MAP1A	2.55755e-23	0.527245	0.437	0.094	5.77752e-19
NFIX	2.64482e-23	0.597261	0.621	0.199	5.97465e-19
HTRA1	3.7904e-23	0.573792	0.764	0.309	8.56252e-19
FYN	3.94555e-23	0.582817	0.517	0.137	8.913e-19
WSB1	3.9543e-23	0.527115	0.908	0.489	8.93277e-19
CTNND2	4.06856e-23	0.594555	0.592	0.182	9.19088e-19
AL359091.1	4.98963e-23	0.533164	0.563	0.162	1.12716e-18
RAB11FIP4	5.11421e-23	0.446313	0.345	0.054	1.1553e-18
C9orf3	5.41696e-23	0.551229	0.609	0.184	1.22369e-18
H3F3B	5.54581e-23	0.450527	0.931	0.5	1.2528e-18
ANKIB1	5.63914e-23	0.615385	0.569	0.175	1.27388e-18
NAPEPLD	5.68262e-23	0.523424	0.431	0.092	1.2837e-18
RTKN	6.74193e-23	0.527245	0.529	0.139	1.523e-18
TMEM59	6.84122e-23	0.615695	0.707	0.264	1.54543e-18
NUCKS1	7.12564e-23	0.615548	0.782	0.339	1.60968e-18
KCNJ10	7.20301e-23	0.55177	0.425	0.09	1.62716e-18
GOLGA7	7.86632e-23	0.624902	0.598	0.19	1.777e-18
DIP2B	7.92854e-23	0.620537	0.759	0.314	1.79106e-18
FGF1	8.43742e-23	0.527169	0.489	0.119	1.90601e-18
GJB1	9.19768e-23	0.475425	0.333	0.051	2.07776e-18
FDFT1	1.23838e-22	0.593419	0.667	0.238	2.7975e-18
TJP2	1.36881e-22	0.510295	0.5	0.126	3.09213e-18
PAIP2	1.52571e-22	0.528196	0.58	0.177	3.44657e-18
PLPP2	1.6531e-22	0.474208	0.402	0.078	3.73435e-18
NALCN	1.71999e-22	0.546639	0.471	0.114	3.88545e-18
MAPRE2	1.73985e-22	0.643546	0.672	0.258	3.93033e-18
RNF141	1.87493e-22	0.446185	0.42	0.087	4.23546e-18
PDE1A	2.21058e-22	0.57004	0.437	0.105	4.99369e-18
GJC2	2.28498e-22	0.433641	0.333	0.051	5.16178e-18
NPHP3	2.52044e-22	0.548231	0.454	0.112	5.69367e-18
RTL8C	2.74412e-22	0.465411	0.431	0.092	6.19896e-18
TPD52	3.13652e-22	0.566278	0.494	0.139	7.08539e-18
SHROOM4	3.19481e-22	0.510996	0.379	0.072	7.21708e-18
RASGRP3	3.58225e-22	0.510428	0.443	0.103	8.0923e-18
CPOX	3.6341e-22	0.484765	0.402	0.083	8.20944e-18
ZDHHC20	4.85504e-22	0.617427	0.511	0.146	1.09675e-17
DYNC1LI2	5.68416e-22	0.557505	0.517	0.152	1.28405e-17
SAMD4B	7.61289e-22	0.603351	0.534	0.166	1.71975e-17
CXXC5	9.31868e-22	0.545828	0.483	0.126	2.10509e-17
STOX2	9.58382e-22	0.504702	0.408	0.088	2.16498e-17
TXNIP	9.88069e-22	0.657426	0.874	0.466	2.23205e-17
RHOBTB3	9.90887e-22	0.500698	0.471	0.119	2.23841e-17
PSAT1	1.07562e-21	0.542478	0.529	0.146	2.42983e-17
ACTN4	1.10257e-21	0.556959	0.678	0.245	2.4907e-17
PFN2	1.14743e-21	0.408089	0.328	0.051	2.59204e-17
SH3GLB2	1.25615e-21	0.482735	0.414	0.088	2.83765e-17
BEX3	1.32671e-21	0.475905	0.58	0.177	2.99703e-17
MFSD6	1.39756e-21	0.462354	0.345	0.06	3.15709e-17
ZNF638	1.42639e-21	0.635245	0.649	0.242	3.22221e-17
BEX4	1.74345e-21	0.539864	0.454	0.114	3.93844e-17
GAS7	2.00135e-21	0.604186	0.575	0.19	4.52105e-17
USP11	2.00674e-21	0.473408	0.437	0.103	4.53322e-17
NAV1	2.08277e-21	0.518311	0.575	0.179	4.70499e-17
CDK19	2.20976e-21	0.594843	0.603	0.209	4.99184e-17
PPDPF	2.34818e-21	0.567243	0.563	0.177	5.30453e-17
PTP4A2	2.36994e-21	0.537212	0.799	0.334	5.35368e-17
RNF13	2.46089e-21	0.598373	0.69	0.265	5.55914e-17
ADD3	2.63538e-21	0.494644	0.552	0.164	5.95333e-17
SPARC	2.69863e-21	0.538351	0.299	0.043	6.0962e-17
PPFIA2	3.24816e-21	0.552035	0.494	0.13	7.3376e-17
KIAA1755	3.70268e-21	0.426706	0.339	0.058	8.36435e-17
TMEM184B	3.96869e-21	0.461891	0.385	0.079	8.96527e-17
NDUFS7	4.22794e-21	0.479089	0.483	0.125	9.55091e-17
ADGRB3	4.64948e-21	0.60446	0.649	0.244	1.05032e-16
CDR2L	4.74973e-21	0.38285	0.259	0.029	1.07296e-16
SERINC1	4.81512e-21	0.522377	0.684	0.26	1.08774e-16
XIST	5.21834e-21	0.559017	0.885	0.502	1.17882e-16
PHLDA3	5.35251e-21	0.434945	0.402	0.083	1.20913e-16
ATG4C	6.1523e-21	0.499425	0.517	0.144	1.3898e-16
ZFHX4	7.95973e-21	0.476933	0.397	0.085	1.7981e-16
SLC22A23	8.0135e-21	0.482909	0.523	0.146	1.81025e-16
AL358113.1	8.21646e-21	0.51311	0.5	0.139	1.8561e-16
PCDH10	8.46846e-21	0.478699	0.362	0.069	1.91303e-16
MEGF9	8.67147e-21	0.4754	0.489	0.13	1.95888e-16
INF2	1.06121e-20	0.551694	0.431	0.103	2.39727e-16
PGRMC1	1.2172e-20	0.512047	0.517	0.15	2.74965e-16
YPEL2	1.25764e-20	0.53638	0.529	0.157	2.84101e-16
ERBIN	1.32967e-20	0.616603	0.724	0.316	3.00373e-16
PTPN13	1.46364e-20	0.508766	0.425	0.105	3.30637e-16
LSS	1.51405e-20	0.432894	0.402	0.088	3.42023e-16
TULP4	1.57698e-20	0.512178	0.529	0.157	3.5624e-16
SLC5A11	1.94684e-20	0.449008	0.293	0.043	4.39792e-16
MVB12B	1.98469e-20	0.553343	0.661	0.247	4.48342e-16
CACNA2D1	2.05227e-20	0.532485	0.511	0.15	4.63607e-16
ADD1	2.25062e-20	0.607416	0.592	0.218	5.08415e-16
PLPP3	2.3694e-20	0.392298	0.379	0.078	5.35246e-16
LITAF	2.55106e-20	0.514099	0.58	0.193	5.76284e-16
GDI1	2.60074e-20	0.565042	0.649	0.245	5.87508e-16
NFIB	3.19187e-20	0.470488	0.489	0.132	7.21043e-16
PLPP1	3.24254e-20	0.56503	0.471	0.134	7.32489e-16
PRDX1	3.53196e-20	0.594086	0.569	0.206	7.97871e-16
GRID1	3.84724e-20	0.422582	0.443	0.108	8.69092e-16
PPP1R9A	4.04814e-20	0.417223	0.305	0.049	9.14475e-16
BBX	4.17859e-20	0.554696	0.718	0.303	9.43944e-16
CORO2B	4.24051e-20	0.396216	0.333	0.06	9.5793e-16
MOB3B	4.26721e-20	0.547253	0.546	0.17	9.63962e-16
PCDH17	4.36997e-20	0.466735	0.402	0.092	9.87177e-16
AMD1	4.44545e-20	0.538769	0.569	0.188	1.00423e-15
C16orf45	4.64098e-20	0.445306	0.287	0.043	1.0484e-15
CLCN4	4.6917e-20	0.42377	0.299	0.047	1.05985e-15
ZNF280D	4.71048e-20	0.476604	0.471	0.126	1.0641e-15
BEX2	6.19364e-20	0.379944	0.287	0.042	1.39914e-15
PAFAH1B1	6.20799e-20	0.543346	0.58	0.195	1.40238e-15
HEPN1	6.5888e-20	0.47872	0.374	0.078	1.48841e-15
NLGN1	6.61983e-20	0.715432	0.534	0.177	1.49542e-15
CPNE2	6.98704e-20	0.446904	0.477	0.128	1.57837e-15
TNS1	7.22687e-20	0.460372	0.379	0.083	1.63255e-15
SESTD1	7.9074e-20	0.477045	0.425	0.103	1.78628e-15
CDKN1B	8.20275e-20	0.515218	0.552	0.182	1.853e-15
MTCH1	9.06406e-20	0.49928	0.523	0.162	2.04757e-15
NINJ2	9.2345e-20	0.498545	0.408	0.096	2.08607e-15
RASGRF2	9.7053e-20	0.469371	0.402	0.094	2.19243e-15
UBBP1	9.73504e-20	0.573453	0.885	0.532	2.19915e-15
PAQR6	1.00592e-19	0.42198	0.31	0.052	2.27237e-15
ENAH	1.08117e-19	0.476238	0.454	0.119	2.44236e-15
PPM1H	1.10291e-19	0.462487	0.351	0.07	2.49148e-15
DYSF	1.16489e-19	0.507036	0.557	0.182	2.63148e-15
CDC14B	1.2996e-19	0.510479	0.523	0.164	2.9358e-15
GPHN	1.44967e-19	0.601247	0.494	0.152	3.2748e-15
YWHAE	1.69993e-19	0.478151	0.753	0.316	3.84013e-15
KLF13	1.77531e-19	0.467573	0.621	0.217	4.01043e-15
ROGDI	1.8661e-19	0.414555	0.316	0.056	4.21553e-15
MFAP3L	2.04132e-19	0.382815	0.328	0.06	4.61134e-15
ZNF365	2.0488e-19	0.427521	0.345	0.067	4.62824e-15
CLIP3	2.10389e-19	0.424371	0.402	0.092	4.75268e-15
KIF5C	2.23815e-19	0.466266	0.431	0.108	5.05597e-15
RNH1	2.46334e-19	0.475587	0.448	0.121	5.56469e-15
FAM222A	2.49826e-19	0.397948	0.391	0.087	5.64358e-15
SLC45A3	2.89024e-19	0.439282	0.282	0.043	6.52905e-15
LRP2	3.35784e-19	0.521491	0.454	0.125	7.58536e-15
SKP1	3.65812e-19	0.515949	0.615	0.224	8.26369e-15
LDOC1	3.89927e-19	0.461404	0.299	0.051	8.80846e-15
STARD9	4.14058e-19	0.389089	0.305	0.051	9.35357e-15
KLF15	4.30974e-19	0.479609	0.287	0.047	9.73571e-15
NECTIN1	4.47022e-19	0.465719	0.368	0.081	1.00982e-14
MAN2A2	4.51245e-19	0.412313	0.345	0.07	1.01936e-14
AC003659.1	4.57602e-19	0.344657	0.333	0.061	1.03372e-14
EPB41L1	4.73244e-19	0.434697	0.351	0.072	1.06906e-14
MAGI2-AS3	4.94546e-19	0.394189	0.437	0.11	1.11718e-14
FBXO32	5.26232e-19	0.549922	0.356	0.079	1.18876e-14
AC073283.3	5.40339e-19	0.455766	0.534	0.17	1.22063e-14
ATG13	5.49887e-19	0.433418	0.471	0.128	1.24219e-14
GSN	5.77311e-19	0.54162	0.776	0.356	1.30415e-14
CUEDC1	5.97916e-19	0.415189	0.345	0.07	1.35069e-14
CYP7B1	6.35637e-19	0.487427	0.42	0.106	1.4359e-14
MYLK	6.46769e-19	0.511525	0.356	0.079	1.46105e-14
ARHGEF37	6.64905e-19	0.390023	0.287	0.045	1.50202e-14
DIXDC1	6.67147e-19	0.47002	0.397	0.094	1.50708e-14
MARCH6	7.08039e-19	0.488916	0.569	0.199	1.59946e-14
SH3D19	7.53978e-19	0.469613	0.414	0.103	1.70324e-14
BRSK1	7.55546e-19	0.378905	0.305	0.052	1.70678e-14
TSC22D1	7.69338e-19	0.565144	0.517	0.175	1.73794e-14
PTMA	9.24806e-19	0.57664	0.684	0.298	2.08914e-14
SOX2	9.74742e-19	0.464091	0.328	0.063	2.20194e-14
MICAL3	1.02316e-18	0.469911	0.489	0.143	2.31133e-14
PALM2-AKAP2	1.07556e-18	0.428645	0.305	0.054	2.4297e-14
MPP2	1.09475e-18	0.406851	0.305	0.052	2.47304e-14
ATL1	1.2375e-18	0.3912	0.391	0.09	2.7955e-14
ARHGEF10	1.25616e-18	0.429145	0.287	0.047	2.83765e-14
RAB5B	1.36677e-18	0.427364	0.402	0.099	3.08752e-14
LGR5	1.47063e-18	0.412026	0.402	0.097	3.32215e-14
SLC22A15	1.50779e-18	0.451873	0.305	0.056	3.40609e-14
KIAA1958	1.57329e-18	0.470302	0.368	0.083	3.55405e-14
HECW2	1.68625e-18	0.512917	0.379	0.092	3.80924e-14
LZTS2	1.88081e-18	0.396664	0.322	0.061	4.24875e-14
IPO13	1.89631e-18	0.498386	0.385	0.096	4.28376e-14
APPBP2	1.93527e-18	0.406641	0.385	0.09	4.37178e-14
TJAP1	2.13962e-18	0.446496	0.42	0.106	4.83341e-14
TCF4	2.76043e-18	0.533429	0.805	0.406	6.23582e-14
SGCB	2.77822e-18	0.347546	0.333	0.065	6.27599e-14
SEPTIN2	2.94351e-18	0.506774	0.58	0.206	6.64939e-14
LAMP1	2.9781e-18	0.502779	0.638	0.247	6.72753e-14
FBXL7	3.00728e-18	0.50946	0.431	0.119	6.79344e-14
CTNNA1	3.24763e-18	0.4752	0.615	0.233	7.3364e-14
DHCR24	3.66159e-18	0.388889	0.351	0.074	8.27152e-14
SORCS2	3.67242e-18	0.395423	0.339	0.07	8.296e-14
PTPRF	3.80998e-18	0.416585	0.339	0.07	8.60675e-14
APBA2	3.83801e-18	0.323486	0.27	0.042	8.67007e-14
ATP9A	4.32264e-18	0.469359	0.374	0.087	9.76484e-14
SRP9	4.45725e-18	0.45471	0.42	0.114	1.00689e-13
LRRC7	4.63978e-18	0.492672	0.471	0.141	1.04813e-13
ATP6V1E1	4.71261e-18	0.446631	0.506	0.159	1.06458e-13
BNIP3	4.8699e-18	0.377626	0.408	0.101	1.10011e-13
FOXN2	4.8802e-18	0.479069	0.42	0.114	1.10244e-13
FIS1	4.88941e-18	0.393147	0.397	0.097	1.10452e-13
SHC4	4.98226e-18	0.421525	0.316	0.061	1.12549e-13
CTSF	6.0066e-18	0.47281	0.448	0.132	1.35689e-13
HNRNPA2B1	6.23754e-18	0.539458	0.816	0.431	1.40906e-13
CLIP4	6.38274e-18	0.427674	0.328	0.067	1.44186e-13
SFRP1	6.75585e-18	0.493943	0.414	0.106	1.52615e-13
PAFAH1B2	6.90197e-18	0.451415	0.489	0.15	1.55915e-13
CCSAP	6.9899e-18	0.405329	0.259	0.04	1.57902e-13
EIF1B	8.38697e-18	0.4544	0.374	0.092	1.89462e-13
ANAPC5	8.39722e-18	0.439459	0.586	0.206	1.89693e-13
NENF	8.7871e-18	0.476121	0.391	0.099	1.98501e-13
LUC7L2	9.27313e-18	0.441585	0.471	0.141	2.0948e-13
SCG5	1.00067e-17	0.402433	0.259	0.04	2.26051e-13
PON2	1.10337e-17	0.5164	0.489	0.155	2.49252e-13
USP40	1.10722e-17	0.359039	0.316	0.063	2.50121e-13
TM7SF2	1.11402e-17	0.415526	0.259	0.04	2.51658e-13
SCRG1	1.12306e-17	0.418052	0.322	0.065	2.537e-13
CYP27A1	1.14351e-17	0.400186	0.379	0.088	2.5832e-13
MPC1	1.2531e-17	0.452479	0.523	0.173	2.83076e-13
LINC01608	1.27372e-17	0.415071	0.333	0.07	2.87734e-13
NLGN2	1.34603e-17	0.453586	0.31	0.061	3.04068e-13
LRRC8B	1.3615e-17	0.412538	0.425	0.116	3.07563e-13
VEZF1	1.3965e-17	0.454423	0.466	0.137	3.1547e-13
TMEM235	1.66368e-17	0.459798	0.328	0.069	3.75825e-13
MEGF10	1.67399e-17	0.50466	0.362	0.087	3.78155e-13
SFT2D1	1.77828e-17	0.383459	0.408	0.106	4.01714e-13
BBS2	1.82513e-17	0.409335	0.379	0.092	4.12296e-13
TYMSOS	1.82695e-17	0.35974	0.287	0.051	4.12709e-13
KLF9	1.87838e-17	0.437474	0.402	0.105	4.24326e-13
PREPL	1.96658e-17	0.419667	0.391	0.099	4.4425e-13
GLG1	2.17494e-17	0.531769	0.506	0.17	4.91319e-13
PIK3C2B	2.32119e-17	0.382257	0.408	0.103	5.24358e-13
GRAMD2B	2.42045e-17	0.446268	0.345	0.079	5.46779e-13
NFIA	2.44862e-17	0.581324	0.661	0.296	5.53144e-13
KIAA1324L	2.68806e-17	0.412628	0.287	0.052	6.07233e-13
MATR3	2.84879e-17	0.46164	0.494	0.166	6.43541e-13
C21orf91	2.90003e-17	0.402333	0.408	0.108	6.55118e-13
SEMA4D	3.21412e-17	0.485707	0.701	0.312	7.26071e-13
ITCH	3.34943e-17	0.403982	0.42	0.114	7.56637e-13
SEC11C	3.73608e-17	0.452636	0.345	0.083	8.4398e-13
ACER3	3.86561e-17	0.383113	0.494	0.153	8.73242e-13
KIZ	4.15418e-17	0.437639	0.414	0.116	9.38429e-13
DDX17	4.18379e-17	0.494056	0.851	0.489	9.45118e-13
GABARAPL2	4.4077e-17	0.466086	0.586	0.218	9.95699e-13
PACS2	4.42631e-17	0.446983	0.523	0.173	9.99904e-13
LGALS3BP	4.62718e-17	0.43692	0.425	0.119	1.04528e-12
RYR2	4.73822e-17	0.491218	0.351	0.085	1.07036e-12
NTRK2	4.82077e-17	0.403526	0.414	0.11	1.08901e-12
PPP2CB	4.8613e-17	0.473213	0.494	0.164	1.09817e-12
EIF1	5.08851e-17	0.451846	0.943	0.542	1.14949e-12
GRHPR	5.17019e-17	0.400681	0.42	0.117	1.16795e-12
EFNA1	5.249e-17	0.306191	0.264	0.042	1.18575e-12
NCKAP5	5.26803e-17	0.650566	0.592	0.255	1.19005e-12
ARHGEF2	5.33026e-17	0.43727	0.603	0.235	1.20411e-12
AC004925.1	5.33732e-17	0.379377	0.287	0.052	1.2057e-12
NDFIP2	5.47421e-17	0.366252	0.293	0.054	1.23662e-12
FUS	5.50976e-17	0.459921	0.569	0.211	1.24466e-12
TNRC6C	5.56936e-17	0.489282	0.46	0.143	1.25812e-12
REEP3	5.59422e-17	0.443434	0.471	0.144	1.26374e-12
TRIM9	5.60893e-17	0.426664	0.339	0.078	1.26706e-12
C18orf32	5.9201e-17	0.460843	0.397	0.108	1.33735e-12
DICER1	6.19647e-17	0.404516	0.466	0.141	1.39978e-12
TLE4	6.2266e-17	0.446585	0.523	0.177	1.40659e-12
WHRN	6.26906e-17	0.410387	0.431	0.123	1.41618e-12
LIPA	6.51138e-17	0.450621	0.695	0.3	1.47092e-12
SIK2	6.62455e-17	0.47016	0.437	0.13	1.49649e-12
STXBP3	7.37759e-17	0.454902	0.46	0.144	1.6666e-12
COX5B	7.57383e-17	0.457371	0.546	0.195	1.71093e-12
BACH2	7.58787e-17	0.462146	0.362	0.09	1.7141e-12
ANKRD18A	8.15316e-17	0.424132	0.316	0.067	1.8418e-12
EPN2	8.62317e-17	0.420722	0.494	0.157	1.94797e-12
ZNF281	8.76623e-17	0.380504	0.362	0.085	1.98029e-12
OAT	8.78088e-17	0.357798	0.397	0.105	1.9836e-12
SLC6A9	8.8731e-17	0.388966	0.31	0.063	2.00443e-12
DOCK3	9.09086e-17	0.444899	0.356	0.087	2.05362e-12
DCTN1	9.10723e-17	0.493181	0.46	0.146	2.05732e-12
ANKRD28	9.82789e-17	0.384791	0.368	0.09	2.22012e-12
LMBRD1	1.02013e-16	0.489035	0.511	0.181	2.30448e-12
SOBP	1.02038e-16	0.41307	0.31	0.065	2.30503e-12
AHI1	1.18902e-16	0.409572	0.379	0.101	2.68599e-12
RHBDD2	1.44513e-16	0.399733	0.293	0.06	3.26456e-12
TACC1	1.51257e-16	0.463237	0.632	0.265	3.4169e-12
CRBN	1.57582e-16	0.340507	0.351	0.083	3.55977e-12
PTPN11	1.60069e-16	0.449469	0.333	0.081	3.61596e-12
UBBP2	1.62504e-16	0.492231	0.678	0.303	3.67096e-12
SEC14L5	1.71026e-16	0.467619	0.362	0.094	3.86348e-12
PPP2R3A	1.95167e-16	0.401882	0.299	0.061	4.40883e-12
LINC00632	1.99436e-16	0.388943	0.356	0.088	4.50527e-12
RHOB	2.10205e-16	0.379412	0.575	0.202	4.74853e-12
AC093010.3	2.11696e-16	0.462921	0.42	0.121	4.78222e-12
RAD21	2.18572e-16	0.491139	0.471	0.153	4.93755e-12
TMEM106B	2.82703e-16	0.380612	0.351	0.085	6.38627e-12
ZFYVE16	2.84679e-16	0.438259	0.397	0.112	6.43089e-12
ARL2	3.62263e-16	0.334606	0.299	0.061	8.18352e-12
THBS2	3.75456e-16	0.390136	0.259	0.045	8.48154e-12
RGL1	3.93179e-16	0.416752	0.379	0.101	8.88191e-12
FMC1-LUC7L2	4.14377e-16	0.300936	0.293	0.058	9.36077e-12
PNPT1	4.22162e-16	0.380391	0.368	0.094	9.53664e-12
RTF2	4.22696e-16	0.448334	0.379	0.105	9.5487e-12
TCF12	4.50038e-16	0.546105	0.753	0.386	1.01664e-11
CYB5R3	4.79897e-16	0.433543	0.448	0.141	1.08409e-11
PCMT1	4.81687e-16	0.348756	0.379	0.099	1.08813e-11
HINT1	5.17675e-16	0.440164	0.511	0.181	1.16943e-11
AC138409.2	5.29485e-16	0.399338	0.385	0.105	1.19611e-11
EXOC6B	5.39747e-16	0.433993	0.517	0.184	1.21929e-11
ARL8A	5.93604e-16	0.421619	0.483	0.159	1.34095e-11
ATXN1	6.23312e-16	0.475499	0.724	0.338	1.40806e-11
SAR1B	6.37175e-16	0.424248	0.362	0.094	1.43938e-11
ZNF462	6.84539e-16	0.346592	0.282	0.056	1.54637e-11
ZNF652	7.53471e-16	0.461539	0.506	0.181	1.70209e-11
LUC7L3	7.85666e-16	0.51183	0.753	0.383	1.77482e-11
TCEAL7	7.93137e-16	0.353922	0.316	0.069	1.7917e-11
NPC1	8.12782e-16	0.447808	0.529	0.191	1.83607e-11
HINT3	8.7677e-16	0.339634	0.345	0.083	1.98062e-11
RICTOR	8.7867e-16	0.354685	0.454	0.143	1.98492e-11
EMC10	8.97455e-16	0.447535	0.414	0.128	2.02735e-11
IQGAP1	9.81741e-16	0.394914	0.448	0.137	2.21775e-11
ENO2	9.8872e-16	0.343027	0.328	0.076	2.23352e-11
SHISA4	1.01961e-15	0.363774	0.27	0.051	2.30331e-11
FADS1	1.03668e-15	0.432827	0.454	0.141	2.34186e-11
TMEM125	1.04035e-15	0.417885	0.322	0.074	2.35016e-11
LRRC1	1.16332e-15	0.475637	0.356	0.094	2.62793e-11
HMGB1	1.35474e-15	0.420503	0.575	0.218	3.06035e-11
ADCY5	1.35908e-15	0.387214	0.322	0.074	3.07016e-11
DTX3	1.39832e-15	0.397186	0.276	0.056	3.15881e-11
HDAC2-AS2	1.48545e-15	0.402436	0.402	0.119	3.35563e-11
HBS1L	1.53188e-15	0.361547	0.385	0.105	3.46053e-11
SPART	1.57477e-15	0.385633	0.356	0.092	3.55742e-11
STXBP6	1.59577e-15	0.417691	0.322	0.078	3.60485e-11
KIF3A	1.59625e-15	0.322203	0.299	0.063	3.60594e-11
KLHL42	1.69215e-15	0.370335	0.293	0.061	3.82257e-11
GATM	1.806e-15	0.466129	0.483	0.17	4.07975e-11
TSPAN3	1.85459e-15	0.392649	0.443	0.139	4.18951e-11
RALGAPA1	1.93102e-15	0.347283	0.397	0.114	4.36218e-11
ZNF608	1.96744e-15	0.399415	0.299	0.065	4.44445e-11
PSD3	1.96995e-15	0.519246	0.46	0.157	4.45012e-11
MID1IP1	2.02137e-15	0.470469	0.546	0.199	4.56627e-11
PRKAR1A	2.06218e-15	0.439818	0.569	0.227	4.65848e-11
INSR	2.08122e-15	0.395107	0.517	0.184	4.70148e-11
NPIPB2	2.27303e-15	0.428331	0.839	0.484	5.13478e-11
GIT1	2.32126e-15	0.369807	0.362	0.096	5.24373e-11
FCHO1	2.39099e-15	0.358096	0.351	0.09	5.40125e-11
CTTN	2.41071e-15	0.335825	0.333	0.079	5.44579e-11
CHCHD2	2.67927e-15	0.430512	0.615	0.255	6.05248e-11
COL9A3	2.6893e-15	0.359731	0.385	0.105	6.07514e-11
SPAG9	2.69598e-15	0.395846	0.569	0.218	6.09022e-11
DIPK1A	2.82084e-15	0.332501	0.402	0.116	6.37227e-11
SGK3	2.89148e-15	0.486581	0.546	0.213	6.53186e-11
AC019257.8	2.9289e-15	0.363781	0.264	0.051	6.61638e-11
KIF13A	2.96276e-15	0.43616	0.471	0.161	6.69288e-11
EMC2	3.04751e-15	0.385442	0.379	0.105	6.88432e-11
C12orf76	3.10273e-15	0.436343	0.356	0.096	7.00907e-11
EVA1C	3.18159e-15	0.427353	0.328	0.081	7.1872e-11
SERINC3	3.22744e-15	0.444339	0.448	0.15	7.29078e-11
MPP5	3.34993e-15	0.316365	0.31	0.07	7.56749e-11
GREM1	3.46343e-15	0.298875	0.339	0.081	7.82388e-11
BNIP3L	3.48431e-15	0.432945	0.557	0.224	7.87107e-11
SHROOM1	3.60304e-15	0.350871	0.287	0.061	8.13926e-11
LDLRAP1	3.96386e-15	0.352396	0.264	0.052	8.95437e-11
CXADR	4.24721e-15	0.335385	0.316	0.074	9.59445e-11
ITPKB	4.27715e-15	0.479376	0.448	0.153	9.66207e-11
PPP2R2A	4.4316e-15	0.407095	0.466	0.161	1.0011e-10
ITPK1	5.06382e-15	0.373184	0.494	0.171	1.14392e-10
C1orf122	5.13254e-15	0.379206	0.391	0.114	1.15944e-10
TMEM245	5.18548e-15	0.372177	0.414	0.126	1.1714e-10
PHGDH	5.31688e-15	0.439459	0.339	0.087	1.20108e-10
PLD1	5.34643e-15	0.336962	0.368	0.099	1.20776e-10
CHN2	5.3556e-15	0.478766	0.552	0.217	1.20983e-10
PPA1	5.92451e-15	0.440012	0.448	0.15	1.33835e-10
MORF4L2	5.94118e-15	0.383277	0.448	0.144	1.34211e-10
DUSP7	6.01159e-15	0.346142	0.299	0.069	1.35802e-10
MTURN	6.24593e-15	0.358444	0.379	0.106	1.41096e-10
POU3F3	6.26221e-15	0.401782	0.356	0.094	1.41463e-10
IVNS1ABP	6.44452e-15	0.350083	0.379	0.105	1.45582e-10
ELMO2	6.50481e-15	0.352481	0.253	0.049	1.46944e-10
TSPAN15	6.91249e-15	0.327542	0.27	0.054	1.56153e-10
AL591895.1	7.36971e-15	0.390364	0.351	0.096	1.66482e-10
UBR3	7.8261e-15	0.419364	0.391	0.117	1.76791e-10
GPSM2	7.8546e-15	0.318597	0.264	0.052	1.77435e-10
RPS6KA5	7.85584e-15	0.398444	0.397	0.117	1.77464e-10
ABHD6	7.86061e-15	0.329591	0.31	0.072	1.77571e-10
SGCE	8.21272e-15	0.380924	0.333	0.085	1.85525e-10
SOGA1	8.29944e-15	0.36966	0.368	0.103	1.87484e-10
YIPF4	8.46195e-15	0.365569	0.408	0.125	1.91155e-10
SH3BP4	8.74797e-15	0.438144	0.322	0.081	1.97617e-10
FAF1	9.23852e-15	0.381132	0.517	0.186	2.08698e-10
USP32	9.82209e-15	0.4011	0.402	0.126	2.21881e-10
TECPR2	9.92097e-15	0.394369	0.356	0.097	2.24115e-10
FBXO7	1.0721e-14	0.40644	0.385	0.117	2.42186e-10
HIBCH	1.11918e-14	0.328011	0.299	0.069	2.52822e-10
CLPTM1	1.15449e-14	0.329005	0.345	0.092	2.60799e-10
MAU2	1.15554e-14	0.357625	0.379	0.108	2.61036e-10
YPEL3	1.1676e-14	0.465778	0.586	0.255	2.6376e-10
DLC1	1.22456e-14	0.421974	0.397	0.121	2.76627e-10
PUF60	1.22818e-14	0.291077	0.287	0.061	2.77447e-10
SDHA	1.26171e-14	0.363348	0.351	0.097	2.8502e-10
EPHX1	1.27785e-14	0.32225	0.27	0.056	2.88667e-10
TOB2	1.29664e-14	0.404359	0.397	0.119	2.92911e-10
TMEM87A	1.33346e-14	0.40413	0.563	0.22	3.0123e-10
PPP1R12B	1.52371e-14	0.460861	0.402	0.128	3.44207e-10
ASTN2	1.56334e-14	0.379449	0.333	0.09	3.53158e-10
PRKCSH	1.57986e-14	0.399296	0.454	0.157	3.56889e-10
MOSPD2	1.70613e-14	0.366565	0.27	0.058	3.85415e-10
CCNH	1.72286e-14	0.468104	0.598	0.258	3.89194e-10
DIPK2A	1.78068e-14	0.279281	0.379	0.106	4.02255e-10
SEMA6D	1.85216e-14	0.35507	0.443	0.146	4.18404e-10
SLC4A8	1.90431e-14	0.384415	0.276	0.06	4.30184e-10
WNK1	1.96852e-14	0.412488	0.569	0.238	4.44689e-10
ELL2	1.99054e-14	0.31727	0.575	0.227	4.49663e-10
PLIN3	2.01233e-14	0.339573	0.305	0.072	4.54586e-10
PROX1	2.20628e-14	0.347317	0.368	0.103	4.98398e-10
SGIP1	2.32514e-14	0.380478	0.27	0.058	5.25249e-10
PPM1K	2.64135e-14	0.453782	0.448	0.155	5.9668e-10
TMEM123	2.72748e-14	0.402294	0.483	0.171	6.16137e-10
FAAH	2.75131e-14	0.324814	0.31	0.076	6.21522e-10
SEC62	2.88314e-14	0.460079	0.575	0.247	6.513e-10
FOXO1	2.9143e-14	0.390043	0.431	0.141	6.58341e-10
RNF5	2.97775e-14	0.370914	0.345	0.097	6.72675e-10
CLCN3	2.98528e-14	0.335335	0.351	0.096	6.74375e-10
UBE2R2	3.05359e-14	0.390003	0.511	0.186	6.89805e-10
CD47	3.06728e-14	0.465516	0.523	0.202	6.92899e-10
NCOA6	3.1124e-14	0.341624	0.316	0.081	7.03091e-10
ST3GAL5	3.18773e-14	0.379452	0.379	0.112	7.20108e-10
KIF6	3.21847e-14	0.367341	0.362	0.099	7.27052e-10
MARCH1	3.2473e-14	0.480333	0.586	0.255	7.33565e-10
OSBP2	3.27857e-14	0.344323	0.282	0.063	7.4063e-10
ERBB4	3.30807e-14	0.451664	0.54	0.211	7.47294e-10
BPTF	3.31157e-14	0.458324	0.598	0.278	7.48083e-10
AC004593.3	3.31632e-14	0.46494	0.534	0.211	7.49156e-10
DOCK1	3.74527e-14	0.332318	0.345	0.094	8.46057e-10
PAPSS1	3.83888e-14	0.373133	0.345	0.096	8.67202e-10
KANK1	3.95678e-14	0.496858	0.368	0.11	8.93838e-10
MYO1E	4.05211e-14	0.416004	0.523	0.199	9.15371e-10
ZNF704	4.30408e-14	0.408681	0.351	0.097	9.72292e-10
TRA2A	4.31838e-14	0.410053	0.534	0.215	9.75522e-10
CALD1	4.32042e-14	0.393316	0.448	0.148	9.75982e-10
PDK4	4.35453e-14	0.415698	0.58	0.238	9.83689e-10
USP31	4.5054e-14	0.31625	0.276	0.061	1.01777e-09
KAT2B	4.61668e-14	0.477134	0.5	0.195	1.04291e-09
MAGEH1	4.6941e-14	0.333046	0.287	0.067	1.0604e-09
KAZN	4.77287e-14	0.390686	0.448	0.162	1.07819e-09
ELOVL7	5.06098e-14	0.329562	0.253	0.051	1.14327e-09
ZKSCAN1	5.50891e-14	0.427649	0.489	0.182	1.24446e-09
GCLC	5.97966e-14	0.406165	0.368	0.114	1.35081e-09
KLHL24	6.06895e-14	0.436531	0.517	0.204	1.37098e-09
ATG2B	6.15185e-14	0.282828	0.253	0.051	1.3897e-09
TMEM258	6.45391e-14	0.399283	0.443	0.153	1.45794e-09
ARNT2	6.50813e-14	0.321014	0.282	0.063	1.47019e-09
ARHGEF7	6.92027e-14	0.380996	0.437	0.152	1.56329e-09
CDK17	7.07288e-14	0.320597	0.402	0.125	1.59776e-09
TMED10	7.17475e-14	0.434635	0.552	0.229	1.62078e-09
FAN1	7.42751e-14	0.288312	0.259	0.054	1.67788e-09
CPEB2	7.47752e-14	0.391394	0.46	0.159	1.68917e-09
DAD1	8.10375e-14	0.38596	0.431	0.141	1.83064e-09
TMED7	8.15106e-14	0.389945	0.31	0.081	1.84132e-09
USP47	8.17364e-14	0.3688	0.42	0.135	1.84643e-09
SCCPDH	8.88059e-14	0.349871	0.287	0.069	2.00613e-09
NCOA7	8.90421e-14	0.383257	0.443	0.152	2.01146e-09
WWOX	9.41875e-14	0.577637	0.736	0.406	2.12769e-09
TPTEP2-CSNK1E	9.61255e-14	0.387331	0.31	0.083	2.17148e-09
ZHX2	9.7864e-14	0.412548	0.437	0.155	2.21075e-09
SRSF5	1.03285e-13	0.439583	0.603	0.283	2.3332e-09
ANKRD36C	1.08766e-13	0.355273	0.374	0.112	2.45702e-09
MAGT1	1.10953e-13	0.409409	0.287	0.072	2.50644e-09
PRKCQ	1.16015e-13	0.291816	0.253	0.052	2.62078e-09
HGS	1.21298e-13	0.32665	0.259	0.056	2.74013e-09
RUFY2	1.23873e-13	0.338987	0.299	0.074	2.79828e-09
ARIH2	1.24026e-13	0.403257	0.437	0.153	2.80175e-09
NASP	1.24217e-13	0.38786	0.385	0.121	2.80606e-09
ACTG1	1.28725e-13	0.437563	0.799	0.451	2.9079e-09
EPS15	1.30132e-13	0.471469	0.529	0.218	2.93969e-09
TTLL11	1.31236e-13	0.347615	0.276	0.063	2.96461e-09
MACF1	1.32203e-13	0.375996	0.661	0.303	2.98646e-09
MAP1LC3B	1.39478e-13	0.412271	0.471	0.17	3.1508e-09
ZNF493	1.40465e-13	0.292617	0.259	0.056	3.17311e-09
TSG101	1.44388e-13	0.346577	0.592	0.236	3.26172e-09
USP48	1.48521e-13	0.339748	0.362	0.108	3.35509e-09
SCOC	1.54129e-13	0.305708	0.316	0.083	3.48178e-09
KIF2A	1.54984e-13	0.411888	0.483	0.186	3.50109e-09
CRTC3	1.62993e-13	0.364903	0.27	0.061	3.682e-09
FAM53B	1.72879e-13	0.378921	0.374	0.119	3.90533e-09
POLR2G	1.90359e-13	0.304933	0.259	0.056	4.30022e-09
FIGN	2.47427e-13	0.372151	0.27	0.065	5.58937e-09
ZMYM2	2.47527e-13	0.39407	0.437	0.153	5.59163e-09
POGZ	2.48393e-13	0.358731	0.431	0.144	5.61119e-09
GRIA2	2.4935e-13	0.392211	0.259	0.058	5.63282e-09
TRAPPC12	2.63344e-13	0.326226	0.328	0.09	5.94894e-09
ZIC1	2.82579e-13	0.30752	0.259	0.056	6.38346e-09
AIF1L	2.84333e-13	0.296366	0.293	0.072	6.42309e-09
ALKBH5	2.85417e-13	0.379137	0.374	0.117	6.44757e-09
TMBIM6	2.88738e-13	0.454114	0.851	0.507	6.52258e-09
KIF19	3.13915e-13	0.336651	0.259	0.058	7.09135e-09
KDM6A	3.29611e-13	0.347291	0.431	0.15	7.44591e-09
OCIAD1	3.51203e-13	0.379427	0.511	0.204	7.93368e-09
TMEM30A	3.60008e-13	0.311148	0.402	0.132	8.13257e-09
VRK2	3.60721e-13	0.38021	0.374	0.117	8.14869e-09
PPP1CC	3.61288e-13	0.357396	0.345	0.103	8.16149e-09
STRN	3.64577e-13	0.436343	0.374	0.123	8.2358e-09
EFS	3.65636e-13	0.313497	0.282	0.067	8.25972e-09
AUTS2	3.83062e-13	0.461824	0.707	0.377	8.65337e-09
IGSF11	4.05849e-13	0.333296	0.316	0.085	9.16812e-09
RAB11B	4.24648e-13	0.403245	0.414	0.141	9.5928e-09
DYNC1I2	4.31234e-13	0.342358	0.443	0.153	9.74157e-09
FBXL3	4.33351e-13	0.36831	0.322	0.09	9.78941e-09
SMARCA5	4.4129e-13	0.335842	0.339	0.101	9.96875e-09
SNX30	4.56771e-13	0.320238	0.351	0.103	1.03184e-08
ELF2	4.64471e-13	0.390901	0.431	0.153	1.04924e-08
VPS35L	4.83102e-13	0.318581	0.351	0.105	1.09133e-08
TERF2IP	5.01994e-13	0.410209	0.506	0.2	1.134e-08
NT5DC1	5.14043e-13	0.333167	0.362	0.112	1.16122e-08
PANTR1	5.27388e-13	0.33473	0.276	0.067	1.19137e-08
PSAP	5.32202e-13	0.32623	0.908	0.554	1.20224e-08
LINC01578	5.47306e-13	0.384852	0.523	0.213	1.23636e-08
CPD	5.61545e-13	0.357521	0.293	0.076	1.26853e-08
ZNF644	6.31309e-13	0.321845	0.397	0.132	1.42613e-08
ATXN2	6.55396e-13	0.38419	0.489	0.19	1.48054e-08
RMND5A	7.35264e-13	0.386032	0.351	0.108	1.66096e-08
XPO6	7.71788e-13	0.319179	0.454	0.155	1.74347e-08
WDR59	7.80922e-13	0.344056	0.328	0.096	1.7641e-08
HNRNPC	8.31025e-13	0.43174	0.546	0.238	1.87729e-08
AHSA2P	8.52529e-13	0.329449	0.489	0.186	1.92586e-08
NDUFB9	8.69256e-13	0.304874	0.356	0.106	1.96365e-08
GDE1	8.96462e-13	0.301864	0.287	0.074	2.02511e-08
UNC5B	9.33797e-13	0.468804	0.391	0.135	2.10945e-08
YWHAB	9.55655e-13	0.388555	0.747	0.415	2.15882e-08
GRIA4	9.59573e-13	0.376422	0.287	0.074	2.16767e-08
NORAD	9.87909e-13	0.314522	0.379	0.119	2.23169e-08
TALDO1	1.00975e-12	0.403988	0.42	0.152	2.28102e-08
ANKRD12	1.05213e-12	0.367066	0.546	0.22	2.37676e-08
RIF1	1.14525e-12	0.331117	0.385	0.126	2.58712e-08
PKD1	1.17294e-12	0.262595	0.264	0.061	2.64967e-08
IQSEC1	1.18263e-12	0.289334	0.264	0.063	2.67157e-08
PPFIBP1	1.20224e-12	0.359869	0.264	0.063	2.71587e-08
FAM177A1	1.21962e-12	0.285886	0.27	0.065	2.75511e-08
ZC3H6	1.25136e-12	0.301008	0.305	0.083	2.82683e-08
RNF103	1.25388e-12	0.339589	0.282	0.07	2.83251e-08
FAR1	1.27021e-12	0.40688	0.529	0.229	2.86941e-08
GABARAPL1	1.27089e-12	0.339421	0.322	0.094	2.87095e-08
PARP1	1.27315e-12	0.29251	0.339	0.099	2.87605e-08
HP1BP3	1.34177e-12	0.377984	0.598	0.271	3.03105e-08
ELOVL5	1.46082e-12	0.383869	0.362	0.117	3.3e-08
DNAJA1	1.47809e-12	0.307959	0.494	0.191	3.33901e-08
KHSRP	1.54973e-12	0.342344	0.356	0.114	3.50083e-08
NOMO1	1.57817e-12	0.30796	0.264	0.065	3.56509e-08
ACTR1B	1.60946e-12	0.323856	0.282	0.072	3.63576e-08
WDR20	1.63225e-12	0.325912	0.299	0.081	3.68725e-08
JAKMIP2	1.64101e-12	0.335499	0.287	0.078	3.70704e-08
MDH1	1.86999e-12	0.264302	0.31	0.085	4.2243e-08
ANKRD40	1.87096e-12	0.315287	0.328	0.097	4.22651e-08
SYPL1	1.96885e-12	0.349621	0.385	0.126	4.44764e-08
PSIP1	2.0182e-12	0.282497	0.299	0.079	4.55911e-08
PSMB4	2.09599e-12	0.343416	0.402	0.137	4.73485e-08
CD99L2	2.10422e-12	0.293165	0.27	0.067	4.75343e-08
RFFL	2.20419e-12	0.343103	0.385	0.126	4.97926e-08
TCEAL4	2.32308e-12	0.275144	0.259	0.061	5.24783e-08
CD82	2.39507e-12	0.358254	0.293	0.079	5.41047e-08
HID1	2.49809e-12	0.304427	0.276	0.069	5.64319e-08
LRRFIP2	2.54406e-12	0.332591	0.345	0.106	5.74704e-08
RANGAP1	2.64277e-12	0.290057	0.305	0.085	5.97002e-08
ROBO1	2.72063e-12	0.327806	0.402	0.139	6.1459e-08
TMX2	2.72229e-12	0.303716	0.282	0.072	6.14965e-08
REEP5	2.86127e-12	0.331032	0.408	0.144	6.46361e-08
PTGES3	2.9131e-12	0.42663	0.575	0.273	6.58069e-08
MYO18A	3.28521e-12	0.348653	0.477	0.186	7.4213e-08
PPM1B	3.32946e-12	0.34454	0.46	0.171	7.52126e-08
ENOPH1	3.43211e-12	0.352931	0.299	0.085	7.75314e-08
KIAA1109	3.92378e-12	0.357014	0.477	0.188	8.86383e-08
TMEM41B	4.35289e-12	0.287522	0.282	0.074	9.83318e-08
SUCLG1	4.36691e-12	0.34477	0.322	0.096	9.86486e-08
GIPC1	4.63109e-12	0.278387	0.27	0.069	1.04616e-07
DEPTOR	5.00153e-12	0.330012	0.385	0.132	1.12985e-07
DYNLL2	5.37324e-12	0.393074	0.356	0.119	1.21381e-07
SLC25A13	5.55458e-12	0.331797	0.431	0.157	1.25478e-07
N4BP2L2	5.66949e-12	0.427076	0.644	0.323	1.28074e-07
HNRNPL	5.91884e-12	0.371286	0.42	0.159	1.33707e-07
SREBF1	6.05336e-12	0.33584	0.391	0.135	1.36745e-07
ACYP2	6.25252e-12	0.314985	0.351	0.112	1.41244e-07
RO60	6.85406e-12	0.328462	0.391	0.137	1.54833e-07
SNX3	6.9219e-12	0.3971	0.483	0.199	1.56366e-07
FXR1	6.95847e-12	0.350765	0.374	0.13	1.57192e-07
GNPTG	7.20634e-12	0.350046	0.431	0.161	1.62791e-07
MON2	7.39619e-12	0.344725	0.385	0.134	1.6708e-07
KMT2A	7.47131e-12	0.406214	0.477	0.195	1.68777e-07
ST13	7.76375e-12	0.312726	0.391	0.137	1.75383e-07
RAB4B	7.92657e-12	0.347018	0.287	0.081	1.79061e-07
FASN	8.14399e-12	0.313188	0.328	0.099	1.83973e-07
ZFR	8.33347e-12	0.346455	0.443	0.168	1.88253e-07
SENP5	8.3621e-12	0.318715	0.333	0.105	1.889e-07
ARID4B	8.59028e-12	0.386821	0.552	0.245	1.94055e-07
MAVS	8.62008e-12	0.316778	0.282	0.078	1.94728e-07
TNIK	8.75291e-12	0.370827	0.339	0.108	1.97728e-07
LRCH3	8.93513e-12	0.383103	0.397	0.146	2.01845e-07
SLF2	8.96446e-12	0.310875	0.287	0.081	2.02507e-07
HNRNPU	9.10305e-12	0.34128	0.655	0.332	2.05638e-07
BCAS3	9.18892e-12	0.440019	0.517	0.231	2.07578e-07
PLPPR1	9.25512e-12	0.326533	0.253	0.063	2.09073e-07
ATP11A	9.36228e-12	0.34679	0.448	0.173	2.11494e-07
ARID5B	9.63564e-12	0.353506	0.374	0.13	2.17669e-07
DYNC1H1	9.74295e-12	0.381548	0.523	0.229	2.20093e-07
ALDH3A2	9.8153e-12	0.308305	0.276	0.072	2.21728e-07
DSTN	9.82088e-12	0.297077	0.391	0.134	2.21854e-07
RDH11	1.00944e-11	0.28605	0.408	0.143	2.28033e-07
GSTP1	1.02135e-11	0.316968	0.454	0.17	2.30722e-07
AIG1	1.08017e-11	0.318776	0.374	0.132	2.44012e-07
TIAF1	1.08302e-11	0.294535	0.42	0.148	2.44655e-07
PWWP2A	1.1312e-11	0.267632	0.305	0.087	2.55539e-07
COX7A2	1.17008e-11	0.306156	0.443	0.166	2.64321e-07
GRIN2A	1.19712e-11	0.321908	0.293	0.085	2.7043e-07
COL9A2	1.21212e-11	0.411867	0.414	0.153	2.73819e-07
ABI2	1.24519e-11	0.315884	0.282	0.078	2.81287e-07
AGAP3	1.28905e-11	0.294407	0.402	0.139	2.91196e-07
FAM219A	1.38982e-11	0.307327	0.27	0.072	3.13961e-07
MIA-RAB4B	1.39497e-11	0.347395	0.287	0.083	3.15124e-07
AZGP1	1.50075e-11	0.335091	0.287	0.079	3.3902e-07
CD46	1.65942e-11	0.313476	0.368	0.126	3.74862e-07
SLC25A4	1.71682e-11	0.284758	0.259	0.067	3.87829e-07
LINC00882	1.74388e-11	0.369367	0.264	0.07	3.93943e-07
RASSF4	1.77046e-11	0.332318	0.466	0.186	3.99946e-07
RNF10	1.83483e-11	0.290833	0.299	0.088	4.14489e-07
DPF2	1.86616e-11	0.29641	0.27	0.074	4.21565e-07
CEP290	1.94867e-11	0.27975	0.27	0.072	4.40205e-07
MRPS5	2.00463e-11	0.31056	0.345	0.112	4.52845e-07
AC016597.1	2.13676e-11	0.254173	0.259	0.065	4.82693e-07
NDUFS6	2.17551e-11	0.274201	0.287	0.081	4.91447e-07
TNRC6B	2.22843e-11	0.35808	0.534	0.238	5.03403e-07
ALDH6A1	2.3651e-11	0.303649	0.362	0.123	5.34275e-07
KAT6A	2.37743e-11	0.374401	0.414	0.157	5.37062e-07
PSMB7	2.40446e-11	0.275624	0.305	0.092	5.43168e-07
PSMD8	2.51424e-11	0.354271	0.27	0.076	5.67968e-07
GSTO1	2.59166e-11	0.28159	0.339	0.11	5.85456e-07
SARAF	2.84465e-11	0.319583	0.638	0.321	6.42606e-07
PLEKHA1	2.86555e-11	0.289513	0.322	0.099	6.47329e-07
PHF19	2.87947e-11	0.25536	0.253	0.065	6.50472e-07
PPP1R3E	2.95425e-11	0.357247	0.339	0.114	6.67364e-07
RAB7A	3.18785e-11	0.306535	0.546	0.231	7.20136e-07
KTN1	3.20383e-11	0.329917	0.54	0.235	7.23745e-07
CHMP5	3.39066e-11	0.282273	0.305	0.09	7.6595e-07
AFDN	3.40689e-11	0.29029	0.27	0.074	7.69617e-07
CSNK1E	3.4751e-11	0.351694	0.391	0.143	7.85025e-07
ARGLU1	3.53991e-11	0.341054	0.58	0.265	7.99666e-07
RNF130	3.96382e-11	0.284729	0.701	0.341	8.95427e-07
SPTLC2	4.01754e-11	0.344356	0.529	0.235	9.07563e-07
ANKH	4.1543e-11	0.345207	0.425	0.161	9.38456e-07
CNDP2	4.70732e-11	0.352804	0.379	0.139	1.06338e-06
SF1	4.86785e-11	0.347503	0.517	0.233	1.09965e-06
DDX24	5.07225e-11	0.300527	0.374	0.132	1.14582e-06
POGK	5.43932e-11	0.315272	0.293	0.088	1.22874e-06
LINC01170	5.54708e-11	0.317963	0.276	0.079	1.25309e-06
RHOA	5.62517e-11	0.340012	0.615	0.309	1.27072e-06
RTL8A	5.92639e-11	0.258914	0.264	0.072	1.33877e-06
WRB	5.97586e-11	0.278475	0.345	0.112	1.34995e-06
MFF	6.1956e-11	0.258993	0.339	0.114	1.39959e-06
C4orf48	6.4599e-11	0.28715	0.333	0.108	1.45929e-06
HNRNPR	6.60695e-11	0.311944	0.362	0.128	1.49251e-06
DMD	6.85988e-11	0.341575	0.517	0.229	1.54965e-06
ARPP19	7.07803e-11	0.306982	0.425	0.164	1.59893e-06
PHIP	7.10468e-11	0.423664	0.672	0.37	1.60495e-06
TM9SF3	7.35393e-11	0.375973	0.408	0.157	1.66125e-06
EI24	7.58988e-11	0.332652	0.333	0.112	1.71455e-06
CHTOP	8.11154e-11	0.276283	0.259	0.07	1.8324e-06
RBBP4	8.22164e-11	0.307861	0.293	0.09	1.85727e-06
PPIA	8.50889e-11	0.329529	0.655	0.323	1.92216e-06
EIF1AX	8.86941e-11	0.358463	0.483	0.204	2.0036e-06
AC093525.1	9.29652e-11	0.293702	0.644	0.312	2.10008e-06
ARL6IP5	9.33456e-11	0.307042	0.58	0.271	2.10868e-06
RSRP1	9.56421e-11	0.332741	0.46	0.19	2.16056e-06
YWHAZ	9.76525e-11	0.307522	0.471	0.193	2.20597e-06
SQSTM1	9.8555e-11	0.366578	0.517	0.236	2.22636e-06
CAND1	9.94721e-11	0.290497	0.293	0.087	2.24707e-06
CCNI	1.02614e-10	0.308686	0.718	0.365	2.31804e-06
PRH1	1.05887e-10	0.406038	0.46	0.199	2.39198e-06
MYL6	1.07228e-10	0.281978	0.592	0.267	2.42228e-06
ELMO1	1.0923e-10	0.366304	0.822	0.486	2.46752e-06
KIAA2026	1.16616e-10	0.319163	0.431	0.17	2.63434e-06
NLK	1.27799e-10	0.315744	0.356	0.128	2.88697e-06
EZH1	1.35952e-10	0.283622	0.368	0.132	3.07114e-06
TOGARAM1	1.39414e-10	0.309945	0.339	0.117	3.14936e-06
ATP1A1	1.40504e-10	0.310929	0.425	0.168	3.17399e-06
NBR1	1.4115e-10	0.284863	0.397	0.144	3.18859e-06
NKTR	1.48103e-10	0.332469	0.552	0.255	3.34565e-06
KDSR	1.50974e-10	0.289121	0.293	0.088	3.41049e-06
CAT	1.74006e-10	0.31601	0.282	0.087	3.93079e-06
FNTA	2.05832e-10	0.305024	0.345	0.121	4.64974e-06
CAMTA1	2.07042e-10	0.338692	0.385	0.148	4.67707e-06
MTMR10	2.07487e-10	0.313024	0.402	0.153	4.68713e-06
DPP6	2.14833e-10	0.300669	0.356	0.126	4.85308e-06
NAP1L4	2.16352e-10	0.313258	0.333	0.112	4.88738e-06
SLC27A1	2.25946e-10	0.331455	0.287	0.09	5.10413e-06
CUTA	2.37879e-10	0.317148	0.328	0.11	5.37368e-06
CFL1	2.38537e-10	0.325036	0.856	0.563	5.38854e-06
HACD2	2.43859e-10	0.306813	0.322	0.108	5.50878e-06
AC120057.2	2.59194e-10	0.344891	0.753	0.431	5.85518e-06
NAALADL2	2.61611e-10	0.302415	0.379	0.143	5.90979e-06
HACD3	2.88463e-10	0.283341	0.264	0.076	6.51638e-06
LRP6	2.98095e-10	0.291414	0.287	0.09	6.73397e-06
OSBPL9	2.99476e-10	0.290235	0.293	0.092	6.76517e-06
CDC42BPB	3.16944e-10	0.273198	0.316	0.105	7.15976e-06
NR3C1	3.33082e-10	0.279991	0.483	0.209	7.52432e-06
AC242426.2	3.41771e-10	0.304219	0.322	0.11	7.7206e-06
IMPAD1	3.43665e-10	0.360721	0.351	0.13	7.76339e-06
RCAN2	3.45788e-10	0.296614	0.264	0.078	7.81136e-06
CSNK1A1	3.46514e-10	0.341587	0.448	0.191	7.82776e-06
GABARAP	3.50311e-10	0.342407	0.747	0.428	7.91353e-06
RAP1GDS1	3.54293e-10	0.335457	0.397	0.153	8.00348e-06
SREBF2	3.72672e-10	0.329192	0.368	0.139	8.41866e-06
HOOK3	3.76313e-10	0.319714	0.391	0.153	8.50091e-06
AGO3	3.94979e-10	0.301513	0.299	0.101	8.92257e-06
NDUFB8	4.08204e-10	0.252849	0.316	0.103	9.22133e-06
CBX6	4.36518e-10	0.272395	0.287	0.09	9.86095e-06
MIR181A1HG	4.39656e-10	0.316171	0.322	0.116	9.93184e-06
ZNF706	4.65441e-10	0.266595	0.362	0.13	1.05143e-05
RBM5	5.18576e-10	0.400829	0.443	0.199	1.17146e-05
C11orf58	5.24172e-10	0.293955	0.414	0.17	1.18411e-05
NDUFS2	5.4014e-10	0.289634	0.31	0.106	1.22018e-05
NDUFB4	5.49971e-10	0.255114	0.339	0.121	1.24238e-05
AC110285.2	5.6155e-10	0.291581	0.305	0.099	1.26854e-05
USO1	5.81273e-10	0.278296	0.282	0.088	1.3131e-05
PJA2	5.88114e-10	0.298311	0.414	0.164	1.32855e-05
ATP2A2	5.91207e-10	0.304679	0.425	0.177	1.33554e-05
ZC3H13	5.95901e-10	0.370365	0.345	0.134	1.34614e-05
RAB6A	6.29364e-10	0.283302	0.379	0.146	1.42173e-05
FKBP3	6.45914e-10	0.270906	0.287	0.092	1.45912e-05
PKD2	6.57337e-10	0.269761	0.414	0.164	1.48492e-05
NDFIP1	6.58878e-10	0.293104	0.425	0.175	1.48841e-05
SLC25A29	7.0754e-10	0.322635	0.276	0.088	1.59833e-05
ADAR	7.44071e-10	0.336677	0.362	0.143	1.68086e-05
POLR2A	7.45285e-10	0.284659	0.293	0.096	1.6836e-05
PAXBP1	7.86704e-10	0.371598	0.316	0.11	1.77716e-05
C6orf89	7.86782e-10	0.263028	0.259	0.078	1.77734e-05
NDUFA4	8.00464e-10	0.340303	0.483	0.217	1.80825e-05
ECPAS	8.34618e-10	0.26789	0.368	0.141	1.8854e-05
CLK1	8.46275e-10	0.268288	0.586	0.276	1.91174e-05
PBX1	8.58369e-10	0.319642	0.362	0.135	1.93906e-05
MECP2	8.58672e-10	0.268355	0.374	0.141	1.93974e-05
P2RX7	9.72187e-10	0.356595	0.511	0.244	2.19617e-05
ARHGAP5	9.77909e-10	0.329104	0.339	0.126	2.2091e-05
MEIS2	9.88185e-10	0.344004	0.27	0.085	2.23231e-05
CIAO2B	9.94463e-10	0.268603	0.299	0.097	2.24649e-05
U2SURP	1.00286e-09	0.330514	0.391	0.161	2.26546e-05
PCNP	1.00594e-09	0.264392	0.328	0.114	2.27241e-05
SRRM1	1.01544e-09	0.343303	0.483	0.227	2.29389e-05
MT2A	1.05714e-09	0.38259	0.282	0.092	2.38808e-05
TMEM230	1.13426e-09	0.330339	0.287	0.097	2.5623e-05
CCDC152	1.22446e-09	0.255574	0.282	0.088	2.76606e-05
UBL5	1.27207e-09	0.28752	0.414	0.168	2.8736e-05
CWC15	1.2872e-09	0.256254	0.276	0.087	2.90779e-05
DAZAP2	1.35314e-09	0.292305	0.477	0.215	3.05674e-05
MAGI1	1.53151e-09	0.288606	0.408	0.17	3.45968e-05
PRKAR2A	1.53474e-09	0.253012	0.328	0.114	3.46697e-05
XRCC5	1.55109e-09	0.308328	0.454	0.197	3.50392e-05
CSNK2B	1.58852e-09	0.346854	0.293	0.103	3.58846e-05
HNRNPK	1.61359e-09	0.283677	0.552	0.265	3.64511e-05
CLTA	1.74768e-09	0.26879	0.333	0.121	3.94801e-05
AC021078.1	1.76049e-09	0.339324	0.362	0.146	3.97695e-05
HERC2	1.77187e-09	0.276599	0.276	0.09	4.00265e-05
GLO1	1.8821e-09	0.254132	0.276	0.088	4.25167e-05
LUC7L	1.96123e-09	0.287255	0.287	0.097	4.43043e-05
RAB10	2.01505e-09	0.305611	0.42	0.179	4.552e-05
MT-ND2	2.02486e-09	0.276195	1	0.877	4.57415e-05
PYURF	2.04625e-09	0.256379	0.293	0.099	4.62247e-05
OIP5-AS1	2.08586e-09	0.298892	0.379	0.152	4.71196e-05
BMI1	2.12017e-09	0.329631	0.282	0.094	4.78947e-05
TENM3	2.16058e-09	0.354709	0.31	0.11	4.88075e-05
AKIRIN1	2.17648e-09	0.303597	0.305	0.105	4.91666e-05
AGO2	2.17677e-09	0.289948	0.356	0.135	4.91732e-05
LMNA	2.22161e-09	0.288219	0.293	0.101	5.01862e-05
C1orf43	2.29799e-09	0.309797	0.466	0.208	5.19115e-05
SLC38A2	2.35808e-09	0.336305	0.5	0.242	5.32691e-05
TIA1	2.5618e-09	0.260061	0.333	0.123	5.7871e-05
PCM1	2.63124e-09	0.34893	0.494	0.242	5.94398e-05
CLSTN1	2.69397e-09	0.31414	0.328	0.123	6.08568e-05
CANX	2.73744e-09	0.282315	0.552	0.258	6.18388e-05
FBXO9	2.81733e-09	0.254596	0.287	0.097	6.36434e-05
UBE4B	2.96639e-09	0.253607	0.362	0.139	6.70108e-05
AC073548.1	3.04633e-09	0.274814	0.316	0.116	6.88165e-05
GAPDH	3.1818e-09	0.333231	0.822	0.549	7.1877e-05
AC118549.1	3.21492e-09	0.298281	0.362	0.139	7.26251e-05
SFSWAP	3.26374e-09	0.257736	0.385	0.152	7.37278e-05
UBE4A	3.33226e-09	0.320905	0.264	0.088	7.52758e-05
HNRNPH3	3.55071e-09	0.337472	0.42	0.184	8.02106e-05
MPRIP	3.84977e-09	0.264241	0.339	0.128	8.69663e-05
MDN1	3.91218e-09	0.305427	0.299	0.108	8.83761e-05
PPP1R21	3.92062e-09	0.253031	0.356	0.137	8.85669e-05
SMIM14	4.01007e-09	0.289629	0.276	0.092	9.05874e-05
PSMB1	4.05231e-09	0.285561	0.391	0.162	9.15417e-05
PDCD6IP	4.09998e-09	0.266205	0.374	0.146	9.26185e-05
NUMA1	4.10382e-09	0.327727	0.374	0.15	9.27052e-05
PEA15	4.22082e-09	0.298068	0.494	0.222	9.53484e-05
PREX1	4.26639e-09	0.287453	0.649	0.341	9.63777e-05
UBA1	4.63359e-09	0.294985	0.529	0.253	0.000104673
NSD3	5.00253e-09	0.309976	0.391	0.162	0.000113007
SLC20A2	5.0964e-09	0.297054	0.299	0.106	0.000115128
MORF4L1	5.27675e-09	0.271404	0.511	0.242	0.000119202
ITGAV	5.32967e-09	0.337223	0.345	0.135	0.000120397
RHOG	5.46857e-09	0.319242	0.368	0.15	0.000123535
PRRC2C	5.64073e-09	0.272802	0.598	0.309	0.000127424
TAOK1	5.7143e-09	0.288611	0.46	0.213	0.000129086
INSIG1	5.76764e-09	0.277354	0.27	0.088	0.000130291
MAT2A	5.88808e-09	0.362184	0.443	0.209	0.000133012
ATP2B4	6.14955e-09	0.286033	0.253	0.081	0.000138918
CYP51A1	6.22887e-09	0.281002	0.282	0.099	0.00014071
TMCC3	6.28458e-09	0.281065	0.391	0.159	0.000141969
TPM4	6.39491e-09	0.268497	0.31	0.114	0.000144461
PDE7A	6.45256e-09	0.362619	0.316	0.126	0.000145763
MTATP6P1	6.46613e-09	0.31114	0.977	0.778	0.00014607
CSDE1	6.52198e-09	0.27808	0.534	0.26	0.000147332
MTDH	6.92075e-09	0.286827	0.598	0.305	0.00015634
CDK5RAP3	7.11626e-09	0.325128	0.506	0.247	0.000160756
ANXA7	7.28084e-09	0.261001	0.253	0.081	0.000164474
ACTR1A	7.32037e-09	0.293567	0.276	0.096	0.000165367
EIF4A2	7.4667e-09	0.294682	0.517	0.249	0.000168673
CYTH1	7.60107e-09	0.28027	0.443	0.197	0.000171708
PLEKHB2	7.9068e-09	0.310613	0.293	0.106	0.000178615
TAPT1	7.90711e-09	0.261817	0.282	0.099	0.000178622
USP9X	8.00682e-09	0.273427	0.397	0.17	0.000180874
RNF167	8.36416e-09	0.256209	0.259	0.083	0.000188946
DYNLRB1	8.41216e-09	0.282359	0.391	0.162	0.000190031
KIF13B	8.45806e-09	0.340529	0.305	0.114	0.000191068
RYBP	8.60882e-09	0.358006	0.414	0.188	0.000194473
KLHL2	9.98947e-09	0.256352	0.253	0.083	0.000225662
SFPQ	1.05e-08	0.286139	0.511	0.24	0.000237195
AC000120.2	1.07186e-08	0.276383	0.282	0.101	0.000242134
ATP6AP2	1.13145e-08	0.252882	0.402	0.17	0.000255595
KCNIP4	1.18017e-08	0.488753	0.328	0.13	0.000266601
SNX1	1.3699e-08	0.272116	0.333	0.128	0.00030946
DHX15	1.37267e-08	0.258887	0.287	0.103	0.000310086
YY1AP1	1.39729e-08	0.251382	0.259	0.088	0.000315647
FNIP2	1.39736e-08	0.315324	0.431	0.204	0.000315663
COX8A	1.40882e-08	0.266711	0.408	0.175	0.000318252
AC018521.1	1.41859e-08	0.32445	0.517	0.26	0.000320459
PLD3	1.4291e-08	0.259403	0.287	0.105	0.000322834
NAPA	1.61767e-08	0.27057	0.351	0.144	0.000365431
GLUD1	1.69542e-08	0.259163	0.322	0.121	0.000382996
ARPC5	1.75237e-08	0.3221	0.362	0.152	0.000395861
MTRR	1.84317e-08	0.272248	0.276	0.099	0.000416373
TTC3	1.95839e-08	0.265468	0.483	0.227	0.0004424
AK3	1.98824e-08	0.265156	0.287	0.103	0.000449143
TTC37	2.05738e-08	0.255607	0.322	0.125	0.000464763
ACO2	2.06531e-08	0.25625	0.316	0.121	0.000466553
WIPF1	2.08776e-08	0.309619	0.471	0.227	0.000471626
UBE2D2	2.15161e-08	0.323248	0.385	0.171	0.00048605
KHDRBS1	2.17531e-08	0.27613	0.42	0.195	0.000491403
SPATA13	2.21273e-08	0.377001	0.425	0.204	0.000499856
NEMF	2.25314e-08	0.291615	0.431	0.197	0.000508985
MYO10	2.34956e-08	0.270997	0.339	0.141	0.000530765
TAX1BP1	2.43443e-08	0.315192	0.391	0.177	0.000549939
THRAP3	2.5236e-08	0.255378	0.264	0.094	0.000570081
TFEB	2.55662e-08	0.277358	0.322	0.125	0.000577539
RABGAP1	2.81314e-08	0.250544	0.316	0.117	0.000635489
RBBP6	2.92555e-08	0.306667	0.379	0.162	0.000660882
RERE	3.26412e-08	0.299049	0.626	0.338	0.000737365
JUND	3.29456e-08	0.331947	0.546	0.285	0.00074424
EDF1	3.4395e-08	0.251224	0.333	0.134	0.000776983
IDI1	3.86912e-08	0.307107	0.31	0.119	0.000874035
CTSL	4.03164e-08	0.260999	0.351	0.143	0.000910748
ILF3	4.0866e-08	0.285176	0.322	0.13	0.000923163
CBFA2T2	4.09984e-08	0.292156	0.328	0.13	0.000926153
ABHD12	4.37659e-08	0.298265	0.397	0.177	0.000988672
ARRDC3	4.74656e-08	0.341375	0.368	0.161	0.00107225
CASC3	5.08858e-08	0.255367	0.276	0.101	0.00114951
ZRANB2	5.34813e-08	0.280049	0.408	0.181	0.00120814
MGST3	5.58188e-08	0.283821	0.305	0.119	0.00126095
EIF4G3	5.85302e-08	0.294108	0.506	0.253	0.0013222
CRYZL1	6.10364e-08	0.256702	0.259	0.092	0.00137881
SLTM	7.38148e-08	0.260039	0.391	0.177	0.00166748
SUGT1	8.72071e-08	0.307762	0.299	0.119	0.00197001
PHB	8.86636e-08	0.257679	0.253	0.09	0.00200291
ATP6V1G2-DDX39B	1.07154e-07	0.260851	0.379	0.166	0.00242061
GTDC1	1.09691e-07	0.276122	0.379	0.168	0.00247793
NFIC	1.12196e-07	0.30394	0.621	0.357	0.0025345
ECH1	1.13066e-07	0.269288	0.333	0.139	0.00255417
USP34	1.2115e-07	0.260114	0.454	0.222	0.00273677
SNX9	1.21578e-07	0.282905	0.356	0.159	0.00274644
HSPA1B	1.21856e-07	0.290679	0.822	0.514	0.00275272
PRKX	1.33752e-07	0.278396	0.276	0.105	0.00302146
IRF2BP2	1.45738e-07	0.290274	0.437	0.215	0.00329223
KMT2E	1.52086e-07	0.336987	0.511	0.28	0.00343563
DMTF1	1.61633e-07	0.257574	0.31	0.126	0.00365129
CNOT2	1.63263e-07	0.262518	0.46	0.229	0.00368812
CLN8	2.44957e-07	0.266207	0.282	0.112	0.00553357
SRSF11	2.52265e-07	0.307746	0.649	0.37	0.00569868
FHIT	2.84338e-07	0.328913	0.609	0.361	0.00642319
ZSWIM6	3.00739e-07	0.273987	0.592	0.329	0.00679369
SYNGR2	3.18896e-07	0.257433	0.362	0.168	0.00720386
WDR7	3.20433e-07	0.281858	0.305	0.128	0.00723859
NPIPA5	3.3426e-07	0.274267	0.299	0.126	0.00755093
ANKRD17	3.98232e-07	0.319996	0.391	0.197	0.00899607
WAC	4.54805e-07	0.251148	0.517	0.271	0.010274
CNBP	4.8779e-07	0.251912	0.454	0.227	0.0110192
TNKS	9.64958e-07	0.252986	0.328	0.146	0.0217984
TRPC4AP	9.97581e-07	0.252904	0.31	0.139	0.0225353
STARD7	1.23163e-06	0.302176	0.264	0.112	0.0278226
CCNY	1.44497e-06	0.30935	0.391	0.204	0.0326418
GNAI2	1.65684e-06	0.250208	0.592	0.334	0.0374281
FSCN1	1.90094e-06	0.251608	0.471	0.247	0.0429422
AC118754.1	1.97443e-06	0.26141	0.414	0.209	0.0446023
UBE2B	2.28897e-06	0.26973	0.391	0.195	0.0517078
APC	2.61238e-06	0.281988	0.259	0.112	0.0590137
CCT4	2.977e-06	0.251694	0.333	0.162	0.0672505
PARK7	3.40891e-06	0.308436	0.282	0.128	0.0770073
CHKA	2.37879e-05	0.250357	0.305	0.152	0.537368

## Sheet: Microglia 1
row.names	p_val	avg_logFC	pct.1	pct.2	p_val_adj
AL159163.1	1.0379e-81	1.71231	0.914	0.111	2.34463e-77
SLCO2B1	3.44382e-80	1.57411	0.853	0.087	7.7796e-76
C1QB	7.76719e-80	1.83084	0.905	0.116	1.75461e-75
CSF1R	3.24471e-78	1.84312	0.914	0.132	7.32979e-74
LAPTM5	1.83734e-77	1.53318	0.888	0.105	4.15055e-73
RNASET2	5.02037e-76	1.78587	0.983	0.191	1.1341e-71
C3	9.9112e-76	1.75583	0.888	0.121	2.23894e-71
A2M	1.27891e-72	1.57391	0.836	0.1	2.88905e-68
ST6GAL1	9.77483e-72	1.45508	0.836	0.1	2.20813e-67
TYROBP	2.87461e-71	1.48256	0.862	0.111	6.49375e-67
HLA-DRB1	5.19572e-70	1.64955	0.879	0.132	1.17371e-65
C1QC	5.19918e-69	1.37397	0.81	0.095	1.17449e-64
APOE	8.62952e-69	1.8784	0.914	0.17	1.94941e-64
APBB1IP	1.60896e-67	1.5119	0.879	0.139	3.63463e-63
TBXAS1	2.07084e-67	1.43919	0.802	0.101	4.67803e-63
CYFIP1	8.16693e-67	1.46792	0.862	0.139	1.84491e-62
HLA-DRB6	1.83374e-66	1.17124	0.647	0.041	4.14242e-62
GPX1	3.68966e-66	1.37105	0.81	0.105	8.33493e-62
INPP5D	4.52087e-66	1.30913	0.845	0.119	1.02127e-61
VSIG4	5.12405e-66	1.49525	0.707	0.065	1.15752e-61
CD74	1.39524e-65	2.02338	1	0.314	3.15184e-61
KCTD12	2.36811e-65	1.34186	0.802	0.101	5.34955e-61
LHFPL2	7.79595e-64	1.32509	0.802	0.114	1.7611e-59
CX3CR1	9.92527e-63	1.45304	0.647	0.052	2.24212e-58
CTSB	2.75082e-61	1.49653	0.905	0.176	6.2141e-57
FYB1	3.13265e-60	1.27823	0.819	0.123	7.07665e-56
FRMD4A	5.11646e-60	1.7494	0.948	0.284	1.15581e-55
HS3ST4	1.69993e-59	1.46379	0.724	0.088	3.84015e-55
MAF	3.75756e-59	1.38238	0.733	0.095	8.48832e-55
LY86	4.33015e-59	1.07773	0.647	0.057	9.7818e-55
HLA-DPA1	4.6123e-59	1.5686	0.828	0.15	1.04192e-54
ITGB2	4.95622e-59	1.1546	0.655	0.062	1.11961e-54
AC093516.1	8.31038e-58	1.15266	0.621	0.052	1.87731e-53
HLA-DRA	1.61923e-57	1.62294	0.853	0.163	3.65784e-53
HCLS1	1.67134e-57	1.18811	0.69	0.077	3.77556e-53
MEF2C	2.89336e-57	1.30224	0.784	0.118	6.53609e-53
C1QA	4.12248e-57	1.31141	0.767	0.106	9.31268e-53
CELF2	1.86917e-56	1.41799	0.836	0.16	4.22245e-52
SCIN	4.04363e-56	1.19887	0.655	0.067	9.13456e-52
CD14	5.68727e-56	1.44544	0.655	0.07	1.28475e-51
ADAM28	1.41589e-55	1.16535	0.724	0.095	3.19851e-51
MERTK	2.4996e-55	1.19792	0.5	0.025	5.6466e-51
PLXDC2	2.63425e-54	1.52562	1	0.511	5.95076e-50
RGS10	2.9467e-54	1.10653	0.629	0.065	6.6566e-50
LRP1	3.74305e-54	0.899148	0.543	0.036	8.45556e-50
SLC2A5	5.58115e-54	1.12665	0.647	0.069	1.26078e-49
SORL1	8.43933e-54	1.68301	0.922	0.335	1.90644e-49
FCGR3A	2.06655e-53	1.06396	0.664	0.072	4.66834e-49
HLA-B	8.91959e-53	1.2606	0.905	0.208	2.01494e-48
HLA-DPB1	1.73225e-52	1.17868	0.69	0.087	3.91314e-48
ARHGAP24	2.69573e-52	1.36099	0.828	0.175	6.08966e-48
HLA-DMB	3.12426e-52	1.08569	0.595	0.057	7.05771e-48
ZFP36L1	3.94777e-52	1.37778	0.871	0.199	8.91801e-48
DOCK8	1.06318e-51	1.33844	0.733	0.118	2.40172e-47
LRMDA	1.85124e-51	1.27476	0.828	0.165	4.18195e-47
BLNK	3.1949e-51	1.14419	0.595	0.062	7.21728e-47
TREM2	1.07018e-50	1.01667	0.595	0.06	2.41754e-46
SELPLG	1.4548e-50	0.994029	0.569	0.051	3.2864e-46
RHBDF2	2.85471e-50	1.04765	0.672	0.087	6.4488e-46
TMEM119	1.03164e-49	0.945236	0.474	0.026	2.33047e-45
SLC1A3	1.79296e-49	1.50966	0.966	0.387	4.05029e-45
TPT1	4.22045e-49	1.52249	0.991	0.572	9.53401e-45
CST3	4.13332e-48	1.12245	0.707	0.111	9.33717e-44
CSGALNACT1	8.82412e-48	1.1138	0.569	0.059	1.99337e-43
MTHFD1L	1.16296e-47	0.984492	0.586	0.062	2.62713e-43
ARRB2	7.7244e-47	1.2014	0.672	0.109	1.74494e-42
FOXN3	1.17728e-46	1.22665	0.862	0.243	2.65948e-42
HLA-E	1.66067e-46	1.08462	0.664	0.098	3.75146e-42
CD84	2.06224e-46	1.05274	0.474	0.033	4.65859e-42
BMP2K	3.51712e-46	1.10724	0.681	0.111	7.94518e-42
CHST11	3.81781e-46	1.09614	0.767	0.149	8.62442e-42
ADORA3	4.28794e-46	1.02309	0.647	0.09	9.68646e-42
MAP3K5	5.80531e-46	0.939511	0.595	0.074	1.31142e-41
CD53	7.75984e-46	1.03304	0.672	0.105	1.75295e-41
HLA-DQB1	8.02728e-46	1.19443	0.586	0.072	1.81336e-41
SYK	8.55704e-46	1.16606	0.629	0.093	1.93304e-41
SFMBT2	1.9831e-45	1.31928	0.776	0.181	4.47981e-41
CEBPD	2.79636e-45	1.04617	0.647	0.093	6.31699e-41
MARCKS	3.1822e-45	1.23888	0.776	0.176	7.18859e-41
HLA-C	6.79787e-45	1.11815	0.784	0.165	1.53564e-40
LYN	8.18288e-45	0.908038	0.595	0.069	1.84851e-40
ENTPD1	8.58761e-45	0.95243	0.526	0.051	1.93994e-40
FCGR2A	8.93743e-45	0.971899	0.569	0.064	2.01897e-40
CD37	9.86677e-45	1.05156	0.517	0.051	2.2289e-40
ABR	1.15057e-44	1.03928	0.672	0.106	2.59914e-40
IL13RA1	1.46708e-44	0.950436	0.569	0.067	3.31414e-40
MAML2	1.50676e-44	1.2405	0.836	0.221	3.40376e-40
FCER1G	1.71371e-44	1.08777	0.621	0.088	3.87127e-40
GPR34	1.81765e-44	0.976725	0.509	0.046	4.10607e-40
LGALS9	1.86657e-44	1.00503	0.638	0.095	4.21657e-40
ZFHX3	2.17632e-44	1.08573	0.862	0.237	4.91631e-40
RCSD1	2.37663e-44	0.936394	0.552	0.06	5.36881e-40
FCGRT	3.16234e-44	1.02691	0.552	0.062	7.14372e-40
TGFBR1	5.67811e-44	0.941629	0.612	0.085	1.28268e-39
SRGN	7.79539e-44	0.862304	0.707	0.116	1.76098e-39
LINC01141	8.92585e-44	0.853296	0.388	0.016	2.01635e-39
LINC02232	9.46527e-44	0.848178	0.431	0.026	2.1382e-39
BHLHE41	1.0597e-43	1.27982	0.862	0.284	2.39386e-39
LPCAT2	1.12345e-43	1.04143	0.698	0.131	2.53788e-39
CYBA	2.43224e-43	0.880421	0.569	0.067	5.49442e-39
ARHGAP15	3.20243e-43	0.984878	0.716	0.134	7.2343e-39
ARHGDIB	3.49942e-43	0.914403	0.621	0.085	7.90519e-39
ARPC1B	3.51366e-43	0.808602	0.517	0.051	7.93736e-39
LNCAROD	6.4955e-43	1.06581	0.569	0.074	1.46733e-38
ZFP36L2	8.59903e-43	1.33026	0.819	0.24	1.94252e-38
IL17RA	1.14322e-42	0.962179	0.638	0.1	2.58254e-38
RPL37	3.26019e-42	1.17705	0.957	0.42	7.36476e-38
GRN	4.71137e-42	1.11007	0.698	0.144	1.0643e-37
CSF3R	9.51925e-42	0.852267	0.491	0.047	2.1504e-37
DOCK2	1.06667e-41	0.87955	0.569	0.072	2.40961e-37
AOAH	1.39147e-41	0.983048	0.578	0.08	3.14334e-37
ARHGAP26	2.55722e-41	1.01529	0.681	0.124	5.77676e-37
MS4A6A	2.61137e-41	0.890379	0.569	0.074	5.89909e-37
DOCK4	3.04875e-41	1.2621	0.931	0.44	6.88713e-37
RPS28	3.92444e-41	0.883754	0.724	0.154	8.86531e-37
SRGAP2	4.31872e-41	1.16703	0.69	0.147	9.75599e-37
PLCB2	9.4026e-41	0.840152	0.517	0.059	2.12405e-36
SKAP2	1.4504e-40	1.00211	0.638	0.109	3.27645e-36
MCF2L	1.80222e-40	0.908721	0.603	0.095	4.07122e-36
PABPC1	1.88512e-40	1.21467	0.905	0.361	4.25849e-36
DISC1	2.21209e-40	1.00227	0.595	0.098	4.9971e-36
CD4	3.3298e-40	0.894986	0.56	0.075	7.52203e-36
PTAFR	5.53299e-40	0.706726	0.353	0.015	1.2499e-35
MEF2A	7.02138e-40	1.17919	0.759	0.206	1.58613e-35
FTL	8.74882e-40	1.26404	0.974	0.526	1.97636e-35
C1orf162	1.06982e-39	0.953625	0.509	0.059	2.41671e-35
ETV6	1.30905e-39	1.04673	0.681	0.136	2.95713e-35
NCKAP1L	1.76489e-39	0.796099	0.457	0.041	3.9869e-35
HCK	2.17698e-39	0.754879	0.397	0.026	4.9178e-35
RPL31	2.18141e-39	1.14999	0.914	0.387	4.92782e-35
AC011481.4	2.65769e-39	1.1948	0.517	0.065	6.00373e-35
RPLP1	9.06519e-39	1.11802	0.948	0.428	2.04783e-34
TMSB10	1.31308e-38	1.04206	0.81	0.227	2.96626e-34
ITPR2	1.82137e-38	1.13254	0.741	0.191	4.11449e-34
HLA-DMA	1.96115e-38	0.889293	0.483	0.054	4.43023e-34
DLEU1	2.78709e-38	1.05152	0.621	0.119	6.29605e-34
RUNX1	4.45621e-38	1.00819	0.69	0.139	1.00666e-33
RPS19	4.60433e-38	1.08547	0.888	0.33	1.04012e-33
AIF1	4.74505e-38	0.828601	0.5	0.059	1.07191e-33
LST1	5.03125e-38	0.742855	0.448	0.041	1.13656e-33
CTSC	5.11595e-38	0.866374	0.517	0.065	1.15569e-33
MS4A7	8.16688e-38	0.861393	0.431	0.039	1.8449e-33
ASAH1	8.33538e-38	1.06627	0.698	0.163	1.88296e-33
ALOX5	1.43376e-37	0.802658	0.448	0.044	3.23886e-33
PAG1	1.56812e-37	0.983639	0.56	0.088	3.54238e-33
RPL13	1.92434e-37	1.10578	0.922	0.425	4.34709e-33
APOC1	2.49575e-37	1.14074	0.491	0.059	5.6379e-33
DENND3	2.66426e-37	1.01282	0.629	0.114	6.01856e-33
B2M	4.74515e-37	1.01944	0.948	0.508	1.07193e-32
IKZF1	4.99126e-37	0.83379	0.526	0.067	1.12753e-32
CEBPB	5.45197e-37	0.771446	0.414	0.034	1.2316e-32
MAML3	6.8935e-37	0.996189	0.707	0.17	1.55724e-32
RPL34	1.30892e-36	1.08644	0.914	0.41	2.95685e-32
WDFY4	1.31687e-36	0.710522	0.457	0.047	2.97482e-32
TMSB4X	3.26365e-36	1.02191	0.862	0.322	7.37258e-32
IRF8	4.8566e-36	0.859652	0.397	0.033	1.09711e-31
RBM47	8.62572e-36	0.860152	0.5	0.065	1.94855e-31
PALD1	8.7057e-36	0.916079	0.474	0.057	1.96662e-31
RPL26	8.90099e-36	0.943092	0.81	0.247	2.01073e-31
ANKRD44	1.61876e-35	1.04436	0.759	0.212	3.65679e-31
LPAR5	1.87666e-35	0.63838	0.353	0.021	4.23937e-31
RPS6	2.16463e-35	1.17664	0.966	0.577	4.88991e-31
OGFRL1	2.16602e-35	0.801481	0.543	0.082	4.89304e-31
CXCL16	2.31407e-35	1.07863	0.534	0.085	5.22749e-31
RYR1	2.62069e-35	0.79998	0.431	0.044	5.92015e-31
LAIR1	3.10371e-35	0.692243	0.397	0.033	7.01127e-31
ALOX5AP	3.46876e-35	0.849291	0.56	0.09	7.83593e-31
LAT2	3.65274e-35	0.817141	0.466	0.056	8.25153e-31
SLC8A1	5.82714e-35	1.00862	0.603	0.109	1.31635e-30
CYBB	1.20613e-34	0.819529	0.483	0.064	2.72465e-30
FAM149A	1.46951e-34	0.920222	0.5	0.069	3.31962e-30
STAB1	1.55566e-34	0.867065	0.44	0.047	3.51423e-30
SRGAP2B	2.21771e-34	0.809489	0.457	0.056	5.0098e-30
PTPRC	2.36382e-34	0.821462	0.638	0.123	5.33987e-30
RGS1	2.41953e-34	1.31127	0.603	0.121	5.46573e-30
MKNK1	2.79476e-34	0.774065	0.457	0.056	6.31336e-30
DSCAM	4.34284e-34	0.90139	0.491	0.07	9.81048e-30
CACNA1A	4.44202e-34	0.937859	0.457	0.059	1.00345e-29
NEAT1	5.06037e-34	0.965414	0.957	0.521	1.14314e-29
IFNGR1	5.35786e-34	1.01506	0.664	0.155	1.21034e-29
LCP1	7.17028e-34	0.821995	0.517	0.077	1.61977e-29
SAT1	7.24853e-34	0.827907	0.724	0.186	1.63744e-29
RPL23	1.07433e-33	1.13616	0.853	0.358	2.42691e-29
SLA	1.1479e-33	0.805089	0.474	0.062	2.5931e-29
RPS24	1.18076e-33	1.0376	0.871	0.368	2.66735e-29
ARHGAP12	1.42618e-33	0.841011	0.448	0.057	3.22174e-29
RPL14P1	1.56463e-33	0.989893	0.793	0.266	3.53449e-29
APMAP	1.58699e-33	0.982246	0.612	0.137	3.58502e-29
RPS11	1.72e-33	1.0105	0.905	0.456	3.88547e-29
FLI1	1.7526e-33	0.830627	0.474	0.064	3.95913e-29
GNB4	2.10454e-33	0.698711	0.44	0.051	4.75416e-29
PRKCD	3.36673e-33	0.668106	0.388	0.036	7.60544e-29
KCNQ3	3.42206e-33	0.927189	0.491	0.074	7.73043e-29
PLD4	5.28817e-33	0.681972	0.379	0.034	1.1946e-28
AC004922.1	5.38291e-33	0.714097	0.5	0.075	1.216e-28
RPS2	6.03272e-33	1.03926	0.871	0.34	1.36279e-28
RPS14	8.63562e-33	1.02174	0.828	0.332	1.95079e-28
P2RY12	1.31994e-32	0.892169	0.422	0.049	2.98174e-28
PILRA	1.50981e-32	0.638411	0.362	0.029	3.41065e-28
CTSH	1.78205e-32	0.689838	0.379	0.034	4.02565e-28
HLA-J	2.26611e-32	0.849835	0.5	0.078	5.11915e-28
RPS20	3.05093e-32	0.887155	0.836	0.304	6.89205e-28
AC010422.3	3.33244e-32	0.644151	0.397	0.041	7.52798e-28
CD68	5.31402e-32	0.705258	0.397	0.041	1.20044e-27
ADCY7	7.34742e-32	0.663695	0.44	0.056	1.65978e-27
AKAP13	9.212e-32	0.822522	0.638	0.141	2.08099e-27
LRRK1	9.69202e-32	0.726127	0.422	0.049	2.18943e-27
RPS3	1.1779e-31	1.00118	0.819	0.307	2.66088e-27
SOCS6	1.28314e-31	0.82614	0.5	0.082	2.89862e-27
NHSL1	1.3978e-31	0.912862	0.345	0.028	3.15764e-27
SMAP2	1.77271e-31	0.922418	0.526	0.095	4.00455e-27
CD99	1.82393e-31	0.736938	0.5	0.077	4.12027e-27
CEBPA	1.87155e-31	0.79693	0.345	0.028	4.22784e-27
SLC9A9	1.99022e-31	0.869675	0.724	0.206	4.49591e-27
CTSS	2.25248e-31	0.582655	0.328	0.023	5.08835e-27
RPL10	3.71904e-31	0.966543	0.845	0.355	8.40131e-27
CAPZB	3.72263e-31	0.933286	0.741	0.239	8.40942e-27
RPS18	3.81469e-31	0.926389	0.759	0.245	8.61738e-27
RPLP2	4.56377e-31	0.988939	0.879	0.413	1.03096e-26
MAN2B1	4.64216e-31	0.675352	0.405	0.047	1.04866e-26
ABCC4	6.49783e-31	0.821809	0.457	0.065	1.46786e-26
FAM49B	6.51007e-31	0.922425	0.733	0.232	1.47062e-26
FGD4	7.80656e-31	0.885104	0.69	0.183	1.7635e-26
NINJ1	8.55584e-31	0.688229	0.457	0.064	1.93276e-26
APOC2	1.01024e-30	0.960517	0.483	0.077	2.28214e-26
APOC4-APOC2	1.01024e-30	0.960517	0.483	0.077	2.28214e-26
RPS8	1.16109e-30	0.962235	0.871	0.443	2.62289e-26
AC011462.1	2.53684e-30	0.610231	0.328	0.025	5.73072e-26
MSN	2.53842e-30	0.721785	0.491	0.08	5.73429e-26
CD81	2.69317e-30	0.944055	0.897	0.459	6.08388e-26
RPL32	2.74605e-30	0.97518	0.853	0.361	6.20333e-26
FMNL1	3.12767e-30	0.548783	0.328	0.025	7.0654e-26
SP100	5.65912e-30	0.701607	0.483	0.077	1.27839e-25
DIAPH2	5.84651e-30	0.810677	0.603	0.131	1.32073e-25
BNC2	6.72101e-30	0.793179	0.474	0.075	1.51828e-25
AXL	6.96043e-30	0.63018	0.328	0.026	1.57236e-25
COTL1	8.04804e-30	0.718555	0.491	0.082	1.81805e-25
B3GNT5	9.26953e-30	0.872003	0.466	0.069	2.09399e-25
KCNMA1	1.20923e-29	0.888731	0.586	0.129	2.73165e-25
RPS16	1.47856e-29	0.973836	0.871	0.44	3.34007e-25
LILRB4	1.52999e-29	0.612877	0.319	0.025	3.45624e-25
PRAM1	1.77013e-29	0.802796	0.422	0.057	3.99873e-25
FKBP5	2.22167e-29	0.94235	0.741	0.257	5.01876e-25
FMNL3	2.36469e-29	0.780339	0.526	0.103	5.34184e-25
CD86	4.46131e-29	0.73893	0.388	0.046	1.00781e-24
SERPINA1	5.19455e-29	0.68374	0.353	0.036	1.17345e-24
RPL37A	5.7049e-29	0.958846	0.879	0.423	1.28874e-24
PIK3R5	7.83487e-29	0.618186	0.353	0.036	1.7699e-24
VSIR	1.18118e-28	0.821238	0.397	0.052	2.6683e-24
LPAR6	1.23587e-28	0.697905	0.517	0.093	2.79184e-24
PLCG2	1.28561e-28	0.599789	0.371	0.041	2.90419e-24
ATP8B4	1.32637e-28	0.718629	0.422	0.06	2.99627e-24
RPL3	1.64086e-28	0.861597	0.56	0.127	3.70671e-24
PDGFB	1.7836e-28	0.681536	0.328	0.028	4.02915e-24
SLC4A7	1.79884e-28	0.724768	0.466	0.077	4.06359e-24
FOLR2	1.96934e-28	0.763196	0.284	0.018	4.44874e-24
RIN3	2.59486e-28	0.656234	0.371	0.042	5.8618e-24
RPS29	2.68247e-28	0.874017	0.836	0.353	6.05971e-24
RPS12	2.90448e-28	0.922779	0.853	0.392	6.56121e-24
RPL12	3.79909e-28	0.842637	0.716	0.216	8.58214e-24
FAM13A	5.91588e-28	0.715537	0.483	0.083	1.3364e-23
ITM2B	6.61465e-28	0.938881	0.983	0.681	1.49425e-23
AP1B1	7.90993e-28	0.757605	0.466	0.08	1.78685e-23
IL6ST	9.89392e-28	0.906527	0.698	0.224	2.23504e-23
RPL27	1.06224e-27	0.86047	0.767	0.291	2.3996e-23
CNPY3	1.13218e-27	0.854308	0.5	0.106	2.55761e-23
FGD2	1.23213e-27	0.686746	0.336	0.033	2.78339e-23
RPL19	1.25575e-27	0.969093	0.879	0.438	2.83675e-23
CAPG	1.37873e-27	0.583047	0.31	0.026	3.11454e-23
NPL	1.56107e-27	0.807131	0.448	0.074	3.52647e-23
SLC15A3	1.70366e-27	0.522759	0.276	0.018	3.84857e-23
PYCARD	1.89158e-27	0.620339	0.328	0.031	4.27307e-23
AL645941.2	1.90258e-27	0.533463	0.284	0.02	4.29793e-23
TNFRSF1B	2.28558e-27	0.685539	0.431	0.065	5.16312e-23
IPCEF1	2.38301e-27	0.765998	0.457	0.077	5.38322e-23
HLA-DQA1	2.59252e-27	0.932459	0.397	0.054	5.85651e-23
RPL11	2.73094e-27	0.897918	0.871	0.412	6.16918e-23
NFATC2	2.76336e-27	0.680518	0.414	0.059	6.24243e-23
BST2	4.13856e-27	0.499846	0.276	0.018	9.349e-23
ITGAX	4.49241e-27	0.749325	0.422	0.064	1.01483e-22
NAPSB	4.76754e-27	0.599	0.319	0.029	1.07699e-22
RPL27A	4.92487e-27	0.878784	0.828	0.338	1.11253e-22
CAMK1D	5.45166e-27	0.600366	0.5	0.092	1.23153e-22
MICAL1	5.95848e-27	0.661151	0.371	0.049	1.34602e-22
HSPB1	6.3421e-27	1.34239	0.664	0.209	1.43268e-22
CHST15	7.24528e-27	0.579914	0.31	0.028	1.63671e-22
NAV3	7.77518e-27	0.90091	0.664	0.209	1.75641e-22
FMN1	8.13328e-27	0.788942	0.405	0.06	1.83731e-22
CD302	8.2889e-27	0.632638	0.336	0.034	1.87246e-22
MED13L	1.63625e-26	0.890237	0.724	0.273	3.69628e-22
AP002990.1	2.31251e-26	0.811876	0.612	0.173	5.22395e-22
EEF1G	2.31251e-26	0.811876	0.612	0.173	5.22395e-22
TGFBR2	3.26359e-26	0.638175	0.414	0.064	7.37245e-22
AC135178.2	3.59866e-26	0.816319	0.56	0.136	8.12938e-22
SSH2	3.66031e-26	0.935013	0.819	0.395	8.26864e-22
AC245033.1	3.68183e-26	0.788425	0.629	0.181	8.31726e-22
GLIPR1	3.92623e-26	0.664926	0.345	0.039	8.86936e-22
LINC01094	4.07168e-26	0.560921	0.293	0.025	9.19792e-22
NRP1	4.89479e-26	0.726315	0.345	0.041	1.10573e-21
SLC1A5	5.10453e-26	0.536762	0.276	0.02	1.15311e-21
PDE3B	5.14436e-26	0.58631	0.302	0.028	1.16211e-21
MYO1F	6.57408e-26	0.637814	0.362	0.046	1.48509e-21
RPS4X	7.75221e-26	0.939469	0.75	0.315	1.75122e-21
TBC1D22A	1.08005e-25	0.743161	0.552	0.134	2.43982e-21
EVL	1.18331e-25	0.859697	0.612	0.176	2.67309e-21
RACK1	1.2487e-25	0.930284	0.707	0.261	2.82081e-21
MS4A14	1.5362e-25	0.653071	0.293	0.026	3.47028e-21
TAL1	1.8141e-25	0.572299	0.328	0.036	4.09805e-21
AL137230.2	2.40373e-25	0.898386	0.603	0.175	5.43002e-21
RPS23	3.24103e-25	0.781811	0.767	0.292	7.32148e-21
GAS6	4.06282e-25	0.703198	0.405	0.067	9.17792e-21
PTPRE	4.56068e-25	0.77106	0.569	0.142	1.03026e-20
PRKCH	5.61146e-25	0.586765	0.388	0.057	1.26763e-20
CPVL	6.27491e-25	0.723935	0.414	0.07	1.4175e-20
GGTA1P	7.23109e-25	0.509758	0.267	0.02	1.6335e-20
RPL35A	7.63426e-25	0.851632	0.759	0.304	1.72458e-20
BIN2	8.04177e-25	0.537948	0.345	0.042	1.81664e-20
TRMT2B	8.08194e-25	0.540579	1	0.964	1.82571e-20
CLEC7A	1.24139e-24	0.524233	0.336	0.039	2.8043e-20
STAT6	1.2597e-24	0.612168	0.328	0.038	2.84565e-20
LINC01736	1.39129e-24	0.534708	0.302	0.029	3.14292e-20
LASP1	1.95185e-24	0.504942	0.267	0.021	4.40922e-20
RPS15A	2.06818e-24	0.830348	0.776	0.315	4.67203e-20
S100A11	2.52388e-24	0.746964	0.5	0.113	5.70143e-20
MBNL1	2.74936e-24	0.879162	0.733	0.297	6.21081e-20
AC138811.2	2.89685e-24	0.838216	0.759	0.294	6.54399e-20
SH2B3	3.77336e-24	0.615958	0.371	0.056	8.52403e-20
CCND3	4.0666e-24	0.733941	0.431	0.082	9.18645e-20
SIPA1	4.14824e-24	0.582763	0.336	0.042	9.37087e-20
RPL36	4.18123e-24	0.782928	0.716	0.247	9.4454e-20
AC005070.1	6.64066e-24	0.688922	0.543	0.136	1.50013e-19
NUDT3	7.65988e-24	0.671077	0.552	0.142	1.73037e-19
ANKRD44-IT1	8.3503e-24	0.623661	0.405	0.069	1.88633e-19
GNAS	8.6248e-24	0.740293	0.914	0.51	1.94834e-19
NCK2	8.90724e-24	0.60567	0.405	0.07	2.01215e-19
RPS17	9.98982e-24	0.837581	0.638	0.209	2.2567e-19
PIK3AP1	1.17365e-23	0.613127	0.336	0.042	2.65127e-19
FGL2	1.28897e-23	0.591957	0.293	0.029	2.91177e-19
LDLRAD4	1.88676e-23	0.858003	0.767	0.332	4.26218e-19
AL163541.1	2.29689e-23	0.967167	0.379	0.062	5.18867e-19
TNFSF13	2.41607e-23	0.620673	0.293	0.031	5.4579e-19
SDCCAG8	2.685e-23	0.771851	0.664	0.23	6.0654e-19
RPL30	2.7088e-23	0.816843	0.845	0.425	6.11917e-19
CMTM6	3.78542e-23	0.621415	0.422	0.078	8.55126e-19
OLR1	3.91674e-23	0.493053	0.336	0.042	8.84792e-19
HLA-A	4.61748e-23	0.68893	0.724	0.261	1.04309e-18
RPS27A	6.12711e-23	0.852448	0.853	0.42	1.38411e-18
OTULINL	7.36745e-23	0.556893	0.284	0.029	1.66431e-18
NRIP1	7.55988e-23	0.650953	0.414	0.077	1.70778e-18
PRKAG2	8.18909e-23	0.613224	0.328	0.044	1.84992e-18
FPR1	8.89583e-23	0.629127	0.302	0.034	2.00957e-18
SH3RF3	8.93963e-23	0.71626	0.422	0.08	2.01946e-18
PARVG	9.35247e-23	0.487212	0.276	0.026	2.11272e-18
TNFSF12-TNFSF13	1.0381e-22	0.617182	0.293	0.033	2.34507e-18
P4HA1	1.22703e-22	0.724234	0.483	0.113	2.77187e-18
GIMAP4	1.23907e-22	0.45883	0.267	0.025	2.79906e-18
MLXIPL	1.27071e-22	0.581643	0.353	0.052	2.87054e-18
CD300A	1.37135e-22	0.479053	0.259	0.023	3.09788e-18
POU2F2	1.44892e-22	0.696182	0.422	0.082	3.2731e-18
ARL5A	1.5683e-22	0.658307	0.466	0.106	3.5428e-18
RPL28	1.97129e-22	0.850216	0.741	0.337	4.45315e-18
FXYD5	2.01531e-22	0.650405	0.284	0.031	4.55259e-18
UBA52	2.04793e-22	0.81535	0.733	0.307	4.62627e-18
RPL35	2.48644e-22	0.726661	0.741	0.307	5.61686e-18
RPL18	2.49488e-22	0.793922	0.776	0.335	5.63592e-18
CLEC9A	2.52427e-22	0.520625	0.293	0.033	5.70233e-18
LRRFIP1	3.042e-22	0.543199	0.457	0.095	6.87188e-18
PELI1	3.11389e-22	0.679632	0.483	0.116	7.03429e-18
LRCH1	3.18069e-22	0.642485	0.414	0.077	7.18518e-18
RPL5	3.47415e-22	0.922057	0.802	0.417	7.8481e-18
IGSF21	3.5281e-22	0.661583	0.302	0.038	7.96999e-18
PLEKHO1	3.61391e-22	0.490042	0.371	0.057	8.16382e-18
SMAD3	3.88313e-22	0.511042	0.284	0.031	8.77199e-18
SH3BGRL	4.93072e-22	0.695917	0.474	0.113	1.11385e-17
SUSD3	5.22964e-22	0.41157	0.259	0.023	1.18138e-17
JDP2	5.79241e-22	0.511894	0.319	0.042	1.30851e-17
ARHGAP31	6.20982e-22	0.619062	0.31	0.039	1.4028e-17
RPS7	6.4316e-22	0.735811	0.664	0.234	1.4529e-17
AC110749.1	6.73568e-22	0.630775	0.466	0.106	1.52159e-17
EML4	7.83476e-22	0.685329	0.414	0.082	1.76987e-17
AL450405.1	8.42157e-22	0.709893	0.448	0.105	1.90243e-17
C3AR1	9.2834e-22	0.571516	0.31	0.041	2.09712e-17
RPL18A	9.45992e-22	0.656547	0.491	0.124	2.13699e-17
PPT1	1.15322e-21	0.65787	0.483	0.119	2.60513e-17
ATG16L2	1.32022e-21	0.574632	0.328	0.047	2.98238e-17
RAB31	1.76423e-21	0.653471	0.474	0.113	3.9854e-17
RPL29	1.78041e-21	0.783273	0.543	0.168	4.02195e-17
NLRP1	1.78799e-21	0.550058	0.319	0.046	4.03906e-17
MARCH3	1.95153e-21	0.589467	0.336	0.051	4.40851e-17
SNX29	2.25854e-21	0.594324	0.681	0.234	5.10203e-17
TLR2	2.28176e-21	0.503508	0.267	0.028	5.1545e-17
GAA	2.29647e-21	0.621782	0.422	0.09	5.18773e-17
ARHGAP25	2.6803e-21	0.647576	0.302	0.039	6.0548e-17
CTSD	3.62706e-21	0.804721	0.647	0.245	8.19352e-17
LPP	4.0674e-21	0.728965	0.534	0.158	9.18825e-17
ETV5	4.48618e-21	0.503636	0.302	0.039	1.01343e-16
DDAH2	4.67448e-21	0.46689	0.336	0.051	1.05596e-16
STOM	4.8178e-21	0.652116	0.414	0.087	1.08834e-16
RGS19	4.82721e-21	0.501993	0.276	0.031	1.09047e-16
TNFAIP2	5.07649e-21	0.658716	0.293	0.038	1.14678e-16
RGS16	5.84574e-21	0.718049	0.379	0.067	1.32055e-16
TLR7	6.32339e-21	0.523545	0.267	0.029	1.42845e-16
DUSP1	6.79009e-21	0.781946	0.569	0.176	1.53388e-16
LMO2	6.97066e-21	0.543756	0.284	0.034	1.57467e-16
ATG7	7.2956e-21	0.882536	0.509	0.145	1.64808e-16
PLCL2	8.85805e-21	0.471692	0.353	0.059	2.00103e-16
ADGRG1	1.14149e-20	0.529631	0.276	0.033	2.57862e-16
PPP1R18	1.19718e-20	0.467163	0.284	0.034	2.70443e-16
RPL7A	1.20115e-20	0.760897	0.664	0.271	2.71339e-16
KLF6	1.22097e-20	0.425647	0.526	0.139	2.75817e-16
ARHGAP22	1.30729e-20	0.668811	0.466	0.116	2.95317e-16
EPB41L2	1.45619e-20	0.777836	0.819	0.451	3.28954e-16
RNF166	1.53888e-20	0.533611	0.302	0.041	3.47633e-16
SYNDIG1	1.78175e-20	0.785344	0.655	0.255	4.02497e-16
RPLP1P11	1.84015e-20	0.707015	0.543	0.167	4.1569e-16
MGAT1	1.9788e-20	0.623947	0.388	0.075	4.47011e-16
TNFRSF1A	2.25736e-20	0.534918	0.284	0.036	5.09937e-16
TMEM176B	2.27966e-20	0.588823	0.284	0.036	5.14975e-16
FOXP2	2.50809e-20	0.652743	0.422	0.092	5.66577e-16
RPL38	3.06242e-20	0.789627	0.828	0.448	6.91802e-16
AL512328.1	3.24374e-20	0.519294	1	0.917	7.3276e-16
RPL10A	3.30803e-20	0.747746	0.664	0.266	7.47284e-16
ATP6V1B2	3.71109e-20	0.647998	0.526	0.154	8.38335e-16
USP53	3.79879e-20	0.525597	0.328	0.052	8.58146e-16
CSF2RA	4.56971e-20	0.502318	0.302	0.042	1.0323e-15
TNRC18	4.59916e-20	0.522866	0.345	0.059	1.03895e-15
RNF149	5.04518e-20	0.623809	0.534	0.16	1.13971e-15
RPL14	5.32265e-20	0.605341	0.448	0.113	1.20239e-15
VAMP8	5.43975e-20	0.521961	0.259	0.029	1.22884e-15
NPC2	5.7178e-20	0.760445	0.543	0.173	1.29165e-15
ARHGAP27	5.7487e-20	0.466729	0.267	0.031	1.29863e-15
CMKLR1	6.76304e-20	0.4735	0.267	0.031	1.52777e-15
PICALM	6.92196e-20	0.779307	0.81	0.42	1.56367e-15
FCHSD2	7.14172e-20	0.650572	0.526	0.15	1.61332e-15
RPS21	7.23766e-20	0.710505	0.716	0.301	1.63499e-15
GPRIN3	7.78583e-20	0.602777	0.336	0.056	1.75882e-15
CARD11	8.48575e-20	0.50801	0.259	0.029	1.91693e-15
SLC25A6	9.20299e-20	0.649107	0.509	0.142	2.07895e-15
FAU	1.03449e-19	0.704038	0.802	0.399	2.33691e-15
CPED1	1.29705e-19	0.554134	0.362	0.067	2.93004e-15
OSBPL3	1.58492e-19	0.485347	0.345	0.059	3.58033e-15
SOAT1	1.6322e-19	0.553195	0.362	0.069	3.68714e-15
ADAP2	1.68769e-19	0.558738	0.31	0.047	3.81249e-15
AC068547.1	1.78102e-19	0.525469	0.362	0.069	4.02333e-15
DOCK11	1.81396e-19	0.554552	0.328	0.056	4.09773e-15
ETS2	1.86023e-19	0.507796	0.31	0.046	4.20227e-15
HAMP	1.99581e-19	0.748689	0.328	0.054	4.50854e-15
MGAT4A	3.20871e-19	0.60764	0.414	0.096	7.24847e-15
TPK1	3.60013e-19	0.545239	0.345	0.064	8.13269e-15
AC016708.1	3.70841e-19	0.766381	0.552	0.191	8.37731e-15
MANBA	3.88016e-19	0.525677	0.405	0.088	8.76528e-15
GYPC	3.91272e-19	0.548025	0.293	0.042	8.83883e-15
GRB2	3.9849e-19	0.705071	0.543	0.172	9.00189e-15
CMIP	4.13657e-19	0.557884	0.543	0.157	9.34451e-15
MOB1A	4.45853e-19	0.536405	0.31	0.051	1.00718e-14
NME2	5.8141e-19	0.547587	0.431	0.105	1.31341e-14
PTEN	6.09834e-19	0.536098	0.422	0.1	1.37761e-14
SPP1	6.65995e-19	1.05542	0.879	0.68	1.50448e-14
RASSF8	7.57668e-19	0.709256	0.44	0.108	1.71157e-14
HIF1A	8.97485e-19	0.55684	0.517	0.147	2.02742e-14
DRAM2	9.56339e-19	0.514326	0.319	0.054	2.16037e-14
SSH1	1.40014e-18	0.503313	0.362	0.072	3.16292e-14
RPL13A	1.43548e-18	0.66576	0.629	0.222	3.24274e-14
NME1-NME2	1.56308e-18	0.537984	0.431	0.106	3.53099e-14
ACAP2	1.56848e-18	0.609293	0.491	0.144	3.5432e-14
AC245033.4	1.57857e-18	0.645477	0.44	0.116	3.56598e-14
PTPRJ	1.60397e-18	0.642708	0.569	0.193	3.62336e-14
TNS3	1.85848e-18	0.495015	0.31	0.051	4.1983e-14
COLGALT1	1.88213e-18	0.476841	0.328	0.057	4.25173e-14
MAN1A1	1.99222e-18	0.647561	0.328	0.059	4.50042e-14
PACS1	2.18777e-18	0.498497	0.345	0.065	4.94217e-14
TTC19	2.19157e-18	0.672843	0.603	0.227	4.95075e-14
ZNF710	2.53084e-18	0.44696	0.284	0.042	5.71717e-14
IFI16	2.55113e-18	0.564313	0.474	0.129	5.763e-14
BACH1	2.64131e-18	0.638817	0.431	0.106	5.96672e-14
CCND1	3.10163e-18	0.5888	0.284	0.044	7.00658e-14
CMTM7	3.14769e-18	0.488394	0.276	0.039	7.11064e-14
STK17A	3.34868e-18	0.457237	0.259	0.034	7.56467e-14
TAB2	4.13421e-18	0.587113	0.483	0.139	9.33918e-14
SIPA1L2	7.778e-18	0.462453	0.353	0.07	1.75705e-13
IFITM3	1.07393e-17	0.654227	0.379	0.085	2.42602e-13
SLC11A1	1.31659e-17	0.488409	0.267	0.038	2.97418e-13
RPL8	1.36439e-17	0.762297	0.612	0.248	3.08215e-13
SLC16A3	1.4168e-17	0.477534	0.267	0.038	3.20056e-13
MIS18BP1	1.47182e-17	0.513829	0.302	0.052	3.32484e-13
CHCHD10	1.60126e-17	0.55258	0.31	0.057	3.61725e-13
DAGLB	1.61425e-17	0.50154	0.31	0.057	3.64659e-13
EPB41	2.07518e-17	0.383909	0.302	0.051	4.68782e-13
SEC24D	2.36237e-17	0.500311	0.914	0.68	5.33659e-13
RPS6KA1	2.87593e-17	0.512584	0.319	0.06	6.49672e-13
ARHGEF6	3.79267e-17	0.5076	0.259	0.038	8.56764e-13
RPL6	4.02702e-17	0.435266	0.353	0.074	9.09704e-13
AKR1A1	4.69614e-17	0.451951	0.345	0.072	1.06086e-12
SUSD6	4.72837e-17	0.564685	0.397	0.096	1.06814e-12
TSNAX-DISC1	5.03751e-17	0.446873	0.31	0.057	1.13797e-12
TRAK1	5.23846e-17	0.577266	0.353	0.078	1.18337e-12
DDIT4	5.58628e-17	0.983328	0.491	0.163	1.26194e-12
JAZF1	6.10168e-17	0.658754	0.543	0.186	1.37837e-12
REL	6.22937e-17	0.498865	0.345	0.07	1.40721e-12
SLC25A37	6.54528e-17	0.598056	0.517	0.163	1.47858e-12
RPL23A	7.8589e-17	0.583818	0.621	0.232	1.77532e-12
DHRS3	8.73815e-17	0.479582	0.259	0.038	1.97395e-12
RPS9	9.43585e-17	0.752441	0.655	0.301	2.13156e-12
ABI1	9.9321e-17	0.502747	0.345	0.074	2.24366e-12
SDK1	1.77324e-16	0.590044	0.353	0.078	4.00574e-12
TUBA1B	2.04875e-16	0.715834	0.802	0.448	4.62812e-12
B4GALT1	2.30896e-16	0.459876	0.302	0.054	5.21593e-12
HELZ	2.63887e-16	0.490974	0.448	0.124	5.9612e-12
RPS13	2.82824e-16	0.707759	0.733	0.387	6.389e-12
VASH1	3.93829e-16	0.553532	0.293	0.054	8.89659e-12
TBC1D2B	4.68065e-16	0.414293	0.276	0.047	1.05736e-11
MYOF	4.8614e-16	0.459962	0.267	0.044	1.09819e-11
ST8SIA4	5.29717e-16	0.434995	0.276	0.047	1.19663e-11
LPIN2	5.95824e-16	0.493121	0.31	0.062	1.34597e-11
ARPC2	6.03301e-16	0.656068	0.543	0.193	1.36286e-11
RREB1	6.37556e-16	0.422923	0.319	0.064	1.44024e-11
RPS15	7.76303e-16	0.680397	0.664	0.319	1.75367e-11
PCNX2	7.91952e-16	0.609483	0.397	0.106	1.78902e-11
HCST	8.18557e-16	0.446302	0.259	0.041	1.84912e-11
RPL15	1.25639e-15	0.663124	0.81	0.466	2.83818e-11
HIVEP3	1.48799e-15	0.594041	0.302	0.062	3.36136e-11
ARPC3	1.5264e-15	0.566189	0.483	0.152	3.44815e-11
AC124319.1	1.69871e-15	0.548668	0.457	0.144	3.83738e-11
RPS6KA3	1.93496e-15	0.512763	0.328	0.074	4.37107e-11
HPS3	2.04222e-15	0.431452	0.319	0.067	4.61337e-11
MIR4709	2.12161e-15	0.485568	0.328	0.075	4.79272e-11
CTTNBP2NL	2.26489e-15	0.583455	0.362	0.092	5.11639e-11
TBC1D4	2.27003e-15	0.442311	0.319	0.069	5.128e-11
CTBP2	2.34856e-15	0.543099	0.414	0.119	5.3054e-11
RPL17	2.47387e-15	0.54851	0.526	0.183	5.58846e-11
ADPGK	2.64087e-15	0.475387	0.302	0.062	5.96574e-11
PLEKHA2	2.80348e-15	0.450258	0.259	0.044	6.33307e-11
ZYX	3.04816e-15	0.467802	0.328	0.072	6.8858e-11
SERPINB9	3.06586e-15	0.482762	0.31	0.065	6.92579e-11
DTNA	3.21571e-15	0.572072	0.422	0.127	7.2643e-11
KCNIP1	3.28887e-15	0.546771	0.276	0.051	7.42955e-11
RPL4	3.44847e-15	0.682125	0.69	0.359	7.7901e-11
RPS25	3.90412e-15	0.671242	0.552	0.225	8.81941e-11
NACA	4.89889e-15	0.501748	0.629	0.257	1.10666e-10
CKLF	7.32172e-15	0.510049	0.267	0.049	1.65398e-10
CLIC1	9.16467e-15	0.489572	0.259	0.046	2.0703e-10
JAK2	1.07125e-14	0.484904	0.259	0.047	2.41996e-10
RPS10-NUDT3	1.3741e-14	0.454262	0.345	0.082	3.1041e-10
SIRPA	1.58306e-14	0.517157	0.474	0.157	3.57613e-10
TMIGD3	1.91801e-14	0.462997	0.353	0.088	4.33278e-10
HERPUD1	2.06732e-14	0.506529	0.474	0.158	4.67008e-10
RUNX2	2.11111e-14	0.508047	0.319	0.077	4.76899e-10
ADAM10	2.31757e-14	0.483197	0.379	0.106	5.23539e-10
TSPAN14	2.41285e-14	0.463337	0.302	0.065	5.45062e-10
OXR1	3.19379e-14	0.682164	0.448	0.152	7.21477e-10
PMS1	3.40375e-14	0.49627	0.302	0.067	7.68906e-10
VOPP1	3.49207e-14	0.463691	0.31	0.069	7.88859e-10
TRIO	4.4006e-14	0.590223	0.422	0.136	9.94096e-10
RPL9	5.42471e-14	0.441291	0.328	0.08	1.22544e-09
GALNT2	5.8144e-14	0.640546	0.448	0.152	1.31347e-09
RPS5	5.98317e-14	0.607767	0.638	0.312	1.3516e-09
OAZ1	6.47477e-14	0.629694	0.647	0.312	1.46265e-09
IFNGR2	6.54608e-14	0.477044	0.284	0.06	1.47876e-09
PSAP	7.20535e-14	0.634841	0.888	0.592	1.62769e-09
PLXNB2	8.002e-14	0.409989	0.259	0.049	1.80765e-09
UGCG	1.02036e-13	0.430798	0.302	0.069	2.305e-09
CD59	1.02156e-13	0.409324	0.259	0.051	2.30771e-09
RPL24	1.44813e-13	0.500163	0.526	0.203	3.27134e-09
AC115220.2	1.48544e-13	0.500331	0.819	0.526	3.3556e-09
UBE2E2	1.52257e-13	0.595383	0.647	0.306	3.43949e-09
SAMSN1	1.56225e-13	0.434047	0.267	0.052	3.52913e-09
UTRN	1.8386e-13	0.451698	0.31	0.072	4.15339e-09
CD63	2.00046e-13	0.592247	0.569	0.242	4.51904e-09
TMC8	2.05347e-13	0.412801	0.259	0.052	4.63878e-09
USP6NL	2.16256e-13	0.425019	0.267	0.054	4.88522e-09
ATM	2.2047e-13	0.544259	0.509	0.203	4.98042e-09
SCN1B	2.32108e-13	0.470353	0.284	0.064	5.24331e-09
YWHAH	2.41093e-13	0.519677	0.371	0.109	5.44628e-09
APPL2	2.49605e-13	0.558566	0.379	0.113	5.63858e-09
TSPO	2.68497e-13	0.50794	0.31	0.077	6.06535e-09
RGS12	2.93113e-13	0.444031	0.259	0.052	6.62142e-09
ST6GALNAC3	2.9735e-13	0.60899	0.586	0.27	6.71714e-09
TUBB	3.23888e-13	0.47374	0.353	0.098	7.31662e-09
TTC7A	3.48776e-13	0.515363	0.474	0.172	7.87886e-09
C6orf62	3.49165e-13	0.414764	0.466	0.155	7.88764e-09
SELENOH	3.51409e-13	0.447979	0.31	0.075	7.93833e-09
AC005912.1	4.04865e-13	0.37873	0.284	0.062	9.1459e-09
NEDD4L	4.45399e-13	0.419173	0.276	0.059	1.00616e-08
HSD17B11	4.84963e-13	0.453824	0.293	0.069	1.09553e-08
SCAMP2	6.66599e-13	0.582809	0.422	0.141	1.50585e-08
DENND4B	7.01838e-13	0.393739	0.345	0.093	1.58545e-08
ARHGAP4	7.22497e-13	0.411301	0.284	0.065	1.63212e-08
RPLP0P6	7.55585e-13	0.622119	0.612	0.294	1.70687e-08
PARP8	7.9417e-13	0.42149	0.276	0.06	1.79403e-08
GAB2	8.87748e-13	0.561401	0.638	0.309	2.00542e-08
ARHGAP27P1-BPTFP1-KPNA2P3	1.00341e-12	0.473253	0.353	0.103	2.2667e-08
SNX5	1.02824e-12	0.490314	0.328	0.088	2.32279e-08
ADK	1.07224e-12	0.393416	0.362	0.105	2.42218e-08
FLOT1	1.08514e-12	0.453807	0.397	0.127	2.45133e-08
GNAQ	1.14939e-12	0.589112	0.672	0.351	2.59647e-08
ST3GAL6	1.27332e-12	0.480877	0.302	0.077	2.87644e-08
USP24	1.45617e-12	0.468249	0.353	0.103	3.28948e-08
ERICH1	1.72681e-12	0.422816	0.328	0.088	3.90087e-08
UCP2	1.7443e-12	0.429277	0.259	0.056	3.94037e-08
NAP1L1	2.05142e-12	0.558792	0.578	0.253	4.63417e-08
ZFAND3	2.11975e-12	0.537087	0.586	0.275	4.78852e-08
SNHG5	2.13695e-12	0.505956	0.397	0.132	4.82736e-08
GPD2	2.6032e-12	0.418298	0.31	0.082	5.88063e-08
CTNND1	2.82872e-12	0.528708	0.379	0.123	6.39007e-08
AKR1B1	2.89786e-12	0.526466	0.336	0.095	6.54626e-08
SUCLG2	3.06101e-12	0.465875	0.319	0.087	6.91482e-08
CAP1	3.82285e-12	0.631738	0.526	0.232	8.63581e-08
TTC17	3.94023e-12	0.467432	0.362	0.111	8.90099e-08
PFDN5	4.00739e-12	0.489159	0.466	0.175	9.0527e-08
AC016876.2	4.56198e-12	0.501642	0.491	0.198	1.03055e-07
ZDHHC14	4.86437e-12	0.463482	0.379	0.119	1.09886e-07
AP001931.1	4.94586e-12	0.511185	0.353	0.109	1.11727e-07
CCDC50	5.46936e-12	0.397393	0.259	0.059	1.23553e-07
GRK2	6.58615e-12	0.412672	0.319	0.085	1.48781e-07
LYST	6.83894e-12	0.421119	0.353	0.103	1.54492e-07
ACTR2	6.85894e-12	0.511336	0.491	0.204	1.54944e-07
HEXB	7.2386e-12	0.381352	0.31	0.083	1.6352e-07
TPM3	8.00242e-12	0.422362	0.302	0.082	1.80775e-07
SH3KBP1	8.27235e-12	0.597675	0.517	0.23	1.86872e-07
KLHL5	8.84506e-12	0.390003	0.319	0.087	1.9981e-07
RAPGEF1	8.95374e-12	0.411011	0.336	0.096	2.02265e-07
GALNT1	9.2748e-12	0.409121	0.302	0.08	2.09518e-07
MSR1	1.00705e-11	0.28314	0.259	0.056	2.27493e-07
IKBKB	1.10105e-11	0.384752	0.276	0.067	2.48727e-07
RB1	1.23566e-11	0.450174	0.353	0.111	2.79136e-07
SP110	1.38672e-11	0.365679	0.284	0.074	3.1326e-07
ANKS1A	1.46769e-11	0.366105	0.276	0.067	3.31551e-07
ARHGEF40	1.48697e-11	0.423401	0.267	0.064	3.35907e-07
WASHC4	1.66958e-11	0.441508	0.345	0.108	3.77158e-07
RBM6	1.75496e-11	0.476408	0.474	0.191	3.96445e-07
IL22RA1	2.91554e-11	0.421931	0.871	0.667	6.58621e-07
APLP2	3.09039e-11	0.495655	0.474	0.19	6.9812e-07
PBX4	3.24257e-11	0.477758	0.741	0.426	7.32497e-07
MIR29B2CHG	3.3365e-11	0.337688	0.319	0.088	7.53716e-07
RASAL2	3.4407e-11	0.437992	0.302	0.085	7.77253e-07
NUMB	3.54006e-11	0.427714	0.388	0.136	7.997e-07
CREG1	4.02912e-11	0.530331	0.44	0.167	9.10179e-07
KHDRBS3	5.66749e-11	0.64136	0.431	0.175	1.28029e-06
WASF2	5.78179e-11	0.477152	0.595	0.278	1.30611e-06
EEF1D	6.58941e-11	0.481501	0.414	0.158	1.48855e-06
DDX5	7.04396e-11	0.511387	0.69	0.395	1.59123e-06
MGAT5	7.16018e-11	0.50704	0.474	0.198	1.61748e-06
AFF1	7.77273e-11	0.511837	0.371	0.132	1.75586e-06
MYH9	7.84863e-11	0.480815	0.422	0.158	1.77301e-06
ACTB	7.84911e-11	0.545994	0.845	0.626	1.77311e-06
ADAM9	8.13328e-11	0.411426	0.328	0.098	1.83731e-06
MEMO1	1.22406e-10	0.352353	0.284	0.077	2.76516e-06
BASP1	1.25812e-10	0.290462	0.259	0.062	2.8421e-06
ATF6	1.29651e-10	0.519566	0.422	0.163	2.92882e-06
UNC13D	1.32652e-10	0.483802	0.767	0.525	2.99661e-06
MFSD1	1.45001e-10	0.389752	0.284	0.082	3.27558e-06
NAGK	1.56075e-10	0.534943	0.397	0.15	3.52573e-06
EEF1B2	1.60931e-10	0.445583	0.302	0.09	3.63542e-06
CAB39	1.61537e-10	0.437529	0.31	0.096	3.64912e-06
EIF3H	1.76022e-10	0.433642	0.379	0.139	3.97635e-06
ELMO1	1.78913e-10	0.498156	0.819	0.518	4.04164e-06
ARL15	1.84094e-10	0.354777	0.345	0.106	4.15868e-06
USP15	1.84102e-10	0.501193	0.319	0.103	4.15887e-06
GRID2	1.95025e-10	0.675579	0.379	0.132	4.40561e-06
SLC2A3	2.11322e-10	0.42088	0.267	0.069	4.77376e-06
H2AFY	2.12292e-10	0.410661	0.431	0.168	4.79569e-06
NOP53	2.20575e-10	0.331003	0.328	0.101	4.98278e-06
PRKCA	2.55974e-10	0.560322	0.371	0.137	5.78245e-06
ZFAND2A	2.76213e-10	1.08042	0.276	0.082	6.23964e-06
PTBP3	2.8614e-10	0.310437	0.276	0.074	6.4639e-06
EVI2B	3.2576e-10	0.404279	0.302	0.09	7.35893e-06
MYO9B	3.43777e-10	0.540714	0.474	0.216	7.76592e-06
EXOC6	4.13676e-10	0.434297	0.655	0.356	9.34494e-06
AGO4	4.23074e-10	0.419705	0.319	0.1	9.55724e-06
SPRED1	4.37204e-10	0.332311	0.328	0.105	9.87643e-06
KDM2A	4.90611e-10	0.404579	0.336	0.114	1.10829e-05
HSPA1A	5.05818e-10	0.554539	0.966	0.757	1.14264e-05
HIST1H2BD	6.51022e-10	0.377432	0.276	0.077	1.47066e-05
AL359762.3	6.86039e-10	0.373908	0.336	0.111	1.54976e-05
CEP350	7.22189e-10	0.525081	0.457	0.196	1.63143e-05
GLS	7.5253e-10	0.383224	0.293	0.09	1.69996e-05
ADGB	9.38436e-10	0.450093	0.897	0.68	2.11993e-05
MAP3K3	9.38768e-10	0.387169	0.328	0.109	2.12068e-05
PRPF38B	1.02477e-09	0.512906	0.491	0.224	2.31496e-05
SMARCA2	1.04031e-09	0.522435	0.362	0.142	2.35006e-05
RESF1	1.07237e-09	0.407145	0.267	0.077	2.42249e-05
KANSL1	1.09815e-09	0.379869	0.448	0.183	2.48071e-05
APAF1	1.17954e-09	0.342843	0.267	0.077	2.66459e-05
RPL41	1.23175e-09	0.41475	0.371	0.136	2.78253e-05
PAN3	1.37102e-09	0.415704	0.405	0.16	3.09713e-05
BTG1	1.38922e-09	0.387385	0.388	0.144	3.13825e-05
SKIL	1.54636e-09	0.370403	0.319	0.106	3.49323e-05
TMEM109	1.60273e-09	0.32042	0.267	0.075	3.62056e-05
GNAI2	1.60746e-09	0.451336	0.647	0.348	3.63124e-05
SLC38A10	2.48577e-09	0.360424	0.31	0.101	5.61536e-05
UBC	2.49885e-09	0.644687	0.655	0.413	5.64491e-05
ARL6IP4	2.58303e-09	0.405158	0.388	0.15	5.83507e-05
DNAJC10	2.58338e-09	0.345	0.259	0.077	5.83584e-05
IRS2	2.85903e-09	0.486212	0.474	0.211	6.45855e-05
OS9	3.00017e-09	0.396293	0.328	0.113	6.77738e-05
ISCU	3.04837e-09	0.380462	0.379	0.144	6.88627e-05
PI4KA	3.06432e-09	0.394735	0.362	0.134	6.9223e-05
ROCK1	3.06776e-09	0.396689	0.353	0.134	6.93006e-05
PGK1	3.11812e-09	0.493125	0.379	0.155	7.04383e-05
SRRM2	3.32111e-09	0.498587	0.741	0.487	7.50238e-05
SND1	3.32705e-09	0.481415	0.345	0.132	7.51582e-05
CELF1	3.37783e-09	0.377474	0.414	0.167	7.63052e-05
TET2	3.49097e-09	0.390818	0.284	0.092	7.8861e-05
LDHA	3.51975e-09	0.346476	0.284	0.087	7.95111e-05
PABPN1	3.77873e-09	0.428918	0.491	0.229	8.53614e-05
PKM	3.82279e-09	0.477738	0.474	0.221	8.63568e-05
HDAC9	3.99226e-09	0.523836	0.483	0.219	9.01851e-05
SETX	4.08391e-09	0.417158	0.397	0.157	9.22555e-05
SNHG29	4.72051e-09	0.343519	0.284	0.092	0.000106636
CAPZA2	4.90686e-09	0.344524	0.319	0.108	0.000110846
SNX2	5.31449e-09	0.421572	0.293	0.101	0.000120054
STK4	5.48268e-09	0.360592	0.319	0.111	0.000123854
FSCN1	6.03939e-09	0.510504	0.517	0.26	0.00013643
PSMA1	6.28543e-09	0.431476	0.31	0.109	0.000141988
ITSN2	6.56279e-09	0.421546	0.448	0.198	0.000148253
AC026362.1	7.02175e-09	0.404217	0.388	0.155	0.000158621
RPL21P93	7.09919e-09	0.266696	0.31	0.103	0.000160371
ATP1B3	7.11501e-09	0.425981	0.284	0.092	0.000160728
RIN2	8.03307e-09	0.605353	0.414	0.181	0.000181467
GLDN	1.07054e-08	0.570323	0.552	0.301	0.000241835
TAF1D	1.15837e-08	0.316963	0.31	0.105	0.000261675
ACTR3	1.15926e-08	0.35738	0.336	0.126	0.000261877
RAP2A	1.26725e-08	0.405472	0.293	0.101	0.000286273
PIAS1	1.40949e-08	0.465964	0.466	0.211	0.000318404
CUX1	1.42456e-08	0.485723	0.491	0.248	0.000321808
NIPBL	1.6422e-08	0.499205	0.517	0.275	0.000370974
PNRC1	1.8241e-08	0.375249	0.509	0.248	0.000412064
FOXP1	2.02082e-08	0.456412	0.569	0.319	0.000456504
AC073325.2	2.04932e-08	0.642548	0.638	0.404	0.000462942
CHD1	2.0778e-08	0.355085	0.328	0.121	0.000469376
ARAP1	2.20143e-08	0.293041	0.319	0.111	0.000497304
SPIDR	2.28974e-08	0.441911	0.328	0.126	0.000517252
TBRG1	2.59932e-08	0.37102	0.276	0.09	0.000587187
HSPH1	2.68992e-08	0.564182	0.422	0.193	0.000607652
PIK3R1	2.73166e-08	0.43088	0.491	0.243	0.000617081
PHC2	3.02844e-08	0.427739	0.44	0.198	0.000684124
GSK3B	3.11901e-08	0.25393	0.276	0.088	0.000704584
SEC14L1	3.17777e-08	0.410224	0.336	0.134	0.000717857
TOP1	3.28872e-08	0.474704	0.422	0.188	0.000742922
C1orf56	3.83494e-08	0.351659	0.302	0.111	0.000866313
THADA	3.97496e-08	0.426445	0.293	0.106	0.000897944
PFKFB3	4.36918e-08	0.334255	0.362	0.147	0.000986997
DTNB	4.76904e-08	0.435005	0.379	0.162	0.00107733
VPS13C	5.38555e-08	0.454559	0.517	0.268	0.0012166
SNAP23	5.7678e-08	0.411735	0.302	0.109	0.00130295
SEC11A	6.76011e-08	0.462473	0.31	0.119	0.00152711
SMARCC2	7.40555e-08	0.3383	0.353	0.142	0.00167291
SNHG8	7.9635e-08	0.379317	0.31	0.119	0.00179896
AC097634.4	8.45918e-08	0.463926	0.474	0.248	0.00191093
RABEP1	8.59699e-08	0.32557	0.276	0.095	0.00194206
RAC1	8.77959e-08	0.407139	0.681	0.42	0.00198331
TIAM1	8.83316e-08	0.516832	0.431	0.212	0.00199541
SMURF2	9.23488e-08	0.393131	0.31	0.121	0.00208616
TET3	9.3915e-08	0.318306	0.259	0.087	0.00212154
LAPTM4A	9.72991e-08	0.42887	0.319	0.131	0.00219799
GNA13	9.9494e-08	0.25538	0.319	0.119	0.00224757
RTTN	1.00365e-07	0.357677	0.31	0.119	0.00226724
DENND1A	1.10596e-07	0.329315	0.31	0.114	0.00249835
PUM2	1.11203e-07	0.354334	0.491	0.247	0.00251208
NFKBIA	1.16216e-07	0.375012	0.431	0.203	0.00262531
AL022311.1	1.19225e-07	0.40058	0.336	0.139	0.0026933
HSPA1B	1.2315e-07	0.513324	0.767	0.554	0.00278196
EIF3L	1.26127e-07	0.399605	0.336	0.139	0.00284921
EXOC4	1.31183e-07	0.363323	0.448	0.217	0.00296342
CNTRL	1.31694e-07	0.309972	0.276	0.096	0.00297496
TAOK3	1.50935e-07	0.39679	0.466	0.23	0.00340961
DAP3	1.60757e-07	0.356645	0.267	0.095	0.0036315
RPLP0	1.67846e-07	0.373883	0.302	0.118	0.00379164
CREBBP	1.72155e-07	0.42454	0.397	0.188	0.00388898
VPS13B	2.11567e-07	0.386594	0.328	0.134	0.0047793
GNG7	2.31845e-07	0.382332	0.397	0.186	0.00523737
MLXIP	2.39258e-07	0.357757	0.353	0.154	0.00540484
RPN2	2.68796e-07	0.346198	0.31	0.121	0.00607211
PABPC4	2.77515e-07	0.398336	0.267	0.096	0.00626906
TRIR	2.93561e-07	0.290827	0.293	0.114	0.00663155
AKAP10	2.96699e-07	0.368853	0.276	0.103	0.00670243
SERP1	3.01387e-07	0.407752	0.345	0.15	0.00680834
CHD9	3.15088e-07	0.410132	0.457	0.225	0.00711784
SENP3-EIF4A1	3.28149e-07	0.342448	0.328	0.136	0.00741289
TYK2	3.36266e-07	0.301341	0.267	0.096	0.00759625
FBXO11	3.37842e-07	0.363861	0.405	0.19	0.00763185
PPARD	3.44398e-07	0.287677	0.259	0.088	0.00777996
TMED9	3.72018e-07	0.29977	0.259	0.092	0.00840388
CCDC18-AS1	3.7432e-07	0.38068	0.362	0.163	0.00845589
METTL7A	3.99025e-07	0.444559	0.629	0.381	0.00901398
BAZ1A	4.13174e-07	0.262966	0.293	0.108	0.0093336
PADI2	4.34416e-07	0.42085	0.56	0.325	0.00981346
IL15RA	4.39825e-07	0.331245	0.491	0.253	0.00993565
TBC1D5	4.4906e-07	0.399462	0.56	0.332	0.0101443
SCAF11	4.5866e-07	0.368456	0.353	0.158	0.0103611
HM13	4.81041e-07	0.340182	0.284	0.108	0.0108667
SKI	5.28879e-07	0.377885	0.345	0.152	0.0119474
CREBL2	5.57546e-07	0.37586	0.259	0.096	0.012595
AAK1	5.76111e-07	0.420135	0.414	0.204	0.0130144
SEC24B	5.80157e-07	0.329899	0.448	0.221	0.0131058
MYO15B	5.9356e-07	0.366142	0.267	0.1	0.0134085
FOXO3	5.97457e-07	0.437024	0.517	0.289	0.0134966
SARAF	6.47731e-07	0.346747	0.595	0.359	0.0146322
ARHGEF1	6.56299e-07	0.419106	0.319	0.136	0.0148258
VDAC1	6.82199e-07	0.266988	0.267	0.098	0.0154109
SAMHD1	6.84278e-07	0.396739	0.267	0.1	0.0154578
EIF4A1	7.32642e-07	0.377914	0.397	0.186	0.0165504
RNASEK-C17orf49	7.43964e-07	0.464228	0.474	0.245	0.0168061
GIT2	7.47255e-07	0.387613	0.267	0.105	0.0168805
ATP6V0E1	7.75017e-07	0.374944	0.353	0.163	0.0175076
WDR1	8.13829e-07	0.290194	0.284	0.109	0.0183844
RPL36AL	8.60237e-07	0.351987	0.336	0.142	0.0194327
HNRNPM	9.36327e-07	0.313551	0.388	0.181	0.0211516
SMYD3	9.62464e-07	0.288431	0.259	0.095	0.0217421
PKN2	9.81143e-07	0.27503	0.319	0.129	0.022164
BIRC6	9.97026e-07	0.329284	0.483	0.253	0.0225228
SPINT2	1.02847e-06	0.289272	0.259	0.093	0.0232332
DSCR9	1.06525e-06	0.278846	0.448	0.221	0.024064
MICOS10	1.26717e-06	0.26457	0.267	0.098	0.0286255
BABAM2	1.31631e-06	0.335628	0.302	0.126	0.0297354
RAP1A	1.32888e-06	0.326314	0.56	0.31	0.0300194
IMMP2L	1.33523e-06	0.403921	0.345	0.163	0.0301628
HSP90AB1	1.36941e-06	0.504209	0.69	0.497	0.0309349
STAG1	1.37254e-06	0.35445	0.405	0.203	0.0310056
FNDC3B	1.39243e-06	0.343781	0.259	0.098	0.0314551
DCAF7	1.41956e-06	0.260772	0.302	0.123	0.032068
USF2	1.42578e-06	0.358984	0.259	0.1	0.0322084
HEATR5B	1.43965e-06	0.328378	0.284	0.113	0.0325217
JAK1	1.63618e-06	0.331895	0.284	0.118	0.0369612
ID2	1.6467e-06	0.469731	0.31	0.136	0.0371989
PTPN2	1.68201e-06	0.295978	0.267	0.103	0.0379965
TENT2	1.70073e-06	0.329985	0.293	0.121	0.0384195
RABGAP1L	1.70304e-06	0.40019	0.466	0.242	0.0384717
KAT2A	1.71585e-06	0.385533	0.293	0.126	0.038761
PFN1	1.73361e-06	0.363866	0.526	0.292	0.0391623
SH3PXD2B	2.23819e-06	0.32151	0.414	0.204	0.0505607
PNISR	2.44383e-06	0.427288	0.621	0.446	0.0552061
ATP2B1	2.56143e-06	0.265071	0.267	0.103	0.0578628
STX7	3.11629e-06	0.301619	0.345	0.155	0.070397
SRGAP1	3.25731e-06	0.378168	0.302	0.129	0.0735826
RNF145	3.47922e-06	0.326033	0.319	0.142	0.0785955
PBRM1	3.88171e-06	0.320215	0.302	0.131	0.0876878
CHKA	3.88888e-06	0.266033	0.345	0.158	0.0878498
EIF4B	3.93708e-06	0.284142	0.388	0.186	0.0889386
RNASEK	4.06705e-06	0.454087	0.405	0.211	0.0918747
ATP5F1E	4.21754e-06	0.359909	0.474	0.271	0.0952741
RAB1A	4.23203e-06	0.351495	0.397	0.208	0.0956015
P2RY8	4.28873e-06	0.311224	0.543	0.302	0.0968824
BRD4	4.3246e-06	0.379052	0.353	0.17	0.0976927
UBE2D3	4.48877e-06	0.346947	0.526	0.302	0.101401
TIMP2	4.6521e-06	0.316133	0.526	0.317	0.105091
ASAP1	4.78027e-06	0.338907	0.319	0.145	0.107986
DARS	4.86266e-06	0.343804	0.336	0.16	0.109847
BTAF1	5.15247e-06	0.260725	0.293	0.127	0.116394
FER	5.1525e-06	0.292075	0.31	0.136	0.116395
TLN1	5.32431e-06	0.387919	0.405	0.203	0.120276
TPI1	5.4535e-06	0.334801	0.362	0.178	0.123195
DENND4A	5.50395e-06	0.29483	0.293	0.129	0.124334
VPS35	5.53715e-06	0.330502	0.336	0.158	0.125084
TANC2	5.70716e-06	0.328099	0.259	0.103	0.128925
RFX3	6.28725e-06	0.257058	0.267	0.111	0.142029
NFATC3	6.46062e-06	0.281369	0.293	0.123	0.145945
ADAM17	6.99686e-06	0.252503	0.259	0.103	0.158059
ARID1A	8.0794e-06	0.355499	0.371	0.191	0.182514
ANP32A	8.08509e-06	0.263848	0.362	0.17	0.182642
PDS5A	8.11993e-06	0.301711	0.345	0.167	0.183429
FAM168A	8.84097e-06	0.282241	0.293	0.129	0.199718
STAT3	9.43152e-06	0.368127	0.336	0.163	0.213058
ARMH4	9.96626e-06	0.304978	0.302	0.139	0.225138
AC078927.1	1.02333e-05	0.311111	0.267	0.113	0.231171
FOS	1.05769e-05	0.256616	0.362	0.176	0.238932
FTX	1.07072e-05	0.392121	0.457	0.268	0.241877
KCTD1	1.09381e-05	0.276531	0.509	0.317	0.247092
RAD51B	1.18924e-05	0.291909	0.293	0.129	0.26865
PREX1	1.21304e-05	0.324966	0.612	0.377	0.274025
PRKN	1.41448e-05	0.311891	0.422	0.23	0.31953
SNHG6	1.42092e-05	0.311949	0.388	0.203	0.320986
BRI3	1.83417e-05	0.266433	0.328	0.152	0.414339
SYVN1	1.8941e-05	0.312263	0.362	0.188	0.427878
AFTPH	1.95277e-05	0.295713	0.302	0.141	0.44113
MTSS1	2.14049e-05	0.330386	0.431	0.243	0.483536
GAK	2.33776e-05	0.3399	0.259	0.114	0.528099
ATP5F1A	2.38987e-05	0.335167	0.336	0.168	0.539871
C17orf49	2.40036e-05	0.285113	0.267	0.114	0.542242
MT-RNR2	2.50778e-05	0.256261	1	0.995	0.566508
SEL1L	2.68778e-05	0.329569	0.293	0.141	0.60717
RPL17-C18orf32	2.8259e-05	0.292367	0.552	0.324	0.638371
JUN	2.89357e-05	0.537661	0.371	0.198	0.653658
TNPO1	3.04652e-05	0.271081	0.336	0.168	0.688209
AC008695.1	3.2634e-05	0.321451	0.371	0.194	0.737201
SETD2	3.33882e-05	0.255571	0.267	0.119	0.754239
PHF20L1	3.66194e-05	0.261168	0.276	0.123	0.827232
CPEB4	3.79021e-05	0.262699	0.284	0.127	0.856209
CCNI	3.79706e-05	0.326707	0.603	0.42	0.857757
SETD5	3.84266e-05	0.302679	0.379	0.203	0.868057
TANC1	3.84555e-05	0.266853	0.259	0.111	0.86871
SPATA13	3.91844e-05	0.280686	0.414	0.227	0.885176
DLEU2	4.0867e-05	0.318218	0.422	0.235	0.923184
BTF3	4.14733e-05	0.297213	0.379	0.204	0.936882
CALR	4.37553e-05	0.389393	0.388	0.224	0.988433
C20orf194	4.39846e-05	0.321485	0.388	0.208	0.993613
PPP1R12A	4.42547e-05	0.286565	0.353	0.185	0.999715
CCT6A	4.63461e-05	0.312166	0.259	0.116	1
UQCRB	4.82584e-05	0.310012	0.284	0.142	1
MYCBP2	5.31307e-05	0.386055	0.414	0.248	1
TMBIM4	5.51734e-05	0.327063	0.293	0.142	1
THOC2	5.89986e-05	0.280189	0.302	0.145	1
NCOA2	6.34693e-05	0.304997	0.345	0.188	1
TRIP12	7.10041e-05	0.362554	0.371	0.204	1
HSPD1	7.1642e-05	0.376343	0.293	0.145	1
AUP1	7.67039e-05	0.252024	0.336	0.176	1
RERE	7.90108e-05	0.320454	0.56	0.377	1
ACSL1	8.1022e-05	0.339718	0.379	0.225	1
SYNRG	8.64889e-05	0.254017	0.284	0.139	1
ZNF609	8.732e-05	0.255557	0.284	0.137	1
YBX1	9.11602e-05	0.335083	0.44	0.271	1
DNAJB6	9.55055e-05	0.562682	0.379	0.229	1
BCL2	0.000119667	0.29747	0.414	0.239	1
DDX3X	0.000120824	0.265631	0.319	0.165	1
RALGAPA2	0.000122789	0.252925	0.259	0.124	1
ADAR	0.000152217	0.264085	0.328	0.17	1
UBA3	0.00019081	0.270075	0.276	0.136	1
FEZ2	0.00020327	0.260264	0.353	0.196	1
MT-TL1	0.000210097	0.345541	0.629	0.471	1
EEF2	0.000212711	0.346594	0.569	0.407	1
RAPGEF6	0.000237025	0.289825	0.319	0.17	1
BRK1	0.000283651	0.306921	0.276	0.144	1
PRPF40A	0.000319154	0.291718	0.276	0.144	1
CTSL	0.000346519	0.2665	0.31	0.17	1
BTG2	0.000350732	0.278685	0.267	0.137	1
GDI2	0.000352717	0.290924	0.328	0.183	1
SERPINB6	0.000387558	0.325672	0.284	0.157	1
ACADVL	0.000392652	0.294872	0.284	0.152	1
COL22A1	0.000399424	0.264673	0.491	0.32	1
COX4I1	0.000407526	0.290303	0.491	0.314	1
GAPDH	0.000410457	0.260934	0.776	0.583	1
LONP2	0.000433583	0.263736	0.293	0.155	1
UVRAG	0.000460449	0.272036	0.345	0.198	1
NT5C2	0.000461423	0.253876	0.302	0.167	1
SERF2	0.000474419	0.298551	0.586	0.418	1
ZBTB16	0.000486682	0.35275	0.379	0.24	1
EP300	0.000494808	0.261125	0.319	0.176	1
XIST	0.000522215	0.259475	0.75	0.564	1
TMBIM6	0.000543765	0.257679	0.716	0.565	1
BCL2L2-PABPN1	0.000549193	0.252437	0.336	0.188	1
PPP6R3	0.000588215	0.263507	0.319	0.183	1
HNRNPA1	0.000622631	0.297367	0.397	0.243	1
CHD7	0.000623507	0.296318	0.405	0.253	1
SPPL3	0.00063545	0.263896	0.293	0.155	1
RPSA	0.000804484	0.251886	0.276	0.147	1
PPP3CA	0.000886401	0.254765	0.388	0.239	1
CUL1	0.00094957	0.260236	0.259	0.142	1
ATP6V0B	0.00101979	0.311699	0.397	0.26	1
BAZ2B	0.00106338	0.256031	0.517	0.353	1
WAC	0.00107932	0.276059	0.457	0.306	1
NF1	0.0014752	0.307048	0.431	0.299	1
PEAK1	0.00198123	0.256659	0.259	0.144	1
NSMCE2	0.00222591	0.251557	0.345	0.211	1
CCAR1	0.00230785	0.262728	0.345	0.214	1
AC120057.2	0.00237372	0.259256	0.664	0.479	1
DNAJB1	0.00281758	0.435698	0.414	0.284	1
GABARAP	0.00319459	0.254157	0.655	0.475	1
SLC44A2	0.00414431	0.410381	0.259	0.158	1
HSP90AA1	0.00513785	0.627327	0.828	0.766	1
ANXA5	0.00546372	0.257725	0.397	0.27	1
CTTNBP2	0.00977367	0.27845	0.259	0.165	1
TRA2B	0.0133965	0.257771	0.276	0.176	1
HSPA8	0.0796204	0.369111	0.457	0.371	1

## Sheet: Microglia 2
row.names	p_val	avg_logFC	pct.1	pct.2	p_val_adj
CD74	2.89771e-15	0.509019	0.83	0.363	6.54592e-11
SORL1	2.05266e-12	0.446185	0.766	0.379	4.63695e-08
HLA-B	6.90736e-12	0.871528	0.617	0.274	1.56037e-07
ZFP36L1	1.42431e-11	0.592462	0.617	0.26	3.21752e-07
RNASET2	2.58074e-11	0.493831	0.66	0.267	5.82988e-07
APOE	5.19991e-11	0.529926	0.596	0.243	1.17466e-06
CHST11	9.01008e-11	0.548697	0.521	0.207	2.03538e-06
TPT1	1.0433e-10	0.628424	0.84	0.609	2.35681e-06
C3	1.09328e-09	0.49494	0.511	0.203	2.46972e-05
HLA-DRA	1.12234e-09	0.537181	0.543	0.233	2.53537e-05
APBB1IP	2.66718e-09	0.481858	0.521	0.218	6.02517e-05
CELF2	5.45391e-09	0.504082	0.532	0.229	0.000123204
RPL37	6.00201e-09	0.614053	0.734	0.472	0.000135585
RPL31	6.02252e-09	0.649242	0.691	0.438	0.000136049
RPS24	6.68997e-09	0.626913	0.66	0.416	0.000151126
C1QA	1.47383e-08	0.560119	0.436	0.178	0.000332937
RPLP1	2.76784e-08	0.610849	0.702	0.483	0.000625255
DOCK8	4.56858e-08	0.452237	0.426	0.185	0.00103204
CD53	6.54104e-08	0.490022	0.404	0.164	0.00147762
INPP5D	6.66772e-08	0.48184	0.457	0.202	0.00150624
IKZF1	1.15714e-07	0.547023	0.309	0.115	0.00261398
PLEKHO1	1.16749e-07	0.712717	0.255	0.085	0.00263736
HLA-DPA1	1.33675e-07	0.373056	0.5	0.222	0.00301972
RPL32	1.71728e-07	0.647554	0.628	0.412	0.00387934
CYBA	1.91349e-07	0.535256	0.319	0.121	0.00432258
RPL34	2.46146e-07	0.690286	0.628	0.47	0.00556044
ALOX5AP	2.71961e-07	0.499824	0.34	0.139	0.0061436
HLA-C	3.92171e-07	0.706303	0.457	0.235	0.00885914
LRCH1	4.58596e-07	0.494016	0.287	0.107	0.0103597
MEF2C	5.48455e-07	0.497187	0.426	0.194	0.0123896
FGD4	5.67771e-07	0.473006	0.468	0.233	0.0128259
SFMBT2	6.54954e-07	0.462347	0.489	0.244	0.0147954
RPLP2	9.18741e-07	0.539794	0.649	0.464	0.0207544
GRK2	9.55914e-07	0.536875	0.266	0.101	0.0215941
FRMD4A	1.00763e-06	0.389916	0.617	0.356	0.0227624
ZFP36L2	1.08644e-06	0.464512	0.543	0.301	0.0245427
LRMDA	1.64154e-06	0.372209	0.489	0.238	0.0370824
AKAP13	1.88632e-06	0.344273	0.415	0.191	0.0426121
RPL13	2.5275e-06	0.649481	0.66	0.481	0.0570962
RPL38	2.86981e-06	0.648261	0.638	0.489	0.064829
ARHGAP24	3.13242e-06	0.389224	0.489	0.248	0.0707614
ADORA3	3.26472e-06	0.590666	0.34	0.155	0.07375
B2M	3.31991e-06	0.772696	0.723	0.557	0.0749968
HLA-E	4.70057e-06	0.480229	0.351	0.164	0.106186
A2M	4.76881e-06	0.350854	0.415	0.188	0.107727
CTSB	5.34456e-06	0.365757	0.5	0.262	0.120734
RPS20	7.61976e-06	0.680708	0.532	0.368	0.17213
ARHGDIB	8.41847e-06	0.564635	0.319	0.148	0.190173
C1QB	8.55216e-06	0.297561	0.447	0.211	0.193193
ERICH1	1.07967e-05	0.457833	0.255	0.107	0.243898
LAPTM5	1.5817e-05	0.329447	0.415	0.202	0.357305
RPS11	1.59271e-05	0.522151	0.67	0.506	0.359794
TMSB10	1.62837e-05	0.467981	0.489	0.295	0.367848
RPS17	1.73356e-05	0.598911	0.436	0.254	0.391611
LPAR6	1.75806e-05	0.618913	0.298	0.14	0.397147
AL159163.1	1.79073e-05	0.255037	0.436	0.21	0.404525
FOXN3	1.98396e-05	0.290618	0.532	0.314	0.448176
RPS12	2.14208e-05	0.67392	0.585	0.448	0.483897
RPL27A	2.24171e-05	0.614921	0.553	0.396	0.506402
RPL23	2.39438e-05	0.606853	0.585	0.415	0.540891
HLA-DPB1	2.73838e-05	0.337178	0.34	0.159	0.6186
DENND3	3.00602e-05	0.48459	0.351	0.174	0.679061
C1QC	3.47577e-05	0.459115	0.372	0.185	0.785176
APOC2	4.1166e-05	0.402817	0.277	0.121	0.929941
APOC4-APOC2	4.1166e-05	0.402817	0.277	0.121	0.929941
IFNGR1	4.21799e-05	0.489215	0.383	0.215	0.952844
PTPRC	5.0364e-05	0.530433	0.351	0.183	1
TBXAS1	5.36293e-05	0.32124	0.372	0.189	1
KCTD12	6.2093e-05	0.413734	0.372	0.189	1
AC110749.1	6.31555e-05	0.466319	0.298	0.144	1
ARHGAP15	6.32187e-05	0.431174	0.383	0.203	1
FYB1	6.7226e-05	0.414102	0.394	0.21	1
FAM149A	7.19294e-05	0.38993	0.266	0.118	1
RPS19	7.79557e-05	0.525022	0.543	0.401	1
TYROBP	7.90102e-05	0.511037	0.394	0.207	1
SP100	9.42896e-05	0.388164	0.266	0.123	1
SYK	0.000159047	0.298625	0.319	0.158	1
RPL35A	0.000170984	0.507735	0.5	0.358	1
MT-RNR2	0.000173824	0.288964	1	0.995	1
MAF	0.000218011	0.261615	0.34	0.175	1
S100A11	0.000222732	0.560382	0.298	0.156	1
SLC4A7	0.000231161	0.402505	0.255	0.121	1
RPL26	0.000269388	0.548253	0.447	0.32	1
RPL35	0.000284299	0.377717	0.521	0.355	1
MARCKS	0.000331652	0.375081	0.415	0.251	1
RPL30	0.000371261	0.551358	0.585	0.478	1
ST6GAL1	0.000373134	0.34265	0.362	0.196	1
AL137230.2	0.000422851	0.2578	0.383	0.222	1
RPS15A	0.000491386	0.570688	0.5	0.372	1
AC138811.2	0.00056106	0.51201	0.479	0.352	1
LHFPL2	0.000635006	0.25468	0.372	0.202	1
COTL1	0.000703491	0.331758	0.255	0.131	1
RPL7A	0.000729603	0.548655	0.436	0.319	1
FCER1G	0.00073338	0.268073	0.298	0.155	1
AC245033.1	0.000734915	0.541468	0.372	0.235	1
ETV6	0.000784642	0.354874	0.351	0.203	1
BACH1	0.000832379	0.355778	0.266	0.142	1
RPL23A	0.00084268	0.490334	0.404	0.278	1
LNCAROD	0.000904811	0.323497	0.266	0.136	1
ABR	0.000998136	0.367908	0.319	0.178	1
CYFIP1	0.0010134	0.285279	0.394	0.233	1
RPL36	0.00134062	0.48201	0.415	0.308	1
CST3	0.00140419	0.361546	0.33	0.188	1
CAMK1D	0.00166783	0.399078	0.255	0.142	1
PLXDC2	0.00171305	0.308604	0.681	0.576	1
RPL12	0.00186144	0.411976	0.404	0.279	1
CD14	0.00186442	0.384612	0.277	0.147	1
LPCAT2	0.00204063	0.419676	0.33	0.205	1
TMSB4X	0.00242133	0.363473	0.511	0.393	1
SMAP2	0.00255159	0.415339	0.266	0.148	1
ADAM28	0.00257064	0.353602	0.309	0.178	1
ZFHX3	0.00266913	0.3402	0.468	0.317	1
FCGR3A	0.00274596	0.377455	0.266	0.151	1
RUNX1	0.00298176	0.449736	0.34	0.21	1
ITPR2	0.0035361	0.352803	0.383	0.263	1
HCLS1	0.00355324	0.286736	0.277	0.159	1
SLC25A37	0.00397911	0.416768	0.319	0.205	1
MT-TL1	0.00408718	0.318832	0.564	0.486	1
RPL27	0.00477694	0.437012	0.457	0.353	1
RPS29	0.0058192	0.599268	0.489	0.421	1
RPL18	0.00733287	0.277035	0.5	0.391	1
RPS3	0.00736015	0.386828	0.468	0.377	1
DIAPH2	0.00778242	0.288838	0.309	0.191	1
SRGAP2	0.00807318	0.316408	0.33	0.219	1
RPS4X	0.00920108	0.39979	0.457	0.374	1
MYCBP2	0.00998014	0.321212	0.362	0.262	1
RPS27A	0.0103312	0.461671	0.532	0.483	1
AC005070.1	0.0105567	0.406938	0.277	0.189	1
RPS6	0.0109524	0.315415	0.691	0.631	1
RPS16	0.011676	0.262465	0.585	0.497	1
RPL37A	0.0117496	0.377843	0.543	0.489	1
IFI16	0.0132615	0.390347	0.266	0.172	1
RPS7	0.0140272	0.426093	0.372	0.292	1
RPL8	0.0151907	0.263806	0.404	0.292	1
RPS28	0.0156319	0.267634	0.33	0.232	1
CMIP	0.0172454	0.291849	0.298	0.207	1
GRN	0.0187155	0.346056	0.319	0.219	1
AP002990.1	0.0214556	0.299976	0.319	0.232	1
EEF1G	0.0214556	0.299976	0.319	0.232	1
SKAP2	0.022422	0.265365	0.277	0.181	1
RPS21	0.0238528	0.370744	0.436	0.356	1
TAB2	0.0288997	0.336343	0.266	0.183	1
RPL11	0.0294937	0.351747	0.532	0.478	1
GPX1	0.0314421	0.257702	0.309	0.203	1
AC135178.2	0.0325857	0.285858	0.266	0.194	1
HLA-A	0.0362678	0.428888	0.394	0.326	1
RPS14	0.0397484	0.473432	0.468	0.402	1
TBC1D22A	0.0399854	0.340077	0.266	0.191	1
ARHGAP26	0.0420145	0.366913	0.287	0.202	1
RPL4	0.0446123	0.360878	0.479	0.402	1
RPS23	0.0496656	0.426663	0.404	0.363	1
RPL13A	0.0538509	0.384077	0.33	0.281	1
NAP1L1	0.0583612	0.269916	0.362	0.297	1
RPL19	0.0585413	0.333454	0.532	0.505	1
RPS2	0.071374	0.347741	0.457	0.42	1
RPL14P1	0.071685	0.397692	0.394	0.344	1
RPL5	0.0762746	0.261493	0.521	0.472	1
MBNL1	0.0932653	0.263045	0.415	0.36	1
RPS15	0.099328	0.300479	0.404	0.369	1
RPS13	0.110281	0.250751	0.468	0.438	1
RPS18	0.119386	0.406434	0.362	0.322	1
RPLP0P6	0.140346	0.259354	0.383	0.339	1
ATM	0.169079	0.277913	0.298	0.244	1
NPC2	0.182262	0.272935	0.266	0.227	1
RACK1	0.21989	0.293216	0.34	0.331	1
TUBA1B	0.260909	0.315213	0.5	0.505	1
SPP1	0.407958	0.323841	0.702	0.713	1

## Sheet: X
row.names	p_val	avg_logFC	pct.1	pct.2	p_val_adj
LYZ	5.05001e-24	1.42442	0.385	0.052	1.1408e-19
SPINT2	5.47403e-13	1.0061	0.359	0.091	1.23658e-08
HBB	6.11919e-07	4.38693	0.372	0.163	0.0138233

## Sheet: Neuronal
row.names	p_val	avg_logFC	pct.1	pct.2	p_val_adj
CCDC60	2.52201e-38	0.708957	0.263	0.001	5.69723e-34
PCDH15	6.73828e-37	1.51498	0.561	0.058	1.52218e-32
GPC6	8.5182e-36	1.36359	0.474	0.037	1.92426e-31
PRKG1	1.05994e-34	1.20124	0.526	0.054	2.39441e-30
CCSER1	3.59712e-34	1.22962	0.474	0.04	8.12588e-30
GRIP1	1.39412e-32	1.05382	0.386	0.024	3.14933e-28
AC007100.1	4.93591e-32	1.15052	0.404	0.028	1.11502e-27
HMCN1	1.16659e-31	0.819656	0.298	0.01	2.63532e-27
SGCZ	5.8205e-30	0.832049	0.386	0.028	1.31485e-25
CTNNA2	1.86432e-29	1.32883	0.491	0.057	4.21151e-25
SNHG14	2.64914e-29	2.41101	1	0.611	5.98441e-25
GPC5	5.67703e-29	1.47436	0.526	0.067	1.28244e-24
CNTN5	2.25945e-28	1.26437	0.439	0.045	5.10409e-24
CDK14	2.38954e-27	0.866365	0.351	0.025	5.39796e-23
LINC01090	3.13766e-27	0.615734	0.298	0.015	7.08798e-23
AL157944.1	9.16771e-27	0.816688	0.316	0.019	2.07099e-22
AC019330.1	1.76846e-26	0.747925	0.298	0.016	3.99495e-22
MDGA2	6.85382e-26	1.20352	0.386	0.036	1.54828e-21
USH2A	1.20128e-25	1.01064	0.298	0.018	2.71368e-21
THSD7A	1.5945e-25	0.699472	0.263	0.012	3.60198e-21
AL391117.1	1.85944e-25	0.857165	0.316	0.021	4.20047e-21
SOX5	3.0983e-25	1.15915	0.439	0.054	6.99906e-21
CDH12	3.58434e-25	1.18834	0.404	0.043	8.09702e-21
RALYL	1.71095e-24	1.04096	0.298	0.019	3.86504e-20
TENM2	1.96522e-24	1.01937	0.333	0.027	4.43943e-20
LINC02267	2.32115e-24	0.656733	0.263	0.013	5.24347e-20
ROBO2	4.45382e-24	1.40531	0.474	0.072	1.00612e-19
GALNTL6	5.02887e-24	1.1477	0.421	0.051	1.13602e-19
CSMD1	6.23725e-24	1.38222	0.439	0.06	1.409e-19
NRXN1	6.99329e-24	1.12941	0.474	0.069	1.57978e-19
AC034268.2	1.23063e-23	1.25696	0.351	0.033	2.78e-19
CNTN4	1.68068e-23	1.04328	0.351	0.033	3.79665e-19
GRIN2B	1.78869e-23	0.951383	0.281	0.018	4.04066e-19
CASC15	2.27105e-23	1.00599	0.386	0.043	5.1303e-19
DCDC1	3.2236e-23	0.67651	0.263	0.015	7.28212e-19
SORBS2	8.22067e-23	0.743842	0.298	0.022	1.85705e-18
AC016766.1	1.37213e-22	0.768672	0.298	0.022	3.09964e-18
AGBL4	1.88908e-22	0.878475	0.404	0.049	4.26742e-18
AC099520.1	2.32139e-22	0.994825	0.351	0.036	5.24401e-18
ZFPM2-AS1	4.54949e-22	0.709766	0.263	0.016	1.02773e-17
AP005230.1	1.12649e-21	0.643174	0.298	0.024	2.54475e-17
AC018742.1	1.1429e-21	0.889374	0.316	0.028	2.58181e-17
PIK3C2G	4.60373e-21	0.570134	0.263	0.018	1.03998e-16
AQP4-AS1	5.41777e-21	0.900695	0.298	0.025	1.22387e-16
MIR4300HG	8.19835e-21	0.708965	0.316	0.03	1.85201e-16
SGO1-AS1	1.32372e-20	0.966177	0.386	0.049	2.99029e-16
MGAT4C	2.03484e-20	0.676897	0.263	0.019	4.5967e-16
MALRD1	2.10118e-20	0.800142	0.316	0.031	4.74656e-16
EYS	5.80699e-20	1.36441	0.474	0.091	1.3118e-15
DGKB	7.81387e-20	1.01234	0.351	0.043	1.76515e-15
ADCY2	1.90442e-19	0.612273	0.263	0.021	4.30208e-15
NRG1	2.509e-19	1.02733	0.368	0.049	5.66783e-15
GRID2	4.57537e-19	1.22105	0.579	0.137	1.03358e-14
AC011287.1	6.04619e-19	1.04698	0.316	0.036	1.36583e-14
NRG3	8.45573e-19	1.04511	0.316	0.036	1.91015e-14
SYT16	8.69023e-19	1.31023	0.842	0.453	1.96312e-14
AGBL1	9.3392e-19	0.870668	0.263	0.022	2.10973e-14
CDH13	9.34651e-19	0.918202	0.404	0.063	2.11138e-14
FGF14	1.19812e-18	0.679774	0.281	0.027	2.70655e-14
PTPRT	2.06499e-18	0.746318	0.298	0.031	4.66481e-14
LINC02055	2.36507e-18	0.644111	0.298	0.031	5.3427e-14
IKBIP	2.69639e-18	1.62844	0.982	0.839	6.09114e-14
KALRN	2.9195e-18	0.606773	0.298	0.031	6.59516e-14
EGFEM1P	6.76876e-18	0.516982	0.263	0.024	1.52906e-13
TRMT2B	7.7843e-18	0.993139	1	0.967	1.75847e-13
DPP10	9.99458e-18	1.08336	0.421	0.073	2.25778e-13
CSMD3	1.74523e-17	1.13797	0.368	0.058	3.94246e-13
PCDH7	2.60431e-17	0.771026	0.263	0.025	5.88313e-13
DAB1	2.64325e-17	1.08897	0.439	0.088	5.97111e-13
AL445363.1	3.04213e-17	1.57217	0.93	0.738	6.87218e-13
FAM155A	3.52221e-17	0.878956	0.316	0.04	7.95668e-13
ZNF385D	4.56391e-17	0.980649	0.298	0.036	1.03099e-12
SOX6	4.72339e-17	0.536176	0.281	0.03	1.06701e-12
AL591485.1	1.06683e-16	0.991925	0.404	0.075	2.40997e-12
PCSK5	1.24282e-16	0.738769	0.281	0.031	2.80753e-12
ADAMTSL1	1.24796e-16	0.993035	0.351	0.055	2.81915e-12
ZFPM2	1.26017e-16	1.00762	0.351	0.054	2.84673e-12
CNTNAP5	2.12185e-16	0.815878	0.298	0.037	4.79325e-12
GRM7	2.20972e-16	0.715858	0.298	0.037	4.99175e-12
IL1RAPL2	2.62225e-16	1.06855	0.263	0.028	5.92366e-12
UNC5D	5.05619e-16	0.954977	0.298	0.039	1.14219e-11
PRKD1	5.08545e-16	1.06216	0.351	0.055	1.1488e-11
AC007402.1	6.54817e-16	0.949874	0.298	0.04	1.47923e-11
AC016205.1	7.38775e-16	0.840823	0.263	0.028	1.66889e-11
CNTNAP2	7.52849e-16	1.29325	0.632	0.224	1.70069e-11
CFAP299	9.37412e-16	0.775621	0.281	0.034	2.11761e-11
RBMS3	1.08981e-15	1.04284	0.333	0.054	2.46187e-11
MACROD2	1.33897e-15	1.18058	0.474	0.118	3.02472e-11
RBFOX1	1.92381e-15	1.24822	0.614	0.221	4.3459e-11
PKN2-AS1	3.54527e-15	1.00086	0.316	0.048	8.00876e-11
PLCB1	5.44213e-15	0.638873	0.263	0.031	1.22938e-10
AC098650.1	5.55388e-15	0.971918	0.333	0.055	1.25462e-10
AL390957.1	1.02232e-14	0.934719	0.316	0.049	2.30942e-10
LINC02511	1.08302e-14	0.7753	0.281	0.037	2.44655e-10
AC116362.1	1.15064e-14	0.918853	0.333	0.055	2.5993e-10
ADGRL2	1.20377e-14	0.898947	0.351	0.063	2.71932e-10
SWAP70	1.2438e-14	1.40259	0.895	0.763	2.80974e-10
SPAG16	1.93037e-14	0.746041	0.386	0.076	4.36071e-10
LRRTM4	2.57962e-14	0.720172	0.316	0.049	5.82735e-10
EPHA6	3.19352e-14	1.07204	0.298	0.046	7.21417e-10
TRPM3	4.22956e-14	0.609587	0.263	0.034	9.55459e-10
PALLD	1.83088e-13	0.66561	0.263	0.036	4.13595e-09
ESRRG	2.19943e-13	0.928761	0.281	0.042	4.96851e-09
AL365295.1	3.69558e-13	0.661897	0.281	0.043	8.3483e-09
LINC01122	5.23263e-13	0.75255	0.281	0.045	1.18205e-08
FILIP1L	9.48762e-13	0.903532	0.351	0.073	2.14325e-08
LRP1B	1.8146e-12	1.09003	0.544	0.191	4.09919e-08
KCNQ5	2.16645e-12	0.701863	0.263	0.04	4.89401e-08
CPA6	2.55131e-12	0.780177	0.333	0.067	5.7634e-08
OTOA	4.19655e-12	1.29514	0.667	0.355	9.48001e-08
FUT9	4.2406e-12	0.911956	0.456	0.136	9.57952e-08
SGCD	7.87686e-12	0.742554	0.333	0.072	1.77938e-07
PTPRG	9.32458e-12	0.509227	0.281	0.046	2.10642e-07
NEGR1	1.9017e-11	1.00037	0.421	0.113	4.29594e-07
DLGAP1	2.38551e-11	0.742942	0.316	0.064	5.38887e-07
KHDRBS2	3.47278e-11	0.50423	0.263	0.045	7.84502e-07
AL589740.1	8.24756e-11	1.08304	0.386	0.107	1.86312e-06
CPNE4	1.12403e-10	1.00352	0.281	0.057	2.53917e-06
RORA	1.17866e-10	0.872298	0.421	0.125	2.6626e-06
ERC2	3.30292e-10	0.595529	0.298	0.064	7.46129e-06
CCDC26	4.99711e-10	0.533168	0.263	0.049	1.12885e-05
IL22RA1	9.83351e-10	1.01778	0.86	0.686	2.22139e-05
AL355499.2	1.0907e-09	0.582212	0.298	0.067	2.46389e-05
PDE4D	1.8859e-09	0.806789	0.386	0.116	4.26026e-05
AF241726.2	5.98387e-09	0.649836	0.351	0.101	0.000135176
SEC24D	7.80423e-09	1.05841	0.895	0.702	0.000176298
STPG2	7.8378e-09	0.457263	0.263	0.057	0.000177056
P2RY8	1.51664e-08	0.944231	0.596	0.319	0.00034261
PARD3	1.84835e-08	0.56106	0.263	0.061	0.000417541
AL512328.1	2.06887e-08	0.760882	1	0.924	0.000467357
BRD8	3.25086e-08	0.951861	0.684	0.435	0.00073437
AL356534.1	4.06095e-08	0.932233	0.263	0.066	0.00091737
FOXP2	4.34604e-08	0.757024	0.386	0.124	0.000981771
SBF2	6.09388e-08	0.715519	0.579	0.298	0.00137661
LRRC4C	6.34613e-08	0.853079	0.333	0.106	0.00143359
AL136442.1	1.19452e-07	0.897779	0.807	0.639	0.00269842
PTCH2	5.12792e-07	1.26506	0.684	0.55	0.011584
AC115220.2	7.12042e-07	0.778117	0.719	0.56	0.016085
PARD3B	7.6576e-07	0.73003	0.368	0.137	0.0172985
DIAPH2	1.55148e-06	0.572842	0.439	0.186	0.035048
DPP6	1.88258e-06	0.675743	0.404	0.162	0.0425274
SDK1	2.78954e-06	0.433946	0.316	0.106	0.0630157
BIRC5	3.22618e-06	0.756063	0.421	0.207	0.0728794
ADGRL3	3.33478e-06	0.788285	0.281	0.092	0.0753326
PTPRM	4.9303e-06	0.832601	0.298	0.109	0.111376
PHACTR1	5.8865e-06	0.486012	0.316	0.116	0.132976
SLC8A1	7.62035e-06	0.397287	0.421	0.168	0.172144
AC025946.1	9.11152e-06	0.922034	0.421	0.215	0.205829
KIAA1217	1.33309e-05	0.900468	0.561	0.383	0.301146
HDGFL3	1.39375e-05	0.517406	0.298	0.11	0.314847
PRR5L	1.56917e-05	0.605073	0.421	0.207	0.354476
DCC	2.86126e-05	0.734192	0.298	0.119	0.646359
FANCD2P2	5.56744e-05	0.579305	0.333	0.148	1
PRKN	7.15855e-05	0.873076	0.456	0.244	1
KAZN	8.97068e-05	0.915448	0.404	0.216	1
PRKCE	9.4722e-05	0.452471	0.298	0.121	1
DMD	0.000132379	0.720619	0.474	0.283	1
KCNIP4	0.000166295	0.563293	0.351	0.162	1
EXOC6	0.000169978	0.685716	0.544	0.392	1
KCNMA1	0.000185727	0.456976	0.386	0.186	1
RFX3	0.000309661	0.848079	0.281	0.124	1
TENM3	0.000411968	0.481454	0.316	0.145	1
WBP1L	0.000482719	0.461778	0.281	0.125	1
SMYD3	0.000552219	0.500591	0.263	0.109	1
C4orf45	0.000559526	0.762139	0.474	0.304	1
TCF7L2	0.000638612	0.322081	0.263	0.109	1
ZFHX3	0.000769321	0.435689	0.544	0.319	1
ZNF133	0.000800154	0.429008	0.281	0.13	1
IMMP2L	0.000901152	0.555044	0.351	0.179	1
LRMDA	0.00101106	0.463716	0.456	0.255	1
FBXL17	0.00111867	0.363723	0.263	0.116	1
CLU	0.00130466	0.371887	0.088	0.311	1
LRRC7	0.0013914	0.451179	0.386	0.206	1
AP4B1-AS1	0.00174374	0.570547	0.474	0.358	1
SEC24B	0.00192633	0.420376	0.404	0.244	1
CMSS1	0.0022638	0.417777	0.263	0.125	1
MSI2	0.00227329	0.409081	0.333	0.174	1
SUMF1	0.00289545	0.422419	0.263	0.13	1
DTNA	0.00292062	0.710523	0.298	0.164	1
RNGTT	0.00309696	0.477176	0.351	0.203	1
GALNT13	0.00396136	0.393358	0.281	0.142	1
ARHGAP15	0.00401576	0.697471	0.368	0.215	1
FER	0.0043194	0.570836	0.298	0.152	1
ARL15	0.00436046	0.430753	0.263	0.134	1
COL22A1	0.00567651	0.561726	0.474	0.337	1
MIR99AHG	0.0059418	0.541298	0.421	0.285	1
UNC13D	0.00611527	0.460019	0.684	0.553	1
RYR2	0.00666653	0.301094	0.263	0.139	1
XPR1	0.00830315	0.586655	0.526	0.434	1
NAALADL2	0.00927322	0.630514	0.316	0.189	1
APOLD1	0.00968683	0.525004	0.316	0.191	1
SH3PXD2B	0.00970186	0.385585	0.351	0.228	1
NDUFB5	0.0100823	0.649955	0.439	0.328	1
ASTN2	0.0114225	0.471047	0.263	0.139	1
RAB37	0.0120756	0.540789	0.281	0.174	1
IL15RA	0.01675	0.465446	0.404	0.282	1
AC093227.2	0.0174485	0.591811	0.263	0.162	1
ROBO1	0.0196293	0.644755	0.298	0.194	1
HDAC9	0.0225049	0.448806	0.368	0.252	1
ERBB4	0.02533	0.431241	0.404	0.28	1
CAST	0.0272175	0.54083	0.316	0.213	1
TRPS1	0.0274292	0.450765	0.263	0.165	1
NAV2	0.0286259	0.338144	0.316	0.194	1
PBX4	0.0313477	0.54321	0.526	0.472	1
MAGI1	0.034395	0.603363	0.316	0.219	1
EXOC4	0.0369855	0.45141	0.351	0.246	1
DLC1	0.0388874	0.340888	0.281	0.179	1
CDKAL1	0.0464679	0.309181	0.263	0.17	1
DSCR9	0.04661	0.586996	0.333	0.25	1
LAMA2	0.053018	0.682585	0.263	0.171	1
LRBA	0.0537674	0.522218	0.263	0.177	1
CNOT1	0.0612846	0.453365	0.263	0.177	1
CADM2	0.0626475	0.267764	0.509	0.386	1
PAAF1	0.0907328	0.405011	0.281	0.195	1
GPHN	0.0961218	0.315237	0.316	0.227	1
CACNA2D1	0.097047	0.38111	0.316	0.23	1
NTM	0.140528	0.541389	0.351	0.273	1
SEMA6D	0.172229	0.393313	0.281	0.212	1
STX8	0.317515	0.58944	0.281	0.235	1
PLCL1	0.473465	0.267027	0.404	0.379	1
GPATCH8	0.61326	0.299611	0.333	0.3	1

## Sheet: Microglia 3
row.names	p_val	avg_logFC	pct.1	pct.2	p_val_adj
NR4A3	4.70331e-94	1.6557	0.875	0.01	1.06248e-89
CCL3	7.60044e-87	2.4886	0.938	0.015	1.71694e-82
PTGS2	1.93255e-73	1.0607	0.562	0.003	4.36563e-69
KLF4	5.78755e-69	1.88207	0.75	0.013	1.30741e-64
CCL3L1	3.24117e-67	1.52823	0.562	0.004	7.3218e-63
ADAMTSL4-AS1	1.04333e-65	1.74819	0.812	0.018	2.35687e-61
GRASP	2.45079e-65	1.3794	0.75	0.014	5.53633e-61
KLF2	2.38771e-64	1.38481	0.812	0.018	5.39383e-60
PTGER4	3.3659e-62	1.12264	0.75	0.015	7.60357e-58
STX11	4.20083e-62	1.04766	0.625	0.008	9.48967e-58
PLEKHG2	3.89136e-58	0.996459	0.5	0.004	8.79058e-54
NR4A1	9.38791e-52	1.99589	1	0.049	2.12073e-47
MAFF	1.42577e-51	1.17235	0.688	0.017	3.22081e-47
NRARP	1.48164e-50	0.83404	0.312	0	3.34703e-46
AC020916.1	2.14605e-50	1.18863	0.625	0.014	4.84793e-46
CD83	1.17998e-48	3.1618	1	0.058	2.66557e-44
SPRY1	4.03833e-46	0.951162	0.5	0.008	9.12259e-42
FOSL2	2.82535e-45	0.678274	0.5	0.008	6.38246e-41
FOSB	7.12836e-45	2.75976	1	0.065	1.6103e-40
CD69	1.35322e-42	1.63174	0.75	0.031	3.05692e-38
CDKN1A	2.41158e-42	1.50482	0.812	0.038	5.44776e-38
FAM71A	4.31056e-42	0.665886	0.312	0.001	9.73756e-38
ZNF331	6.05083e-42	2.31656	1	0.07	1.36688e-37
NR4A2	1.48054e-41	2.42839	1	0.072	3.34453e-37
GPR183	2.13033e-41	1.73273	0.938	0.055	4.81242e-37
CH25H	2.02662e-40	0.731503	0.438	0.007	4.57814e-36
VEGFA	6.46132e-39	1.39538	0.75	0.035	1.45961e-34
PLAUR	6.4804e-39	1.25309	0.688	0.028	1.46392e-34
IL1B	1.80174e-38	1.20528	0.562	0.017	4.07013e-34
NEDD9	5.37662e-37	1.90324	0.812	0.046	1.21458e-32
EZR	1.32378e-35	1.11943	0.812	0.045	2.99043e-31
DUSP2	8.59081e-35	0.67639	0.438	0.01	1.94066e-30
ZFP36	2.92721e-34	2.2968	1	0.09	6.61257e-30
OTUD1	1.82448e-33	1.38831	0.75	0.044	4.12149e-29
FAM110B	4.94179e-33	1.2569	0.75	0.044	1.11635e-28
AL137129.1	8.41581e-33	1.27401	0.688	0.035	1.90113e-28
OLR1	8.61603e-33	2.47487	0.875	0.072	1.94636e-28
EGR1	1.00095e-32	1.937	0.75	0.045	2.26114e-28
LPCAT1	1.27636e-32	0.9721	0.625	0.028	2.88329e-28
PPM1N	1.53184e-31	1.2725	0.625	0.029	3.46044e-27
LINC01619	1.80062e-31	1.09483	0.625	0.029	4.0676e-27
IER2	2.8577e-31	1.80645	0.875	0.069	6.45555e-27
SLC7A5	4.91393e-31	1.6376	0.875	0.07	1.11006e-26
AD000864.1	5.47212e-31	1.12993	0.562	0.024	1.23615e-26
RNF122	1.03658e-30	0.83057	0.438	0.013	2.34164e-26
BHLHE40	1.84488e-30	0.83063	0.562	0.024	4.16758e-26
CXCR4	3.77994e-29	1.99232	0.875	0.079	8.53889e-25
PDPN	9.25624e-29	0.75552	0.625	0.032	2.09098e-24
BASP1	1.26229e-28	1.40861	0.875	0.076	2.85152e-24
SLC2A3	1.37267e-28	2.11409	0.875	0.083	3.10086e-24
FAM49A	1.86672e-28	1.21743	0.75	0.053	4.21692e-24
STK17B	2.30359e-28	1.13066	0.625	0.034	5.2038e-24
ATF3	4.15666e-28	1.67591	0.938	0.097	9.38989e-24
AC129492.1	8.8188e-28	1.78354	1	0.125	1.99217e-23
SEMA4A	1.33609e-27	0.629305	0.375	0.01	3.01823e-23
SPRED2	2.87923e-27	0.935509	0.625	0.035	6.50418e-23
TFRC	6.35244e-27	1.3988	0.562	0.029	1.43502e-22
RILPL2	7.65979e-27	0.721921	0.562	0.028	1.73035e-22
KLF10	1.05051e-26	0.623313	0.5	0.021	2.3731e-22
HIST1H1C	1.95933e-26	1.49815	0.75	0.06	4.42613e-22
TRIB1	2.66364e-26	1.12734	0.625	0.038	6.01716e-22
JUNB	5.61312e-26	2.30998	1	0.139	1.268e-21
EIF4A3	9.82316e-26	1.15987	0.688	0.051	2.21905e-21
PI4K2A	1.40645e-25	0.632658	0.562	0.029	3.17716e-21
NAMPT	2.83032e-25	1.57965	0.75	0.065	6.3937e-21
TNFRSF10B	3.01913e-25	0.983676	0.5	0.024	6.82021e-21
IL1A	3.44471e-25	0.770542	0.312	0.007	7.78161e-21
RASGEF1B	7.00325e-25	1.40638	0.812	0.077	1.58203e-20
RAPGEF1	8.54384e-25	1.80679	0.938	0.117	1.93005e-20
RFX2	1.13954e-24	1.09075	0.625	0.042	2.57423e-20
USP36	6.11794e-24	1.78831	0.875	0.108	1.38204e-19
SOCS3	2.97735e-23	0.938117	0.5	0.027	6.72584e-19
MAP3K8	4.09825e-23	1.02582	0.625	0.045	9.25794e-19
GNA13	4.47587e-23	1.84683	0.938	0.133	1.0111e-18
MB21D2	7.55384e-23	0.626297	0.438	0.02	1.70641e-18
CTSZ	1.71084e-22	0.592799	0.375	0.014	3.86478e-18
KLF6	1.77616e-22	2.63382	1	0.183	4.01234e-18
NFIL3	2.04017e-22	0.898904	0.562	0.037	4.60874e-18
CITED2	3.43633e-22	0.661622	0.375	0.014	7.76266e-18
SLC25A25	3.50723e-22	1.07349	0.625	0.048	7.92283e-18
PACSIN2	5.27913e-22	0.842808	0.812	0.08	1.19255e-17
TAGAP	5.30438e-22	0.873412	0.5	0.028	1.19826e-17
RAB20	5.96814e-22	0.816676	0.5	0.029	1.3482e-17
FOS	6.65803e-22	3.00316	1	0.188	1.50405e-17
AC010733.2	6.90779e-22	0.993677	0.562	0.038	1.56047e-17
SLC11A1	7.12691e-22	1.14741	0.688	0.06	1.60997e-17
RAMP1	7.21807e-22	0.751442	0.438	0.021	1.63056e-17
NLRP3	8.78658e-22	0.807988	0.438	0.021	1.98489e-17
TNFRSF1B	8.81569e-22	1.68931	0.875	0.107	1.99146e-17
RASSF5	2.49946e-21	1.07794	0.5	0.031	5.64628e-17
AC069368.1	4.35128e-21	0.908119	0.312	0.01	9.82953e-17
PLEK	4.8362e-21	1.42772	0.625	0.052	1.0925e-16
REL	5.89996e-21	1.4703	0.812	0.098	1.3328e-16
PPP1R15A	8.76801e-21	1.09093	0.812	0.087	1.98069e-16
RGS1	9.91989e-21	2.51698	1	0.18	2.2409e-16
LRRFIP1	3.07885e-20	1.64152	0.938	0.135	6.95512e-16
PLK3	3.7595e-20	0.731775	0.438	0.024	8.49271e-16
IFI30	6.00695e-20	0.672582	0.438	0.024	1.35697e-15
SPDYA	7.30975e-20	0.684233	0.375	0.017	1.65127e-15
PFKFB3	8.75365e-20	1.93853	1	0.163	1.97745e-15
ELF1	9.73203e-20	1.42116	0.875	0.125	2.19846e-15
TNFAIP3	1.035e-19	1.20962	0.5	0.034	2.33806e-15
PNP	1.32003e-19	0.540391	0.438	0.024	2.98194e-15
DUSP1	1.42982e-19	2.57391	1	0.222	3.22996e-15
RGS16	1.9164e-19	1.50923	0.812	0.101	4.32916e-15
HERPUD1	1.97986e-19	1.78368	1	0.191	4.47251e-15
CCDC138	2.26907e-19	1.23721	0.5	0.035	5.12583e-15
IER5	3.06348e-19	1.54118	0.812	0.103	6.9204e-15
KLHL15	3.1485e-19	0.48755	0.312	0.011	7.11246e-15
YBX3	3.17249e-19	1.06651	0.688	0.067	7.16666e-15
HIST1H2AE	3.30175e-19	0.521407	0.312	0.011	7.45866e-15
STK10	3.90777e-19	0.953773	0.625	0.056	8.82764e-15
ID2	4.70513e-19	1.56952	0.938	0.146	1.06289e-14
HIF1A	5.74544e-19	2.26468	0.938	0.19	1.29789e-14
FAM53C	5.98483e-19	0.75233	0.562	0.045	1.35197e-14
CSRNP1	1.00033e-18	0.892772	0.438	0.027	2.25975e-14
HK2	1.17301e-18	0.971792	0.562	0.046	2.64984e-14
IL3RA	1.23153e-18	0.661213	0.375	0.018	2.78203e-14
KLHL6	1.38359e-18	0.595113	0.375	0.018	3.12553e-14
XBP1	1.40797e-18	0.821511	0.688	0.069	3.18061e-14
SRGN	1.4217e-18	2.74878	0.938	0.194	3.21162e-14
CSF2RA	1.6085e-18	0.983682	0.688	0.07	3.6336e-14
ETS2	1.83969e-18	1.20612	0.688	0.074	4.15586e-14
LDLR	2.75671e-18	0.956562	0.5	0.037	6.22742e-14
JDP2	2.78023e-18	1.40371	0.688	0.073	6.28055e-14
AKAP13	3.40977e-18	1.79103	1	0.202	7.70267e-14
MCL1	3.5116e-18	1.41985	0.812	0.112	7.93271e-14
B3GNT5	3.8746e-18	1.77877	0.812	0.117	8.75273e-14
IER3	4.00459e-18	0.990118	0.625	0.059	9.04637e-14
PTPRC	5.64094e-18	1.45601	1	0.187	1.27429e-13
HIF1A-AS2	7.02621e-18	0.495449	0.438	0.027	1.58722e-13
TNFSF9	7.60442e-18	0.486201	0.312	0.013	1.71784e-13
TTYH3	2.12297e-17	0.574651	0.438	0.028	4.79579e-13
UST	2.16622e-17	1.3941	0.688	0.079	4.8935e-13
B4GALT1	3.704e-17	1.09268	0.688	0.08	8.36733e-13
NFATC1	4.20034e-17	1.19779	0.5	0.039	9.48857e-13
RNF144B	5.2465e-17	0.6949	0.5	0.038	1.18518e-12
AC005258.1	5.56932e-17	0.847392	0.438	0.029	1.25811e-12
LINC02649	5.74252e-17	0.949228	0.438	0.029	1.29724e-12
KDM6B	8.7223e-17	0.798432	0.438	0.031	1.97037e-12
SAT1	9.83345e-17	2.35372	1	0.256	2.22138e-12
RGS2	1.01802e-16	1.5601	0.75	0.104	2.29971e-12
HLA-DMA	1.12294e-16	0.90059	0.812	0.107	2.53672e-12
JMJD6	2.32866e-16	0.640046	0.5	0.041	5.26045e-12
ITGB2-AS1	2.41027e-16	0.438643	0.312	0.014	5.4448e-12
ARG2	2.61617e-16	0.669351	0.375	0.022	5.90992e-12
ADAM9	3.29702e-16	0.978566	0.812	0.119	7.44797e-12
RANBP2	3.38315e-16	1.96429	0.812	0.142	7.64255e-12
DDIT3	3.61788e-16	0.718965	0.5	0.042	8.17279e-12
SYTL3	3.63139e-16	1.16843	0.5	0.045	8.20332e-12
MSR1	9.08745e-16	1.40371	0.625	0.076	2.05286e-11
CEBPD	9.27771e-16	1.38972	0.938	0.164	2.09584e-11
MANBA	9.73669e-16	1.09133	0.812	0.124	2.19952e-11
IPMK	1.13343e-15	0.403844	0.375	0.022	2.56043e-11
HSPA5	1.17209e-15	2.05913	1	0.23	2.64776e-11
LYN	1.67731e-15	1.32952	0.812	0.138	3.78905e-11
LDHA	2.39837e-15	1.05711	0.75	0.104	5.41791e-11
ACSL1	2.7722e-15	1.53769	1	0.233	6.26241e-11
HECA	2.92934e-15	0.967794	0.688	0.091	6.61737e-11
TSC22D2	3.29234e-15	0.921192	0.812	0.121	7.4374e-11
TRA2B	3.53054e-15	1.65917	0.875	0.177	7.9755e-11
ST3GAL1	3.65461e-15	1.00311	0.625	0.072	8.25576e-11
MALT1	3.92468e-15	0.89933	0.5	0.046	8.86584e-11
LIMS1	4.19713e-15	1.00797	0.75	0.105	9.48132e-11
CREM	6.30971e-15	0.714078	0.562	0.058	1.42536e-10
UGCG	6.78881e-15	1.21754	0.688	0.093	1.53359e-10
IRAK2	6.84434e-15	0.859376	0.562	0.059	1.54614e-10
ARFGAP3	1.05998e-14	0.89775	0.625	0.077	2.39451e-10
H3F3A	1.12909e-14	0.581181	0.375	0.025	2.55061e-10
CHSY1	1.25964e-14	1.08685	0.625	0.079	2.84552e-10
SENP3-EIF4A1	1.6316e-14	1.163	0.812	0.152	3.68578e-10
ITPRIP	3.08156e-14	0.877712	0.5	0.051	6.96125e-10
RIPK2	3.1952e-14	0.748334	0.5	0.048	7.21796e-10
HLA-DRB1	3.2396e-14	1.54441	1	0.235	7.31827e-10
CCL4	3.60402e-14	1.86033	0.312	0.018	8.14149e-10
BMF	3.64678e-14	0.622975	0.375	0.027	8.23808e-10
SMAP2	4.58882e-14	0.846886	0.875	0.147	1.03661e-09
ATP13A3	5.19238e-14	0.968988	0.688	0.1	1.17296e-09
OGFRL1	5.30608e-14	1.08769	0.812	0.14	1.19864e-09
TEX14	5.44079e-14	1.56451	0.625	0.08	1.22907e-09
CHST11	7.96933e-14	1.28496	1	0.23	1.80027e-09
HLA-DQA1	1.13632e-13	1.07592	0.688	0.096	2.56695e-09
PDGFB	1.14611e-13	0.891209	0.562	0.065	2.58906e-09
ERCC1	1.47737e-13	0.899888	0.625	0.077	3.33738e-09
UBA52P7	1.51708e-13	0.704615	0.5	0.052	3.42707e-09
H1F0	1.53428e-13	0.875044	0.562	0.063	3.46594e-09
HPGDS	1.64767e-13	0.615618	0.438	0.038	3.7221e-09
ARID5A	2.79369e-13	0.505784	0.375	0.028	6.31096e-09
FPR1	2.98364e-13	0.876521	0.562	0.066	6.74004e-09
TSC22D3	3.56887e-13	1.20402	0.75	0.132	8.06207e-09
TMEM52B	4.1917e-13	0.507913	0.312	0.02	9.46904e-09
FCGR2A	4.19511e-13	1.14814	0.75	0.131	9.47676e-09
HAMP	4.25189e-13	1.05739	0.625	0.086	9.60502e-09
SINHCAF	5.08128e-13	0.455703	0.312	0.02	1.14786e-08
RHBDF2	5.41262e-13	0.953079	0.875	0.164	1.22271e-08
DENND3	6.02879e-13	1.43105	0.875	0.181	1.3619e-08
TMX2-CTNND1	7.17256e-13	0.564073	0.375	0.029	1.62028e-08
TTC7A	7.19408e-13	1.17595	0.875	0.205	1.62514e-08
CLEC2B	7.98466e-13	0.547011	0.375	0.029	1.80373e-08
TOM1	9.0772e-13	0.776905	0.5	0.055	2.05054e-08
AC007192.1	1.04788e-12	0.600424	0.5	0.055	2.36717e-08
UBASH3B	1.1518e-12	0.706584	0.438	0.042	2.60191e-08
MTHFD2	1.4999e-12	0.479058	0.438	0.041	3.38827e-08
NRROS	1.65909e-12	0.558288	0.438	0.042	3.74787e-08
RAB31	1.96054e-12	1.04988	0.812	0.156	4.42886e-08
AC005165.2	2.12553e-12	0.456358	0.312	0.021	4.80157e-08
CLEC7A	2.23148e-12	0.916565	0.562	0.076	5.04092e-08
MIDN	2.48036e-12	0.818861	0.562	0.076	5.60313e-08
INAFM2	2.60143e-12	0.684602	0.375	0.032	5.87662e-08
HBEGF	2.99037e-12	1.11677	0.562	0.073	6.75524e-08
AL135905.2	3.14633e-12	1.06754	0.75	0.138	7.10757e-08
NECTIN2	3.1514e-12	0.372813	0.312	0.021	7.11902e-08
PTP4A1	3.27843e-12	1.06633	0.75	0.138	7.40598e-08
CCNL1	3.4467e-12	0.900838	0.938	0.209	7.78609e-08
AC016831.7	4.23416e-12	1.38419	0.875	0.222	9.56496e-08
YPEL5	4.265e-12	0.857056	0.625	0.094	9.63463e-08
ODC1	5.12958e-12	0.590321	0.375	0.032	1.15877e-07
IL1RAP	5.2534e-12	0.575483	0.438	0.044	1.18674e-07
SNX8	5.95768e-12	0.474605	0.375	0.032	1.34584e-07
RHOH	6.04789e-12	0.33468	0.375	0.031	1.36622e-07
DOCK4	6.30006e-12	1.903	1	0.507	1.42318e-07
HSP90AA2P	7.11825e-12	0.912061	0.562	0.077	1.60801e-07
SAMSN1	7.69159e-12	0.889981	0.562	0.076	1.73753e-07
CTSB	7.91094e-12	1.57779	0.938	0.278	1.78708e-07
LINC-PINT	7.91443e-12	1.36632	0.875	0.23	1.78787e-07
MS4A7	7.97904e-12	0.84313	0.625	0.09	1.80246e-07
FGD4	8.25812e-12	1.2751	0.938	0.249	1.86551e-07
INSIG1	9.50113e-12	1.05311	0.688	0.119	2.14631e-07
PARVB	1.03676e-11	0.455639	0.312	0.022	2.34204e-07
C3AR1	1.13655e-11	0.625969	0.562	0.073	2.56746e-07
MGAT1	1.21921e-11	0.789953	0.688	0.112	2.7542e-07
SCML1	1.23727e-11	0.632823	0.438	0.045	2.79499e-07
LCP1	1.23841e-11	1.00052	0.75	0.133	2.79757e-07
HLA-DQB1	1.24506e-11	1.06572	0.75	0.14	2.81258e-07
SRA1	1.42091e-11	0.536559	0.375	0.034	3.20984e-07
ARHGAP26	1.68013e-11	1.63008	0.812	0.199	3.79541e-07
SERPINE1	1.81973e-11	1.62078	0.5	0.066	4.11077e-07
LGMN	2.13385e-11	0.992559	0.562	0.079	4.82037e-07
HLA-DRB6	2.24155e-11	1.07085	0.688	0.125	5.06366e-07
GTF2B	2.37372e-11	0.819065	0.5	0.062	5.36223e-07
AC016876.2	2.4303e-11	1.16511	0.875	0.23	5.49004e-07
BTG2	2.65649e-11	1.22864	0.75	0.145	6.001e-07
SYAP1	2.66055e-11	0.670047	0.562	0.076	6.01018e-07
EIF4A1	2.66627e-11	1.34432	0.812	0.206	6.0231e-07
PALD1	2.85291e-11	0.77172	0.688	0.111	6.44472e-07
ADAMTS17	2.98082e-11	0.615335	0.312	0.024	6.73366e-07
HLA-C	3.32004e-11	1.08516	1	0.247	7.49998e-07
AMPD2	3.36262e-11	0.663656	0.438	0.048	7.59616e-07
NXF1	3.41421e-11	0.998008	0.625	0.103	7.7127e-07
TMEM140	4.15967e-11	0.732745	0.5	0.063	9.39669e-07
IKBKE	4.37556e-11	0.515615	0.312	0.024	9.88439e-07
LDLRAD4	4.79042e-11	1.54417	1	0.388	1.08216e-06
HIST3H2A	4.87989e-11	0.390095	0.312	0.024	1.10237e-06
RBM47	5.0565e-11	1.03986	0.688	0.122	1.14226e-06
JUN	5.48277e-11	1.75174	0.812	0.212	1.23856e-06
SIPA1L1	5.53461e-11	1.16782	0.75	0.167	1.25027e-06
PHF20	6.04592e-11	0.969444	0.75	0.157	1.36577e-06
RPL22L1	6.0898e-11	0.422493	0.438	0.046	1.37569e-06
ABR	6.17046e-11	0.834495	0.875	0.181	1.39391e-06
C1QA	6.31169e-11	1.02349	0.875	0.197	1.42581e-06
ZFP36L1	6.35103e-11	1.15362	1	0.291	1.4347e-06
PRDM1	6.46285e-11	0.858006	0.438	0.049	1.45996e-06
H3F3B	7.03718e-11	1.88165	1	0.594	1.5897e-06
MIR29B2CHG	7.72186e-11	1.04249	0.625	0.114	1.74437e-06
AC129492.4	7.79748e-11	0.606922	0.5	0.065	1.76145e-06
SLC20A1	7.90798e-11	0.429781	0.5	0.06	1.78641e-06
STOM	8.14397e-11	0.505285	0.75	0.125	1.83972e-06
ARHGAP6	9.91572e-11	0.983774	0.5	0.069	2.23996e-06
AL590385.2	1.03187e-10	1.0832	0.438	0.051	2.331e-06
MAN1A1	1.0501e-10	1.1291	0.562	0.091	2.37218e-06
PTPRE	1.28049e-10	1.03799	0.812	0.197	2.89263e-06
VSIG4	1.38642e-10	0.697201	0.812	0.153	3.13193e-06
HSPH1	1.45118e-10	2.09723	0.812	0.216	3.27823e-06
TBC1D9	1.4775e-10	0.459529	0.438	0.049	3.33768e-06
ZC3HAV1	1.49097e-10	0.833556	0.5	0.069	3.3681e-06
PAPOLG	1.50375e-10	0.578753	0.5	0.066	3.39696e-06
HLA-B	1.52415e-10	1.17565	1	0.303	3.44305e-06
PLCB2	1.60789e-10	0.747655	0.688	0.119	3.63223e-06
BTG1	1.62979e-10	1.13235	0.75	0.17	3.68169e-06
NDEL1	1.79806e-10	0.818941	0.438	0.053	4.06181e-06
SH3RF3	1.88185e-10	0.75352	0.688	0.122	4.25111e-06
CMTM6	2.05564e-10	0.67506	0.688	0.121	4.64369e-06
RUNX1	2.50768e-10	1.0914	0.875	0.212	5.66484e-06
ETV6	2.56808e-10	0.975071	0.875	0.208	5.80129e-06
ATP2B1	2.6487e-10	1.14733	0.625	0.118	5.98342e-06
FAM149A	2.68913e-10	0.872016	0.688	0.125	6.07475e-06
NFKBIA	2.84302e-10	1.67023	0.812	0.226	6.42237e-06
EMD	2.9767e-10	0.593408	0.5	0.067	6.72436e-06
AL159163.1	3.42572e-10	0.866395	0.938	0.223	7.73871e-06
CACUL1	3.60562e-10	0.838929	0.562	0.086	8.14509e-06
PDIA3	3.69871e-10	0.831216	0.688	0.135	8.3554e-06
CMTM7	4.02237e-10	0.601701	0.5	0.067	9.08654e-06
RF01684	4.23508e-10	0.346273	0.312	0.027	9.56704e-06
MYO9B	4.62432e-10	0.826573	0.938	0.242	1.04463e-05
TMEM70	4.99475e-10	0.641614	0.438	0.053	1.12831e-05
RPL3	5.11698e-10	0.810907	0.812	0.183	1.15593e-05
DENND4A	5.30227e-10	0.921562	0.688	0.143	1.19778e-05
INPP5F	5.6684e-10	0.748108	0.375	0.042	1.28049e-05
RASSF3	6.14809e-10	0.840411	0.375	0.042	1.38885e-05
HLA-DMB	6.52012e-10	0.829931	0.688	0.131	1.47289e-05
RLF	7.11135e-10	0.969314	0.625	0.111	1.60646e-05
TMUB1	7.66279e-10	0.440915	0.312	0.028	1.73103e-05
NFKB1	7.76504e-10	0.698694	0.688	0.131	1.75412e-05
UBC	8.4613e-10	1.74139	0.938	0.441	1.91141e-05
SDCBP	8.53528e-10	0.784655	0.625	0.11	1.92812e-05
PADI2	8.56164e-10	1.19603	0.938	0.35	1.93407e-05
PELI1	8.59107e-10	1.21816	0.75	0.162	1.94072e-05
ADAM28	8.92007e-10	0.891624	0.812	0.181	2.01504e-05
HLA-F	9.02963e-10	0.554957	0.438	0.055	2.03979e-05
PIK3CG	1.03069e-09	0.524607	0.375	0.041	2.32833e-05
ARL5B	1.07282e-09	0.413998	0.312	0.029	2.42349e-05
DAGLB	1.1195e-09	0.582732	0.562	0.087	2.52895e-05
FAM102B	1.14042e-09	0.881381	0.438	0.056	2.57622e-05
ADAMTS10	1.35858e-09	0.402569	0.312	0.028	3.06903e-05
ELL2	1.36784e-09	1.54634	0.875	0.298	3.08996e-05
AC008012.1	1.36814e-09	0.431429	0.375	0.041	3.09063e-05
MS4A6E	1.508e-09	0.722639	0.375	0.044	3.40656e-05
HLA-DRA	1.58841e-09	1.17965	0.938	0.258	3.58821e-05
RHOB	1.82982e-09	1.37587	0.875	0.278	4.13356e-05
CKS2	2.05382e-09	0.615709	0.312	0.029	4.63959e-05
BCAT1	2.06545e-09	0.67326	0.375	0.045	4.66585e-05
CELF2	2.11034e-09	1.18298	0.875	0.254	4.76726e-05
RPL21P93	2.19257e-09	0.618187	0.688	0.124	4.95302e-05
ELL	2.20042e-09	0.415785	0.312	0.029	4.97075e-05
TAL1	2.23074e-09	0.619797	0.5	0.073	5.03924e-05
AC073325.2	2.43555e-09	1.56042	0.938	0.43	5.5019e-05
CHD1	2.73416e-09	0.862811	0.688	0.142	6.17648e-05
C9orf72	2.82567e-09	0.806506	0.438	0.06	6.38319e-05
MLXIPL	2.8947e-09	0.562127	0.562	0.09	6.53913e-05
CASS4	3.39551e-09	0.328021	0.312	0.029	7.67045e-05
AL031777.3	3.67055e-09	0.593047	0.312	0.031	8.29178e-05
CTNND1	3.92807e-09	0.819608	0.688	0.152	8.87352e-05
SNHG12	3.98405e-09	1.05541	0.5	0.08	8.99996e-05
BX284668.5	4.58211e-09	0.462584	0.312	0.031	0.00010351
SRGAP2	4.71339e-09	0.754299	0.875	0.219	0.000106475
RNF149	5.29044e-09	1.00408	0.812	0.206	0.000119511
MAML3	5.88699e-09	0.891992	0.875	0.242	0.000132987
CD74	7.93848e-09	1.33186	1	0.41	0.00017933
REV3L	8.00685e-09	0.891184	0.625	0.126	0.000180875
NFKBIZ	8.12691e-09	0.751417	0.5	0.084	0.000183587
AMZ2P1	8.66533e-09	0.684839	0.438	0.065	0.00019575
AL163541.1	8.76224e-09	1.03432	0.562	0.103	0.000197939
YWHAZ	8.89293e-09	0.777524	0.875	0.246	0.000200891
MIR181A1HG	9.29366e-09	1.24989	0.688	0.153	0.000209944
AL136454.1	9.42735e-09	1.02223	0.688	0.166	0.000212964
SLC16A3	9.55041e-09	0.814763	0.438	0.066	0.000215744
STIP1	1.07513e-08	0.668065	0.688	0.14	0.000242871
PDE9A	1.09697e-08	0.387914	0.375	0.045	0.000247806
RF02216	1.15897e-08	0.377689	0.375	0.045	0.000261811
BTBD1	1.17275e-08	0.487381	0.438	0.062	0.000264925
TENT4B	1.20625e-08	0.833861	0.438	0.066	0.000272492
GADD45B	1.23509e-08	0.802113	0.5	0.086	0.000279007
TYROBP	1.4236e-08	0.945628	0.812	0.218	0.00032159
GPX1	1.42717e-08	1.08789	0.75	0.205	0.000322398
RNASET2	1.51992e-08	0.868394	1	0.302	0.00034335
IFRD1	1.52548e-08	1.1299	0.562	0.112	0.000344606
BAZ2A	1.57614e-08	0.543655	0.625	0.117	0.000356051
AC027290.2	1.59174e-08	0.486839	0.375	0.046	0.000359573
RNF138	1.68487e-08	0.571568	0.438	0.067	0.000380613
IRF8	1.70952e-08	0.757883	0.5	0.081	0.000386181
NEAT1	1.7337e-08	1.54843	1	0.581	0.000391642
MARCH3	1.82901e-08	0.887803	0.5	0.087	0.000413173
SLC43A2	1.92275e-08	0.710208	0.375	0.049	0.000434348
MLF1	1.9699e-08	0.484237	0.375	0.048	0.000445
MKNK2	2.016e-08	0.870352	0.562	0.11	0.000455415
ARRDC3	2.05225e-08	0.607845	0.812	0.197	0.000463603
GNB4	2.09244e-08	0.686956	0.562	0.103	0.000472682
ADAM17	2.10285e-08	0.508721	0.625	0.117	0.000475034
AIF1	2.21985e-08	0.538413	0.625	0.118	0.000501464
NEDD4L	2.30729e-08	0.651054	0.5	0.084	0.000521217
USP15	2.35722e-08	0.637247	0.625	0.126	0.000532496
SLC2A5	2.4187e-08	0.69797	0.688	0.149	0.000546384
Z84488.2	2.47353e-08	0.454968	0.312	0.034	0.000558771
CD14	2.77786e-08	0.758377	0.688	0.152	0.00062752
TPM3	3.04528e-08	0.622792	0.562	0.107	0.00068793
MTHFR	3.15812e-08	0.448166	0.375	0.048	0.00071342
SPTAN1	3.37405e-08	0.498518	0.5	0.081	0.000762198
MAFB	3.45009e-08	0.691239	0.5	0.083	0.000779375
RANBP9	3.64443e-08	0.62417	0.562	0.111	0.000823278
JAK1	3.71324e-08	0.682991	0.625	0.133	0.000838822
MYADM	3.71922e-08	1.15959	0.625	0.147	0.000840171
HMGB2	3.74294e-08	0.598226	0.438	0.069	0.000845531
TOP1	3.80511e-08	0.922985	0.75	0.213	0.000859575
HLA-DPB1	3.82047e-08	1.15672	0.688	0.171	0.000863045
HSP90AA4P	3.8614e-08	0.333494	0.312	0.034	0.00087229
IL18	3.87612e-08	1.02215	0.375	0.053	0.000875615
TM6SF1	3.95309e-08	0.544775	0.375	0.051	0.000893002
BAIAP2	4.03225e-08	0.653789	0.438	0.067	0.000910886
GLUL	4.14317e-08	1.48364	0.938	0.52	0.000935942
CLK1	4.19074e-08	0.839271	0.938	0.337	0.000946687
APOE	4.37697e-08	0.783487	0.938	0.274	0.000988757
BNC2	4.55729e-08	0.970535	0.625	0.128	0.00102949
CAMK1D	4.5831e-08	0.888733	0.625	0.146	0.00103532
CYBB	4.66405e-08	0.496353	0.625	0.119	0.00105361
PTPN1	4.88822e-08	0.515588	0.438	0.067	0.00110425
TRIM22	4.94347e-08	0.448238	0.375	0.049	0.00111673
TMEM176B	5.03465e-08	0.648747	0.438	0.067	0.00113733
IFITM2	5.14227e-08	0.699135	0.438	0.07	0.00116164
PLIN2	6.04932e-08	1.00737	0.375	0.056	0.00136654
P4HA1	6.21673e-08	1.66233	0.625	0.162	0.00140436
MEF2A	6.85104e-08	0.693003	0.938	0.279	0.00154765
CTNNB1	6.87763e-08	0.939509	0.625	0.153	0.00155366
SYK	6.98818e-08	0.539553	0.75	0.166	0.00157863
ANKRD11	7.06819e-08	0.932194	0.812	0.237	0.0015967
BCAS2	7.51183e-08	0.765056	0.5	0.094	0.00169692
ITGAX	7.54178e-08	0.978281	0.562	0.111	0.00170369
SLC8A1	7.62746e-08	0.838777	0.688	0.177	0.00172304
SNX25	8.22853e-08	0.404338	0.375	0.051	0.00185882
CEBPB	9.29498e-08	0.508104	0.5	0.086	0.00209974
TRAF3	9.40044e-08	0.4183	0.312	0.037	0.00212356
PABPC1	9.40641e-08	0.990389	1	0.435	0.00212491
CTTNBP2NL	9.64862e-08	0.851202	0.562	0.125	0.00217962
BID	9.76327e-08	0.594157	0.312	0.037	0.00220552
ETF1	9.90383e-08	0.818401	0.438	0.074	0.00223727
MYO1F	1.00055e-07	0.558536	0.5	0.087	0.00226025
RPLP1P11	1.02038e-07	0.725282	0.812	0.213	0.00230503
ARIH1	1.02902e-07	1.0785	0.688	0.201	0.00232456
KDM4B	1.03994e-07	0.664996	0.562	0.115	0.00234923
POU2F2	1.05442e-07	0.555813	0.625	0.125	0.00238193
LONRF1	1.09349e-07	0.371376	0.312	0.037	0.0024702
LAT2	1.14962e-07	0.653078	0.562	0.111	0.00259699
CNST	1.16762e-07	0.537944	0.375	0.053	0.00263765
RIOK1	1.24809e-07	0.544209	0.312	0.038	0.00281944
ABCC4	1.24877e-07	0.867215	0.562	0.118	0.00282098
SLC15A3	1.25439e-07	0.396844	0.375	0.052	0.00283366
DDX3X	1.32848e-07	0.765937	0.688	0.178	0.00300103
MEF2C	1.51657e-07	0.964607	0.75	0.212	0.00342593
LONP1	1.52914e-07	0.415359	0.375	0.053	0.00345433
RUNX2	1.61069e-07	0.441335	0.562	0.105	0.00363855
OSBPL3	1.62284e-07	0.840506	0.5	0.096	0.00366599
FOXP2	1.67265e-07	0.666499	0.625	0.133	0.00377852
AL365440.1	1.67541e-07	0.37609	0.312	0.038	0.00378475
EIF2AK3	1.69979e-07	0.405697	0.375	0.052	0.00383983
SUSD6	1.74537e-07	0.625404	0.625	0.133	0.0039428
HMGCR	1.80259e-07	0.427775	0.312	0.038	0.00407204
Z93930.2	1.81173e-07	0.3043	0.312	0.037	0.0040927
CDK16	1.84648e-07	0.575994	0.375	0.055	0.0041712
TREM2	1.95427e-07	0.595857	0.625	0.135	0.0044147
IFITM3	2.02778e-07	0.944454	0.562	0.122	0.00458076
TRPM2	2.09297e-07	0.53578	0.312	0.039	0.00472803
GUK1	2.18024e-07	0.641762	0.562	0.125	0.00492517
PLEKHA2	2.18228e-07	0.461339	0.438	0.07	0.00492976
ARAP1	2.22669e-07	0.511262	0.625	0.133	0.00503009
IGSF21	2.23117e-07	0.482457	0.438	0.072	0.00504021
CABLES1	2.33001e-07	0.52185	0.312	0.039	0.00526349
CD300A	2.37217e-07	0.357295	0.375	0.053	0.00535873
RUBCNL	2.40938e-07	0.433402	0.375	0.053	0.00544278
HIST1H2BG	2.43902e-07	0.51698	0.375	0.055	0.00550974
CXCL16	2.45909e-07	0.672218	0.625	0.146	0.00555509
AL645941.2	2.55417e-07	0.555168	0.375	0.055	0.00576987
HLA-DPA1	2.60659e-07	1.15492	0.812	0.246	0.00588829
SSH2	2.69653e-07	0.964984	1	0.451	0.00609146
C1QB	2.92707e-07	0.822132	0.812	0.229	0.00661224
SH2B3	3.13253e-07	0.818265	0.5	0.097	0.00707638
CD4	3.36937e-07	0.762676	0.625	0.142	0.0076114
MAPKAPK2	3.45109e-07	0.720579	0.438	0.076	0.00779602
FOXN3	3.61802e-07	0.955566	0.938	0.329	0.0081731
TAB2	3.8614e-07	0.817373	0.688	0.183	0.00872289
AZIN1	4.29308e-07	0.527799	0.625	0.139	0.00969807
CEP170	4.30348e-07	0.609507	0.688	0.164	0.00972156
TTC7B	4.57949e-07	0.572807	0.438	0.077	0.0103451
ELOC	5.02866e-07	0.4846	0.5	0.097	0.0113597
ARHGAP12	5.23625e-07	0.403497	0.562	0.11	0.0118287
IL10RA	5.24119e-07	0.372222	0.312	0.041	0.0118399
RELT	5.61193e-07	0.348446	0.312	0.041	0.0126774
USP6NL	5.80305e-07	0.598257	0.438	0.08	0.0131091
IRS2	5.91277e-07	0.834059	0.75	0.242	0.0133569
PPARD	5.99647e-07	0.738472	0.5	0.107	0.013546
AL049873.1	6.00789e-07	0.360498	0.312	0.041	0.0135718
UBBP1	6.04479e-07	1.07591	0.938	0.61	0.0136552
VASP	6.17012e-07	0.543477	0.312	0.042	0.0139383
DDX21	6.44648e-07	0.84451	0.5	0.115	0.0145626
TPT1	6.67051e-07	1.07774	1	0.631	0.0150687
PPP3R1	6.86096e-07	0.384739	0.375	0.058	0.0154989
RPS9	7.01905e-07	0.995345	0.875	0.346	0.015856
AL137230.2	7.22362e-07	0.797396	0.812	0.23	0.0163181
PQLC1	7.42481e-07	0.470753	0.312	0.044	0.0167726
TOB1	7.52918e-07	0.502923	0.5	0.098	0.0170084
SH3TC1	7.62778e-07	0.655004	0.375	0.059	0.0172311
TGFBR1	7.73532e-07	0.785211	0.625	0.159	0.0174741
LRMDA	7.83247e-07	0.839394	0.812	0.258	0.0176935
AC004486.1	7.96423e-07	1.00795	0.562	0.143	0.0179912
LRRK1	8.02066e-07	0.536007	0.5	0.1	0.0181187
ABI1	8.0939e-07	0.767726	0.5	0.108	0.0182841
SLC2A9	8.14828e-07	0.283864	0.312	0.041	0.018407
HCLS1	8.20908e-07	0.52151	0.688	0.163	0.0185443
UCP2	8.25963e-07	0.602988	0.438	0.08	0.0186585
CDV3	8.81485e-07	0.41406	0.5	0.096	0.0199128
ALOX5	8.88613e-07	0.5167	0.5	0.1	0.0200738
MS4A14	9.14761e-07	0.636635	0.375	0.062	0.0206644
UBBP2	9.4398e-07	1.06107	0.875	0.382	0.0213245
AP002807.1	9.56645e-07	0.394772	0.375	0.058	0.0216106
SAMD4A	9.67313e-07	0.532926	0.375	0.062	0.0218516
SERPINA1	1.02416e-06	0.524084	0.438	0.079	0.0231358
CEMIP2	1.04635e-06	0.49526	0.312	0.044	0.0236369
GPCPD1	1.0729e-06	0.572346	0.375	0.063	0.0242367
LAPTM5	1.09067e-06	0.830849	0.75	0.218	0.0246382
FRMD4A	1.09162e-06	0.74756	1	0.376	0.0246597
PIK3R5	1.146e-06	0.469531	0.438	0.079	0.0258881
RF02217	1.16559e-06	0.397108	0.375	0.06	0.0263307
CPVL	1.24185e-06	0.399715	0.562	0.115	0.0280533
DNAJA1	1.32544e-06	1.07038	0.75	0.253	0.0299416
ST20-MTHFS	1.34219e-06	0.358579	0.312	0.042	0.03032
TLR7	1.37781e-06	0.448136	0.375	0.06	0.0311248
IL4R	1.38229e-06	0.482607	0.312	0.045	0.0312259
SRSF3	1.40018e-06	0.627893	0.688	0.194	0.0316302
A2M	1.41209e-06	0.614176	0.75	0.205	0.0318991
ZSWIM6	1.43286e-06	0.81325	0.875	0.381	0.0323682
SLC3A2	1.44282e-06	0.438278	0.438	0.08	0.0325934
CIB1	1.45514e-06	0.562225	0.438	0.083	0.0328716
FTL	1.46602e-06	1.03422	1	0.588	0.0331174
AC116533.1	1.52651e-06	0.314181	0.375	0.059	0.034484
PLSCR1	1.61119e-06	0.673819	0.375	0.066	0.0363967
HSPA9	1.62358e-06	0.548395	0.562	0.132	0.0366766
DDIT4	1.6682e-06	0.732121	0.688	0.205	0.0376847
KCNMA1	1.67728e-06	0.744995	0.688	0.191	0.0378898
VPS26A	1.68169e-06	0.35529	0.438	0.079	0.0379894
G3BP2	1.73618e-06	0.713524	0.5	0.114	0.0392203
ATP1B3	1.77305e-06	0.734158	0.5	0.114	0.0400533
GABARAPL1	1.85169e-06	0.79889	0.562	0.139	0.0418297
NFATC2	1.89969e-06	0.713254	0.5	0.107	0.0429141
RAB3GAP1	2.07338e-06	0.444357	0.562	0.126	0.0468376
LPAR6	2.19178e-06	0.515397	0.625	0.15	0.0495123
JMJD1C	2.20112e-06	1.05063	0.75	0.315	0.0497232
MTHFS	2.21956e-06	0.341076	0.312	0.044	0.0501399
SH3GLB1	2.22141e-06	0.644492	0.5	0.118	0.0501816
MTHFD1L	2.28445e-06	0.689686	0.562	0.136	0.0516057
NFAT5	2.29195e-06	0.782401	0.688	0.211	0.0517752
CD53	2.33868e-06	0.640617	0.688	0.184	0.0528307
UBE2W	2.47969e-06	0.524865	0.438	0.086	0.0560163
SEC24D	2.50877e-06	0.685707	1	0.711	0.056673
AC022826.2	2.56701e-06	0.561543	0.375	0.067	0.0579887
LILRB4	2.60893e-06	0.500751	0.375	0.065	0.0589358
TET2	2.68962e-06	0.580554	0.5	0.114	0.0607584
AL512328.1	2.75556e-06	0.777225	1	0.928	0.0622481
HLA-J	2.84908e-06	0.807929	0.562	0.136	0.0643607
RPL10	2.85929e-06	0.948499	0.938	0.421	0.0645913
LGALS9	2.94347e-06	0.683328	0.625	0.171	0.0664929
ZFP36L2	2.98422e-06	0.994957	0.875	0.32	0.0674136
AP001931.1	3.01463e-06	0.591496	0.562	0.139	0.0681006
IGF2R	3.02207e-06	0.470703	0.438	0.086	0.0682687
DNAJC5	3.12892e-06	0.50356	0.438	0.086	0.0706822
TTC19	3.14321e-06	0.717048	0.812	0.275	0.0710052
CSF3R	3.14369e-06	0.721202	0.5	0.11	0.0710159
FAM78A	3.21888e-06	0.629704	0.312	0.048	0.0727145
PACS1	3.27456e-06	0.334856	0.5	0.101	0.0739723
ANKS1A	3.34742e-06	0.703306	0.438	0.093	0.0756183
PABPC4	3.5034e-06	0.715599	0.5	0.115	0.0791418
PNRC1	3.58575e-06	1.02551	0.75	0.279	0.0810022
EIF4E	3.58761e-06	0.532259	0.375	0.067	0.0810441
NUP98	3.65031e-06	0.561686	0.438	0.087	0.0824604
SPP1	3.82594e-06	1.1321	1	0.705	0.0864281
SMAD3	3.86232e-06	0.528667	0.375	0.065	0.0872497
FCGRT	3.88979e-06	0.616034	0.562	0.131	0.0878703
DNM2	3.89645e-06	0.955019	0.625	0.201	0.0880208
TUT7	3.94423e-06	0.427626	0.5	0.107	0.0891002
CNPY3	3.94755e-06	0.466171	0.625	0.159	0.0891751
TRMT2B	3.96943e-06	0.738977	1	0.969	0.0896695
NAPSB	4.11768e-06	0.568405	0.375	0.069	0.0930183
PMEPA1	4.18504e-06	0.589812	0.438	0.087	0.0945401
PDK3	4.23595e-06	0.49955	0.312	0.049	0.0956901
FCGR3A	4.245e-06	0.917494	0.562	0.157	0.0958945
IRAK3	4.49465e-06	0.33588	0.375	0.063	0.101534
VASH1	4.50007e-06	0.411658	0.438	0.084	0.101657
UBE2B	4.51158e-06	0.593276	0.75	0.23	0.101917
AC005070.1	4.59315e-06	0.543646	0.688	0.19	0.103759
HLA-A	4.88502e-06	0.75881	0.875	0.323	0.110353
PIK3R1	4.90592e-06	1.10122	0.688	0.274	0.110825
UBE2D3	5.11262e-06	0.712663	0.812	0.327	0.115494
RAP1B	5.23155e-06	0.559844	0.438	0.091	0.118181
TIPARP	5.26863e-06	0.437007	0.312	0.049	0.119018
ZNRF2	5.59226e-06	0.729054	0.375	0.07	0.126329
LAP3	5.82087e-06	0.719886	0.375	0.072	0.131493
ZNFX1	5.82928e-06	0.467883	0.312	0.049	0.131683
UBAP1	5.87563e-06	0.547291	0.5	0.117	0.13273
HMOX1	6.13541e-06	0.599156	0.312	0.052	0.138599
GNA12	6.45499e-06	0.461171	0.375	0.069	0.145818
LRMP	6.92564e-06	0.380843	0.312	0.049	0.15645
VMP1	7.17183e-06	0.751179	0.688	0.23	0.162012
AC115220.2	7.65045e-06	0.646026	1	0.563	0.172824
UNC13D	7.72038e-06	0.869561	1	0.553	0.174403
SGK1	7.89004e-06	1.12823	0.812	0.493	0.178236
RB1	7.94147e-06	0.524815	0.562	0.14	0.179398
BACH1	7.96923e-06	0.592642	0.562	0.149	0.180025
PLXDC2	8.0992e-06	0.607941	1	0.58	0.182961
CRY2	8.10175e-06	0.412391	0.312	0.049	0.183019
HCST	8.15529e-06	0.576897	0.375	0.069	0.184228
HEXB	8.17511e-06	0.438697	0.5	0.111	0.184676
H1FX	8.24104e-06	1.10935	0.562	0.177	0.186165
DNAJB6	8.43105e-06	0.692477	0.75	0.242	0.190457
EVI2B	8.77119e-06	0.472979	0.5	0.115	0.198141
HIST1H2BD	8.78709e-06	0.875952	0.438	0.101	0.1985
RPS6KA1	8.99231e-06	0.520866	0.438	0.094	0.203136
PRCP	9.02413e-06	0.257943	0.375	0.066	0.203855
PRRC2C	9.14537e-06	0.954721	0.875	0.367	0.206594
FCGR1A	9.27711e-06	0.477927	0.312	0.051	0.20957
TCIRG1	9.55694e-06	0.430217	0.375	0.069	0.215891
ZFAS1	9.59949e-06	0.5577	0.625	0.171	0.216853
TRAK1	9.74364e-06	0.51023	0.5	0.114	0.220109
RPL12	9.88427e-06	0.746723	0.75	0.285	0.223286
SEC14L1	9.90819e-06	0.618989	0.562	0.157	0.223826
NINJ1	1.02667e-05	0.548841	0.5	0.118	0.231925
TNFAIP2	1.03885e-05	0.566689	0.375	0.072	0.234676
RPS16	1.06254e-05	0.884099	0.938	0.499	0.240027
CDYL	1.07875e-05	0.394491	0.375	0.07	0.243689
CD86	1.09818e-05	0.57286	0.438	0.093	0.248078
RPLP1	1.11952e-05	0.914373	0.938	0.501	0.2529
IFNGR2	1.14536e-05	0.348121	0.438	0.088	0.258737
CUX1	1.20475e-05	0.794881	0.75	0.277	0.272153
RPL11	1.20872e-05	0.699158	1	0.473	0.27305
RPL31	1.23006e-05	0.794551	0.938	0.461	0.27787
STRBP	1.24802e-05	0.593934	0.438	0.094	0.281928
JARID2	1.27425e-05	0.695773	0.562	0.159	0.287852
ZNF710	1.28568e-05	0.545534	0.375	0.074	0.290434
BCL6	1.32001e-05	0.492752	0.5	0.122	0.29819
RPL37	1.32551e-05	0.665236	1	0.494	0.299433
HSP90AB1	1.35006e-05	1.1161	0.938	0.518	0.304978
B2M	1.36874e-05	0.879108	1	0.569	0.309199
UBE2F	1.36933e-05	0.372516	0.375	0.07	0.309333
ST6GAL1	1.40948e-05	0.676383	0.688	0.206	0.318402
RPL23	1.42175e-05	0.527214	1	0.424	0.321174
GPRIN3	1.46018e-05	0.480928	0.438	0.093	0.329854
ENTPD1	1.54665e-05	0.474415	0.5	0.118	0.349389
IFNGR1	1.62639e-05	0.422708	0.75	0.225	0.367402
CMIP	1.71214e-05	0.532273	0.688	0.208	0.386773
ARHGAP4	1.72571e-05	0.365544	0.438	0.093	0.389837
FAM13A	1.74752e-05	1.00021	0.5	0.139	0.394764
RC3H1	1.7601e-05	0.48091	0.438	0.098	0.397606
PEAK1	1.80091e-05	0.739837	0.562	0.153	0.406826
MGST2	1.83822e-05	0.370343	0.312	0.052	0.415255
UBE2O	1.85096e-05	0.418868	0.312	0.053	0.418133
CSF1R	1.87558e-05	0.322832	0.812	0.244	0.423693
GNG2	1.895e-05	0.273345	0.312	0.051	0.42808
PLEKHO1	2.01556e-05	0.500233	0.438	0.1	0.455314
EML4	2.07892e-05	0.523484	0.5	0.126	0.469627
DENND4B	2.13166e-05	0.481999	0.5	0.125	0.481541
CHD2	2.14478e-05	0.80951	0.688	0.236	0.484506
SRGAP2B	2.16484e-05	0.269977	0.5	0.111	0.489037
PTBP3	2.17579e-05	0.468834	0.438	0.098	0.49151
S100A11	2.20291e-05	0.360763	0.625	0.164	0.497638
BTAF1	2.24548e-05	0.37792	0.562	0.145	0.507254
HK1	2.25501e-05	0.347827	0.312	0.053	0.509406
CD37	2.25622e-05	0.366443	0.5	0.117	0.509681
DDX5	2.3129e-05	0.745822	0.938	0.431	0.522484
SLC39A10	2.41983e-05	0.440445	0.438	0.097	0.54664
ARRB2	2.46067e-05	0.582115	0.625	0.19	0.555865
CYFIP1	2.47238e-05	0.589909	0.75	0.243	0.558511
RPS11	2.47457e-05	0.815714	0.938	0.518	0.559005
MICAL1	2.57906e-05	0.330998	0.438	0.093	0.58261
RPL13P12	2.60325e-05	0.330933	0.312	0.053	0.588075
AL450405.1	2.62576e-05	0.603384	0.562	0.15	0.593159
RPL13A	2.62686e-05	0.712479	0.75	0.277	0.593408
THEMIS2	2.72668e-05	0.548147	0.375	0.079	0.615957
SOD2	2.74283e-05	0.76761	0.438	0.112	0.619605
KCTD12	2.78143e-05	0.827049	0.625	0.204	0.628325
PRKCA	2.78275e-05	0.332751	0.625	0.164	0.628623
BTG3	2.81234e-05	0.322288	0.312	0.055	0.635308
CLIC1	2.82727e-05	0.329449	0.375	0.073	0.63868
MALAT1	2.83651e-05	0.805481	1	0.914	0.640767
PCNX2	2.87838e-05	0.394893	0.562	0.143	0.650226
AC138811.2	2.90451e-05	0.818592	0.875	0.357	0.656128
TMIGD3	2.91317e-05	0.44712	0.5	0.122	0.658085
MAP4K3	2.96332e-05	0.711848	0.5	0.142	0.669415
PRKAG2	3.09086e-05	0.636799	0.375	0.083	0.698226
FTH1	3.11744e-05	0.966251	1	0.772	0.70423
RPL17	3.18538e-05	0.62437	0.688	0.228	0.719576
ATP2C1	3.37706e-05	0.770738	0.5	0.136	0.762878
ATF4	3.41006e-05	0.372945	0.5	0.119	0.770333
CSNK1D	3.42776e-05	0.55617	0.438	0.108	0.774332
SORL1	3.44682e-05	0.481961	1	0.416	0.778636
TSPAN14	3.63014e-05	0.400928	0.438	0.096	0.820048
APAF1	3.64634e-05	0.417937	0.438	0.1	0.823708
HIPK3	3.68814e-05	0.414064	0.5	0.118	0.83315
NCK1	3.85349e-05	0.448151	0.312	0.058	0.870503
GBE1	3.98512e-05	0.663429	0.375	0.083	0.90024
RPS2	4.03678e-05	0.710682	0.938	0.413	0.911909
MBOAT7	4.09877e-05	0.446549	0.312	0.058	0.925911
SLC25A6	4.34396e-05	0.637129	0.625	0.191	0.9813
SOAT1	4.41708e-05	0.565799	0.438	0.108	0.997817
PBX4	4.4286e-05	0.590913	1	0.465	1
COTL1	4.46152e-05	0.703913	0.5	0.139	1
RCOR1	4.68478e-05	0.289959	0.312	0.056	1
AC011481.4	4.80658e-05	0.456882	0.5	0.129	1
BIRC5	4.84698e-05	0.445183	0.688	0.213	1
LCP2	4.96132e-05	0.655235	0.312	0.06	1
ENSA	5.08412e-05	0.530321	0.375	0.081	1
SREBF2	5.17758e-05	0.662435	0.562	0.185	1
MFSD14A	5.23125e-05	0.421184	0.438	0.103	1
FOXO3	5.27127e-05	0.770335	0.75	0.316	1
FAM91A1	5.56397e-05	0.303263	0.312	0.058	1
HS3ST4	5.71533e-05	0.462956	0.625	0.18	1
NDUFA6	5.82233e-05	0.388012	0.312	0.059	1
AL445363.1	5.89153e-05	0.384886	1	0.747	1
AC093227.2	5.91821e-05	0.400113	0.562	0.162	1
CIITA	5.9634e-05	0.423783	0.312	0.059	1
BHLHE41	6.60225e-05	0.735481	0.812	0.367	1
KCNQ3	6.92677e-05	0.712082	0.5	0.132	1
CYCS	6.98368e-05	1.02207	0.438	0.124	1
ARHGAP24	7.02335e-05	0.465409	0.812	0.267	1
HCK	7.1364e-05	0.316035	0.375	0.079	1
RPL29	7.22753e-05	0.58888	0.688	0.218	1
TBC1D4	7.29754e-05	0.309869	0.438	0.101	1
HPS5	7.52272e-05	0.525695	0.312	0.063	1
ZCCHC2	7.76902e-05	0.682297	0.375	0.087	1
IL13RA1	7.76921e-05	0.53015	0.5	0.139	1
EHBP1L1	7.86553e-05	0.448948	0.312	0.06	1
SIPA1L2	8.09757e-05	0.506579	0.438	0.108	1
WDR41	8.31139e-05	0.301505	0.312	0.059	1
CPEB3	8.38492e-05	0.529477	0.438	0.111	1
MSN	8.63714e-05	0.475642	0.5	0.138	1
SLC1A3	8.65472e-05	0.740485	0.875	0.471	1
RPS15A	9.00972e-05	0.777428	0.875	0.378	1
MOB1A	9.01599e-05	0.437478	0.375	0.086	1
HSPB1	9.21211e-05	1.5695	0.625	0.274	1
TMSB10	9.22361e-05	0.581062	0.812	0.309	1
SNHG5	9.41534e-05	0.472607	0.562	0.166	1
RPS24	9.49956e-05	0.687567	0.938	0.437	1
BCL2	9.57446e-05	0.751151	0.688	0.257	1
RPS18	9.61438e-05	0.558146	0.812	0.316	1
EPC1	0.000101142	0.593554	0.562	0.178	1
NOP58	0.000101572	0.516217	0.5	0.138	1
SRSF7	0.000104931	0.686979	0.625	0.221	1
DCP2	0.000104939	0.325007	0.312	0.062	1
AL136442.1	0.00010976	0.620636	1	0.645	1
HIST1H2AC	0.000112482	0.75994	0.5	0.15	1
RPL13	0.000112505	0.608107	0.938	0.494	1
GLS	0.000116977	0.490751	0.438	0.115	1
ARHGAP27	0.000117067	0.399104	0.312	0.063	1
AC000120.3	0.000117838	0.250896	0.312	0.059	1
MORF4L2	0.000119022	0.55746	0.625	0.208	1
GRB2	0.00012589	0.619769	0.625	0.222	1
DNAJA4	0.000127542	0.564106	0.312	0.066	1
MFSD1	0.000127856	0.427918	0.438	0.107	1
YTHDC1	0.000133288	0.465537	0.562	0.173	1
AC118553.2	0.000134911	0.407999	0.438	0.111	1
GTPBP1	0.00013606	0.305071	0.312	0.062	1
RHOQ	0.000139352	0.338319	0.438	0.108	1
AFF4	0.00014036	0.542388	0.625	0.219	1
INPP5D	0.000142286	0.534881	0.688	0.225	1
ANOS1	0.000142291	0.305673	0.312	0.062	1
C4orf45	0.000143684	0.485996	0.75	0.308	1
APBB1IP	0.000146431	0.392771	0.75	0.246	1
JUND	0.000148921	0.553992	0.812	0.337	1
CYTH1	0.000149051	0.477978	0.688	0.246	1
PHF11	0.000149517	0.314508	0.312	0.063	1
RPL9	0.000155559	0.389382	0.438	0.112	1
NME2	0.000157376	0.468284	0.5	0.149	1
TMED5	0.000158348	0.415861	0.438	0.118	1
ARPC2	0.000158507	0.544743	0.688	0.239	1
ABHD2	0.000158531	0.462637	0.312	0.066	1
PDS5B	0.000161323	0.503604	0.5	0.15	1
CAPG	0.000165525	0.49349	0.312	0.066	1
RPS14	0.000171862	0.641648	0.875	0.4	1
ADGRG1	0.000174675	0.490019	0.312	0.066	1
VDAC1	0.000179524	0.440788	0.438	0.118	1
GGA2	0.000184184	0.282211	0.312	0.063	1
NME1-NME2	0.000186243	0.460784	0.5	0.15	1
SUCO	0.00019832	0.553106	0.375	0.094	1
RPL35	0.000198549	0.614818	0.812	0.367	1
KMT2C	0.000200751	0.732653	0.688	0.268	1
RPS29	0.000202265	0.756456	0.812	0.421	1
GNAS	0.000205542	0.848572	0.875	0.567	1
CELF1	0.000205643	0.407546	0.625	0.197	1
NUP58	0.000211022	0.418911	0.312	0.067	1
UBE2J1	0.000211563	0.47192	0.375	0.091	1
HAVCR2	0.000214364	0.317997	0.312	0.065	1
IKBIP	0.000214961	0.305706	1	0.847	1
ROCK1	0.000215012	0.602377	0.5	0.162	1
ATP1A1	0.000218944	0.506485	0.625	0.221	1
MPZL1	0.000223237	0.342568	0.312	0.066	1
PHACTR1	0.000227817	0.778264	0.438	0.125	1
DYRK1A	0.000234202	0.668549	0.5	0.146	1
C1QC	0.000236945	0.426815	0.625	0.199	1
CTSS	0.000237847	0.348701	0.312	0.066	1
C3	0.000238489	0.506407	0.688	0.233	1
DHRS3	0.00024184	0.383033	0.312	0.067	1
OTULINL	0.000246238	0.294578	0.312	0.065	1
RELA	0.000256025	0.341064	0.312	0.066	1
DDAH2	0.000256517	0.360059	0.375	0.09	1
RIN3	0.000261155	0.349176	0.375	0.088	1
RPL34	0.000264732	0.581055	0.938	0.48	1
RPS19	0.000264828	0.731498	0.812	0.41	1
GRK2	0.000264854	0.355108	0.438	0.115	1
SMAD7	0.000268008	0.25423	0.312	0.065	1
C1orf162	0.000268273	0.608813	0.438	0.124	1
BRD8	0.000271579	0.535	0.875	0.445	1
UBXN2B	0.000272635	0.308714	0.312	0.066	1
RGS10	0.000276195	0.524442	0.5	0.147	1
SCAF4	0.000277772	0.421725	0.312	0.069	1
RREB1	0.000278676	0.694184	0.375	0.098	1
WAC	0.000290411	0.526371	0.812	0.319	1
MDM2	0.000302266	0.705301	0.438	0.124	1
HSP90AA1	0.000304448	1.6489	1	0.771	1
LPCAT2	0.000305781	0.505452	0.625	0.212	1
ATF6	0.000315389	0.65383	0.562	0.197	1
ARMH3	0.000315724	0.305482	0.375	0.091	1
MOB4	0.000317317	0.521206	0.312	0.072	1
CAPZB	0.000321604	0.514364	0.75	0.309	1
ITGB2	0.000322299	0.482057	0.5	0.149	1
NUFIP2	0.000322493	0.521006	0.625	0.221	1
PDE3B	0.000325348	0.273079	0.312	0.066	1
HSPD1	0.000328102	0.60506	0.5	0.162	1
DBI	0.000338866	0.891992	0.562	0.229	1
RPS20	0.000339297	0.783613	0.75	0.381	1
GGA1	0.000340609	0.373185	0.312	0.069	1
ZFAND6	0.000344921	0.574962	0.375	0.104	1
AC245033.1	0.000345674	0.632144	0.625	0.244	1
AXL	0.000347576	0.343475	0.312	0.069	1
MS4A6A	0.000349452	0.519843	0.5	0.145	1
FBL	0.000352907	0.270571	0.375	0.088	1
ERF	0.000354676	0.35052	0.312	0.069	1
SETD7	0.000359874	0.469196	0.375	0.096	1
HNRNPU	0.000360237	0.558915	0.875	0.399	1
SGPP1	0.000362558	0.385255	0.438	0.121	1
IPCEF1	0.000365749	0.665631	0.438	0.131	1
METTL17	0.000373024	0.325598	0.312	0.069	1
LARP4B	0.000378544	0.263578	0.375	0.09	1
PRKD3	0.000381168	0.330924	0.375	0.094	1
BIRC6	0.000384138	0.403328	0.75	0.279	1
SBF2	0.000385033	0.411061	0.812	0.309	1
ATP6V1A	0.0003852	0.537941	0.375	0.101	1
CHST15	0.000392133	0.259261	0.312	0.067	1
IL22RA1	0.000405854	0.632151	1	0.692	1
STAG1	0.000409329	0.455573	0.625	0.226	1
ZFHX3	0.000414167	0.43524	0.812	0.326	1
GPX4	0.000414893	0.323005	0.562	0.173	1
LMO2	0.000420742	0.295472	0.312	0.069	1
GALNT2	0.00045102	0.453196	0.562	0.191	1
GNS	0.000452507	0.517885	0.438	0.129	1
SFMBT2	0.000453034	0.494763	0.688	0.267	1
MRTFA	0.000459979	0.39197	0.438	0.122	1
FNDC3B	0.000460858	0.281958	0.438	0.117	1
AC013394.1	0.00046291	0.508725	0.438	0.129	1
MEF2D	0.000478262	0.630135	0.375	0.104	1
RPL18A	0.000479351	0.746506	0.5	0.176	1
TCP1	0.000484322	0.566088	0.5	0.166	1
EIF5	0.000485328	0.705174	0.562	0.212	1
HLA-E	0.000506743	0.436172	0.562	0.18	1
PAN3	0.000509846	0.420262	0.562	0.191	1
NAPA	0.000515893	0.392211	0.562	0.185	1
IKZF1	0.000548423	0.536337	0.438	0.133	1
UFC1	0.000550208	0.366817	0.312	0.072	1
RCC2	0.000552112	0.391436	0.312	0.073	1
RABGEF1	0.000559387	0.480275	0.375	0.104	1
UBAP2L	0.000566796	0.421116	0.375	0.101	1
AC110749.1	0.000586347	0.417349	0.5	0.156	1
TBC1D22A	0.000601572	0.468006	0.562	0.192	1
UBE2K	0.000614061	0.544127	0.438	0.139	1
RPLP0P6	0.000618059	0.543879	0.75	0.336	1
LRCH1	0.0006255	0.343883	0.438	0.124	1
ZFAND5	0.000632891	0.536023	0.5	0.176	1
BABAM2	0.000642965	0.35154	0.5	0.146	1
RBM39	0.000643428	0.710877	0.688	0.343	1
POU2F1	0.000647027	0.362427	0.5	0.157	1
DSE	0.000666539	0.699096	0.312	0.081	1
RAB1A	0.000683057	0.537808	0.625	0.229	1
PIAS1	0.000695229	0.520595	0.625	0.243	1
SFPQ	0.000698605	0.480257	0.75	0.295	1
RPL41	0.000710899	0.464874	0.5	0.166	1
P2RX4	0.000718027	0.489733	0.312	0.077	1
KLF3	0.00074332	0.358063	0.5	0.154	1
PUM1	0.000760969	0.465497	0.625	0.242	1
CCNH	0.000764988	0.754921	0.625	0.333	1
HIPK1	0.000773754	0.457885	0.375	0.104	1
ASAP1	0.000790314	0.446974	0.5	0.166	1
CSNK1A1	0.000821722	0.55315	0.625	0.244	1
ANKRD10	0.000825057	0.46368	0.562	0.195	1
RNF145	0.000827759	0.385057	0.5	0.163	1
SLC17A5	0.000830954	0.347625	0.312	0.077	1
RPL7A	0.00085243	0.415917	0.75	0.324	1
WDR45B	0.000860939	0.417855	0.438	0.133	1
RPS17	0.000867146	0.689908	0.625	0.27	1
RYBP	0.000868793	0.423659	0.625	0.233	1
AC027644.4	0.000885053	0.570241	0.438	0.136	1
RABGGTB	0.00088812	0.393752	0.375	0.105	1
TCF25	0.000892172	0.280682	0.562	0.185	1
KLHL24	0.000894855	0.590528	0.625	0.271	1
RNF166	0.00091792	0.404378	0.312	0.077	1
RPS3	0.000920694	0.792123	0.75	0.381	1
RPL32	0.000953121	0.57689	0.812	0.431	1
GPBP1	0.000954812	0.561029	0.562	0.216	1
NCKAP1L	0.00096174	0.296412	0.375	0.101	1
SERPINB9	0.000985651	0.312254	0.375	0.098	1
NUMB	0.00100406	0.386672	0.5	0.169	1
ARHGDIA	0.00100817	0.342423	0.562	0.192	1
EIF1	0.00102137	0.481962	1	0.629	1
MAP3K2	0.00102437	0.643719	0.562	0.232	1
ITPR2	0.00102476	0.513849	0.688	0.27	1
P2RY8	0.00103357	0.419798	0.75	0.331	1
TOMM20	0.00105516	0.258917	0.312	0.076	1
CTSC	0.00107414	0.290793	0.438	0.131	1
AC006001.3	0.001081	0.356433	0.375	0.108	1
MED13L	0.00108467	0.371058	0.812	0.334	1
MAPRE2	0.00110863	0.444494	0.812	0.347	1
SH3BGRL	0.0011112	0.324783	0.5	0.163	1
WBP11	0.00111476	0.466504	0.375	0.108	1
RIN2	0.00115339	0.466839	0.562	0.211	1
YTHDF3	0.00115343	0.389857	0.312	0.081	1
NUP153	0.0011541	0.266776	0.312	0.076	1
COL22A1	0.00116677	0.469652	0.75	0.338	1
NAA50	0.00118523	0.396682	0.375	0.108	1
ENY2	0.00118923	0.294079	0.312	0.077	1
RAB12	0.00121173	0.271773	0.375	0.103	1
SP100	0.00121947	0.428215	0.438	0.135	1
HSPA4	0.00122763	0.663222	0.312	0.09	1
SLCO2B1	0.00123009	0.470529	0.562	0.201	1
RASSF2	0.00124279	0.759921	0.5	0.198	1
NR1H2	0.00125113	0.306761	0.375	0.104	1
DIAPH2	0.00125356	0.3763	0.562	0.198	1
TCF4	0.00128015	0.488785	0.938	0.492	1
APMAP	0.00128929	0.388103	0.562	0.205	1
PCF11	0.00129587	0.311508	0.438	0.133	1
GRK3	0.0012988	0.268314	0.312	0.077	1
AC069288.1	0.00131217	0.485798	0.312	0.087	1
FLOT1	0.00133887	0.378107	0.5	0.163	1
RPL9P9	0.00136836	0.384682	0.312	0.083	1
RPLP0	0.00139316	0.465296	0.438	0.14	1
ESYT2	0.00142256	0.427616	0.375	0.112	1
KPNA4	0.00145458	0.521004	0.375	0.108	1
RPS6	0.00145927	0.680947	0.938	0.632	1
TMC8	0.00146854	0.373071	0.312	0.08	1
HNRNPL	0.00147246	0.490781	0.562	0.213	1
YWHAH	0.00150627	0.443965	0.438	0.145	1
PRAM1	0.00150692	0.451449	0.375	0.11	1
PIK3AP1	0.00151032	0.507523	0.312	0.084	1
STAT3	0.00157281	0.518783	0.5	0.184	1
EEF1A1	0.00161843	0.327768	0.375	0.111	1
TBK1	0.00166114	0.355832	0.312	0.083	1
NLRP1	0.00166923	0.457524	0.312	0.084	1
PAG1	0.00168361	0.744479	0.438	0.157	1
MLXIP	0.00169219	0.397362	0.5	0.178	1
CTSH	0.00169716	0.401044	0.312	0.084	1
MTF2	0.00172738	0.270121	0.375	0.108	1
ATP8B4	0.00179989	0.441124	0.375	0.112	1
CYP51A1	0.00180084	0.2948	0.438	0.136	1
MCF2L	0.00181421	0.410429	0.5	0.169	1
SH3PXD2B	0.00184315	0.502085	0.562	0.23	1
TANC2	0.00184503	0.533052	0.375	0.122	1
CAMK2D	0.00188104	0.250687	0.5	0.163	1
GOLGA4	0.00189666	0.399749	0.688	0.275	1
LPP	0.00189964	0.409437	0.562	0.211	1
ACTR2	0.0019183	0.395892	0.625	0.242	1
SWAP70	0.00192218	0.355817	1	0.768	1
BCLAF1	0.00194117	0.371021	0.562	0.215	1
CPA6	0.00196148	0.307435	0.312	0.083	1
GAA	0.00197747	0.267006	0.438	0.136	1
CYLD	0.00200709	0.427342	0.375	0.121	1
SLC25A5	0.00201434	0.378446	0.5	0.166	1
AC000120.2	0.00201555	0.291437	0.438	0.138	1
MYO1E	0.00210302	0.877467	0.562	0.27	1
ATP2A2	0.00213851	0.463746	0.562	0.229	1
SH3KBP1	0.00217958	0.300552	0.688	0.267	1
WDR26	0.00219161	0.433323	0.375	0.114	1
RPL24	0.00224374	0.57117	0.562	0.247	1
SHOC2	0.0022736	0.260127	0.312	0.083	1
DUSP10	0.00228358	0.456183	0.312	0.086	1
TPM4	0.00228561	0.410566	0.438	0.154	1
TGFBR2	0.00230353	0.358678	0.375	0.114	1
ARL6IP1	0.00231087	0.651758	0.5	0.206	1
SYT16	0.00231364	0.339814	0.875	0.475	1
KDELR1	0.00233894	0.318192	0.375	0.115	1
JAZF1	0.00233899	0.515077	0.562	0.236	1
TMSB4X	0.00234313	0.536405	0.812	0.399	1
CALR	0.00237704	0.747874	0.562	0.243	1
RAF1	0.00240354	0.26148	0.5	0.166	1
IL15RA	0.0024177	0.364366	0.688	0.282	1
TLN2	0.00242329	0.498619	0.438	0.147	1
AC245033.4	0.00242759	0.592722	0.438	0.162	1
TPP1	0.00247403	0.320653	0.312	0.086	1
UBE2A	0.00257439	0.323032	0.312	0.088	1
TAPBP	0.00263461	0.364078	0.312	0.084	1
RPS21	0.00264099	0.668297	0.688	0.36	1
ZMYM2	0.00264463	0.57562	0.5	0.215	1
RBM6	0.00266363	0.465396	0.562	0.229	1
EXOC6	0.00266528	0.408136	0.75	0.396	1
EP300	0.00277872	0.402345	0.5	0.192	1
RPL39	0.0027859	0.267408	0.312	0.084	1
MBNL1	0.00285398	0.585817	0.688	0.36	1
SYNGR2	0.00292965	0.2978	0.562	0.206	1
RPLP2	0.00300435	0.755912	0.812	0.48	1
MAPRE1	0.00301305	0.312434	0.312	0.087	1
ASCC2	0.0030322	0.421813	0.312	0.088	1
AC016708.1	0.00314088	0.605206	0.562	0.242	1
USP53	0.00315935	0.699288	0.312	0.091	1
RPS28	0.00316697	0.311171	0.625	0.236	1
SERP1	0.00318006	0.265304	0.5	0.174	1
AL136115.2	0.00319291	0.391154	0.312	0.09	1
RPS12	0.00328226	0.606161	0.812	0.458	1
RNF111	0.00341002	0.287124	0.375	0.119	1
RPS8	0.00352504	0.608511	0.812	0.504	1
CREBBP	0.00353514	0.464857	0.5	0.215	1
MYL12A	0.00356612	0.352815	0.312	0.091	1
PTCH2	0.00358188	0.293817	0.938	0.552	1
ARHGDIB	0.00362298	0.566583	0.438	0.164	1
PARP8	0.00363382	0.36621	0.312	0.09	1
RASA2	0.00368565	0.631985	0.312	0.101	1
SLC25A3	0.00369744	0.516873	0.562	0.225	1
C5orf15	0.0037205	0.260152	0.375	0.119	1
TEAD4	0.00375688	0.390885	0.375	0.126	1
DNAJC3	0.00376972	0.335735	0.312	0.093	1
PTK2B	0.00380219	0.329377	0.312	0.09	1
RAPGEF2	0.00392109	0.544527	0.438	0.17	1
TUBA1B	0.00392154	0.406651	0.812	0.497	1
SCIN	0.00393851	0.368444	0.438	0.154	1
DNAJB1	0.00404491	1.3783	0.562	0.299	1
UBA52	0.00410927	0.589643	0.688	0.368	1
SUPT5H	0.00421955	0.595304	0.312	0.094	1
BRD2	0.0043127	0.363015	0.438	0.16	1
IL17RA	0.00436518	0.255073	0.5	0.178	1
WAPL	0.00438396	0.261657	0.438	0.146	1
FAM49B	0.00443428	0.375695	0.688	0.303	1
FNBP4	0.00445791	0.315082	0.562	0.23	1
ELF2	0.00451014	0.268861	0.562	0.212	1
CD55	0.00462935	0.632722	0.375	0.129	1
KMT2E	0.00464146	0.556634	0.688	0.327	1
ARPC1B	0.00465773	0.303932	0.375	0.119	1
SKAP2	0.00469042	0.287902	0.5	0.187	1
THADA	0.00469119	0.462069	0.375	0.131	1
IRF2BP2	0.00473525	0.547179	0.562	0.261	1
CHMP1B	0.00476042	0.633552	0.312	0.101	1
GAB2	0.00481848	0.447229	0.688	0.354	1
PSMA7	0.00487148	0.304193	0.5	0.192	1
YY1AP1	0.00487746	0.275965	0.375	0.124	1
CORO1C	0.00489936	0.292676	0.375	0.122	1
IPO7	0.00518086	0.289964	0.375	0.121	1
RPL19	0.00524249	0.639961	0.812	0.501	1
DPP7	0.00547135	0.278887	0.312	0.096	1
BAZ1A	0.00558568	0.417194	0.375	0.132	1
GAK	0.00562024	0.484181	0.375	0.132	1
NAP1L1	0.00567084	0.499824	0.625	0.298	1
ZFAND3	0.00570582	0.37575	0.688	0.316	1
VCP	0.00576905	0.495171	0.438	0.177	1
ZMIZ1	0.00579939	0.351398	0.375	0.131	1
RAP2A	0.00583657	0.275465	0.375	0.126	1
KSR1	0.00587235	0.279057	0.312	0.096	1
UBE2H	0.00592643	0.423719	0.5	0.197	1
APOC2	0.00602687	0.543034	0.375	0.136	1
APOC4-APOC2	0.00602687	0.543034	0.375	0.136	1
PPP1R12A	0.00608339	0.47333	0.5	0.205	1
ATP6V0E1	0.00610353	0.28968	0.5	0.187	1
ADPGK	0.00612548	0.303459	0.312	0.096	1
SELPLG	0.00625002	0.390509	0.375	0.128	1
SLC4A7	0.00630687	0.431754	0.375	0.133	1
COLGALT1	0.0063884	0.262881	0.312	0.096	1
ETNK1	0.00650481	0.562062	0.438	0.178	1
SNU13	0.00658919	0.330725	0.375	0.132	1
LAPTM4A	0.00680333	0.265944	0.438	0.154	1
NPL	0.00685435	0.277374	0.375	0.128	1
LST1	0.00686216	0.421549	0.312	0.101	1
TNRC18	0.00688685	0.314137	0.312	0.1	1
AAK1	0.00692474	0.328133	0.562	0.23	1
RPL4	0.00698972	0.313249	0.812	0.403	1
CST3	0.00711304	0.3742	0.5	0.199	1
TACC1	0.00746591	0.602484	0.625	0.347	1
RPL27	0.00768186	0.576721	0.688	0.36	1
MAML2	0.00775626	0.539738	0.625	0.312	1
RPL26	0.00786087	0.420583	0.688	0.329	1
ARMH1	0.00793791	0.25749	0.312	0.1	1
RPL10A	0.00799333	0.403421	0.625	0.323	1
ATP6V1B2	0.00831511	0.322071	0.5	0.206	1
RPS4X	0.00837043	0.485829	0.688	0.378	1
VOPP1	0.00851617	0.3427	0.312	0.103	1
CPEB4	0.00868348	0.51469	0.375	0.147	1
ATM	0.0087141	0.348949	0.562	0.244	1
HIST1H4C	0.00873014	0.380107	0.375	0.138	1
MYH9	0.00887037	0.29917	0.5	0.194	1
SESN1	0.00902791	0.474113	0.438	0.187	1
PRKCH	0.00910365	0.361574	0.312	0.105	1
RPL23A	0.00920916	0.495988	0.562	0.288	1
AGAP3	0.00937675	0.726169	0.438	0.197	1
HNRNPA1	0.00938199	0.500604	0.562	0.261	1
RPL17-C18orf32	0.00942835	0.415534	0.688	0.353	1
P4HB	0.00946493	0.352859	0.375	0.138	1
SQSTM1	0.00959253	0.459947	0.562	0.298	1
C1orf56	0.00966396	0.308112	0.375	0.136	1
BLOC1S5-TXNDC5	0.00989138	0.277232	0.312	0.101	1
OFD1	0.0098939	0.252164	0.438	0.162	1
TUG1	0.0100282	0.286051	0.312	0.104	1
NFATC3	0.0100326	0.439594	0.375	0.145	1
RPS6KA3	0.01019	0.416661	0.312	0.11	1
HEATR5B	0.0102718	0.25354	0.375	0.135	1
AP1B1	0.0102936	0.273165	0.375	0.136	1
RPL5	0.0104645	0.562024	0.75	0.472	1
FNIP2	0.0104879	0.413823	0.562	0.251	1
SLC25A36	0.0105069	0.305665	0.375	0.139	1
LCOR	0.0105633	0.342755	0.5	0.223	1
HSP90B1	0.0106092	0.643559	0.562	0.294	1
SEC24B	0.0106954	0.321335	0.562	0.25	1
RPN2	0.0107317	0.445752	0.375	0.146	1
KPNA6	0.0108324	0.335247	0.438	0.176	1
FCHSD2	0.010845	0.261264	0.5	0.204	1
AC093516.1	0.0108536	0.320917	0.375	0.138	1
SLC25A37	0.0108565	0.305905	0.5	0.213	1
NFE2L2	0.0113403	0.314263	0.438	0.19	1
AL359762.3	0.0116459	0.316369	0.375	0.142	1
KDM2A	0.0117196	0.323059	0.375	0.145	1
STAB1	0.0119732	0.376207	0.312	0.105	1
RAB7A	0.0125766	0.342586	0.625	0.299	1
HSPE1	0.0127969	0.45992	0.562	0.27	1
AC004922.1	0.0129138	0.29966	0.375	0.138	1
TRIO	0.0130046	0.321164	0.438	0.176	1
EIF4B	0.0130076	0.287249	0.5	0.212	1
AP002990.1	0.0130348	0.529743	0.5	0.237	1
EEF1G	0.0130348	0.529743	0.5	0.237	1
RF01871	0.0131493	0.479339	0.625	0.315	1
MGAT4A	0.0132194	0.369719	0.375	0.142	1
BLNK	0.0134379	0.307832	0.375	0.142	1
BRI3	0.0135546	0.282884	0.438	0.174	1
SIK3	0.0135822	0.406236	0.812	0.455	1
ITGAV	0.0139478	0.290385	0.438	0.18	1
TBC1D14	0.014246	0.328737	0.375	0.146	1
SIK2	0.0143514	0.432095	0.438	0.198	1
MT-CO1	0.0145526	0.328268	1	0.895	1
FXR1	0.0150967	0.294257	0.438	0.183	1
SETX	0.0161649	0.337826	0.438	0.19	1
CTSD	0.0162609	0.254564	0.625	0.302	1
MARK3	0.0165178	0.263491	0.5	0.199	1
OGA	0.0170505	0.305057	0.562	0.264	1
SMURF2	0.0175127	0.295068	0.375	0.146	1
PDS5A	0.0176018	0.289351	0.438	0.19	1
SRSF10	0.0176253	0.255362	0.375	0.136	1
BRD4	0.0179189	0.373092	0.438	0.194	1
RPS23	0.0181846	0.333282	0.688	0.361	1
EXT1	0.0186346	0.458116	0.312	0.121	1
ATP9B	0.0188681	0.329389	0.312	0.117	1
EPB41L2	0.0198713	0.509659	0.812	0.503	1
TMED9	0.0200878	0.285109	0.312	0.114	1
HSPA1B	0.0202576	0.600972	0.75	0.584	1
NSMCE2	0.0205422	0.338656	0.5	0.226	1
SRSF5	0.0215607	0.301544	0.688	0.353	1
RPS25	0.0221487	0.253995	0.562	0.271	1
SARNP	0.0227416	0.364055	0.312	0.115	1
ACTR3	0.0229363	0.408119	0.375	0.154	1
ACAP2	0.0235817	0.259167	0.438	0.194	1
SNX29	0.0236639	0.462941	0.562	0.299	1
RPS6KA2	0.0242762	0.294039	0.5	0.229	1
GDI2	0.0243317	0.336542	0.438	0.201	1
RPL30	0.0243342	0.301677	0.812	0.485	1
NEK7	0.0245252	0.287567	0.312	0.128	1
BMP2K	0.0255582	0.374494	0.438	0.197	1
MAP2K4	0.0255683	0.327908	0.312	0.119	1
RPS13	0.025844	0.567594	0.75	0.435	1
PPP6C	0.0259323	0.42214	0.312	0.121	1
PFDN5	0.0259617	0.471654	0.438	0.216	1
SDHB	0.0265127	0.273548	0.312	0.117	1
RPL18	0.0278822	0.377594	0.688	0.399	1
DSCR9	0.0281227	0.290789	0.5	0.251	1
SLC23A2	0.0283066	0.342896	0.312	0.125	1
RPL27A	0.028728	0.369996	0.688	0.41	1
AC135178.2	0.0291371	0.267405	0.438	0.198	1
RPS5	0.0293067	0.350224	0.625	0.358	1
LITAF	0.0297425	0.66821	0.5	0.281	1
C12orf57	0.0302505	0.274844	0.312	0.115	1
AGO4	0.0304576	0.417986	0.312	0.131	1
RPL37A	0.0311093	0.486147	0.688	0.492	1
FCER1G	0.031203	0.497719	0.375	0.169	1
FBXO11	0.0336618	0.296728	0.5	0.218	1
NDUFB5	0.0339371	0.312767	0.625	0.33	1
MAT2A	0.0340252	0.332782	0.5	0.26	1
SPRED1	0.0349097	0.311713	0.312	0.136	1
KLF7	0.0350961	0.328896	0.312	0.133	1
SLA	0.0353137	0.29338	0.312	0.124	1
HSPA1A	0.0388533	0.700815	0.938	0.787	1
SNAP23	0.0390565	0.507814	0.312	0.136	1
UQCRC2	0.0394685	0.263507	0.375	0.153	1
ZMYND11	0.0395915	0.25092	0.375	0.164	1
IFI16	0.0403857	0.405153	0.375	0.18	1
KIAA0232	0.0404306	0.256069	0.375	0.166	1
HDAC9	0.0404449	0.261292	0.5	0.256	1
ARPC4	0.0425593	0.256583	0.312	0.128	1
MTRNR2L1	0.0426323	0.335692	0.5	0.253	1
EI24	0.043051	0.308522	0.375	0.16	1
ATF7IP	0.0430821	0.296204	0.375	0.171	1
ARF1	0.0445649	0.367335	0.5	0.271	1
GLDN	0.046238	0.251485	0.625	0.334	1
EPB41L3	0.0464144	0.305036	0.562	0.313	1
ELOVL5	0.0467577	0.26681	0.375	0.171	1
RPL35A	0.0469441	0.410985	0.625	0.371	1
CAST	0.048055	0.466495	0.438	0.216	1
AP4B1-AS1	0.0482144	0.347969	0.625	0.361	1
FOXP1	0.0485989	0.347206	0.562	0.354	1
RPL14P1	0.0494279	0.28652	0.625	0.344	1
PREX1	0.0500829	0.298528	0.625	0.41	1
RAC1	0.0543286	0.402007	0.75	0.455	1
RPS27A	0.054352	0.515305	0.688	0.485	1
LHFPL2	0.0559266	0.31399	0.438	0.219	1
TENT2	0.0587978	0.377778	0.312	0.145	1
PSAP	0.0588049	0.457451	0.812	0.635	1
PSMA1	0.0593722	0.31007	0.312	0.138	1
ATP6V0A1	0.0617361	0.276953	0.438	0.223	1
LMNA	0.0619166	0.346728	0.312	0.143	1
SFT2D2	0.0628091	0.256225	0.312	0.145	1
MAP3K3	0.063131	0.367369	0.312	0.14	1
CYBA	0.0646929	0.282167	0.312	0.143	1
PTPRJ	0.0647355	0.346786	0.438	0.249	1
ARPC3	0.0684475	0.373047	0.375	0.201	1
ALOX5AP	0.0717196	0.82711	0.312	0.162	1
RPL15	0.0747298	0.427286	0.688	0.517	1
RPL8	0.0755934	0.309724	0.5	0.302	1
WSB1	0.0759102	0.351148	0.938	0.581	1
FUS	0.0768731	0.266899	0.5	0.292	1
MGAT5	0.0821808	0.265315	0.438	0.237	1
EEF1D	0.0871515	0.25179	0.375	0.195	1
DDX39B	0.0891417	0.296664	0.375	0.202	1
SPIDR	0.0943316	0.305692	0.312	0.154	1
ASAH1	0.0970408	0.258883	0.438	0.244	1
FOXO1	0.100379	0.417339	0.375	0.206	1
RPL28	0.103407	0.361122	0.625	0.396	1
FKBP4	0.104503	0.444612	0.312	0.173	1
NCOR1	0.106574	0.296942	0.562	0.298	1
HNRNPD	0.107013	0.306497	0.562	0.353	1
CCNI	0.114426	0.300094	0.625	0.445	1
ACTB	0.114947	0.360084	0.875	0.656	1
AC097634.4	0.116072	0.32921	0.438	0.281	1
IDI1	0.116368	0.314218	0.312	0.162	1
TBC1D5	0.121476	0.404607	0.562	0.364	1
METTL7A	0.12165	0.507031	0.625	0.416	1
GRID2	0.123239	0.411822	0.312	0.169	1
ATP6V1G2-DDX39B	0.129921	0.259449	0.375	0.213	1
MTSS1	0.135264	0.622024	0.438	0.27	1
TAOK3	0.136493	0.28773	0.5	0.263	1
RASA3	0.137405	0.277275	0.312	0.174	1
HSPE1-MOB4	0.137883	0.389854	0.312	0.174	1
TIMP2	0.139767	0.335246	0.5	0.347	1
MECP2	0.145226	0.465948	0.312	0.194	1
TLN1	0.156674	0.340139	0.375	0.232	1
FAU	0.158848	0.333071	0.625	0.459	1
PUM2	0.162192	0.30129	0.438	0.282	1
EIF4A2	0.171865	0.345628	0.5	0.309	1
SKI	0.190096	0.274435	0.312	0.18	1
GSN	0.19456	0.299553	0.75	0.449	1
TOMM7	0.230867	0.276552	0.375	0.215	1
SSBP2	0.244187	0.307464	0.312	0.211	1
NPC1	0.259246	0.547468	0.375	0.27	1
AC118754.1	0.273049	0.283267	0.375	0.256	1
SIRPA	0.299575	0.37768	0.312	0.205	1
RNASEK-C17orf49	0.349401	0.277172	0.375	0.279	1
CAP1	0.384848	0.379351	0.375	0.277	1
FMNL2	0.619777	0.283763	0.375	0.562	1
