# Supplementary material for: Single-cell profiling of human subventricular zone progenitors identifies SFRP1 as a target to re-activate progenitors
Source: Nat Commun. 2022 Feb 24;13:1036. doi: 10.1038/s41467-022-28626-9 (PMC8873234; doi:10.1038/s41467-022-28626-9)
Supplement: Supplementary file 5 — Supplementary Data 3 [file 41467_2022_28626_MOESM5_ESM.xlsx]

## Sheet: Number of cells per cluster
Number of cells per cell type per time-point										Integration of current dataset to Zhong S et al., 2018 (fetal) and Jäkel S et al., 2019 (mid-aged)
Cell type	GW12	GW16	GW19	GW23	GW26	mid-Aged	Aged
Oligodendrocytes3	0	0	0	0	0	927	74
Oligodendrocytes2	0	0	0	0	0	629	49
Oligodendrocytes1	0	0	0	0	0	348	131
Late OPC3	0	0	0	0	0	300	47
Late OPC2	0	0	0	0	0	166	84
Late OPC1	0	0	0	0	0	213	7
Early OPC2	0	2	0	0	2	211	3
Early OPC1	2	7	2	18	42	0	0

## Sheet: Oligo1
row.names	p_val	avg_logFC	pct.1	pct.2	p_val_adj
LRP1B	2.32834e-113	-1.34653	0.093	0.534	4.65669e-110
RBFOX1	4.08932e-112	-1.73527	0.08	0.497	8.17865e-109
TUBB2B	7.01515e-73	-0.981041	0.094	0.407	1.40303e-69
DTNA	7.73275e-68	-0.641984	0.164	0.5	1.54655e-64
SCRG1	8.53583e-66	-0.651898	0.125	0.459	1.70717e-62
S100B	5.11635e-64	-0.638336	0.562	0.867	1.02327e-60
NEGR1	2.96918e-61	-0.500139	0.213	0.559	5.93837e-58
MYLK	1.48035e-60	-0.518723	0.187	0.52	2.96069e-57
ADGRL3	5.42018e-60	-0.788844	0.111	0.419	1.08404e-56
CHRM5	2.45583e-58	-0.583332	0.104	0.374	4.91166e-55
PDE4D	1.32899e-57	-0.545243	0.196	0.519	2.65797e-54
MAPK10	2.12102e-55	-0.471764	0.156	0.464	4.24205e-52
TUBA1B	3.05584e-55	-0.52512	0.206	0.56	6.11168e-52
USH1C	3.80946e-53	-0.541907	0.073	0.308	7.61892e-50
MACROD2	5.38643e-53	-0.453613	0.159	0.453	1.07729e-49
LGALS1	8.16073e-50	-0.77678	0.115	0.392	1.63215e-46
ACSBG1	1.0339e-49	-0.623456	0.082	0.314	2.06781e-46
AFF3	2.29527e-48	-0.519633	0.1	0.337	4.59054e-45
NRXN1	2.96983e-47	-1.26062	0.041	0.293	5.93966e-44
MIR99AHG	9.50242e-46	-0.30935	0.296	0.65	1.90048e-42
LRRTM4	3.59785e-44	-1.07924	0.091	0.319	7.1957e-41
MDGA2	5.2935e-44	-0.6653	0.065	0.279	1.0587e-40
NRCAM	6.63154e-44	-0.865199	0.057	0.265	1.32631e-40
SPARCL1	1.23991e-42	-0.595343	0.101	0.323	2.47982e-39
GPM6A	1.21224e-41	-0.757314	0.077	0.287	2.42448e-38
FGF14	3.20096e-41	-1.03383	0.082	0.285	6.40192e-38
SPOCK1	4.3019e-41	0.490059	0.834	0.841	8.60381e-38
MAP1B	2.01754e-40	-0.417481	0.339	0.703	4.03508e-37
FSTL5	2.38056e-40	-0.656113	0.069	0.274	4.76112e-37
ESRRG	7.36045e-40	-0.267556	0.064	0.259	1.47209e-36
FGF12	1.56387e-39	-0.825528	0.055	0.253	3.12773e-36
CSMD1	1.68207e-38	-1.21101	0.054	0.272	3.36414e-35
GRM7	2.20441e-38	-0.577967	0.086	0.284	4.40882e-35
AVEN	3.71153e-36	-0.297361	0.09	0.277	7.42306e-33
SEMA5A	7.13052e-36	-0.612089	0.085	0.324	1.4261e-32
NRG3	9.49245e-35	-0.637605	0.081	0.261	1.89849e-31
ENPP6	1.88097e-34	-0.377207	0.078	0.302	3.76194e-31
DKK3	3.80574e-34	-0.293229	0.082	0.258	7.61148e-31
OPCML	4.18419e-34	-1.11049	0.087	0.282	8.36837e-31
PTN	5.49078e-34	-0.339068	0.196	0.446	1.09816e-30
CLU	6.21671e-34	-0.333183	0.317	0.621	1.24334e-30
PARD3B	1.2278e-33	-0.28889	0.129	0.345	2.45561e-30
MAP2	5.44072e-32	-0.474003	0.087	0.27	1.08814e-28
SCG5	7.58883e-32	-0.379849	0.126	0.359	1.51777e-28
DSCAM	8.03449e-32	-1.49398	0.071	0.254	1.6069e-28
DAB1	1.06854e-31	-0.277982	0.073	0.262	2.13708e-28
SMOC1	2.16852e-31	-0.345478	0.127	0.335	4.33704e-28
MT1E	1.31152e-30	-0.28969	0.102	0.281	2.62304e-27
NAV2	1.49391e-30	-0.388304	0.166	0.422	2.98782e-27
RGS7	1.46683e-29	-0.262525	0.131	0.328	2.93367e-26
LRRC4C	1.57576e-29	-0.716677	0.169	0.381	3.15151e-26
SNAP25	2.27593e-29	-0.410482	0.094	0.284	4.55185e-26
CHN1	4.2652e-28	-0.30801	0.101	0.286	8.53039e-25
MT3	3.46007e-27	-0.278987	0.424	0.73	6.92014e-24
SPARC	4.59133e-26	-0.331615	0.135	0.352	9.18266e-23
PHACTR1	5.43977e-26	-0.423389	0.123	0.337	1.08795e-22
CNTN1	3.71042e-25	-0.360623	0.105	0.281	7.42083e-22
APOE	7.4552e-25	-0.281243	0.13	0.308	1.49104e-21
PCSK1N	8.2525e-25	-0.27986	0.111	0.297	1.6505e-21
PIP4K2A	1.61556e-24	0.280716	0.954	0.954	3.23112e-21
MAG	2.75459e-24	-0.282345	0.511	0.793	5.50918e-21
SYT1	1.58906e-22	-0.479663	0.093	0.253	3.17811e-19
KLK6	1.75028e-22	-0.310231	0.207	0.457	3.50055e-19
HSPA1A	2.87604e-22	0.37237	0.795	0.763	5.75207e-19
UCHL1	4.04727e-22	-0.457855	0.087	0.304	8.09453e-19
RAMP1	4.9544e-22	-0.273194	0.092	0.251	9.9088e-19
CST3	5.16724e-22	-0.361722	0.117	0.281	1.03345e-18
GRIA4	6.23505e-21	-0.282205	0.178	0.393	1.24701e-17
RORA	1.20281e-20	-0.44605	0.161	0.369	2.40562e-17
MIR219A2	2.26136e-20	-0.256536	0.422	0.675	4.52272e-17
RANBP17	4.55133e-20	-0.292389	0.1	0.26	9.10266e-17
DPP6	1.47631e-16	-0.628264	0.12	0.322	2.95263e-13
PDZD2	3.82041e-16	-0.260969	0.143	0.297	7.64081e-13
SGK1	3.56917e-15	0.392346	0.681	0.723	7.13834e-12
PMP2	6.06534e-15	-0.271564	0.109	0.27	1.21307e-11
CALM3	1.7878e-10	-0.251627	0.127	0.292	3.57561e-07
FRYL	2.0187e-09	0.270144	0.752	0.853	4.03741e-06
ADAMTS18	0.000401888	0.350121	0.186	0.268	0.803777
P4HA1	0.00214366	0.338693	0.187	0.285	1
EXOC6B	0.0190105	0.324178	0.559	0.692	1
KLHL32	0.193805	0.308989	0.542	0.679	1
CDK19	0.228313	0.301367	0.514	0.652	1
ROBO1	0.664911	0.376608	0.385	0.49	1
PON2	0.811166	0.25044	0.254	0.327	1

## Sheet: Oligo2
row.names	p_val	avg_logFC	pct.1	pct.2	p_val_adj
MAN2A1	3.37771e-52	0.456761	0.959	0.852	6.75542e-49
CD9	3.42451e-42	-0.730729	0.307	0.612	6.84903e-39
RBFOX1	1.63379e-41	0.925292	0.54	0.324	3.26759e-38
S100B	5.74819e-34	0.443271	0.87	0.748	1.14964e-30
NEAT1	9.80164e-31	0.418947	0.92	0.846	1.96033e-27
PTN	2.58201e-29	-0.606182	0.177	0.42	5.16403e-26
CNTN1	3.18909e-25	-0.721384	0.078	0.266	6.37818e-22
GPM6A	9.33998e-25	-0.716742	0.081	0.259	1.868e-21
PPFIA2	7.27997e-23	-0.552799	0.171	0.404	1.45599e-19
CHRM5	6.76763e-22	-0.375923	0.139	0.331	1.35353e-18
SPARCL1	9.95724e-22	-0.526138	0.117	0.292	1.99145e-18
OPCML	3.17228e-21	-1.03722	0.087	0.258	6.34456e-18
APOD	3.64657e-21	-0.302742	0.863	0.904	7.29315e-18
CLU	8.94322e-20	-0.478965	0.36	0.572	1.78864e-16
FGF14	9.80793e-20	-0.837724	0.097	0.256	1.96159e-16
OLIG1	2.22078e-19	-0.493799	0.276	0.505	4.44156e-16
RNASE1	3.1057e-18	-0.427008	0.459	0.64	6.2114e-15
PPP3CA	7.43457e-18	-0.579001	0.139	0.337	1.48691e-14
MT1E	1.32397e-17	-0.315077	0.106	0.257	2.64795e-14
MAP1B	2.22979e-16	0.343062	0.681	0.568	4.45958e-13
CST3	2.5213e-16	-0.577256	0.106	0.263	5.0426e-13
RGCC	3.3689e-16	-0.375308	0.447	0.632	6.7378e-13
TF	4.59109e-16	0.257336	0.894	0.803	9.18218e-13
APOE	6.46529e-16	-0.368079	0.134	0.284	1.29306e-12
PDZD2	1.77451e-15	-0.556779	0.124	0.283	3.54903e-12
TMSB10	7.12336e-15	-0.298429	0.156	0.328	1.42467e-11
SGK1	8.61643e-14	-0.31908	0.587	0.743	1.72329e-10
LRRC4C	1.64499e-13	-0.79002	0.198	0.347	3.28999e-10
GRID2	3.81317e-13	-0.320419	0.36	0.534	7.62634e-10
DBI	3.8303e-13	-0.294712	0.255	0.429	7.66059e-10
ERBB4	5.27568e-13	-0.359867	0.624	0.754	1.05514e-09
SNAP25	5.44893e-13	-0.478156	0.108	0.256	1.08979e-09
LSAMP	5.77692e-13	-0.386047	0.499	0.648	1.15538e-09
B2M	2.3064e-12	-0.450831	0.155	0.331	4.61279e-09
LRRTM4	1.74514e-11	-0.56613	0.146	0.276	3.49029e-08
OLIG2	6.36741e-11	-0.476577	0.083	0.251	1.27348e-07
DTNA	3.88991e-10	0.547033	0.45	0.383	7.77981e-07
ROBO1	5.67456e-10	-0.287519	0.333	0.49	1.13491e-06
MT2A	2.96812e-09	-0.277793	0.367	0.524	5.93624e-06
RAB30	2.31322e-08	0.427941	0.471	0.419	4.62644e-05
LGALS1	1.02579e-07	0.550137	0.355	0.295	0.000205158
NAV2	1.86981e-07	0.341898	0.388	0.331	0.000373962
NDUFA4	4.97707e-07	-0.261207	0.27	0.411	0.000995413
PDE4D	6.96768e-07	0.445097	0.456	0.41	0.00139354
MYLK	1.74029e-06	0.399558	0.453	0.408	0.00348058
KAZN	2.21102e-06	-0.446667	0.245	0.379	0.00442204
PON2	0.000101349	-0.289028	0.206	0.331	0.202698
MACROD2	0.000132628	0.420568	0.391	0.355	0.265255
MIR99AHG	0.000144489	0.253147	0.555	0.538	0.288978
ZNF708	0.000258565	0.321248	0.479	0.46	0.51713
IQCJ.SCHIP1	0.000272706	0.402379	0.372	0.347	0.545412
PHACTR1	0.000641418	0.500703	0.288	0.267	1
DPP6	0.000848181	-0.294829	0.178	0.281	1
NEGR1	0.0037103	0.291512	0.457	0.452	1
MAGI1	0.00749957	0.254512	0.472	0.474	1
CNTNAP2	0.0119798	0.350336	0.441	0.446	1
TRPS1	0.0149008	0.319288	0.382	0.384	1
ANKRD26	0.015059	0.370065	0.298	0.29	1
ACSBG1	0.0194979	0.5567	0.251	0.241	1
MAPK10	0.0512129	0.269167	0.366	0.37	1
LRP1B	0.0700443	-0.301962	0.353	0.411	1
AFF3	0.116519	0.496325	0.263	0.265	1
TUBB2B	0.152568	0.364538	0.304	0.312	1
SFMBT2	0.173371	0.40793	0.288	0.296	1
TMEM151A	0.311116	0.271035	0.338	0.357	1
SGCD	0.565333	0.274813	0.319	0.343	1
PWRN1	0.672303	0.304307	0.248	0.282	1
CSPP1	0.766378	0.281064	0.289	0.314	1

## Sheet: Oligo3
row.names	p_val	avg_logFC	pct.1	pct.2	p_val_adj
RBFOX1	2.19545e-116	1.71722	0.945	0.328	4.39089e-113
TUBB2B	1.63333e-94	1.54653	0.814	0.274	3.26665e-91
LGALS1	3.89642e-86	1.51032	0.795	0.272	7.79284e-83
S100B	5.66418e-72	1.03713	0.991	0.758	1.13284e-68
MYLK	6.84462e-43	0.873877	0.786	0.391	1.36892e-39
TUBA1B	7.5246e-37	0.816973	0.805	0.426	1.50492e-33
USH1C	4.84668e-34	0.952076	0.514	0.216	9.69335e-31
FSTL5	8.30406e-34	1.16026	0.482	0.192	1.66081e-30
SGK1	1.09381e-32	-1.11835	0.445	0.73	2.18762e-29
SPARC	9.73215e-31	0.809494	0.582	0.264	1.94643e-27
SCRG1	1.58748e-28	0.713951	0.659	0.334	3.17497e-25
MACROD2	2.58182e-27	0.794295	0.636	0.343	5.16363e-24
TF	1.0073e-26	0.476566	0.991	0.809	2.01459e-23
UCHL1	2.13825e-26	0.679549	0.514	0.218	4.27649e-23
AFF3	1.08365e-25	0.81008	0.509	0.247	2.1673e-22
SPOCK1	1.10741e-25	-0.777693	0.741	0.846	2.21483e-22
MAN2A1	4.76655e-25	0.436057	0.991	0.865	9.5331e-22
MAP1B	1.73321e-23	0.501632	0.882	0.57	3.46643e-20
ACSBG1	1.12247e-21	0.887313	0.455	0.228	2.24493e-18
SEMA5A	1.23555e-21	0.55907	0.495	0.233	2.4711e-18
MAPK10	1.48903e-21	0.634905	0.623	0.351	2.97807e-18
ENPP6	1.89626e-21	0.583477	0.473	0.216	3.79253e-18
ROBO1	3.02097e-21	-1.12087	0.155	0.479	6.04194e-18
LRP1B	5.11239e-21	0.420484	0.673	0.379	1.02248e-17
PDE4D	1.83564e-20	0.669404	0.659	0.402	3.67129e-17
DTNA	2.60605e-19	0.592623	0.641	0.379	5.21211e-16
SPP1	5.62995e-19	0.385546	0.986	0.837	1.12599e-15
ERBB4	8.45808e-19	-0.869271	0.586	0.737	1.69162e-15
CDKN1C	3.19732e-18	0.468969	0.591	0.322	6.39463e-15
PMP2	4.47958e-18	0.617427	0.418	0.207	8.95915e-15
PTN	9.8633e-18	-0.949961	0.105	0.388	1.97266e-14
KLK6	1.28025e-17	0.527908	0.627	0.362	2.56049e-14
NAV2	3.10745e-16	0.412722	0.595	0.325	6.21489e-13
PHACTR1	6.0745e-16	0.55852	0.468	0.257	1.2149e-12
NEGR1	7.47759e-16	0.497601	0.691	0.436	1.49552e-12
RELL1	1.39551e-15	0.691839	0.345	0.172	2.79102e-12
CRYAB	5.08799e-15	0.330159	0.995	0.95	1.0176e-11
FTL	7.1254e-15	0.320646	0.973	0.893	1.42508e-11
BHLHE41	7.07118e-14	0.40794	0.382	0.19	1.41424e-10
RP11.16D22.2	8.08705e-14	0.842802	0.291	0.139	1.61741e-10
PPP3CA	3.82899e-13	-0.943847	0.059	0.313	7.65799e-10
SIRT2	4.70478e-12	0.370384	0.677	0.442	9.40957e-09
RAB30	5.63462e-12	0.466956	0.618	0.416	1.12692e-08
TTTY14	6.47312e-12	0.592717	0.414	0.246	1.29462e-08
HSPA8	1.06394e-11	0.282833	0.382	0.206	2.12789e-08
MAPK8IP1	1.51282e-11	0.291139	0.486	0.279	3.02564e-08
MSI2	2.66259e-11	0.398234	0.5	0.306	5.32518e-08
ADGRL3	1.25779e-10	0.300961	0.5	0.312	2.51558e-07
TRPS1	1.72295e-10	0.37581	0.564	0.37	3.44589e-07
PDZD2	8.1753e-10	-0.663636	0.068	0.263	1.63506e-06
PCLO	1.12644e-09	0.768836	0.291	0.168	2.25287e-06
PPP1R14A	1.20438e-09	0.273629	0.886	0.638	2.40876e-06
CD9	3.82842e-09	-0.682808	0.432	0.557	7.65683e-06
SETBP1	5.38429e-09	0.461565	0.268	0.154	1.07686e-05
RGCC	1.43228e-08	-0.614762	0.514	0.6	2.86456e-05
MAGI1	4.55806e-08	0.31228	0.645	0.461	9.11612e-05
TMEM151A	7.17535e-08	0.352437	0.495	0.343	0.000143507
CNTNAP2	7.95896e-08	0.534105	0.555	0.437	0.000159179
RANBP17	9.9155e-08	0.583721	0.314	0.203	0.00019831
APOE	1.05806e-07	-0.516489	0.1	0.264	0.000211613
IQCJ.SCHIP1	1.1759e-07	0.398192	0.477	0.343	0.000235179
NEAT1	1.20099e-07	0.256718	0.968	0.853	0.000240198
SFMBT2	2.24128e-07	0.390462	0.418	0.285	0.000448256
PRKCB	4.79729e-07	0.431025	0.309	0.199	0.000959457
EXOC6B	1.00967e-06	-0.570268	0.618	0.653	0.00201933
LSAMP	1.33825e-06	-0.600593	0.541	0.623	0.00267651
SPARCL1	1.56028e-06	-0.398239	0.114	0.265	0.00312056
ALDOA	1.64341e-06	0.251726	0.564	0.408	0.00328682
UQCR11	1.86066e-06	0.278989	0.414	0.284	0.00372131
PARD3B	2.08589e-06	0.36019	0.386	0.271	0.00417179
TUBB4B	2.58887e-06	0.278813	0.259	0.175	0.00517773
KLHL32	2.96956e-06	-0.494536	0.577	0.641	0.00593912
SCG5	4.4236e-06	0.279687	0.395	0.28	0.0088472
MDGA2	4.54516e-06	0.549866	0.3	0.207	0.00909031
TUBB2A	1.21855e-05	0.474562	0.259	0.175	0.0243709
PWRN1	1.8365e-05	0.266228	0.373	0.268	0.03673
CSPP1	2.44642e-05	0.326445	0.409	0.301	0.0489284
PPFIA2	4.65856e-05	-0.549708	0.214	0.366	0.0931712
DMD	4.87549e-05	-0.511635	0.441	0.533	0.0975098
RNASE1	5.08705e-05	-0.493712	0.591	0.603	0.101741
MIR181A1HG	5.27034e-05	-0.492697	0.341	0.463	0.105407
ADAMTS18	0.000127753	-0.301959	0.127	0.251	0.255506
RYR2	0.000363461	-0.409427	0.159	0.29	0.726922
SMOC1	0.000392254	-0.35071	0.155	0.28	0.784509
SYTL2	0.000542951	0.255877	0.282	0.213	1
PON2	0.00150897	-0.595209	0.191	0.313	1
TMSB10	0.00159911	-0.502406	0.173	0.301	1
GRID2	0.00177669	-0.452127	0.405	0.504	1
LRRC4C	0.00262121	-0.819997	0.223	0.323	1
CDK19	0.0063125	-0.327384	0.6	0.611	1
LRRTM4	0.041118	-0.419585	0.182	0.254	1
RGS7	0.0510581	0.254462	0.3	0.265	1
OLIG1	0.0514361	-0.383997	0.441	0.459	1
GRIA4	0.159849	-0.355024	0.273	0.331	1
DBI	0.163079	-0.289886	0.364	0.395	1
KAZN	0.526443	-0.304033	0.382	0.349	1
CA2	0.529124	-0.257909	0.409	0.406	1
ADARB2	0.547228	-0.277117	0.382	0.398	1
B2M	0.714708	-0.282874	0.264	0.297	1
ITGB8	0.739274	-0.28954	0.345	0.353	1

## Sheet: Late OPC3
row.names	p_val	avg_logFC	pct.1	pct.2	p_val_adj
ACSBG1	7.65202e-47	0.417771	0.596	0.214	1.5304e-43
CRYAB	9.9838e-37	0.435005	1	0.95	1.99676e-33
USH1C	1.70929e-36	0.372534	0.544	0.211	3.41859e-33
SCRG1	8.62192e-36	0.419779	0.768	0.322	1.72438e-32
UQCR11	1.4805e-28	0.282541	0.62	0.265	2.96101e-25
APOD	7.00247e-28	0.391206	0.996	0.887	1.40049e-24
TPPP3	2.60605e-27	0.443579	0.78	0.375	5.21209e-24
TUBA1B	3.33031e-27	0.410262	0.844	0.419	6.66062e-24
S100B	1.73722e-26	0.408736	0.996	0.755	3.47444e-23
MYLK	5.91821e-26	0.361453	0.776	0.388	1.18364e-22
KLK6	1.20425e-25	0.464101	0.764	0.348	2.4085e-22
CA2	4.99505e-25	0.442894	0.76	0.377	9.9901e-22
ENPP6	1.77807e-24	0.4335	0.548	0.207	3.55615e-21
TUBB4B	1.92002e-24	0.278134	0.488	0.156	3.84003e-21
SIRT2	3.9336e-22	0.404159	0.816	0.428	7.86719e-19
SPP1	1.79992e-21	0.381572	0.996	0.835	3.59983e-18
MEG3	4.68838e-21	-0.27475	0.316	0.088	9.37677e-18
NEGR1	5.78241e-21	0.257387	0.804	0.424	1.15648e-17
HSP90AA1	1.26608e-19	0.314686	1	0.876	2.53216e-16
MT3	1.75365e-19	0.359432	0.908	0.614	3.5073e-16
CDH4	9.0636e-18	-0.270281	0.356	0.14	1.81272e-14
SCG5	1.662e-16	0.273568	0.556	0.265	3.32399e-13
RNASE1	1.25879e-14	0.28531	0.924	0.576	2.51758e-11
MAG	8.77483e-14	0.270407	0.948	0.687	1.75497e-10
RGCC	1.73849e-13	0.267445	0.884	0.57	3.47699e-10
MMP16	3.77997e-13	-0.648979	0.336	0.142	7.55994e-10
GPC5	7.74066e-13	-0.251068	0.352	0.155	1.54813e-09
DGKG	9.51304e-13	-0.363	0.276	0.104	1.90261e-09
BASP1	3.07351e-12	-0.250614	0.332	0.143	6.14702e-09
CCK	4.91104e-11	-0.251555	0.312	0.142	9.82208e-08
KLF12	9.39318e-11	-0.304578	0.336	0.161	1.87864e-07
S100A6	2.36394e-10	-0.261632	0.376	0.192	4.72788e-07
VSNL1	2.77464e-10	-0.251752	0.332	0.164	5.54928e-07
TNR	3.00322e-10	-0.988992	0.348	0.165	6.00644e-07
CST3	3.11415e-10	-0.427547	0.42	0.215	6.22829e-07
BRINP3	3.18599e-10	-0.422902	0.284	0.116	6.37198e-07
VCAN	4.78039e-10	-0.724427	0.352	0.171	9.56078e-07
MT1E	1.09837e-09	-0.2893	0.392	0.212	2.19675e-06
SCN1A	2.125e-09	-0.271514	0.32	0.149	4.25e-06
CTNNA2	2.31039e-09	-0.5217	0.356	0.178	4.62079e-06
STMN2	2.82879e-09	-0.253353	0.316	0.151	5.65757e-06
GRM7	7.628e-09	-0.315888	0.388	0.21	1.5256e-05
TTTY14	1.30263e-07	-0.28665	0.436	0.243	0.000260526
ATP2B1	1.352e-07	-0.282717	0.396	0.202	0.0002704
SLC8A1	1.78388e-07	-0.329493	0.336	0.171	0.000356776
GRM5	4.1688e-07	-0.328224	0.32	0.156	0.000833759
PTPRM	4.49036e-07	-0.282903	0.38	0.195	0.000898072
SYT1	4.78412e-07	-0.566923	0.348	0.192	0.000956824
RP11.384F7.2	7.47891e-07	-0.484447	0.344	0.182	0.00149578
SLC1A2	8.21295e-07	-0.447379	0.316	0.15	0.00164259
DSCAM	1.12039e-06	-1.20213	0.34	0.186	0.00224079
GRIK1	1.13669e-06	-0.307052	0.288	0.148	0.00227339
NRGN	1.20515e-06	-0.362631	0.344	0.18	0.00241029
NRCAM	1.61116e-06	-0.733828	0.34	0.189	0.00322233
RGS7	2.74271e-06	-0.308393	0.436	0.254	0.00548541
FGF12	3.91727e-06	-0.656843	0.332	0.18	0.00783455
CELF2	4.17556e-06	-0.408757	0.316	0.161	0.00835112
MAP2	8.79485e-06	-0.470422	0.348	0.203	0.0175897
SNAP25	1.06878e-05	-0.532327	0.36	0.214	0.0213756
NRG3	1.14434e-05	-0.557068	0.34	0.195	0.0228868
MDGA2	1.6862e-05	-0.502314	0.348	0.202	0.0337239
FGF14	3.28589e-05	-0.900287	0.356	0.212	0.0657178
BCAN	3.9591e-05	-0.313737	0.292	0.14	0.079182
PCDH7	5.25608e-05	-0.502971	0.304	0.159	0.105122
PLCB1	6.12727e-05	-0.309729	0.288	0.136	0.122545
VEGFA	7.32658e-05	-0.38968	0.272	0.13	0.146532
APOE	8.37567e-05	-0.491379	0.392	0.242	0.167513
GAL3ST1	0.00010085	0.255047	0.368	0.151	0.201701
DLGAP1	0.000201866	-0.504977	0.296	0.157	0.403732
PCSK1N	0.000256034	-0.302313	0.392	0.228	0.512068
GPM6A	0.000356025	-0.677896	0.344	0.212	0.71205
CSMD1	0.000573048	-1.03071	0.34	0.194	1
KAZN	0.000657708	-0.487368	0.372	0.349	1
P4HA1	0.000663939	-0.281511	0.412	0.242	1
DCC	0.00073428	-0.42072	0.356	0.199	1
LRRC4C	0.0012608	-0.983904	0.476	0.303	1
SPARCL1	0.00294433	-0.600818	0.376	0.245	1
DPP6	0.0029987	-0.440194	0.296	0.257	1
IGF1R	0.00385409	-0.348841	0.492	0.33	1
COL11A1	0.00419917	-0.400413	0.252	0.153	1
PPP3CA	0.00497646	-0.442265	0.34	0.292	1
LRRTM4	0.0051322	-0.790439	0.384	0.238	1
FRY	0.00570896	-0.34961	0.332	0.202	1
NEAT1	0.00678928	-0.268124	0.968	0.852	1
CNTN1	0.00813133	-0.619332	0.352	0.216	1
TMSB10	0.0127977	-0.370835	0.436	0.281	1
ADGRL3	0.0266358	-0.534271	0.46	0.313	1
GRID2	0.0521403	-0.405371	0.68	0.482	1
CNTNAP2	0.0689435	-0.589212	0.48	0.442	1
AGMO	0.0981585	0.393974	0.276	0.1	1
OPCML	0.101551	-0.918901	0.316	0.215	1
SLC35F1	0.109677	-0.463137	0.28	0.171	1
ERBB4	0.125021	-0.270492	0.844	0.717	1
RTN1	0.174942	-0.275675	0.368	0.298	1
SOX6	0.26051	-0.476002	0.268	0.161	1
EXOC6B	0.452164	-0.301335	0.816	0.637	1
LSAMP	0.484241	-0.271755	0.8	0.602	1
GRIK2	0.554287	-0.374076	0.268	0.171	1
CDK19	0.730345	-0.252893	0.792	0.595	1
ADARB2	0.783686	-0.312087	0.528	0.386	1
RORA	0.855891	-0.602245	0.384	0.298	1
PDZD2	0.913729	-0.517473	0.328	0.243	1
KLHL32	0.936278	-0.254015	0.796	0.624	1
NUPR1	0.964811	-0.42395	0.272	0.188	1

## Sheet: Late OPC2
row.names	p_val	avg_logFC	pct.1	pct.2	p_val_adj
SYT1	1.02179e-70	1.46277	0.524	0.166	2.04357e-67
SNAP25	2.79681e-64	1.20033	0.548	0.187	5.59362e-61
CHRM5	1.18577e-53	0.912215	0.597	0.255	2.37155e-50
MIR219A2	9.28841e-53	0.89282	0.853	0.567	1.85768e-49
HSPA1A	2.21717e-50	-0.919335	0.412	0.816	4.43435e-47
TMIGD3	3.07859e-46	0.902998	0.406	0.123	6.15718e-43
SPARCL1	1.9887e-44	1.03545	0.522	0.224	3.9774e-41
CLU	3.2455e-43	0.790299	0.833	0.492	6.491e-40
PTN	5.88064e-37	0.694463	0.651	0.336	1.17613e-33
VSNL1	1.40757e-35	0.899843	0.386	0.152	2.81515e-32
BEX1	2.54917e-34	0.758688	0.403	0.106	5.09835e-31
TMSB10	1.82173e-33	0.795636	0.559	0.261	3.64347e-30
NRGN	8.13014e-33	1.12223	0.401	0.168	1.62603e-29
APOE	6.17325e-30	1.00587	0.47	0.227	1.23465e-26
RNASE1	7.23032e-30	0.523387	0.839	0.575	1.44606e-26
CCK	2.2605e-28	0.905531	0.334	0.134	4.52099e-25
STMN2	4.49472e-27	0.878462	0.34	0.143	8.98944e-24
UCHL1	5.76406e-27	0.7538	0.493	0.207	1.15281e-23
PCSK1N	9.6142e-27	0.703747	0.45	0.215	1.92284e-23
GPM6A	2.46061e-23	0.44714	0.412	0.2	4.92123e-20
CHN1	6.55671e-23	0.781883	0.415	0.207	1.31134e-19
MAG	4.07489e-22	0.381293	0.893	0.685	8.14978e-19
PTGDS	4.24678e-22	0.253448	0.988	0.959	8.49356e-19
MAN2A1	6.2436e-22	-0.541793	0.87	0.874	1.24872e-18
SCG5	4.22473e-21	0.476773	0.496	0.263	8.44945e-18
CD9	2.262e-20	0.32868	0.795	0.519	4.524e-17
MDH1	2.48716e-20	0.423415	0.38	0.157	4.97431e-17
CAMK2B	4.71995e-20	0.481733	0.259	0.097	9.43991e-17
ENC1	1.00222e-19	0.691225	0.271	0.119	2.00443e-16
CALM3	1.32852e-19	0.555595	0.447	0.217	2.65703e-16
AVEN	4.98631e-19	0.492185	0.378	0.201	9.97261e-16
NEFL	7.13758e-19	0.506846	0.271	0.119	1.42752e-15
FTL	7.41397e-19	0.327584	0.98	0.889	1.48279e-15
GAP43	1.70903e-18	0.411226	0.251	0.105	3.41806e-15
CREG2	2.43729e-18	0.530805	0.3	0.137	4.87458e-15
PLLP	3.5966e-18	0.311314	0.418	0.202	7.1932e-15
PPFIA2	1.09326e-17	0.323286	0.582	0.328	2.18652e-14
BASP1	2.09002e-17	0.600204	0.3	0.141	4.18004e-14
FRY	3.75101e-17	0.455643	0.378	0.193	7.50202e-14
ITM2A	6.78532e-17	0.316272	0.265	0.124	1.35706e-13
SLC1A3	6.95684e-17	0.356787	0.608	0.35	1.39137e-13
NDUFA4	1.09802e-16	0.407735	0.611	0.354	2.19603e-13
ATP2B1	1.1034e-16	0.405576	0.386	0.197	2.20681e-13
MEF2C	2.86432e-16	0.49438	0.251	0.095	5.72864e-13
DPP10	7.18881e-16	0.545416	0.326	0.138	1.43776e-12
LAMA2	9.64823e-16	0.350035	0.386	0.181	1.92965e-12
LMO4	3.46023e-15	0.368765	0.303	0.128	6.92046e-12
CPE	3.76746e-15	0.545031	0.305	0.141	7.53493e-12
TPPP3	7.05088e-15	0.379832	0.614	0.381	1.41018e-11
PKM	8.50541e-15	0.540521	0.386	0.194	1.70108e-11
HSP90AB1	9.65692e-15	0.363387	0.775	0.518	1.93138e-11
DNM1	2.57802e-14	0.610197	0.274	0.134	5.15604e-11
THY1	6.84047e-14	0.477818	0.291	0.156	1.36809e-10
OLIG1	2.82681e-13	0.257076	0.695	0.43	5.65361e-10
PPP1R14A	1.95209e-12	0.272105	0.83	0.634	3.90418e-09
MT1E	2.53265e-12	0.388408	0.357	0.21	5.06531e-09
UTY	2.70221e-12	-0.666371	0.216	0.379	5.40443e-09
ENO2	4.4e-12	0.445881	0.34	0.164	8.8e-09
KCNAB1	5.36077e-12	0.439487	0.343	0.164	1.07215e-08
MT2A	5.62612e-12	0.363222	0.697	0.467	1.12522e-08
ALDOA	7.62089e-12	0.292047	0.599	0.397	1.52418e-08
RAB3A	1.79472e-11	0.502889	0.256	0.13	3.58944e-08
MAP1B	1.72832e-10	0.30767	0.798	0.567	3.45663e-07
NEDD4L	2.01628e-10	0.350371	0.271	0.159	4.03255e-07
HSP90AA1	2.03927e-10	-0.317893	0.922	0.881	4.07853e-07
DKK3	2.69366e-10	0.484836	0.314	0.191	5.38732e-07
TAGLN3	3.95403e-10	0.54982	0.256	0.115	7.90806e-07
SPTAN1	5.63621e-10	0.38503	0.259	0.129	1.12724e-06
TUBA1B	2.06894e-09	0.256789	0.637	0.43	4.13788e-06
CST3	2.29376e-09	0.474507	0.352	0.216	4.58752e-06
SPOCK1	2.73395e-09	-0.351752	0.844	0.838	5.46791e-06
CNTN1	4.51119e-09	0.307956	0.34	0.213	9.02239e-06
RBP1	2.06223e-08	0.439242	0.323	0.173	4.12446e-05
RTN1	2.79903e-08	0.468691	0.444	0.286	5.59805e-05
SLC25A46	3.53674e-08	0.301104	0.392	0.249	7.07349e-05
CAV1	3.84865e-08	0.258209	0.285	0.182	7.69731e-05
SLC1A2	1.15994e-07	0.32254	0.254	0.152	0.000231988
TUBB2A	1.96181e-07	0.341513	0.268	0.171	0.000392362
TTTY14	4.511e-07	-0.525522	0.164	0.269	0.0009022
NAPB	7.91431e-07	0.301148	0.259	0.162	0.00158286
YWHAH	2.41238e-06	0.405238	0.259	0.145	0.00482475
S100B	9.29391e-06	-0.431483	0.833	0.767	0.0185878
SEMA5A	1.50931e-05	-0.420716	0.17	0.26	0.0301863
ACSBG1	5.1748e-05	-0.450324	0.164	0.252	0.103496
ADAMTS18	5.53592e-05	-0.469218	0.167	0.252	0.110718
NAV2	8.95749e-05	-0.380253	0.271	0.352	0.17915
CA2	0.000812139	-0.357723	0.352	0.413	1
PDK4	0.00143729	-0.430543	0.311	0.364	1
LRP1B	0.00213235	-0.339215	0.522	0.384	1
NRXN1	0.00466932	-0.561689	0.28	0.208	1
RORA	0.00508686	-0.472766	0.274	0.309	1
GRIA4	0.00889711	-0.364911	0.3	0.33	1
NEAT1	0.010992	-0.263594	0.899	0.857	1
SCRG1	0.0240691	-0.323217	0.334	0.359	1
OPCML	0.0244476	-0.441009	0.268	0.217	1
AFF3	0.0259395	-0.322825	0.222	0.269	1
CSPP1	0.0297884	-0.404431	0.268	0.313	1
RBFOX1	0.0368916	-0.504548	0.34	0.373	1
IQCJ.SCHIP1	0.0584401	-0.3627	0.331	0.354	1
LRRTM4	0.0775799	-0.440799	0.288	0.245	1
MACROD2	0.0972242	-0.402294	0.343	0.365	1
CDKN1C	0.131463	-0.295198	0.334	0.341	1
SGCD	0.272846	-0.288949	0.329	0.339	1
LRRC4C	0.373489	-0.631897	0.357	0.311	1
TUBB2B	0.494792	-0.363234	0.305	0.311	1
NEGR1	0.540722	-0.26017	0.476	0.45	1
LGALS1	0.576394	-0.254957	0.308	0.307	1
PDZD2	0.822094	-0.398191	0.251	0.25	1
DPP6	0.874345	-0.305173	0.285	0.257	1

## Sheet: Late OPC1
row.names	p_val	avg_logFC	pct.1	pct.2	p_val_adj
CD9	1.64929e-23	0.435915	0.768	0.511	3.29858e-20
PTN	1.01325e-22	0.373217	0.587	0.332	2.02651e-19
RBFOX1	1.13366e-22	-1.514	0.244	0.391	2.26733e-19
CAV1	5.86984e-22	0.292476	0.349	0.166	1.17397e-18
UCHL1	3.94726e-21	-0.422475	0.15	0.253	7.89453e-18
SGK1	1.26888e-18	0.291125	0.862	0.684	2.53776e-15
PPFIA2	2.71905e-16	0.430052	0.553	0.321	5.43811e-13
RGCC	1.53376e-14	0.29998	0.764	0.564	3.06753e-11
CA2	4.02491e-13	0.370182	0.578	0.377	8.04981e-10
RNASE1	1.21884e-12	0.295754	0.781	0.572	2.43767e-09
UBC	4.08609e-11	0.29017	0.697	0.527	8.17218e-08
DPP6	7.15473e-11	-0.60728	0.209	0.269	1.43095e-07
RP11.384F7.2	7.107e-09	-0.377866	0.301	0.176	1.4214e-05
SCN1A	1.03226e-08	-0.257926	0.263	0.144	2.06453e-05
NUPR1	1.36506e-08	-0.281905	0.301	0.177	2.73012e-05
MAP1B	1.37228e-08	-0.3571	0.545	0.599	2.74457e-05
BASP1	2.36913e-07	-0.269251	0.255	0.141	0.000473827
NRGN	2.88098e-07	-0.254261	0.292	0.176	0.000576197
NEAT1	3.75315e-07	-0.290813	0.866	0.86	0.00075063
KLF12	4.01253e-07	-0.337965	0.273	0.157	0.000802506
NAV2	8.58572e-07	-0.567769	0.303	0.35	0.00171714
CST3	9.44943e-07	-0.319422	0.336	0.213	0.00188989
VSNL1	1.51581e-06	-0.276109	0.265	0.162	0.00303162
SEMA5A	2.34674e-06	-0.544569	0.221	0.256	0.00469347
SLC35F1	3.53562e-06	-0.437179	0.269	0.164	0.00707123
LRP1B	4.03568e-06	-0.789257	0.367	0.404	0.00807137
PCLO	4.40318e-06	-0.320191	0.265	0.161	0.00880635
SLC8A1	5.2026e-06	-0.31213	0.273	0.168	0.0104052
RANBP17	5.59761e-06	-0.268505	0.307	0.194	0.0111952
GRM5	6.89777e-06	-0.339736	0.257	0.153	0.0137955
S100B	2.4965e-05	-0.375084	0.814	0.767	0.0499299
RIMS1	3.31496e-05	-0.251026	0.267	0.161	0.0662993
PDE4D	0.000126926	-0.533979	0.405	0.422	0.253852
ADGRL3	0.000140215	-0.640706	0.309	0.327	0.28043
VCAN	0.000200964	-0.794961	0.267	0.17	0.401928
CNTNAP2	0.00026613	-0.501706	0.438	0.446	0.532259
B2M	0.000333649	0.334946	0.413	0.274	0.667298
THRB	0.000335684	-0.286054	0.276	0.181	0.671369
MACROD2	0.00038488	-0.645601	0.351	0.365	0.76976
LGALS1	0.000491229	-0.874943	0.294	0.31	0.982458
PON2	0.000618951	0.294287	0.418	0.285	1
DTNA	0.000691414	-0.572422	0.388	0.398	1
INPP4B	0.00127782	-0.272202	0.273	0.178	1
SYT1	0.00143352	-0.589894	0.273	0.192	1
PDZD2	0.00423431	-0.386939	0.336	0.235	1
FGF12	0.00596273	-0.662023	0.265	0.18	1
NRG3	0.00805021	-0.605112	0.276	0.194	1
TTTY14	0.0100178	-0.305322	0.342	0.243	1
TUBB2B	0.0126409	-0.713686	0.315	0.31	1
SCRG1	0.0138327	-0.465195	0.363	0.355	1
NRCAM	0.0138453	-0.774073	0.267	0.19	1
TRPS1	0.0257418	-0.344345	0.395	0.381	1
LAMA2	0.0317104	0.447708	0.303	0.186	1
P4HA1	0.0459533	-0.369142	0.28	0.25	1
SFMBT2	0.0719728	-0.25423	0.359	0.283	1
RORA	0.0725633	-0.458043	0.328	0.301	1
FGF14	0.0800982	-0.967197	0.282	0.213	1
OLIG2	0.100161	0.260914	0.307	0.2	1
GPM6A	0.111611	-0.607203	0.278	0.213	1
GRM7	0.135183	-0.501182	0.284	0.213	1
HDAC9	0.167163	-0.354349	0.28	0.253	1
CHN1	0.180642	-0.343104	0.286	0.219	1
MYLK	0.204002	-0.277445	0.43	0.415	1
USH1C	0.214933	-0.39165	0.286	0.228	1
SGCD	0.234662	-0.462435	0.359	0.334	1
MAPK10	0.244778	-0.3215	0.395	0.365	1
OPCML	0.26354	-1.06098	0.276	0.213	1
ZNF708	0.279553	-0.278908	0.493	0.459	1
PCSK1N	0.292007	-0.40396	0.29	0.232	1
SMOC1	0.295928	-0.363844	0.307	0.265	1
SPARCL1	0.332538	-0.538424	0.309	0.246	1
MAP2	0.335318	-0.425454	0.265	0.205	1
MSI2	0.345699	-0.290713	0.347	0.315	1
ENPP6	0.377353	-0.255903	0.257	0.229	1
SPARC	0.41503	-0.277192	0.317	0.28	1
ACSBG1	0.419769	-0.449523	0.292	0.234	1
LRRC4C	0.468068	-0.877807	0.376	0.306	1
PHACTR1	0.512396	-0.370481	0.303	0.266	1
SNAP25	0.570836	-0.460646	0.278	0.217	1
LRRTM4	0.659832	-0.981888	0.282	0.244	1
IQCJ.SCHIP1	0.691008	-0.40079	0.388	0.346	1
NRXN1	0.721617	-0.985959	0.251	0.21	1
GRID2	0.770384	-0.3139	0.564	0.486	1
AFF3	0.781959	-0.491323	0.301	0.258	1
CRB1	0.804614	-0.318535	0.251	0.197	1
RGS7	0.927983	-0.445253	0.309	0.261	1
MDGA2	0.961664	-0.563261	0.257	0.206	1

## Sheet: Early OPC2
row.names	p_val	avg_logFC	pct.1	pct.2	p_val_adj
TNR	9.97523e-201	3.00598	0.872	0.13	1.99505e-197
DSCAM	2.40758e-195	3.21032	0.885	0.148	4.81516e-192
OPCML	2.11384e-185	2.83035	0.904	0.174	4.22768e-182
CSMD1	2.17428e-179	2.95456	0.913	0.155	4.34856e-176
PCDH15	7.3515e-178	2.60233	0.743	0.047	1.4703e-174
PTPRZ1	2.15492e-174	2.70144	0.835	0.121	4.30984e-171
NRXN1	3.50323e-174	2.69116	0.922	0.165	7.00645e-171
KCNIP4	2.17497e-165	2.72623	0.908	0.132	4.34993e-162
LHFPL3	3.97496e-164	2.6666	0.812	0.09	7.94993e-161
NRCAM	7.27668e-156	2.43234	0.803	0.158	1.45534e-152
FGF14	5.49709e-155	2.68509	0.835	0.179	1.09942e-151
VCAN	5.36753e-149	2.41445	0.761	0.143	1.07351e-145
FAM155A	2.02204e-147	2.49255	0.771	0.115	4.04407e-144
KCND2	3.01927e-145	2.11061	0.624	0.07	6.03854e-142
LRRTM4	2.03144e-138	2.53029	0.835	0.207	4.06288e-135
CSMD3	1.37946e-130	2.16389	0.716	0.134	2.75891e-127
SNTG1	7.56697e-129	2.23701	0.638	0.071	1.51339e-125
MMP16	2.8289e-127	2.35223	0.683	0.119	5.65781e-124
ATRNL1	4.33002e-123	2.10457	0.693	0.116	8.66004e-120
ZFPM2	2.79398e-119	2.10814	0.688	0.098	5.58796e-116
FGF12	3.26883e-117	2.2645	0.711	0.155	6.53765e-114
DGKG	7.14199e-116	1.83639	0.56	0.086	1.4284e-112
LRRC4C	2.40883e-113	2.53157	0.853	0.278	4.81767e-110
PTPRG	2.83478e-113	1.93583	0.624	0.068	5.66957e-110
BRINP3	3.11708e-110	1.92265	0.592	0.096	6.23415e-107
NXPH1	1.91866e-109	1.8018	0.505	0.064	3.83732e-106
MDGA2	2.32944e-107	1.8676	0.734	0.176	4.65888e-104
PDZD2	7.99068e-107	1.83	0.789	0.211	1.59814e-103
DLGAP1	9.48e-106	1.90552	0.67	0.132	1.896e-102
CA10	1.19028e-104	2.0527	0.55	0.085	2.38057e-101
LUZP2	2.41456e-103	2.06507	0.619	0.097	4.82912e-100
CHL1	1.23448e-102	1.84239	0.578	0.1	2.46895e-99
GPM6A	4.47157e-98	1.95517	0.706	0.188	8.94315e-95
DPP10	1.5039e-97	1.81514	0.665	0.122	3.00781e-94
DPP6	2.87521e-97	1.78987	0.817	0.22	5.75042e-94
LRP1B	7.07872e-97	1.98101	0.908	0.362	1.41574e-93
SOX6	6.42336e-96	2.00229	0.638	0.136	1.28467e-92
MAML2	6.80864e-96	1.8637	0.683	0.119	1.36173e-92
CTNNA2	9.61892e-95	1.88354	0.679	0.156	1.92378e-91
TMEM132C	5.80764e-94	1.83316	0.619	0.091	1.16153e-90
NRG3	6.20011e-94	1.96126	0.665	0.173	1.24002e-90
HS6ST3	1.83653e-92	1.71223	0.523	0.068	3.67305e-89
NTRK3	9.64848e-92	1.42134	0.541	0.083	1.9297e-88
PCDH7	4.47055e-91	1.84095	0.619	0.138	8.94111e-88
ADGRL3	6.64878e-88	1.69337	0.835	0.288	1.32976e-84
SLC35F1	3.32689e-87	1.87605	0.61	0.148	6.65378e-84
GRIK2	6.23175e-87	1.72929	0.638	0.146	1.24635e-83
SOX5	2.28088e-86	1.74712	0.514	0.06	4.56176e-83
XKR4	5.81016e-85	1.32693	0.422	0.061	1.16203e-81
SLC1A2	1.37457e-81	1.72716	0.583	0.132	2.74915e-78
RORA	5.84601e-80	1.7594	0.789	0.27	1.1692e-76
CNTN1	6.69442e-78	1.57702	0.665	0.195	1.33888e-74
RP11.384F7.2	5.89419e-77	1.87632	0.601	0.165	1.17884e-73
COL11A1	2.6177e-76	1.69311	0.55	0.133	5.2354e-73
GRM5	5.26832e-73	1.61034	0.55	0.141	1.05366e-69
LSAMP	6.41567e-73	1.28655	0.982	0.591	1.28313e-69
CELF2	1.19312e-72	1.52198	0.578	0.144	2.38624e-69
CNTNAP5	2.04075e-70	1.59785	0.468	0.072	4.0815e-67
MEG3	4.65886e-67	1.41658	0.472	0.079	9.31773e-64
MAP2	2.21635e-66	1.47165	0.61	0.186	4.43269e-63
BCAN	7.01053e-66	1.54868	0.523	0.125	1.40211e-62
SHISA9	5.32525e-62	1.3382	0.394	0.058	1.06505e-58
DCC	4.26326e-61	1.337	0.624	0.182	8.52652e-58
HECW1	1.00661e-60	0.949217	0.271	0.03	2.01323e-57
GRIK1	2.37557e-59	1.59833	0.5	0.134	4.75115e-56
SEZ6L	2.92543e-59	1.50129	0.44	0.08	5.85086e-56
FLRT2	5.42649e-59	1.20248	0.33	0.053	1.0853e-55
ARPP21	7.06535e-57	1.21396	0.468	0.086	1.41307e-53
PARD3	3.00568e-56	1.50346	0.495	0.12	6.01136e-53
KCNMA1	3.35411e-56	1.30937	0.505	0.124	6.70821e-53
GRID2	3.83329e-56	1.12734	0.876	0.47	7.66658e-53
PLP1	5.64363e-56	-0.800742	0.757	0.997	1.12873e-52
SLC8A1	1.89138e-54	1.44127	0.514	0.16	3.78275e-51
COL9A1	1.89892e-54	1.21899	0.326	0.024	3.79785e-51
NEBL	4.6578e-54	1.21006	0.44	0.108	9.31559e-51
SMOC1	9.88508e-54	1.30534	0.647	0.245	1.97702e-50
SORCS3	2.04639e-53	1.38797	0.376	0.056	4.09279e-50
SPARCL1	1.21179e-52	1.29876	0.615	0.229	2.42359e-49
PLCB1	1.36809e-52	1.60298	0.463	0.125	2.73618e-49
GRM7	5.23893e-51	1.57014	0.56	0.199	1.04779e-47
SCN1A	2.01607e-50	1.44132	0.468	0.14	4.03213e-47
MAN2A1	1.7836e-49	-1.16023	0.601	0.893	3.5672e-46
CCSER1	1.54163e-48	1.10264	0.372	0.065	3.08325e-45
RP4.668E10.4	1.21619e-47	1.21908	0.372	0.088	2.43238e-44
CPE	3.0165e-47	1.03925	0.491	0.135	6.03301e-44
PITPNC1	5.5831e-47	1.48046	0.463	0.142	1.11662e-43
FERMT1	1.54423e-46	0.992987	0.266	0.041	3.08846e-43
CDH10	1.76189e-46	1.22213	0.381	0.094	3.52377e-43
TMEM132D	1.03467e-45	1.26812	0.358	0.068	2.06934e-42
DAB1	4.21861e-45	1.14248	0.532	0.181	8.43723e-42
PDZRN4	8.82119e-44	1.13778	0.307	0.037	1.76424e-40
TOX	1.73828e-42	1.35306	0.39	0.106	3.47656e-39
CRYAB	2.25952e-42	-0.794979	0.72	0.97	4.51904e-39
TMEM108	7.88849e-42	1.14279	0.335	0.06	1.5777e-38
PDGFRA	1.69794e-41	1.05645	0.317	0.058	3.39587e-38
KCNIP1	4.98892e-41	0.910401	0.28	0.042	9.97784e-38
SEMA3E	6.82624e-41	1.05177	0.335	0.063	1.36525e-37
FAM110B	9.91737e-40	1.00062	0.317	0.065	1.98347e-36
HSPA1A	1.12821e-39	-1.18666	0.427	0.797	2.25642e-36
RGS7	4.7971e-39	1.05941	0.583	0.245	9.5942e-36
SEMA5A	9.77998e-39	1.26847	0.578	0.227	1.956e-35
KAZN	1.11201e-38	1.16648	0.72	0.324	2.22402e-35
NLGN4X	3.17611e-38	1.25259	0.468	0.163	6.35221e-35
KIAA1217	3.85894e-38	1.01514	0.362	0.082	7.71787e-35
MBP	1.11619e-37	-0.78576	0.752	0.964	2.23238e-34
ARHGAP42	1.68636e-37	0.906635	0.261	0.052	3.37273e-34
HSP90AA1	4.37131e-37	-0.837469	0.716	0.898	8.74262e-34
KLF12	5.38484e-37	1.40032	0.436	0.155	1.07697e-33
DGKB	8.80587e-37	0.995221	0.33	0.066	1.76117e-33
ASCL1	1.53509e-36	0.982045	0.289	0.056	3.07019e-33
POU6F2	1.78642e-36	1.11165	0.275	0.049	3.57284e-33
CSGALNACT1	1.7993e-36	1.30624	0.399	0.13	3.5986e-33
CST3	2.38163e-36	1.22332	0.523	0.21	4.76326e-33
PDE7B	1.19349e-35	1.15635	0.33	0.088	2.38699e-32
MPPED2	9.63145e-35	1.00139	0.321	0.081	1.92629e-31
PIP4K2A	1.57452e-34	-0.657218	0.752	0.968	3.14904e-31
KHDRBS3	6.02085e-34	0.948574	0.427	0.13	1.20417e-30
GRIA4	1.14338e-32	1.09527	0.638	0.305	2.28676e-29
CACNA2D3	8.12205e-32	1.10334	0.339	0.095	1.62441e-28
RIMS2	1.17668e-31	1.07277	0.335	0.096	2.35336e-28
RALYL	1.49507e-31	1.3145	0.349	0.103	2.99014e-28
SORCS1	3.03356e-31	0.84486	0.294	0.066	6.06711e-28
ADCY2	2.37922e-30	0.945206	0.326	0.092	4.75843e-27
APCDD1	9.60725e-30	0.84105	0.312	0.075	1.92145e-26
NOL4	1.02137e-29	0.945509	0.294	0.074	2.04274e-26
UST	1.05711e-29	1.21983	0.317	0.088	2.11422e-26
MAST4	2.33475e-29	0.89084	0.326	0.084	4.6695e-26
NAV2	4.40996e-29	0.867351	0.647	0.321	8.81992e-26
CHST9	4.57537e-29	0.949399	0.303	0.085	9.15074e-26
PID1	4.93709e-29	1.17603	0.321	0.089	9.87419e-26
CADPS	9.67388e-29	0.935169	0.312	0.088	1.93478e-25
SLC24A3	1.9301e-28	0.98037	0.317	0.097	3.8602e-25
NTRK2	6.16524e-28	0.752838	0.463	0.171	1.23305e-24
PPP3CA	1.52845e-27	0.712957	0.596	0.274	3.05689e-24
TF	5.69909e-27	-0.728068	0.587	0.838	1.13982e-23
STXBP5L	7.62921e-26	0.89607	0.261	0.072	1.52584e-22
RAMP1	4.1475e-25	0.973003	0.431	0.186	8.295e-22
TMEM132B	4.44155e-25	0.9904	0.326	0.103	8.8831e-22
CDH13	7.70242e-25	0.767769	0.358	0.124	1.54048e-21
FMN2	1.49089e-24	0.978249	0.362	0.141	2.98179e-21
SORBS1	3.1043e-24	0.948946	0.381	0.149	6.2086e-21
ERBB4	3.14972e-24	0.624016	0.927	0.712	6.29944e-21
ADARB2	6.11102e-24	0.836649	0.683	0.376	1.2222e-20
NKAIN3	6.60013e-24	1.14383	0.335	0.126	1.32003e-20
FAM19A1	7.36404e-23	0.986699	0.261	0.076	1.47281e-19
FRYL	8.29186e-23	-0.723474	0.638	0.836	1.65837e-19
ALK	3.81944e-22	0.97007	0.367	0.153	7.63887e-19
OXR1	6.17313e-22	0.690775	0.385	0.152	1.23463e-18
SPP1	1.40698e-21	-0.653424	0.624	0.863	2.81396e-18
MT1E	3.65967e-21	1.0182	0.431	0.211	7.31935e-18
SATB1	8.54508e-21	0.552586	0.261	0.081	1.70902e-17
SNAP25	9.63195e-21	0.849682	0.44	0.21	1.92639e-17
KCNAB1	9.34874e-20	0.50822	0.399	0.168	1.86975e-16
OLIG2	1.10833e-19	0.561237	0.45	0.199	2.21665e-16
THRB	2.33723e-19	0.950224	0.381	0.181	4.67447e-16
RBMS3	2.09558e-18	0.964242	0.303	0.126	4.19116e-15
PTN	2.1843e-18	0.565302	0.619	0.351	4.3686e-15
PTGDS	3.3701e-18	-0.452412	0.83	0.971	6.74019e-15
ERC2	3.37724e-18	0.70453	0.399	0.188	6.75448e-15
DCLK2	4.04072e-18	0.892512	0.358	0.168	8.08145e-15
FRY	5.04209e-18	0.773303	0.404	0.199	1.00842e-14
OLIG1	6.01617e-18	0.580091	0.72	0.439	1.20323e-14
CNTN3	8.36483e-18	0.898869	0.321	0.141	1.67297e-14
MT2A	2.19673e-17	0.68361	0.711	0.476	4.39347e-14
PPFIA2	2.72408e-17	0.518214	0.61	0.337	5.44816e-14
SGCD	3.49443e-17	0.580699	0.56	0.322	6.98887e-14
ENPP2	5.9687e-17	-0.579095	0.587	0.801	1.19374e-13
FAM19A2	6.86543e-17	0.99422	0.303	0.135	1.37309e-13
LIMCH1	1.74372e-16	-0.602232	0.573	0.784	3.48745e-13
MYT1L	2.34739e-16	0.875017	0.252	0.091	4.69477e-13
THSD7A	3.17282e-16	0.856495	0.252	0.096	6.34563e-13
MAPK10	3.92e-16	0.618083	0.587	0.354	7.84001e-13
DTNA	5.38747e-16	0.634723	0.601	0.382	1.07749e-12
SYNE1	5.79092e-16	0.636004	0.413	0.204	1.15818e-12
ESRRG	6.31785e-15	0.839456	0.362	0.187	1.26357e-11
PRRX1	5.41931e-14	0.939001	0.257	0.112	1.08386e-10
NEAT1	7.22292e-14	-0.555655	0.683	0.874	1.44458e-10
PALLD	9.00899e-14	0.768934	0.271	0.118	1.8018e-10
HLA.B	1.34097e-13	0.755064	0.326	0.168	2.68194e-10
ATP1B2	1.47116e-13	0.746086	0.252	0.104	2.94233e-10
ATP2B1	4.61049e-13	0.492011	0.394	0.205	9.22099e-10
ATP1B1	5.78432e-13	-0.564143	0.583	0.734	1.15686e-09
PTPRN2	9.40199e-13	0.729746	0.271	0.13	1.8804e-09
NBEA	1.57266e-12	0.517341	0.445	0.258	3.14532e-09
PRKD1	1.62199e-12	0.575396	0.307	0.155	3.24399e-09
S100B	2.28385e-12	-0.685182	0.725	0.777	4.5677e-09
HLA.A	6.2254e-12	0.783275	0.385	0.229	1.24508e-08
DIAPH2	8.30007e-12	0.758668	0.312	0.168	1.66001e-08
SCRG1	1.19936e-11	0.585615	0.537	0.343	2.39871e-08
LMO4	1.56739e-11	0.314095	0.275	0.137	3.13478e-08
CAMSAP2	1.68609e-11	0.584706	0.459	0.287	3.37218e-08
DMD	2.20254e-11	0.413508	0.72	0.513	4.40507e-08
MACROD2	2.94344e-11	0.548428	0.532	0.351	5.88688e-08
PKM	8.97108e-11	0.331544	0.367	0.204	1.79422e-07
SOX2	1.20674e-10	0.273326	0.312	0.158	2.41349e-07
MIR99AHG	1.6763e-10	0.359756	0.734	0.528	3.3526e-07
PCSK1N	2.69605e-10	0.604417	0.385	0.23	5.3921e-07
PDE4D	3.18744e-10	0.433866	0.592	0.407	6.37487e-07
MT1X	4.10191e-10	0.669885	0.266	0.146	8.20382e-07
B2M	6.99796e-10	0.33966	0.477	0.281	1.39959e-06
NCALD	1.40068e-09	0.819362	0.261	0.135	2.80135e-06
TMSB10	2.34291e-09	0.360234	0.45	0.281	4.68582e-06
MGLL	2.40358e-09	0.776323	0.28	0.16	4.80716e-06
PLEKHA5	5.07621e-09	0.550609	0.275	0.161	1.01524e-05
KCNQ3	5.37212e-09	0.717995	0.298	0.178	1.07442e-05
CRB1	5.37877e-09	0.507573	0.335	0.196	1.07575e-05
HDAC9	6.37882e-09	0.49904	0.39	0.248	1.27576e-05
SPOCK1	1.0832e-08	-0.406509	0.817	0.84	2.1664e-05
MYLK	1.27909e-08	-0.694172	0.252	0.429	2.55817e-05
SLC1A3	1.51027e-08	0.385458	0.541	0.366	3.02054e-05
APOE	2.47302e-08	0.693507	0.372	0.245	4.94603e-05
TMEM178B	2.94329e-08	0.73001	0.28	0.169	5.88658e-05
ADAMTS18	3.29072e-08	-0.427325	0.087	0.254	6.58145e-05
KALRN	9.43285e-08	0.495092	0.271	0.166	0.000188657
MSI2	1.01268e-07	0.383741	0.454	0.31	0.000202537
NEGR1	1.28816e-07	0.373748	0.592	0.443	0.000257633
DDAH1	1.59626e-07	0.708889	0.252	0.143	0.000319251
FGFR2	1.96303e-07	-0.543686	0.463	0.586	0.000392607
FTL	2.18437e-07	-0.335811	0.803	0.905	0.000436873
BASP1	2.411e-07	0.470794	0.257	0.15	0.0004822
PPP1R14A	4.51415e-07	-0.453675	0.55	0.663	0.000902829
RFX3	5.0965e-07	0.362599	0.454	0.317	0.0010193
CA2	1.4002e-06	-0.598954	0.266	0.416	0.0028004
RIMS1	2.02718e-06	0.624568	0.261	0.17	0.00405436
LGALS1	2.07048e-06	-0.654712	0.156	0.318	0.00414096
TRA2B	3.00436e-06	0.295006	0.312	0.203	0.00600873
CLU	3.0561e-06	0.290161	0.679	0.517	0.00611221
ACSBG1	4.07966e-06	-0.333294	0.11	0.252	0.00815931
PWRN1	3.81754e-05	-0.374469	0.151	0.284	0.0763508
ARHGAP32	4.07827e-05	0.316386	0.33	0.238	0.0815654
TMEM151A	6.71667e-05	-0.534462	0.229	0.362	0.134333
IGF1R	0.000106275	0.320509	0.436	0.336	0.212551
DYNC2H1	0.000106988	0.434271	0.266	0.193	0.213975
PDK4	0.000107407	-0.682875	0.234	0.368	0.214813
CHN1	0.000116083	0.392	0.303	0.224	0.232165
KLK6	0.000169639	-0.595969	0.271	0.388	0.339279
UBC	0.000176306	-0.35568	0.468	0.558	0.352611
FOCAD	0.000225997	0.408596	0.271	0.2	0.451994
MAP1B	0.000236632	-0.385282	0.518	0.597	0.473264
SFMBT2	0.000293837	-0.388001	0.183	0.302	0.587674
SIRT2	0.000297844	-0.450858	0.372	0.464	0.595688
IQGAP1	0.000466809	-0.428467	0.394	0.488	0.933617
DBI	0.000596845	0.270111	0.486	0.386	1
RGCC	0.00121636	-0.385262	0.573	0.595	1
ZNF708	0.00130974	-0.32443	0.362	0.471	1
EXOC6B	0.00183102	-0.327709	0.596	0.655	1
SYT1	0.00199008	0.577406	0.252	0.2	1
APC2	0.00389964	0.261891	0.271	0.216	1
TUBA1B	0.00653645	-0.427099	0.404	0.455	1
CDK19	0.00839523	-0.319078	0.578	0.612	1
RAB30	0.00948671	-0.303437	0.358	0.435	1
CDKN1C	0.0112805	-0.420957	0.252	0.346	1
IQCJ.SCHIP1	0.0172	-0.338706	0.275	0.358	1
KLHL32	0.0182914	-0.277045	0.587	0.641	1
SPARC	0.0276678	-0.284318	0.206	0.291	1
MAPK8IP1	0.0615974	-0.434032	0.216	0.298	1
TMEM63A	0.0864311	-0.423901	0.183	0.262	1
NLK	0.0949858	-0.344387	0.408	0.443	1
CHRM5	0.123511	0.266122	0.312	0.29	1
TTTY14	0.218337	0.441155	0.261	0.257	1
TPPP3	0.24882	-0.257693	0.385	0.407	1
OTUD7B	0.255272	-0.313654	0.298	0.339	1
TMCC2	0.382417	-0.311158	0.234	0.283	1
CYTH1	0.751239	-0.318665	0.33	0.34	1

## Sheet: Ealry OPC1
row.names	p_val	avg_logFC	pct.1	pct.2	p_val_adj
RHOJ	8.01157e-300	0.261708	0.944	0.019	1.60231e-296
KCNT2	2.05293e-295	0.303134	1	0.03	4.10585e-292
ARHGAP42	9.07682e-232	0.520761	1	0.045	1.81536e-228
RP11.586K2.1	9.07441e-217	0.258838	1	0.052	1.81488e-213
FLRT2	2.03833e-192	0.283027	0.986	0.051	4.07665e-189
PLCB4	2.49078e-187	0.288551	1	0.051	4.98157e-184
STXBP5L	7.49588e-168	0.260447	0.986	0.065	1.49918e-164
FERMT1	3.53077e-166	0.914693	0.901	0.037	7.06154e-163
XKR4	7.78086e-161	0.33305	0.986	0.065	1.55617e-157
EGFR	1.99345e-158	0.539259	1	0.079	3.9869e-155
POU6F2	7.98216e-154	0.384693	1	0.043	1.59643e-150
BGN	2.42682e-152	0.30129	0.972	0.07	4.85365e-149
RP4.668E10.4	2.64496e-143	0.584433	1	0.087	5.28992e-140
STK33	5.12913e-138	0.279976	1	0.094	1.02583e-134
CSPG4	5.20643e-137	0.398003	0.972	0.083	1.04129e-133
UBE2C	4.30164e-130	0.425644	0.282	0	8.60327e-127
GAD1	2.32806e-129	0.401717	0.859	0.041	4.65613e-126
ABLIM1	1.12808e-125	0.363814	1	0.08	2.25616e-122
DGKG	2.78856e-124	0.494178	1	0.098	5.57712e-121
SLC24A3	2.13592e-121	0.352694	1	0.092	4.27183e-118
ROBO2	1.89422e-120	0.329173	1	0.058	3.78843e-117
CNKSR2	3.88242e-120	0.301452	0.958	0.047	7.76483e-117
PDZRN4	8.18535e-120	0.356295	1	0.034	1.63707e-116
OSBPL6	2.19761e-118	0.2585	1	0.041	4.39523e-115
PRRX1	3.98965e-118	0.42615	0.986	0.102	7.97931e-115
SH3GL2	1.02578e-116	0.292429	0.986	0.109	2.05156e-113
KCND2	3.44018e-116	0.808345	1	0.087	6.88037e-113
PDE7B	1.73978e-114	0.632991	0.944	0.085	3.47956e-111
ISG15	1.12746e-113	0.412936	1	0.127	2.25491e-110
CHST9	1.18413e-113	0.337419	0.986	0.08	2.36826e-110
SORCS3	1.89491e-113	0.447542	1	0.057	3.78982e-110
LRFN5	6.15964e-111	0.360496	0.915	0.044	1.23193e-107
TMEM132D	1.776e-110	0.282059	1	0.067	3.55201e-107
AKAP12	1.06474e-109	0.266672	0.958	0.098	2.12948e-106
NEBL	2.36451e-107	0.352394	1	0.111	4.72901e-104
UST	5.95644e-107	0.344669	0.986	0.084	1.19129e-103
CCSER1	1.23805e-106	0.682967	1	0.065	2.4761e-103
SYT17	2.11154e-105	0.281842	0.944	0.096	4.22307e-102
CAMK4	8.90906e-105	0.315999	0.915	0.041	1.78181e-101
SDK1	4.91126e-104	0.253687	0.958	0.094	9.82252e-101
CDH10	1.13065e-103	0.411581	0.944	0.094	2.26131e-100
CSGALNACT1	1.49603e-103	0.412825	1	0.129	2.99206e-100
RBMS3	1.2873e-102	0.501916	1	0.119	2.57459e-99
BRINP3	6.63659e-102	0.702545	1	0.109	1.32732e-98
HS6ST3	1.32929e-101	0.455379	1	0.078	2.65857e-98
CNTNAP5	1.04556e-96	0.774962	1	0.079	2.09111e-93
ADCY2	2.63949e-96	0.279174	0.986	0.088	5.27897e-93
MT1M	9.43523e-96	0.46973	1	0.151	1.88705e-92
RALYL	3.04627e-95	0.404958	0.986	0.1	6.09255e-92
sep-07	1.4835e-93	0.529877	0.732	0.004	2.96699e-90
FAM19A1	1.30792e-92	0.477133	0.93	0.07	2.61584e-89
GRIK1	7.14186e-91	0.929968	1	0.14	1.42837e-87
DGKB	8.31479e-91	0.448433	1	0.064	1.66296e-87
GRM5	9.07605e-90	0.726536	1	0.15	1.81521e-86
PCDH15	9.81369e-89	1.33451	0.986	0.074	1.96274e-85
LINC00693	1.24233e-88	0.327077	1	0.159	2.48466e-85
KCTD16	2.18548e-87	0.398767	1	0.146	4.37095e-84
HLA.B	2.71671e-86	0.286289	1	0.161	5.43342e-83
NTRK3	1.29289e-84	0.861177	0.958	0.095	2.58577e-81
SLC8A1	4.90313e-84	0.831051	1	0.166	9.80626e-81
KLF12	8.6608e-84	0.679531	0.986	0.156	1.73216e-80
PTPRG	2.78176e-83	0.847722	1	0.085	5.56353e-80
NKAIN3	5.94645e-83	0.698097	0.944	0.122	1.18929e-79
PITPNC1	3.75198e-82	0.333916	0.986	0.145	7.50396e-79
COL11A1	1.81864e-81	0.834214	0.972	0.143	3.63729e-78
SLC1A2	1.91645e-81	0.613944	1	0.144	3.8329e-78
RIMS2	1.22314e-80	0.540838	0.93	0.093	2.44628e-77
TMEM108	2.52751e-80	0.749213	0.93	0.059	5.05503e-77
KCNQ3	4.32256e-80	0.449373	1	0.168	8.64512e-77
ETV1	1.54526e-79	0.839365	0.901	0.112	3.09051e-76
CSMD3	2.2682e-79	0.92471	1	0.154	4.5364e-76
ATRNL1	1.00162e-78	0.860873	1	0.136	2.00323e-75
RIMS1	1.99373e-78	0.410119	1	0.158	3.98747e-75
MMP16	7.09107e-78	1.28464	0.972	0.138	1.41821e-74
RP11.384F7.2	1.02086e-77	0.771539	1	0.176	2.04173e-74
DIAPH2	3.18447e-77	0.329196	1	0.159	6.36894e-74
PLCB1	5.80359e-76	0.334866	0.944	0.13	1.16072e-72
SCN1A	2.38303e-75	0.591089	0.944	0.144	4.76606e-72
DLGAP1	1.01756e-73	0.818913	1	0.149	2.03512e-70
ZFPM2	1.45091e-73	0.80155	1	0.118	2.90182e-70
NRCAM	3.76257e-73	1.12633	1	0.183	7.52514e-70
DUSP1	2.35438e-72	0.562128	0.93	0.058	4.70876e-69
CDH13	8.07138e-72	0.379672	1	0.121	1.61428e-68
PCDH7	1.03434e-70	0.890028	0.972	0.152	2.06869e-67
NRG3	1.04329e-70	0.823476	1	0.188	2.08658e-67
FAM155A	1.62579e-70	0.791188	1	0.14	3.25159e-67
DCLK2	2.11558e-70	0.337523	0.972	0.163	4.23117e-67
AGMO	3.20624e-70	-0.256094	1	0.094	6.41248e-67
KCNMA1	2.41329e-69	0.271295	1	0.131	4.82659e-66
DSCAM	5.91255e-69	1.22211	0.986	0.18	1.18251e-65
TNR	2.97271e-68	1.10469	0.972	0.162	5.94543e-65
GRIA1	3.35306e-68	0.380781	0.831	0.081	6.70612e-65
SOX5	4.13487e-67	0.767585	0.915	0.072	8.26974e-64
SLC35F1	8.3804e-67	1.14833	0.944	0.162	1.67608e-63
GRIK2	1.14929e-66	0.858947	1	0.16	2.29857e-63
FGF14	2.09769e-66	1.04721	1	0.205	4.19539e-63
TMEM132C	3.62019e-66	0.367964	1	0.107	7.24039e-63
sep-08	1.13153e-65	0.37247	0.31	0.004	2.26306e-62
MPPED2	5.78996e-65	0.611834	0.845	0.08	1.15799e-61
MOK	3.56006e-64	0.377284	0.803	0.025	7.12011e-61
CTNNA2	6.03205e-64	0.777044	1	0.173	1.20641e-60
FGF12	6.98671e-64	1.4167	0.958	0.175	1.39734e-60
PRKD1	3.01711e-63	0.251196	1	0.147	6.03421e-60
CADPS	1.03858e-62	0.571479	0.901	0.085	2.07716e-59
RAB3B	1.81552e-62	0.303239	0.296	0.022	3.63104e-59
OPCML	2.32892e-62	0.957516	1	0.205	4.65785e-59
DPP10	1.36633e-61	0.459384	1	0.139	2.73266e-58
SOX6	1.61971e-61	1.18446	0.944	0.152	3.23941e-58
GRM7	8.72508e-61	0.488461	1	0.206	1.74502e-57
BTBD8	9.55185e-61	-0.34593	1	0.116	1.91037e-57
CHL1	2.46262e-60	0.698263	0.887	0.115	4.92524e-57
MDGA2	1.25089e-59	0.587259	1	0.196	2.50177e-56
THSD7A	1.35579e-58	0.57826	0.831	0.091	2.71158e-55
CSMD1	3.5362e-58	0.86549	1	0.188	7.0724e-55
VCAN	2.40047e-57	1.55737	0.915	0.168	4.80094e-54
MAML2	3.15898e-56	0.925533	1	0.137	6.31795e-53
FSTL5	5.68566e-56	-0.404929	1	0.194	1.13713e-52
SEZ6L	9.20927e-56	0.930842	0.873	0.087	1.84185e-52
MGLL	1.79279e-55	0.792828	0.915	0.151	3.58558e-52
LRRTM4	3.02697e-55	0.926578	1	0.233	6.05394e-52
CELF2	3.38853e-55	0.780453	0.93	0.156	6.77706e-52
LHFPL3	6.17296e-54	0.608284	0.958	0.12	1.23459e-50
PRELID2	7.90235e-54	-0.25549	1	0.179	1.58047e-50
SNTG1	1.09956e-53	0.968607	0.873	0.092	2.19911e-50
PARD3	1.34735e-53	0.273088	0.93	0.128	2.69469e-50
NEUROD6	1.90732e-53	0.286344	0.31	0.023	3.81465e-50
APCDD1	8.07756e-53	0.559316	0.915	0.073	1.61551e-49
ASTN1	1.17994e-52	0.465094	0.859	0.087	2.35987e-49
OXR1	4.72085e-51	0.342978	1	0.149	9.4417e-48
SHISA9	1.36943e-50	0.770947	0.817	0.064	2.73887e-47
TOX	1.83236e-50	0.52142	0.831	0.109	3.66472e-47
KCNH1	3.97612e-50	-0.288043	1	0.177	7.95224e-47
LUZP2	1.98556e-49	0.985304	0.887	0.115	3.97111e-46
EYA4	3.49048e-49	-0.266188	1	0.192	6.98097e-46
SPARCL1	6.51973e-49	0.331116	1	0.239	1.30395e-45
BCAN	7.75373e-49	0.984328	0.873	0.136	1.55075e-45
HMOX1	1.45056e-48	1.23711	0.254	0.065	2.90112e-45
MAP2	2.66233e-48	0.964854	0.93	0.198	5.32466e-45
PDZD2	3.37037e-48	0.75507	1	0.233	6.74075e-45
BMPER	7.04491e-48	0.395246	0.803	0.085	1.40898e-44
FABP7	1.08836e-47	0.570567	0.775	0.06	2.17671e-44
PTPRZ1	3.17904e-47	1.06607	0.901	0.153	6.35808e-44
DCC	6.42923e-47	0.710555	1	0.194	1.28585e-43
KCNIP4	1.74809e-46	0.785142	1	0.165	3.49619e-43
KHDRBS3	3.8967e-46	0.485087	0.958	0.132	7.79339e-43
NUPR1	1.14778e-45	-0.438189	0.986	0.177	2.29555e-42
CAPS2	1.55983e-45	-0.253459	1	0.231	3.11966e-42
EMP2	1.60432e-45	0.591291	0.746	0.066	3.20864e-42
GPM6A	2.22038e-45	1.04358	0.915	0.207	4.44076e-42
NKRF	3.36187e-45	0.261391	0.845	0.11	6.72375e-42
JAK1	1.2206e-44	0.254302	0.958	0.174	2.44121e-41
ANKUB1	2.70625e-44	-0.364455	1	0.199	5.41251e-41
APOE	6.14443e-43	-0.369077	1	0.236	1.22889e-39
NTRK2	1.67663e-42	0.418935	1	0.172	3.35326e-39
CPE	3.54115e-42	0.518745	0.915	0.142	7.0823e-39
ATP6AP1L	5.68556e-42	-0.325846	1	0.189	1.13711e-38
BASP1	8.42942e-42	0.954145	0.831	0.142	1.68588e-38
SEMA3E	2.92086e-41	0.385034	0.803	0.065	5.84171e-38
SMOC1	6.44878e-40	0.742705	0.986	0.256	1.28976e-36
NLGN4X	9.27773e-40	0.496883	0.901	0.167	1.85555e-36
LRRC4C	3.00432e-39	0.966895	1	0.301	6.00864e-36
USH1C	5.39339e-39	-0.303406	1	0.219	1.07868e-35
LAMA2	4.68238e-37	-0.668451	1	0.185	9.36476e-34
CDH8	1.36028e-36	-0.468378	1	0.208	2.72057e-33
IGFBP2	5.22211e-36	0.322089	0.38	0.004	1.04442e-32
ELOVL7	1.15562e-35	-0.432212	1	0.223	2.31124e-32
NRXN1	1.2212e-35	1.29646	0.901	0.201	2.44239e-32
NXPH1	2.47171e-35	0.882691	0.746	0.079	4.94342e-32
BHLHE41	3.06511e-35	-0.456711	1	0.185	6.13022e-32
DPP6	6.04648e-35	0.931311	1	0.243	1.2093e-31
ACSBG1	3.14865e-34	-0.370529	1	0.226	6.29731e-31
ELAVL4	7.10697e-34	0.366714	0.746	0.071	1.42139e-30
XRN1	3.89669e-33	-0.27778	0.986	0.217	7.79338e-30
PDGFRA	8.07371e-33	0.734783	0.746	0.06	1.61474e-29
LMO4	1.32951e-32	0.314547	0.887	0.13	2.65901e-29
PARD3B	2.79222e-32	-0.362284	1	0.262	5.58443e-29
PHACTR1	5.69438e-32	-0.368143	1	0.255	1.13888e-28
SLC25A46	7.58487e-32	-0.340453	1	0.248	1.51697e-28
HBG1	1.01798e-31	0.312393	0.394	0	2.03596e-28
DDAH1	1.14454e-31	0.646629	0.789	0.136	2.28908e-28
RANBP2	2.8878e-31	-0.357405	0.986	0.227	5.7756e-28
ADGRL3	3.53122e-31	0.823155	1	0.309	7.06244e-28
ADAMTS18	1.16594e-30	-0.417585	1	0.226	2.33187e-27
NSMF	6.56087e-30	0.253132	0.268	0.06	1.31217e-26
INA	7.52212e-30	0.399377	0.31	0.068	1.50442e-26
VIM	2.57978e-29	0.274767	0.296	0.07	5.15956e-26
SFMBT2	4.03157e-29	-0.413912	1	0.278	8.06314e-26
RARRES2	2.14559e-28	0.506222	0.38	0.013	4.29118e-25
PIP4K2A	2.56619e-28	-1.04061	1	0.953	5.13239e-25
TMEM65	3.44884e-28	-0.289929	0.915	0.197	6.89769e-25
LRP1B	4.87506e-28	1.04037	1	0.385	9.75013e-25
RORA	6.83063e-28	0.375521	1	0.289	1.36613e-24
MEG3	1.27068e-27	0.957055	0.761	0.091	2.54135e-24
PPP3CA	2.41286e-26	0.529106	1	0.28	4.82571e-23
RYR2	2.45493e-26	-0.314468	1	0.265	4.90987e-23
GRIA4	2.92145e-26	0.512848	1	0.312	5.84289e-23
LAMA4	4.7759e-26	0.505418	0.38	0.017	9.55179e-23
ATP1A2	3.46459e-25	0.525981	0.676	0.056	6.92918e-22
CRYAB	5.10627e-25	-1.12693	1	0.952	1.02125e-21
GNA13	1.54395e-24	0.292455	0.817	0.13	3.0879e-21
GLTSCR1L	1.5874e-24	-0.305408	1	0.285	3.17479e-21
COL9A1	1.79599e-24	0.811561	0.704	0.029	3.59198e-21
PWRN1	5.29481e-24	-0.584504	1	0.259	1.05896e-20
TMCC2	3.34002e-22	-0.394418	1	0.263	6.68003e-19
CNTN1	5.15292e-22	0.540396	0.817	0.214	1.03058e-18
HAPLN1	6.28442e-22	0.462763	0.408	0.003	1.25688e-18
C1QTNF4	1.068e-21	0.511897	0.296	0.107	2.136e-18
CHRM5	1.34523e-21	-0.503123	1	0.275	2.69045e-18
PLP1	1.40908e-21	0.763509	1	0.981	2.81816e-18
TRIM37	1.91306e-21	0.366343	0.282	0.068	3.82612e-18
CYB5D2	1.59856e-20	0.311402	0.296	0.079	3.19712e-17
GPC6	1.67895e-20	0.359166	0.324	0.052	3.35791e-17
RFWD2	3.64268e-20	-0.421527	1	0.294	7.28535e-17
RIT2	2.28477e-19	0.318283	0.338	0.014	4.56954e-16
CA10	3.01003e-19	0.743122	0.704	0.103	6.02006e-16
SCRG1	8.71967e-19	0.605992	0.944	0.343	1.74393e-15
MAN2B1	1.10164e-18	0.337891	0.31	0.037	2.20327e-15
MACROD2	1.16664e-18	-0.422846	1	0.349	2.33327e-15
HOPX	1.21835e-18	0.308133	0.352	0.071	2.4367e-15
REEP1	4.10154e-18	0.276541	0.338	0.06	8.20309e-15
MAN2A1	4.33041e-18	-1.27634	1	0.871	8.66082e-15
NFAT5	2.0776e-17	-0.397851	1	0.313	4.1552e-14
KCTD1	3.10945e-17	-0.251445	0.761	0.101	6.2189e-14
IGF1R	1.74593e-16	-0.397625	0.972	0.329	3.49187e-13
ASAH1	2.49065e-16	0.312436	0.775	0.13	4.98131e-13
KAZN	3.34122e-16	0.279467	1	0.336	6.68244e-13
ARC	1.02293e-15	0.496101	0.423	0.005	2.04585e-12
NCALD	2.99736e-15	0.585864	0.704	0.131	5.99472e-12
SPP1	5.10266e-15	-1.12674	1	0.844	1.02053e-11
OTUD7B	6.36615e-15	-0.717016	1	0.322	1.27323e-11
NOL4	1.41781e-14	0.279925	0.662	0.076	2.83562e-11
RBFOX1	2.46168e-14	-0.746942	1	0.355	4.92336e-11
KLF6	5.75323e-14	0.429225	0.338	0.055	1.15065e-10
FAM196A	6.8288e-14	-0.331716	0.366	0.199	1.36576e-10
ZBED8	7.3193e-14	0.377786	0.324	0.063	1.46386e-10
DTNA	7.33636e-14	-0.279612	1	0.383	1.46727e-10
TTC9B	7.36313e-14	0.391541	0.352	0.111	1.47263e-10
GABRB3	7.73176e-14	0.28428	0.676	0.11	1.54635e-10
MBP	7.91969e-14	0.534758	1	0.948	1.58394e-10
TRPS1	1.13611e-13	-0.582909	1	0.37	2.27222e-10
NEAT1	1.83668e-13	-0.99401	1	0.858	3.67336e-10
TMEM151A	2.34017e-13	-0.527778	1	0.339	4.68035e-10
CYTH1	6.19416e-13	-0.546128	1	0.325	1.23883e-09
SYTL2	2.17792e-12	-0.284808	0.789	0.205	4.35584e-09
TUBB4B	3.22818e-12	0.384316	0.746	0.168	6.45637e-09
LSAMP	4.25151e-12	0.618296	1	0.609	8.50301e-09
OLIG2	1.54769e-11	0.620308	0.789	0.203	3.09538e-08
TF	7.85656e-11	-0.397726	1	0.818	1.57131e-07
UTY	8.5139e-11	-0.576062	1	0.347	1.70278e-07
IQCJ.SCHIP1	9.31818e-11	-0.682425	1	0.338	1.86364e-07
PFKFB3	1.01579e-10	-0.277248	0.732	0.147	2.03158e-07
LIMCH1	1.26001e-10	-0.480698	1	0.765	2.52002e-07
CDKN1C	1.53444e-10	-0.558487	1	0.325	3.06888e-07
HBG2	1.80102e-10	0.614315	0.437	0.001	3.60204e-07
CST3	2.68636e-10	1.37958	0.704	0.22	5.37271e-07
MIAT	3.764e-10	0.385392	0.394	0.074	7.528e-07
SPRY1	5.9347e-10	0.517098	0.423	0.003	1.18694e-06
FAM110B	6.15024e-10	0.635954	0.62	0.07	1.23005e-06
RAMP1	7.80279e-10	0.750415	0.69	0.191	1.56056e-06
MT2A	8.00994e-10	0.342802	1	0.48	1.60199e-06
MEIS2	1.82904e-09	-0.558279	0.972	0.352	3.65808e-06
NEFM	2.38966e-09	0.373769	0.366	0.061	4.77932e-06
DBI	3.20023e-09	0.269199	0.915	0.381	6.40045e-06
GRID2	3.23992e-09	0.250901	1	0.486	6.47984e-06
ZZEF1	3.24547e-09	-0.320516	0.352	0.132	6.49094e-06
PDK4	4.26412e-09	-0.684909	1	0.345	8.52825e-06
ENPP2	4.34814e-09	-0.5206	1	0.782	8.69627e-06
OLIG1	6.19183e-09	0.757961	0.93	0.447	1.23837e-05
FRYL	6.35954e-09	-0.34561	1	0.818	1.27191e-05
ARPP21	1.05965e-08	0.736891	0.662	0.1	2.1193e-05
HBA1	1.43531e-08	0.268758	0.408	0.061	2.87062e-05
HAX1	1.45316e-08	0.563404	0.38	0.129	2.90632e-05
SPOCK1	2.08998e-08	-0.56901	1	0.835	4.17997e-05
KLK6	2.28939e-08	-0.320385	1	0.366	4.57877e-05
TPPP3	4.25228e-08	-0.460908	1	0.393	8.50456e-05
CA2	4.78092e-08	-0.585495	1	0.393	9.56185e-05
MYLK	1.07279e-07	-0.709117	1	0.405	0.000214557
KXD1	1.20892e-07	0.611325	0.38	0.137	0.000241784
SYNE2	1.87349e-07	0.302692	0.394	0.111	0.000374699
RAB30	2.22313e-07	-0.599175	1	0.417	0.000444626
AK9	4.8733e-07	-0.303338	0.732	0.183	0.000974661
IER2	9.55448e-07	0.679833	0.394	0.043	0.0019109
ADARB2	1.00786e-06	-0.390568	1	0.383	0.00201573
ZFYVE16	1.29704e-06	-0.332246	1	0.447	0.00259409
B2M	2.07667e-06	0.285449	0.803	0.283	0.00415333
ROBO1	3.23275e-06	-0.495164	1	0.445	0.00646551
NLK	5.68284e-06	-0.884466	1	0.428	0.0113657
SPTBN1	5.69001e-06	-0.458974	1	0.412	0.01138
COL6A1	6.82515e-06	0.322153	0.408	0.047	0.0136503
CNTNAP2	7.88087e-06	-0.775885	1	0.433	0.0157617
MIR181A1HG	1.45976e-05	-0.616512	1	0.443	0.0291952
RGS2	2.45744e-05	0.259511	0.408	0.028	0.0491488
MT3	5.45581e-05	0.65623	1	0.628	0.109116
DDX18	7.25804e-05	-0.393238	0.479	0.277	0.145161
PCSK1N	7.54546e-05	0.341226	0.676	0.231	0.150909
TUSC3	9.48547e-05	0.308703	0.437	0.018	0.189709
POU2F2	9.57514e-05	0.250614	0.577	0.068	0.191503
PID1	0.000185565	0.46253	0.437	0.097	0.37113
MALAT1	0.000204183	0.302761	0.577	0.066	0.408366
EGR1	0.000211339	0.3533	0.437	0.012	0.422677
VDAC1	0.000223868	0.70276	0.634	0.165	0.447737
RNF144A	0.00025133	-0.707876	0.563	0.384	0.502661
NCS1	0.000290953	0.28823	0.437	0.124	0.581906
CD9	0.000298455	0.413769	1	0.539	0.596909
NTNG1	0.000406886	0.440358	0.437	0.106	0.813771
ATP1B1	0.000445635	-0.668384	1	0.718	0.891271
LRRN3	0.000542061	0.459946	0.563	0.036	1
TENM3	0.00071596	-0.254954	0.394	0.077	1
ATP1B2	0.000734679	0.276795	0.592	0.103	1
KPNA2	0.000853556	0.25775	0.437	0.079	1
HSPB1	0.0017166	0.279165	0.451	0.139	1
HBA2	0.00183682	0.498238	0.451	0.075	1
SGK1	0.00206904	-0.582899	1	0.704	1
NEFL	0.00219293	0.286995	0.451	0.128	1
SOX11	0.00278047	0.547047	0.535	0.011	1
GNG3	0.00377798	0.381618	0.451	0.104	1
ZNF708	0.00437862	-0.770803	1	0.452	1
IQGAP1	0.00571448	-0.955788	1	0.47	1
C9orf135	0.00602815	0.279866	0.549	0.028	1
CTNNAL1	0.00679061	0.316095	0.563	0.076	1
DMD	0.00753339	-0.308277	1	0.516	1
MAPK8IP1	0.00774313	-0.587372	0.549	0.287	1
DZIP1	0.00833273	0.318334	0.465	0.062	1
ASCL1	0.0103756	0.771714	0.465	0.063	1
RNF152	0.0104086	-0.272485	0.479	0.15	1
KCNIP1	0.0107315	0.29782	0.465	0.049	1
MAP1B	0.0131587	-0.583969	0.817	0.586	1
LMO3	0.0132609	0.288779	0.465	0.098	1
SAT1	0.0182761	0.312395	0.465	0.12	1
LOH12CR2	0.0193036	0.394775	0.451	0.048	1
ALDOA	0.0214799	-0.311192	0.831	0.41	1
APOD	0.0316901	0.345603	1	0.893	1
DPYSL3	0.0369593	0.284792	0.465	0.1	1
SATB1	0.0379628	0.269221	0.577	0.082	1
LGALS1	0.0475252	-0.608383	0.718	0.298	1
SALL1	0.0484772	-0.383933	0.507	0.179	1
PPP1R14A	0.0522124	-0.356952	1	0.647	1
BCAS1	0.0551631	0.270023	0.958	0.527	1
MIR219A2	0.0566634	-0.903559	1	0.588	1
RNASE1	0.06266	-0.399238	1	0.594	1
MYT1L	0.0652064	0.516826	0.549	0.091	1
KLHL32	0.0654239	-0.913805	1	0.629	1
TAGLN3	0.0680982	0.342319	0.479	0.122	1
ID2	0.0743791	0.521094	0.465	0.039	1
DLL3	0.100881	0.794097	0.479	0.038	1
FZD3	0.126818	0.262376	0.535	0.035	1
EXOC6B	0.127675	-0.672298	1	0.643	1
FOS	0.138459	0.612435	0.549	0.049	1
PLAT	0.147877	0.769634	0.479	0.054	1
LY6H	0.171198	0.341717	0.549	0.136	1
GPR17	0.191637	0.891978	0.535	0.1	1
SOX9	0.193524	0.268982	0.479	0.047	1
UBC	0.251747	-0.541034	0.859	0.545	1
PLS3	0.256847	-0.446081	0.521	0.162	1
VEZT	0.327234	-0.262561	0.577	0.253	1
MEF2C	0.335458	0.660036	0.535	0.102	1
S100B	0.338818	0.260748	0.958	0.769	1
RHOC	0.340607	0.398469	0.493	0.127	1
GAP43	0.344526	0.663421	0.535	0.111	1
COL20A1	0.346453	0.549585	0.493	0.02	1
RDH11	0.409077	0.939995	0.479	0.048	1
CD59	0.456772	0.419422	0.493	0.063	1
STMN2	0.485628	0.361956	0.535	0.155	1
BEX1	0.496709	-0.33991	0.577	0.128	1
ST8SIA1	0.505069	0.357421	0.521	0.048	1
SCG3	0.516302	0.302899	0.521	0.064	1
TIMP1	0.525632	0.986934	0.521	0.101	1
CDK19	0.571349	-0.782022	1	0.601	1
SOX2	0.572585	0.345074	0.535	0.16	1
CRIP2	0.810605	0.57025	0.507	0.129	1
HTRA1	0.929946	-0.469993	1	0.595	1
RBP1	0.931461	0.26478	0.549	0.181	1
