# Supplementary material for: Single-cell profiling of human subventricular zone progenitors identifies SFRP1 as a target to re-activate progenitors
Source: Nat Commun. 2022 Feb 24;13:1036. doi: 10.1038/s41467-022-28626-9 (PMC8873234; doi:10.1038/s41467-022-28626-9)
Supplement: Supplementary file 6 — Supplementary Data 4 [file 41467_2022_28626_MOESM6_ESM.xlsx]

## Sheet: All genes
row.names	gene_short_name	num_cells_expressed	gene_id	status	term	estimate	std_err	test_val	p_value	normalized_effect	model_component	q_value
46	A2ML1-AS1	0	A2ML1-AS1	FAIL	(Intercept)	-27.3	0.0503386	-542.379	0	0	count	0
358	AC004039.1	1	AC004039.1	FAIL	(Intercept)	-27.3	0.0503386	-542.379	0	0	count	0
433	AC004805.1	1	AC004805.1	FAIL	(Intercept)	-27.3	0.0503386	-542.379	0	0	count	0
646	AC005821.1	3	AC005821.1	FAIL	(Intercept)	-27.3	0.0503386	-542.379	0	0	count	0
781	AC006547.2	2	AC006547.2	FAIL	(Intercept)	-27.3	0.0503386	-542.379	0	0	count	0
1735	AC015802.6	0	AC015802.6	FAIL	(Intercept)	-27.3	0.0503386	-542.379	0	0	count	0
2302	AC026704.1	0	AC026704.1	FAIL	(Intercept)	-27.3	0.0503386	-542.379	0	0	count	0
2575	AC068631.1	1	AC068631.1	FAIL	(Intercept)	-27.3	0.0503386	-542.379	0	0	count	0
2791	AC078923.1	1	AC078923.1	FAIL	(Intercept)	-27.3	0.0503386	-542.379	0	0	count	0
3433	AC096631.1	1	AC096631.1	FAIL	(Intercept)	-27.3	0.0503386	-542.379	0	0	count	0
3460	AC097375.4	0	AC097375.4	FAIL	(Intercept)	-27.3	0.0503386	-542.379	0	0	count	0
5374	AKR1C6P	1	AKR1C6P	FAIL	(Intercept)	-27.3	0.0503386	-542.379	0	0	count	0
5746	AL121721.1	0	AL121721.1	FAIL	(Intercept)	-27.3	0.0503386	-542.379	0	0	count	0
5929	AL138686.1	1	AL138686.1	FAIL	(Intercept)	-27.3	0.0503386	-542.379	0	0	count	0
6043	AL157778.1	0	AL157778.1	FAIL	(Intercept)	-27.3	0.0503386	-542.379	0	0	count	0
6082	AL158196.1	2	AL158196.1	FAIL	(Intercept)	-27.3	0.0503386	-542.379	0	0	count	0
6091	AL158212.2	0	AL158212.2	FAIL	(Intercept)	-27.3	0.0503386	-542.379	0	0	count	0
6358	AL357093.1	0	AL357093.1	FAIL	(Intercept)	-27.3	0.0503386	-542.379	0	0	count	0
6601	AL442647.1	0	AL442647.1	FAIL	(Intercept)	-27.3	0.0503386	-542.379	0	0	count	0
6652	AL512328.1	382	AL512328.1	OK	(Intercept)	1.16631	0.0071129	163.971	0	0	count	0
6757	AL590560.1	0	AL590560.1	FAIL	(Intercept)	-27.3	0.0503386	-542.379	0	0	count	0
6928	AL807752.7	356	AL807752.7	OK	(Intercept)	1.01229	0.0118063	85.7418	0	0	count	0
7948	APLP1	2898	APLP1	OK	(Intercept)	1.16631	0.0264085	44.1641	0	0	count	0
9241	BARX2	0	BARX2	FAIL	(Intercept)	-27.3	0.0503386	-542.379	0	0	count	0
12025	CFAP157	0	CFAP157	FAIL	(Intercept)	-27.3	0.0503386	-542.379	0	0	count	0
12052	CFAP45	0	CFAP45	FAIL	(Intercept)	-27.3	0.0503386	-542.379	0	0	count	0
12508	CLIC6	0	CLIC6	FAIL	(Intercept)	-27.3	0.0503386	-542.379	0	0	count	0
12748	CNP	2817	CNP	OK	(Intercept)	1.16394	0.0253632	45.8909	0	0	count	0
13453	CRYAB	3042	CRYAB	OK	(Intercept)	1.32966	0.0200559	66.2976	0	0	count	0
14752	DNAAF1	3	DNAAF1	FAIL	(Intercept)	-27.3	0.0503386	-542.379	0	0	count	0
15172	DRC1	1	DRC1	FAIL	(Intercept)	-27.3	0.0503386	-542.379	0	0	count	0
15607	EFCAB1	1	EFCAB1	FAIL	(Intercept)	-27.3	0.0503386	-542.379	0	0	count	0
16975	FAM216B	0	FAM216B	FAIL	(Intercept)	-27.3	0.0503386	-542.379	0	0	count	0
17125	FAM92B	0	FAM92B	FAIL	(Intercept)	-27.3	0.0503386	-542.379	0	0	count	0
17713	FNDC1	2	FNDC1	FAIL	(Intercept)	-27.3	0.0503386	-542.379	0	0	count	0
17950	FTH1	2772	FTH1	OK	(Intercept)	1.18506	0.0270396	43.8269	0	0	count	0
19024	GPM6B	2776	GPM6B	OK	(Intercept)	1.24441	0.025381	49.0292	0	0	count	0
20860	IL1RAPL1	3104	IL1RAPL1	OK	(Intercept)	1.09861	0.0221568	49.5835	0	0	count	0
22918	LINC00879	0	LINC00879	FAIL	(Intercept)	-27.3	0.0503386	-542.379	0	0	count	0
23128	LINC01515	1	LINC01515	FAIL	(Intercept)	-27.3	0.0503386	-542.379	0	0	count	0
23185	LINC01643	0	LINC01643	FAIL	(Intercept)	-27.3	0.0503386	-542.379	0	0	count	0
23194	LINC01720	1	LINC01720	FAIL	(Intercept)	-27.3	0.0503386	-542.379	0	0	count	0
23206	LINC01807	0	LINC01807	FAIL	(Intercept)	-27.3	0.0503386	-542.379	0	0	count	0
23341	LINC02296	1	LINC02296	FAIL	(Intercept)	-27.3	0.0503386	-542.379	0	0	count	0
23407	LINC02492	1	LINC02492	FAIL	(Intercept)	-27.3	0.0503386	-542.379	0	0	count	0
24169	MALAT1	459	MALAT1	OK	(Intercept)	1.31685	0.0095325	138.143	0	0	count	0
24388	MAPK15	3	MAPK15	FAIL	(Intercept)	-27.3	0.0503386	-542.379	0	0	count	0
24595	MBP	3057	MBP	OK	(Intercept)	1.28654	0.0240148	53.5729	0	0	count	0
25588	MORN3	1	MORN3	FAIL	(Intercept)	-27.3	0.0503386	-542.379	0	0	count	0
26095	MT-ATP6	391	MT-ATP6	OK	(Intercept)	1.33434	0.0092571	144.142	0	0	count	0
26098	MTATP6P1	377	MTATP6P1	OK	(Intercept)	1.03143	0.0094337	109.334	0	0	count	0
26125	MT-CO1	374	MT-CO1	OK	(Intercept)	1.11701	0.011587	96.4016	0	0	count	0
26155	MT-CO2	379	MT-CO2	OK	(Intercept)	1.14075	0.0093323	122.237	0	0	count	0
26164	MT-CO3	378	MT-CO3	OK	(Intercept)	1.07729	0.0092933	115.921	0	0	count	0
26179	MT-CYB	389	MT-CYB	OK	(Intercept)	1.26248	0.0097272	129.789	0	0	count	0
26296	MT-ND1	389	MT-ND1	OK	(Intercept)	1.2065	0.0099036	121.825	0	0	count	0
26305	MT-ND2	388	MT-ND2	OK	(Intercept)	1.19584	0.0097476	122.68	0	0	count	0
26311	MT-ND3	393	MT-ND3	OK	(Intercept)	1.33633	0.0096258	138.829	0	0	count	0
26320	MT-ND4	394	MT-ND4	OK	(Intercept)	1.48103	0.009192	161.122	0	0	count	0
26335	MT-ND5	348	MT-ND5	OK	(Intercept)	0.851989	0.0125961	67.6391	0	0	count	0
26371	MT-RNR1	362	MT-RNR1	OK	(Intercept)	0.96809	0.0107805	89.7997	0	0	count	0
26374	MT-RNR2	394	MT-RNR2	OK	(Intercept)	1.45301	0.0095567	152.041	0	0	count	0
26413	MT-TH	357	MT-TH	OK	(Intercept)	0.863797	0.0116058	74.4283	0	0	count	0
26425	MT-TL2	0	MT-TL2	FAIL	(Intercept)	-27.3	0.0503386	-542.379	0	0	count	0
29134	PCDH9	3211	PCDH9	OK	(Intercept)	1.17729	0.0193923	60.7093	0	0	count	0
30487	PLP1	3153	PLP1	OK	(Intercept)	1.60028	0.0202986	78.8372	0	0	count	0
31633	PRR29	1	PRR29	FAIL	(Intercept)	-27.3	0.0503386	-542.379	0	0	count	0
31945	PTGDS	3053	PTGDS	OK	(Intercept)	1.11784	0.0256013	43.6633	0	0	count	0
32257	QKI	3101	QKI	OK	(Intercept)	1.09523	0.0224239	48.842	0	0	count	0
33874	ROPN1L	1	ROPN1L	FAIL	(Intercept)	-27.3	0.0503386	-542.379	0	0	count	0
35422	SELENOP	343	SELENOP	OK	(Intercept)	0.709469	0.0115046	61.6685	0	0	count	0
37489	SOX2-OT	411	SOX2-OT	OK	(Intercept)	0.836754	0.0149605	55.9309	0	0	count	0
40549	TOGARAM2	0	TOGARAM2	FAIL	(Intercept)	-27.3	0.0503386	-542.379	0	0	count	0
42736	VWA5B1	0	VWA5B1	FAIL	(Intercept)	-27.3	0.0503386	-542.379	0	0	count	0
43147	XIST	356	XIST	OK	(Intercept)	0.572195	0.0131756	43.4282	0	0	count	0
43360	YWHAEP7	2	YWHAEP7	FAIL	(Intercept)	-27.3	0.0503386	-542.379	0	0	count	0
45466	SEPTIN14	0	SEPTIN14	FAIL	(Intercept)	-27.3	0.0503386	-542.379	0	0	count	0
45475	AADAC	0	AADAC	FAIL	(Intercept)	-27.3	0.0503386	-542.379	0	0	count	0
45478	AADACL2	0	AADACL2	FAIL	(Intercept)	-27.3	0.0503386	-542.379	0	0	count	0
45481	AADACL2-AS1	0	AADACL2-AS1	FAIL	(Intercept)	-27.3	0.0503386	-542.379	0	0	count	0
45493	ABCA4	0	ABCA4	FAIL	(Intercept)	-27.3	0.0503386	-542.379	0	0	count	0
45505	ABCB4	5	ABCB4	FAIL	(Intercept)	-27.3	0.0503386	-542.379	0	0	count	0
45535	ABCG8	0	ABCG8	FAIL	(Intercept)	-27.3	0.0503386	-542.379	0	0	count	0
45547	ABHD17AP6	0	ABHD17AP6	FAIL	(Intercept)	-27.3	0.0503386	-542.379	0	0	count	0
45559	AC000058.1	0	AC000058.1	FAIL	(Intercept)	-27.3	0.0503386	-542.379	0	0	count	0
45562	AC000068.3	0	AC000068.3	FAIL	(Intercept)	-27.3	0.0503386	-542.379	0	0	count	0
45565	AC000099.1	0	AC000099.1	FAIL	(Intercept)	-27.3	0.0503386	-542.379	0	0	count	0
45568	AC000372.1	0	AC000372.1	FAIL	(Intercept)	-27.3	0.0503386	-542.379	0	0	count	0
45571	AC002044.2	0	AC002044.2	FAIL	(Intercept)	-27.3	0.0503386	-542.379	0	0	count	0
45580	AC002072.1	0	AC002072.1	FAIL	(Intercept)	-27.3	0.0503386	-542.379	0	0	count	0
45583	AC002074.1	0	AC002074.1	FAIL	(Intercept)	-27.3	0.0503386	-542.379	0	0	count	0
45586	AC002074.2	0	AC002074.2	FAIL	(Intercept)	-27.3	0.0503386	-542.379	0	0	count	0
45589	AC002075.2	0	AC002075.2	FAIL	(Intercept)	-27.3	0.0503386	-542.379	0	0	count	0
45592	AC002091.1	0	AC002091.1	FAIL	(Intercept)	-27.3	0.0503386	-542.379	0	0	count	0
45595	AC002127.2	0	AC002127.2	FAIL	(Intercept)	-27.3	0.0503386	-542.379	0	0	count	0
45598	AC002377.1	0	AC002377.1	FAIL	(Intercept)	-27.3	0.0503386	-542.379	0	0	count	0
45601	AC002383.1	0	AC002383.1	FAIL	(Intercept)	-27.3	0.0503386	-542.379	0	0	count	0
45604	AC002428.1	0	AC002428.1	FAIL	(Intercept)	-27.3	0.0503386	-542.379	0	0	count	0
45607	AC002454.1	0	AC002454.1	FAIL	(Intercept)	-27.3	0.0503386	-542.379	0	0	count	0
45610	AC002465.1	0	AC002465.1	FAIL	(Intercept)	-27.3	0.0503386	-542.379	0	0	count	0
45619	AC003666.1	0	AC003666.1	FAIL	(Intercept)	-27.3	0.0503386	-542.379	0	0	count	0
45625	AC003958.2	0	AC003958.2	FAIL	(Intercept)	-27.3	0.0503386	-542.379	0	0	count	0
45628	AC003988.1	0	AC003988.1	FAIL	(Intercept)	-27.3	0.0503386	-542.379	0	0	count	0
45631	AC003989.1	0	AC003989.1	FAIL	(Intercept)	-27.3	0.0503386	-542.379	0	0	count	0
45634	AC003991.1	0	AC003991.1	FAIL	(Intercept)	-27.3	0.0503386	-542.379	0	0	count	0
45637	AC004009.1	0	AC004009.1	FAIL	(Intercept)	-27.3	0.0503386	-542.379	0	0	count	0
45649	AC004160.1	0	AC004160.1	FAIL	(Intercept)	-27.3	0.0503386	-542.379	0	0	count	0
45652	AC004241.1	0	AC004241.1	FAIL	(Intercept)	-27.3	0.0503386	-542.379	0	0	count	0
45655	AC004253.1	0	AC004253.1	FAIL	(Intercept)	-27.3	0.0503386	-542.379	0	0	count	0
45658	AC004448.2	0	AC004448.2	FAIL	(Intercept)	-27.3	0.0503386	-542.379	0	0	count	0
45661	AC004540.1	0	AC004540.1	FAIL	(Intercept)	-27.3	0.0503386	-542.379	0	0	count	0
45664	AC004554.2	0	AC004554.2	FAIL	(Intercept)	-27.3	0.0503386	-542.379	0	0	count	0
45673	AC004687.1	0	AC004687.1	FAIL	(Intercept)	-27.3	0.0503386	-542.379	0	0	count	0
45679	AC004825.2	0	AC004825.2	FAIL	(Intercept)	-27.3	0.0503386	-542.379	0	0	count	0
45682	AC004828.1	0	AC004828.1	FAIL	(Intercept)	-27.3	0.0503386	-542.379	0	0	count	0
45688	AC004832.1	0	AC004832.1	FAIL	(Intercept)	-27.3	0.0503386	-542.379	0	0	count	0
45694	AC004865.2	0	AC004865.2	FAIL	(Intercept)	-27.3	0.0503386	-542.379	0	0	count	0
45697	AC004870.2	0	AC004870.2	FAIL	(Intercept)	-27.3	0.0503386	-542.379	0	0	count	0
45700	AC004870.3	0	AC004870.3	FAIL	(Intercept)	-27.3	0.0503386	-542.379	0	0	count	0
45703	AC004870.4	0	AC004870.4	FAIL	(Intercept)	-27.3	0.0503386	-542.379	0	0	count	0
45706	AC004875.1	0	AC004875.1	FAIL	(Intercept)	-27.3	0.0503386	-542.379	0	0	count	0
45709	AC004884.1	0	AC004884.1	FAIL	(Intercept)	-27.3	0.0503386	-542.379	0	0	count	0
45712	AC004889.1	0	AC004889.1	FAIL	(Intercept)	-27.3	0.0503386	-542.379	0	0	count	0
45715	AC004890.3	0	AC004890.3	FAIL	(Intercept)	-27.3	0.0503386	-542.379	0	0	count	0
45721	AC004910.1	0	AC004910.1	FAIL	(Intercept)	-27.3	0.0503386	-542.379	0	0	count	0
45724	AC004936.1	0	AC004936.1	FAIL	(Intercept)	-27.3	0.0503386	-542.379	0	0	count	0
45733	AC005008.2	0	AC005008.2	FAIL	(Intercept)	-27.3	0.0503386	-542.379	0	0	count	0
45742	AC005042.2	0	AC005042.2	FAIL	(Intercept)	-27.3	0.0503386	-542.379	0	0	count	0
45745	AC005062.1	0	AC005062.1	FAIL	(Intercept)	-27.3	0.0503386	-542.379	0	0	count	0
45748	AC005064.1	0	AC005064.1	FAIL	(Intercept)	-27.3	0.0503386	-542.379	0	0	count	0
45751	AC005082.1	0	AC005082.1	FAIL	(Intercept)	-27.3	0.0503386	-542.379	0	0	count	0
45754	AC005082.2	0	AC005082.2	FAIL	(Intercept)	-27.3	0.0503386	-542.379	0	0	count	0
45760	AC005100.1	0	AC005100.1	FAIL	(Intercept)	-27.3	0.0503386	-542.379	0	0	count	0
45763	AC005154.4	0	AC005154.4	FAIL	(Intercept)	-27.3	0.0503386	-542.379	0	0	count	0
45769	AC005165.1	0	AC005165.1	FAIL	(Intercept)	-27.3	0.0503386	-542.379	0	0	count	0
45775	AC005280.2	0	AC005280.2	FAIL	(Intercept)	-27.3	0.0503386	-542.379	0	0	count	0
45778	AC005304.3	0	AC005304.3	FAIL	(Intercept)	-27.3	0.0503386	-542.379	0	0	count	0
45781	AC005323.1	0	AC005323.1	FAIL	(Intercept)	-27.3	0.0503386	-542.379	0	0	count	0
45784	AC005323.2	0	AC005323.2	FAIL	(Intercept)	-27.3	0.0503386	-542.379	0	0	count	0
45787	AC005355.1	0	AC005355.1	FAIL	(Intercept)	-27.3	0.0503386	-542.379	0	0	count	0
45790	AC005357.2	0	AC005357.2	FAIL	(Intercept)	-27.3	0.0503386	-542.379	0	0	count	0
45793	AC005358.1	0	AC005358.1	FAIL	(Intercept)	-27.3	0.0503386	-542.379	0	0	count	0
45796	AC005381.1	0	AC005381.1	FAIL	(Intercept)	-27.3	0.0503386	-542.379	0	0	count	0
45799	AC005394.1	0	AC005394.1	FAIL	(Intercept)	-27.3	0.0503386	-542.379	0	0	count	0
45802	AC005394.2	0	AC005394.2	FAIL	(Intercept)	-27.3	0.0503386	-542.379	0	0	count	0
45805	AC005479.2	0	AC005479.2	FAIL	(Intercept)	-27.3	0.0503386	-542.379	0	0	count	0
45808	AC005537.1	0	AC005537.1	FAIL	(Intercept)	-27.3	0.0503386	-542.379	0	0	count	0
45814	AC005580.1	0	AC005580.1	FAIL	(Intercept)	-27.3	0.0503386	-542.379	0	0	count	0
45817	AC005609.5	0	AC005609.5	FAIL	(Intercept)	-27.3	0.0503386	-542.379	0	0	count	0
45823	AC005695.2	0	AC005695.2	FAIL	(Intercept)	-27.3	0.0503386	-542.379	0	0	count	0
45829	AC005772.1	0	AC005772.1	FAIL	(Intercept)	-27.3	0.0503386	-542.379	0	0	count	0
45832	AC005828.1	0	AC005828.1	FAIL	(Intercept)	-27.3	0.0503386	-542.379	0	0	count	0
45835	AC005828.3	0	AC005828.3	FAIL	(Intercept)	-27.3	0.0503386	-542.379	0	0	count	0
45838	AC005842.1	0	AC005842.1	FAIL	(Intercept)	-27.3	0.0503386	-542.379	0	0	count	0
45841	AC005871.2	0	AC005871.2	FAIL	(Intercept)	-27.3	0.0503386	-542.379	0	0	count	0
45844	AC005884.1	0	AC005884.1	FAIL	(Intercept)	-27.3	0.0503386	-542.379	0	0	count	0
45850	AC005909.1	0	AC005909.1	FAIL	(Intercept)	-27.3	0.0503386	-542.379	0	0	count	0
45856	AC005993.1	0	AC005993.1	FAIL	(Intercept)	-27.3	0.0503386	-542.379	0	0	count	0
45859	AC005999.2	0	AC005999.2	FAIL	(Intercept)	-27.3	0.0503386	-542.379	0	0	count	0
45862	AC006004.1	0	AC006004.1	FAIL	(Intercept)	-27.3	0.0503386	-542.379	0	0	count	0
45865	AC006013.1	0	AC006013.1	FAIL	(Intercept)	-27.3	0.0503386	-542.379	0	0	count	0
45871	AC006065.3	0	AC006065.3	FAIL	(Intercept)	-27.3	0.0503386	-542.379	0	0	count	0
45874	AC006065.4	0	AC006065.4	FAIL	(Intercept)	-27.3	0.0503386	-542.379	0	0	count	0
45877	AC006077.1	0	AC006077.1	FAIL	(Intercept)	-27.3	0.0503386	-542.379	0	0	count	0
45883	AC006153.1	0	AC006153.1	FAIL	(Intercept)	-27.3	0.0503386	-542.379	0	0	count	0
45892	AC006296.2	0	AC006296.2	FAIL	(Intercept)	-27.3	0.0503386	-542.379	0	0	count	0
45895	AC006299.1	0	AC006299.1	FAIL	(Intercept)	-27.3	0.0503386	-542.379	0	0	count	0
45901	AC006372.3	0	AC006372.3	FAIL	(Intercept)	-27.3	0.0503386	-542.379	0	0	count	0
45904	AC006378.1	0	AC006378.1	FAIL	(Intercept)	-27.3	0.0503386	-542.379	0	0	count	0
45910	AC006449.6	0	AC006449.6	FAIL	(Intercept)	-27.3	0.0503386	-542.379	0	0	count	0
45916	AC006566.1	0	AC006566.1	FAIL	(Intercept)	-27.3	0.0503386	-542.379	0	0	count	0
45919	AC006581.1	0	AC006581.1	FAIL	(Intercept)	-27.3	0.0503386	-542.379	0	0	count	0
45922	AC006581.2	0	AC006581.2	FAIL	(Intercept)	-27.3	0.0503386	-542.379	0	0	count	0
45925	AC006970.2	0	AC006970.2	FAIL	(Intercept)	-27.3	0.0503386	-542.379	0	0	count	0
45928	AC006972.1	0	AC006972.1	FAIL	(Intercept)	-27.3	0.0503386	-542.379	0	0	count	0
45931	AC007001.1	0	AC007001.1	FAIL	(Intercept)	-27.3	0.0503386	-542.379	0	0	count	0
45937	AC007114.1	0	AC007114.1	FAIL	(Intercept)	-27.3	0.0503386	-542.379	0	0	count	0
45940	AC007128.1	0	AC007128.1	FAIL	(Intercept)	-27.3	0.0503386	-542.379	0	0	count	0
45943	AC007161.1	0	AC007161.1	FAIL	(Intercept)	-27.3	0.0503386	-542.379	0	0	count	0
45946	AC007163.1	0	AC007163.1	FAIL	(Intercept)	-27.3	0.0503386	-542.379	0	0	count	0
45952	AC007277.1	0	AC007277.1	FAIL	(Intercept)	-27.3	0.0503386	-542.379	0	0	count	0
45958	AC007298.2	0	AC007298.2	FAIL	(Intercept)	-27.3	0.0503386	-542.379	0	0	count	0
45961	AC007333.2	0	AC007333.2	FAIL	(Intercept)	-27.3	0.0503386	-542.379	0	0	count	0
45964	AC007347.1	0	AC007347.1	FAIL	(Intercept)	-27.3	0.0503386	-542.379	0	0	count	0
45973	AC007383.1	0	AC007383.1	FAIL	(Intercept)	-27.3	0.0503386	-542.379	0	0	count	0
45976	AC007384.1	0	AC007384.1	FAIL	(Intercept)	-27.3	0.0503386	-542.379	0	0	count	0
45982	AC007422.2	0	AC007422.2	FAIL	(Intercept)	-27.3	0.0503386	-542.379	0	0	count	0
45985	AC007448.2	0	AC007448.2	FAIL	(Intercept)	-27.3	0.0503386	-542.379	0	0	count	0
45988	AC007448.4	0	AC007448.4	FAIL	(Intercept)	-27.3	0.0503386	-542.379	0	0	count	0
45991	AC007450.1	0	AC007450.1	FAIL	(Intercept)	-27.3	0.0503386	-542.379	0	0	count	0
45994	AC007463.1	0	AC007463.1	FAIL	(Intercept)	-27.3	0.0503386	-542.379	0	0	count	0
45997	AC007490.1	1	AC007490.1	FAIL	(Intercept)	-27.3	0.0503386	-542.379	0	0	count	0
46000	AC007491.1	0	AC007491.1	FAIL	(Intercept)	-27.3	0.0503386	-542.379	0	0	count	0
46003	AC007493.1	0	AC007493.1	FAIL	(Intercept)	-27.3	0.0503386	-542.379	0	0	count	0
46006	AC007529.2	0	AC007529.2	FAIL	(Intercept)	-27.3	0.0503386	-542.379	0	0	count	0
46009	AC007537.1	0	AC007537.1	FAIL	(Intercept)	-27.3	0.0503386	-542.379	0	0	count	0
46012	AC007563.2	0	AC007563.2	FAIL	(Intercept)	-27.3	0.0503386	-542.379	0	0	count	0
46021	AC007611.1	0	AC007611.1	FAIL	(Intercept)	-27.3	0.0503386	-542.379	0	0	count	0
46027	AC007631.1	1	AC007631.1	FAIL	(Intercept)	-27.3	0.0503386	-542.379	0	0	count	0
46033	AC007656.1	0	AC007656.1	FAIL	(Intercept)	-27.3	0.0503386	-542.379	0	0	count	0
46036	AC007686.4	0	AC007686.4	FAIL	(Intercept)	-27.3	0.0503386	-542.379	0	0	count	0
46039	AC007688.1	0	AC007688.1	FAIL	(Intercept)	-27.3	0.0503386	-542.379	0	0	count	0
46042	AC007728.2	0	AC007728.2	FAIL	(Intercept)	-27.3	0.0503386	-542.379	0	0	count	0
46048	AC007773.1	0	AC007773.1	FAIL	(Intercept)	-27.3	0.0503386	-542.379	0	0	count	0
46054	AC007849.1	0	AC007849.1	FAIL	(Intercept)	-27.3	0.0503386	-542.379	0	0	count	0
46060	AC007922.3	0	AC007922.3	FAIL	(Intercept)	-27.3	0.0503386	-542.379	0	0	count	0
46066	AC007950.3	0	AC007950.3	FAIL	(Intercept)	-27.3	0.0503386	-542.379	0	0	count	0
46069	AC007991.3	0	AC007991.3	FAIL	(Intercept)	-27.3	0.0503386	-542.379	0	0	count	0
46072	AC007998.3	0	AC007998.3	FAIL	(Intercept)	-27.3	0.0503386	-542.379	0	0	count	0
46075	AC008011.2	0	AC008011.2	FAIL	(Intercept)	-27.3	0.0503386	-542.379	0	0	count	0
46078	AC008060.3	0	AC008060.3	FAIL	(Intercept)	-27.3	0.0503386	-542.379	0	0	count	0
46084	AC008105.3	0	AC008105.3	FAIL	(Intercept)	-27.3	0.0503386	-542.379	0	0	count	0
46087	AC008109.1	0	AC008109.1	FAIL	(Intercept)	-27.3	0.0503386	-542.379	0	0	count	0
46090	AC008115.1	0	AC008115.1	FAIL	(Intercept)	-27.3	0.0503386	-542.379	0	0	count	0
46096	AC008163.1	0	AC008163.1	FAIL	(Intercept)	-27.3	0.0503386	-542.379	0	0	count	0
46099	AC008170.1	0	AC008170.1	FAIL	(Intercept)	-27.3	0.0503386	-542.379	0	0	count	0
46102	AC008250.1	0	AC008250.1	FAIL	(Intercept)	-27.3	0.0503386	-542.379	0	0	count	0
46105	AC008277.1	0	AC008277.1	FAIL	(Intercept)	-27.3	0.0503386	-542.379	0	0	count	0
46108	AC008397.2	0	AC008397.2	FAIL	(Intercept)	-27.3	0.0503386	-542.379	0	0	count	0
46114	AC008464.1	0	AC008464.1	FAIL	(Intercept)	-27.3	0.0503386	-542.379	0	0	count	0
46120	AC008522.1	0	AC008522.1	FAIL	(Intercept)	-27.3	0.0503386	-542.379	0	0	count	0
46126	AC008551.1	0	AC008551.1	FAIL	(Intercept)	-27.3	0.0503386	-542.379	0	0	count	0
46132	AC008574.1	0	AC008574.1	FAIL	(Intercept)	-27.3	0.0503386	-542.379	0	0	count	0
46135	AC008588.1	0	AC008588.1	FAIL	(Intercept)	-27.3	0.0503386	-542.379	0	0	count	0
46144	AC008662.1	0	AC008662.1	FAIL	(Intercept)	-27.3	0.0503386	-542.379	0	0	count	0
46159	AC008738.3	0	AC008738.3	FAIL	(Intercept)	-27.3	0.0503386	-542.379	0	0	count	0
46162	AC008738.7	0	AC008738.7	FAIL	(Intercept)	-27.3	0.0503386	-542.379	0	0	count	0
46165	AC008759.3	0	AC008759.3	FAIL	(Intercept)	-27.3	0.0503386	-542.379	0	0	count	0
46168	AC008760.2	0	AC008760.2	FAIL	(Intercept)	-27.3	0.0503386	-542.379	0	0	count	0
46171	AC008764.2	0	AC008764.2	FAIL	(Intercept)	-27.3	0.0503386	-542.379	0	0	count	0
46174	AC008764.7	0	AC008764.7	FAIL	(Intercept)	-27.3	0.0503386	-542.379	0	0	count	0
46180	AC008780.1	0	AC008780.1	FAIL	(Intercept)	-27.3	0.0503386	-542.379	0	0	count	0
46183	AC008780.2	0	AC008780.2	FAIL	(Intercept)	-27.3	0.0503386	-542.379	0	0	count	0
46186	AC008802.1	0	AC008802.1	FAIL	(Intercept)	-27.3	0.0503386	-542.379	0	0	count	0
46189	AC008871.1	0	AC008871.1	FAIL	(Intercept)	-27.3	0.0503386	-542.379	0	0	count	0
46198	AC009055.1	0	AC009055.1	FAIL	(Intercept)	-27.3	0.0503386	-542.379	0	0	count	0
46201	AC009093.10	0	AC009093.10	FAIL	(Intercept)	-27.3	0.0503386	-542.379	0	0	count	0
46204	AC009093.2	0	AC009093.2	FAIL	(Intercept)	-27.3	0.0503386	-542.379	0	0	count	0
46207	AC009093.3	0	AC009093.3	FAIL	(Intercept)	-27.3	0.0503386	-542.379	0	0	count	0
46210	AC009097.1	0	AC009097.1	FAIL	(Intercept)	-27.3	0.0503386	-542.379	0	0	count	0
46213	AC009107.2	0	AC009107.2	FAIL	(Intercept)	-27.3	0.0503386	-542.379	0	0	count	0
46216	AC009117.2	0	AC009117.2	FAIL	(Intercept)	-27.3	0.0503386	-542.379	0	0	count	0
46225	AC009135.1	0	AC009135.1	FAIL	(Intercept)	-27.3	0.0503386	-542.379	0	0	count	0
46231	AC009139.1	0	AC009139.1	FAIL	(Intercept)	-27.3	0.0503386	-542.379	0	0	count	0
46234	AC009154.1	0	AC009154.1	FAIL	(Intercept)	-27.3	0.0503386	-542.379	0	0	count	0
46237	AC009159.3	0	AC009159.3	FAIL	(Intercept)	-27.3	0.0503386	-542.379	0	0	count	0
46243	AC009185.1	0	AC009185.1	FAIL	(Intercept)	-27.3	0.0503386	-542.379	0	0	count	0
46246	AC009226.1	0	AC009226.1	FAIL	(Intercept)	-27.3	0.0503386	-542.379	0	0	count	0
46249	AC009234.1	0	AC009234.1	FAIL	(Intercept)	-27.3	0.0503386	-542.379	0	0	count	0
46252	AC009262.1	0	AC009262.1	FAIL	(Intercept)	-27.3	0.0503386	-542.379	0	0	count	0
46255	AC009271.1	0	AC009271.1	FAIL	(Intercept)	-27.3	0.0503386	-542.379	0	0	count	0
46258	AC009299.3	0	AC009299.3	FAIL	(Intercept)	-27.3	0.0503386	-542.379	0	0	count	0
46261	AC009313.1	0	AC009313.1	FAIL	(Intercept)	-27.3	0.0503386	-542.379	0	0	count	0
46270	AC009365.1	0	AC009365.1	FAIL	(Intercept)	-27.3	0.0503386	-542.379	0	0	count	0
46273	AC009478.1	0	AC009478.1	FAIL	(Intercept)	-27.3	0.0503386	-542.379	0	0	count	0
46276	AC009498.1	0	AC009498.1	FAIL	(Intercept)	-27.3	0.0503386	-542.379	0	0	count	0
46279	AC009501.2	0	AC009501.2	FAIL	(Intercept)	-27.3	0.0503386	-542.379	0	0	count	0
46282	AC009502.1	0	AC009502.1	FAIL	(Intercept)	-27.3	0.0503386	-542.379	0	0	count	0
46285	AC009509.1	0	AC009509.1	FAIL	(Intercept)	-27.3	0.0503386	-542.379	0	0	count	0
46288	AC009518.1	0	AC009518.1	FAIL	(Intercept)	-27.3	0.0503386	-542.379	0	0	count	0
46291	AC009542.1	0	AC009542.1	FAIL	(Intercept)	-27.3	0.0503386	-542.379	0	0	count	0
46297	AC009554.2	0	AC009554.2	FAIL	(Intercept)	-27.3	0.0503386	-542.379	0	0	count	0
46300	AC009562.1	0	AC009562.1	FAIL	(Intercept)	-27.3	0.0503386	-542.379	0	0	count	0
46303	AC009563.1	0	AC009563.1	FAIL	(Intercept)	-27.3	0.0503386	-542.379	0	0	count	0
46306	AC009567.1	0	AC009567.1	FAIL	(Intercept)	-27.3	0.0503386	-542.379	0	0	count	0
46309	AC009623.3	0	AC009623.3	FAIL	(Intercept)	-27.3	0.0503386	-542.379	0	0	count	0
46312	AC009630.3	0	AC009630.3	FAIL	(Intercept)	-27.3	0.0503386	-542.379	0	0	count	0
46315	AC009646.2	0	AC009646.2	FAIL	(Intercept)	-27.3	0.0503386	-542.379	0	0	count	0
46318	AC009803.1	0	AC009803.1	FAIL	(Intercept)	-27.3	0.0503386	-542.379	0	0	count	0
46321	AC009831.3	0	AC009831.3	FAIL	(Intercept)	-27.3	0.0503386	-542.379	0	0	count	0
46324	AC009884.1	0	AC009884.1	FAIL	(Intercept)	-27.3	0.0503386	-542.379	0	0	count	0
46330	AC009961.1	0	AC009961.1	FAIL	(Intercept)	-27.3	0.0503386	-542.379	0	0	count	0
46336	AC009971.1	0	AC009971.1	FAIL	(Intercept)	-27.3	0.0503386	-542.379	0	0	count	0
46339	AC009975.2	1	AC009975.2	FAIL	(Intercept)	-27.3	0.0503386	-542.379	0	0	count	0
46342	AC010148.1	0	AC010148.1	FAIL	(Intercept)	-27.3	0.0503386	-542.379	0	0	count	0
46348	AC010168.1	0	AC010168.1	FAIL	(Intercept)	-27.3	0.0503386	-542.379	0	0	count	0
46351	AC010186.2	0	AC010186.2	FAIL	(Intercept)	-27.3	0.0503386	-542.379	0	0	count	0
46354	AC010186.4	0	AC010186.4	FAIL	(Intercept)	-27.3	0.0503386	-542.379	0	0	count	0
46357	AC010196.1	0	AC010196.1	FAIL	(Intercept)	-27.3	0.0503386	-542.379	0	0	count	0
46360	AC010197.1	0	AC010197.1	FAIL	(Intercept)	-27.3	0.0503386	-542.379	0	0	count	0
46363	AC010198.1	0	AC010198.1	FAIL	(Intercept)	-27.3	0.0503386	-542.379	0	0	count	0
46366	AC010198.2	0	AC010198.2	FAIL	(Intercept)	-27.3	0.0503386	-542.379	0	0	count	0
46369	AC010201.2	0	AC010201.2	FAIL	(Intercept)	-27.3	0.0503386	-542.379	0	0	count	0
46372	AC010223.1	0	AC010223.1	FAIL	(Intercept)	-27.3	0.0503386	-542.379	0	0	count	0
46378	AC010320.4	0	AC010320.4	FAIL	(Intercept)	-27.3	0.0503386	-542.379	0	0	count	0
46381	AC010328.3	0	AC010328.3	FAIL	(Intercept)	-27.3	0.0503386	-542.379	0	0	count	0
46384	AC010335.3	0	AC010335.3	FAIL	(Intercept)	-27.3	0.0503386	-542.379	0	0	count	0
46387	AC010395.1	0	AC010395.1	FAIL	(Intercept)	-27.3	0.0503386	-542.379	0	0	count	0
46393	AC010451.1	0	AC010451.1	FAIL	(Intercept)	-27.3	0.0503386	-542.379	0	0	count	0
46402	AC010528.1	0	AC010528.1	FAIL	(Intercept)	-27.3	0.0503386	-542.379	0	0	count	0
46405	AC010531.4	0	AC010531.4	FAIL	(Intercept)	-27.3	0.0503386	-542.379	0	0	count	0
46408	AC010551.3	0	AC010551.3	FAIL	(Intercept)	-27.3	0.0503386	-542.379	0	0	count	0
46411	AC010601.1	0	AC010601.1	FAIL	(Intercept)	-27.3	0.0503386	-542.379	0	0	count	0
46417	AC010627.1	0	AC010627.1	FAIL	(Intercept)	-27.3	0.0503386	-542.379	0	0	count	0
46420	AC010632.2	0	AC010632.2	FAIL	(Intercept)	-27.3	0.0503386	-542.379	0	0	count	0
46429	AC010745.5	0	AC010745.5	FAIL	(Intercept)	-27.3	0.0503386	-542.379	0	0	count	0
46438	AC010967.1	0	AC010967.1	FAIL	(Intercept)	-27.3	0.0503386	-542.379	0	0	count	0
46450	AC010997.3	0	AC010997.3	FAIL	(Intercept)	-27.3	0.0503386	-542.379	0	0	count	0
46453	AC010997.5	0	AC010997.5	FAIL	(Intercept)	-27.3	0.0503386	-542.379	0	0	count	0
46462	AC011092.2	0	AC011092.2	FAIL	(Intercept)	-27.3	0.0503386	-542.379	0	0	count	0
46465	AC011124.1	0	AC011124.1	FAIL	(Intercept)	-27.3	0.0503386	-542.379	0	0	count	0
46468	AC011242.1	0	AC011242.1	FAIL	(Intercept)	-27.3	0.0503386	-542.379	0	0	count	0
46471	AC011294.1	0	AC011294.1	FAIL	(Intercept)	-27.3	0.0503386	-542.379	0	0	count	0
46474	AC011306.1	0	AC011306.1	FAIL	(Intercept)	-27.3	0.0503386	-542.379	0	0	count	0
46477	AC011369.1	0	AC011369.1	FAIL	(Intercept)	-27.3	0.0503386	-542.379	0	0	count	0
46480	AC011379.1	0	AC011379.1	FAIL	(Intercept)	-27.3	0.0503386	-542.379	0	0	count	0
46483	AC011379.2	0	AC011379.2	FAIL	(Intercept)	-27.3	0.0503386	-542.379	0	0	count	0
46486	AC011396.2	0	AC011396.2	FAIL	(Intercept)	-27.3	0.0503386	-542.379	0	0	count	0
46489	AC011462.1	0	AC011462.1	FAIL	(Intercept)	-27.3	0.0503386	-542.379	0	0	count	0
46492	AC011462.6	0	AC011462.6	FAIL	(Intercept)	-27.3	0.0503386	-542.379	0	0	count	0
46501	AC011479.1	0	AC011479.1	FAIL	(Intercept)	-27.3	0.0503386	-542.379	0	0	count	0
46504	AC011479.4	0	AC011479.4	FAIL	(Intercept)	-27.3	0.0503386	-542.379	0	0	count	0
46510	AC011484.1	0	AC011484.1	FAIL	(Intercept)	-27.3	0.0503386	-542.379	0	0	count	0
46516	AC011529.1	0	AC011529.1	FAIL	(Intercept)	-27.3	0.0503386	-542.379	0	0	count	0
46522	AC011604.2	0	AC011604.2	FAIL	(Intercept)	-27.3	0.0503386	-542.379	0	0	count	0
46525	AC011632.1	0	AC011632.1	FAIL	(Intercept)	-27.3	0.0503386	-542.379	0	0	count	0
46528	AC011754.1	0	AC011754.1	FAIL	(Intercept)	-27.3	0.0503386	-542.379	0	0	count	0
46537	AC011891.1	0	AC011891.1	FAIL	(Intercept)	-27.3	0.0503386	-542.379	0	0	count	0
46540	AC011901.1	0	AC011901.1	FAIL	(Intercept)	-27.3	0.0503386	-542.379	0	0	count	0
46546	AC011990.1	0	AC011990.1	FAIL	(Intercept)	-27.3	0.0503386	-542.379	0	0	count	0
46555	AC012020.1	0	AC012020.1	FAIL	(Intercept)	-27.3	0.0503386	-542.379	0	0	count	0
46558	AC012055.1	0	AC012055.1	FAIL	(Intercept)	-27.3	0.0503386	-542.379	0	0	count	0
46561	AC012081.1	0	AC012081.1	FAIL	(Intercept)	-27.3	0.0503386	-542.379	0	0	count	0
46564	AC012150.2	0	AC012150.2	FAIL	(Intercept)	-27.3	0.0503386	-542.379	0	0	count	0
46567	AC012174.1	0	AC012174.1	FAIL	(Intercept)	-27.3	0.0503386	-542.379	0	0	count	0
46570	AC012181.2	0	AC012181.2	FAIL	(Intercept)	-27.3	0.0503386	-542.379	0	0	count	0
46576	AC012322.1	0	AC012322.1	FAIL	(Intercept)	-27.3	0.0503386	-542.379	0	0	count	0
46579	AC012349.1	0	AC012349.1	FAIL	(Intercept)	-27.3	0.0503386	-542.379	0	0	count	0
46588	AC012368.1	0	AC012368.1	FAIL	(Intercept)	-27.3	0.0503386	-542.379	0	0	count	0
46591	AC012370.1	0	AC012370.1	FAIL	(Intercept)	-27.3	0.0503386	-542.379	0	0	count	0
46594	AC012404.1	0	AC012404.1	FAIL	(Intercept)	-27.3	0.0503386	-542.379	0	0	count	0
46597	AC012409.1	0	AC012409.1	FAIL	(Intercept)	-27.3	0.0503386	-542.379	0	0	count	0
46600	AC012409.2	0	AC012409.2	FAIL	(Intercept)	-27.3	0.0503386	-542.379	0	0	count	0
46603	AC012499.1	0	AC012499.1	FAIL	(Intercept)	-27.3	0.0503386	-542.379	0	0	count	0
46609	AC012519.1	0	AC012519.1	FAIL	(Intercept)	-27.3	0.0503386	-542.379	0	0	count	0
46612	AC012531.3	0	AC012531.3	FAIL	(Intercept)	-27.3	0.0503386	-542.379	0	0	count	0
46615	AC012560.1	0	AC012560.1	FAIL	(Intercept)	-27.3	0.0503386	-542.379	0	0	count	0
46618	AC012574.1	0	AC012574.1	FAIL	(Intercept)	-27.3	0.0503386	-542.379	0	0	count	0
46627	AC012618.1	0	AC012618.1	FAIL	(Intercept)	-27.3	0.0503386	-542.379	0	0	count	0
46630	AC012625.1	0	AC012625.1	FAIL	(Intercept)	-27.3	0.0503386	-542.379	0	0	count	0
46633	AC012645.3	0	AC012645.3	FAIL	(Intercept)	-27.3	0.0503386	-542.379	0	0	count	0
46636	AC012668.3	0	AC012668.3	FAIL	(Intercept)	-27.3	0.0503386	-542.379	0	0	count	0
46639	AC013271.1	0	AC013271.1	FAIL	(Intercept)	-27.3	0.0503386	-542.379	0	0	count	0
46642	AC013399.1	0	AC013399.1	FAIL	(Intercept)	-27.3	0.0503386	-542.379	0	0	count	0
46645	AC013417.1	0	AC013417.1	FAIL	(Intercept)	-27.3	0.0503386	-542.379	0	0	count	0
46648	AC013451.1	0	AC013451.1	FAIL	(Intercept)	-27.3	0.0503386	-542.379	0	0	count	0
46651	AC013460.1	0	AC013460.1	FAIL	(Intercept)	-27.3	0.0503386	-542.379	0	0	count	0
46660	AC013643.2	0	AC013643.2	FAIL	(Intercept)	-27.3	0.0503386	-542.379	0	0	count	0
46666	AC013762.1	0	AC013762.1	FAIL	(Intercept)	-27.3	0.0503386	-542.379	0	0	count	0
46675	AC015712.1	0	AC015712.1	FAIL	(Intercept)	-27.3	0.0503386	-542.379	0	0	count	0
46678	AC015712.2	0	AC015712.2	FAIL	(Intercept)	-27.3	0.0503386	-542.379	0	0	count	0
46684	AC015849.3	0	AC015849.3	FAIL	(Intercept)	-27.3	0.0503386	-542.379	0	0	count	0
46690	AC015878.1	0	AC015878.1	FAIL	(Intercept)	-27.3	0.0503386	-542.379	0	0	count	0
46693	AC015911.11	0	AC015911.11	FAIL	(Intercept)	-27.3	0.0503386	-542.379	0	0	count	0
46699	AC016027.1	0	AC016027.1	FAIL	(Intercept)	-27.3	0.0503386	-542.379	0	0	count	0
46705	AC016229.2	0	AC016229.2	FAIL	(Intercept)	-27.3	0.0503386	-542.379	0	0	count	0
46708	AC016382.1	0	AC016382.1	FAIL	(Intercept)	-27.3	0.0503386	-542.379	0	0	count	0
46714	AC016394.2	0	AC016394.2	FAIL	(Intercept)	-27.3	0.0503386	-542.379	0	0	count	0
46717	AC016405.3	0	AC016405.3	FAIL	(Intercept)	-27.3	0.0503386	-542.379	0	0	count	0
46723	AC016576.1	0	AC016576.1	FAIL	(Intercept)	-27.3	0.0503386	-542.379	0	0	count	0
46726	AC016582.1	0	AC016582.1	FAIL	(Intercept)	-27.3	0.0503386	-542.379	0	0	count	0
46738	AC016642.1	0	AC016642.1	FAIL	(Intercept)	-27.3	0.0503386	-542.379	0	0	count	0
46741	AC016687.2	0	AC016687.2	FAIL	(Intercept)	-27.3	0.0503386	-542.379	0	0	count	0
46747	AC016700.2	0	AC016700.2	FAIL	(Intercept)	-27.3	0.0503386	-542.379	0	0	count	0
46750	AC016705.1	0	AC016705.1	FAIL	(Intercept)	-27.3	0.0503386	-542.379	0	0	count	0
46753	AC016712.1	0	AC016712.1	FAIL	(Intercept)	-27.3	0.0503386	-542.379	0	0	count	0
46756	AC016717.2	0	AC016717.2	FAIL	(Intercept)	-27.3	0.0503386	-542.379	0	0	count	0
46759	AC016723.1	0	AC016723.1	FAIL	(Intercept)	-27.3	0.0503386	-542.379	0	0	count	0
46762	AC016730.1	0	AC016730.1	FAIL	(Intercept)	-27.3	0.0503386	-542.379	0	0	count	0
46768	AC016747.2	0	AC016747.2	FAIL	(Intercept)	-27.3	0.0503386	-542.379	0	0	count	0
46774	AC016813.1	0	AC016813.1	FAIL	(Intercept)	-27.3	0.0503386	-542.379	0	0	count	0
46777	AC016822.1	0	AC016822.1	FAIL	(Intercept)	-27.3	0.0503386	-542.379	0	0	count	0
46780	AC016885.1	0	AC016885.1	FAIL	(Intercept)	-27.3	0.0503386	-542.379	0	0	count	0
46783	AC016907.2	0	AC016907.2	FAIL	(Intercept)	-27.3	0.0503386	-542.379	0	0	count	0
46792	AC017002.3	0	AC017002.3	FAIL	(Intercept)	-27.3	0.0503386	-542.379	0	0	count	0
46795	AC017002.5	0	AC017002.5	FAIL	(Intercept)	-27.3	0.0503386	-542.379	0	0	count	0
46798	AC017002.6	0	AC017002.6	FAIL	(Intercept)	-27.3	0.0503386	-542.379	0	0	count	0
46801	AC017007.2	0	AC017007.2	FAIL	(Intercept)	-27.3	0.0503386	-542.379	0	0	count	0
46807	AC017074.1	0	AC017074.1	FAIL	(Intercept)	-27.3	0.0503386	-542.379	0	0	count	0
46810	AC017091.1	0	AC017091.1	FAIL	(Intercept)	-27.3	0.0503386	-542.379	0	0	count	0
46819	AC018362.3	0	AC018362.3	FAIL	(Intercept)	-27.3	0.0503386	-542.379	0	0	count	0
46825	AC018450.1	0	AC018450.1	FAIL	(Intercept)	-27.3	0.0503386	-542.379	0	0	count	0
46828	AC018462.1	0	AC018462.1	FAIL	(Intercept)	-27.3	0.0503386	-542.379	0	0	count	0
46834	AC018511.2	0	AC018511.2	FAIL	(Intercept)	-27.3	0.0503386	-542.379	0	0	count	0
46837	AC018521.6	0	AC018521.6	FAIL	(Intercept)	-27.3	0.0503386	-542.379	0	0	count	0
46840	AC018541.1	0	AC018541.1	FAIL	(Intercept)	-27.3	0.0503386	-542.379	0	0	count	0
46843	AC018554.1	0	AC018554.1	FAIL	(Intercept)	-27.3	0.0503386	-542.379	0	0	count	0
46849	AC018653.1	0	AC018653.1	FAIL	(Intercept)	-27.3	0.0503386	-542.379	0	0	count	0
46852	AC018683.1	0	AC018683.1	FAIL	(Intercept)	-27.3	0.0503386	-542.379	0	0	count	0
46858	AC018709.1	0	AC018709.1	FAIL	(Intercept)	-27.3	0.0503386	-542.379	0	0	count	0
46861	AC018717.1	0	AC018717.1	FAIL	(Intercept)	-27.3	0.0503386	-542.379	0	0	count	0
46864	AC018737.1	0	AC018737.1	FAIL	(Intercept)	-27.3	0.0503386	-542.379	0	0	count	0
46867	AC018767.1	0	AC018767.1	FAIL	(Intercept)	-27.3	0.0503386	-542.379	0	0	count	0
46870	AC018797.3	0	AC018797.3	FAIL	(Intercept)	-27.3	0.0503386	-542.379	0	0	count	0
46882	AC019069.1	0	AC019069.1	FAIL	(Intercept)	-27.3	0.0503386	-542.379	0	0	count	0
46891	AC019130.1	0	AC019130.1	FAIL	(Intercept)	-27.3	0.0503386	-542.379	0	0	count	0
46897	AC019183.1	0	AC019183.1	FAIL	(Intercept)	-27.3	0.0503386	-542.379	0	0	count	0
46900	AC019185.2	0	AC019185.2	FAIL	(Intercept)	-27.3	0.0503386	-542.379	0	0	count	0
46903	AC019209.3	0	AC019209.3	FAIL	(Intercept)	-27.3	0.0503386	-542.379	0	0	count	0
46906	AC019226.1	0	AC019226.1	FAIL	(Intercept)	-27.3	0.0503386	-542.379	0	0	count	0
46909	AC019270.1	0	AC019270.1	FAIL	(Intercept)	-27.3	0.0503386	-542.379	0	0	count	0
46918	AC020636.1	0	AC020636.1	FAIL	(Intercept)	-27.3	0.0503386	-542.379	0	0	count	0
46921	AC020636.2	0	AC020636.2	FAIL	(Intercept)	-27.3	0.0503386	-542.379	0	0	count	0
46927	AC020658.5	0	AC020658.5	FAIL	(Intercept)	-27.3	0.0503386	-542.379	0	0	count	0
46930	AC020661.1	0	AC020661.1	FAIL	(Intercept)	-27.3	0.0503386	-542.379	0	0	count	0
46933	AC020661.2	0	AC020661.2	FAIL	(Intercept)	-27.3	0.0503386	-542.379	0	0	count	0
46936	AC020687.1	0	AC020687.1	FAIL	(Intercept)	-27.3	0.0503386	-542.379	0	0	count	0
46939	AC020718.1	0	AC020718.1	FAIL	(Intercept)	-27.3	0.0503386	-542.379	0	0	count	0
46942	AC020898.1	0	AC020898.1	FAIL	(Intercept)	-27.3	0.0503386	-542.379	0	0	count	0
46945	AC020900.1	0	AC020900.1	FAIL	(Intercept)	-27.3	0.0503386	-542.379	0	0	count	0
46951	AC020912.1	0	AC020912.1	FAIL	(Intercept)	-27.3	0.0503386	-542.379	0	0	count	0
46954	AC020916.1	0	AC020916.1	FAIL	(Intercept)	-27.3	0.0503386	-542.379	0	0	count	0
46960	AC020983.1	0	AC020983.1	FAIL	(Intercept)	-27.3	0.0503386	-542.379	0	0	count	0
46966	AC021016.1	0	AC021016.1	FAIL	(Intercept)	-27.3	0.0503386	-542.379	0	0	count	0
46969	AC021074.3	0	AC021074.3	FAIL	(Intercept)	-27.3	0.0503386	-542.379	0	0	count	0
46972	AC021086.1	0	AC021086.1	FAIL	(Intercept)	-27.3	0.0503386	-542.379	0	0	count	0
46975	AC021087.2	1	AC021087.2	FAIL	(Intercept)	-27.3	0.0503386	-542.379	0	0	count	0
46978	AC021192.1	0	AC021192.1	FAIL	(Intercept)	-27.3	0.0503386	-542.379	0	0	count	0
46981	AC021242.2	0	AC021242.2	FAIL	(Intercept)	-27.3	0.0503386	-542.379	0	0	count	0
46987	AC021546.1	0	AC021546.1	FAIL	(Intercept)	-27.3	0.0503386	-542.379	0	0	count	0
46990	AC021594.2	0	AC021594.2	FAIL	(Intercept)	-27.3	0.0503386	-542.379	0	0	count	0
46993	AC021678.2	0	AC021678.2	FAIL	(Intercept)	-27.3	0.0503386	-542.379	0	0	count	0
46996	AC021683.5	0	AC021683.5	FAIL	(Intercept)	-27.3	0.0503386	-542.379	0	0	count	0
46999	AC021723.2	0	AC021723.2	FAIL	(Intercept)	-27.3	0.0503386	-542.379	0	0	count	0
47005	AC022017.1	0	AC022017.1	FAIL	(Intercept)	-27.3	0.0503386	-542.379	0	0	count	0
47008	AC022031.2	0	AC022031.2	FAIL	(Intercept)	-27.3	0.0503386	-542.379	0	0	count	0
47011	AC022126.1	0	AC022126.1	FAIL	(Intercept)	-27.3	0.0503386	-542.379	0	0	count	0
47017	AC022166.1	0	AC022166.1	FAIL	(Intercept)	-27.3	0.0503386	-542.379	0	0	count	0
47020	AC022182.2	0	AC022182.2	FAIL	(Intercept)	-27.3	0.0503386	-542.379	0	0	count	0
47023	AC022217.3	0	AC022217.3	FAIL	(Intercept)	-27.3	0.0503386	-542.379	0	0	count	0
47026	AC022272.1	0	AC022272.1	FAIL	(Intercept)	-27.3	0.0503386	-542.379	0	0	count	0
47029	AC022294.1	0	AC022294.1	FAIL	(Intercept)	-27.3	0.0503386	-542.379	0	0	count	0
47032	AC022335.1	0	AC022335.1	FAIL	(Intercept)	-27.3	0.0503386	-542.379	0	0	count	0
47035	AC022387.1	0	AC022387.1	FAIL	(Intercept)	-27.3	0.0503386	-542.379	0	0	count	0
47038	AC022395.1	0	AC022395.1	FAIL	(Intercept)	-27.3	0.0503386	-542.379	0	0	count	0
47041	AC022498.1	0	AC022498.1	FAIL	(Intercept)	-27.3	0.0503386	-542.379	0	0	count	0
47044	AC022523.1	0	AC022523.1	FAIL	(Intercept)	-27.3	0.0503386	-542.379	0	0	count	0
47050	AC022535.1	0	AC022535.1	FAIL	(Intercept)	-27.3	0.0503386	-542.379	0	0	count	0
47053	AC022540.1	0	AC022540.1	FAIL	(Intercept)	-27.3	0.0503386	-542.379	0	0	count	0
47056	AC022568.1	0	AC022568.1	FAIL	(Intercept)	-27.3	0.0503386	-542.379	0	0	count	0
47059	AC022634.2	0	AC022634.2	FAIL	(Intercept)	-27.3	0.0503386	-542.379	0	0	count	0
47062	AC022733.1	0	AC022733.1	FAIL	(Intercept)	-27.3	0.0503386	-542.379	0	0	count	0
47065	AC022816.1	0	AC022816.1	FAIL	(Intercept)	-27.3	0.0503386	-542.379	0	0	count	0
47071	AC022872.1	0	AC022872.1	FAIL	(Intercept)	-27.3	0.0503386	-542.379	0	0	count	0
47074	AC022905.1	0	AC022905.1	FAIL	(Intercept)	-27.3	0.0503386	-542.379	0	0	count	0
47077	AC022915.2	0	AC022915.2	FAIL	(Intercept)	-27.3	0.0503386	-542.379	0	0	count	0
47080	AC023034.1	0	AC023034.1	FAIL	(Intercept)	-27.3	0.0503386	-542.379	0	0	count	0
47083	AC023154.1	0	AC023154.1	FAIL	(Intercept)	-27.3	0.0503386	-542.379	0	0	count	0
47086	AC023161.2	0	AC023161.2	FAIL	(Intercept)	-27.3	0.0503386	-542.379	0	0	count	0
47092	AC023385.1	0	AC023385.1	FAIL	(Intercept)	-27.3	0.0503386	-542.379	0	0	count	0
47098	AC023421.2	0	AC023421.2	FAIL	(Intercept)	-27.3	0.0503386	-542.379	0	0	count	0
47110	AC023794.1	0	AC023794.1	FAIL	(Intercept)	-27.3	0.0503386	-542.379	0	0	count	0
47113	AC023796.1	0	AC023796.1	FAIL	(Intercept)	-27.3	0.0503386	-542.379	0	0	count	0
47116	AC023824.3	0	AC023824.3	FAIL	(Intercept)	-27.3	0.0503386	-542.379	0	0	count	0
47119	AC023825.2	0	AC023825.2	FAIL	(Intercept)	-27.3	0.0503386	-542.379	0	0	count	0
47122	AC023905.1	0	AC023905.1	FAIL	(Intercept)	-27.3	0.0503386	-542.379	0	0	count	0
47128	AC023908.2	0	AC023908.2	FAIL	(Intercept)	-27.3	0.0503386	-542.379	0	0	count	0
47131	AC024022.1	0	AC024022.1	FAIL	(Intercept)	-27.3	0.0503386	-542.379	0	0	count	0
47134	AC024084.1	0	AC024084.1	FAIL	(Intercept)	-27.3	0.0503386	-542.379	0	0	count	0
47137	AC024132.3	0	AC024132.3	FAIL	(Intercept)	-27.3	0.0503386	-542.379	0	0	count	0
47143	AC024257.1	0	AC024257.1	FAIL	(Intercept)	-27.3	0.0503386	-542.379	0	0	count	0
47146	AC024382.1	0	AC024382.1	FAIL	(Intercept)	-27.3	0.0503386	-542.379	0	0	count	0
47149	AC024559.1	0	AC024559.1	FAIL	(Intercept)	-27.3	0.0503386	-542.379	0	0	count	0
47161	AC024940.2	0	AC024940.2	FAIL	(Intercept)	-27.3	0.0503386	-542.379	0	0	count	0
47164	AC024940.6	0	AC024940.6	FAIL	(Intercept)	-27.3	0.0503386	-542.379	0	0	count	0
47167	AC025040.1	0	AC025040.1	FAIL	(Intercept)	-27.3	0.0503386	-542.379	0	0	count	0
47176	AC025180.1	0	AC025180.1	FAIL	(Intercept)	-27.3	0.0503386	-542.379	0	0	count	0
47179	AC025187.1	0	AC025187.1	FAIL	(Intercept)	-27.3	0.0503386	-542.379	0	0	count	0
47185	AC025219.1	0	AC025219.1	FAIL	(Intercept)	-27.3	0.0503386	-542.379	0	0	count	0
47191	AC025263.1	0	AC025263.1	FAIL	(Intercept)	-27.3	0.0503386	-542.379	0	0	count	0
47194	AC025284.1	0	AC025284.1	FAIL	(Intercept)	-27.3	0.0503386	-542.379	0	0	count	0
47197	AC025419.1	0	AC025419.1	FAIL	(Intercept)	-27.3	0.0503386	-542.379	0	0	count	0
47200	AC025434.1	0	AC025434.1	FAIL	(Intercept)	-27.3	0.0503386	-542.379	0	0	count	0
47203	AC025437.4	0	AC025437.4	FAIL	(Intercept)	-27.3	0.0503386	-542.379	0	0	count	0
47209	AC025524.2	0	AC025524.2	FAIL	(Intercept)	-27.3	0.0503386	-542.379	0	0	count	0
47212	AC025566.1	0	AC025566.1	FAIL	(Intercept)	-27.3	0.0503386	-542.379	0	0	count	0
47215	AC025569.1	0	AC025569.1	FAIL	(Intercept)	-27.3	0.0503386	-542.379	0	0	count	0
47218	AC025575.1	0	AC025575.1	FAIL	(Intercept)	-27.3	0.0503386	-542.379	0	0	count	0
47221	AC025575.2	0	AC025575.2	FAIL	(Intercept)	-27.3	0.0503386	-542.379	0	0	count	0
47227	AC025627.1	0	AC025627.1	FAIL	(Intercept)	-27.3	0.0503386	-542.379	0	0	count	0
47230	AC025750.2	0	AC025750.2	FAIL	(Intercept)	-27.3	0.0503386	-542.379	0	0	count	0
47233	AC025822.2	0	AC025822.2	FAIL	(Intercept)	-27.3	0.0503386	-542.379	0	0	count	0
47236	AC025887.2	0	AC025887.2	FAIL	(Intercept)	-27.3	0.0503386	-542.379	0	0	count	0
47239	AC026167.1	0	AC026167.1	FAIL	(Intercept)	-27.3	0.0503386	-542.379	0	0	count	0
47242	AC026273.1	0	AC026273.1	FAIL	(Intercept)	-27.3	0.0503386	-542.379	0	0	count	0
47245	AC026347.1	0	AC026347.1	FAIL	(Intercept)	-27.3	0.0503386	-542.379	0	0	count	0
47248	AC026353.1	0	AC026353.1	FAIL	(Intercept)	-27.3	0.0503386	-542.379	0	0	count	0
47251	AC026391.1	0	AC026391.1	FAIL	(Intercept)	-27.3	0.0503386	-542.379	0	0	count	0
47254	AC026458.2	0	AC026458.2	FAIL	(Intercept)	-27.3	0.0503386	-542.379	0	0	count	0
47260	AC026462.3	0	AC026462.3	FAIL	(Intercept)	-27.3	0.0503386	-542.379	0	0	count	0
47263	AC026470.3	0	AC026470.3	FAIL	(Intercept)	-27.3	0.0503386	-542.379	0	0	count	0
47272	AC026787.1	0	AC026787.1	FAIL	(Intercept)	-27.3	0.0503386	-542.379	0	0	count	0
47275	AC026798.1	0	AC026798.1	FAIL	(Intercept)	-27.3	0.0503386	-542.379	0	0	count	0
47281	AC026904.3	0	AC026904.3	FAIL	(Intercept)	-27.3	0.0503386	-542.379	0	0	count	0
47284	AC026951.1	0	AC026951.1	FAIL	(Intercept)	-27.3	0.0503386	-542.379	0	0	count	0
47287	AC027013.1	0	AC027013.1	FAIL	(Intercept)	-27.3	0.0503386	-542.379	0	0	count	0
47290	AC027018.1	0	AC027018.1	FAIL	(Intercept)	-27.3	0.0503386	-542.379	0	0	count	0
47296	AC027088.2	0	AC027088.2	FAIL	(Intercept)	-27.3	0.0503386	-542.379	0	0	count	0
47305	AC027306.1	0	AC027306.1	FAIL	(Intercept)	-27.3	0.0503386	-542.379	0	0	count	0
47308	AC027329.1	0	AC027329.1	FAIL	(Intercept)	-27.3	0.0503386	-542.379	0	0	count	0
47311	AC027369.1	0	AC027369.1	FAIL	(Intercept)	-27.3	0.0503386	-542.379	0	0	count	0
47317	AC027701.1	0	AC027701.1	FAIL	(Intercept)	-27.3	0.0503386	-542.379	0	0	count	0
47320	AC027779.1	0	AC027779.1	FAIL	(Intercept)	-27.3	0.0503386	-542.379	0	0	count	0
47326	AC034205.2	0	AC034205.2	FAIL	(Intercept)	-27.3	0.0503386	-542.379	0	0	count	0
47329	AC034206.1	0	AC034206.1	FAIL	(Intercept)	-27.3	0.0503386	-542.379	0	0	count	0
47335	AC034228.4	0	AC034228.4	FAIL	(Intercept)	-27.3	0.0503386	-542.379	0	0	count	0
47338	AC034238.1	0	AC034238.1	FAIL	(Intercept)	-27.3	0.0503386	-542.379	0	0	count	0
47341	AC036101.1	0	AC036101.1	FAIL	(Intercept)	-27.3	0.0503386	-542.379	0	0	count	0
47347	AC036214.4	0	AC036214.4	FAIL	(Intercept)	-27.3	0.0503386	-542.379	0	0	count	0
47362	AC044802.1	0	AC044802.1	FAIL	(Intercept)	-27.3	0.0503386	-542.379	0	0	count	0
47368	AC046130.1	0	AC046130.1	FAIL	(Intercept)	-27.3	0.0503386	-542.379	0	0	count	0
47371	AC046195.1	0	AC046195.1	FAIL	(Intercept)	-27.3	0.0503386	-542.379	0	0	count	0
47374	AC046195.2	0	AC046195.2	FAIL	(Intercept)	-27.3	0.0503386	-542.379	0	0	count	0
47377	AC048341.2	0	AC048341.2	FAIL	(Intercept)	-27.3	0.0503386	-542.379	0	0	count	0
47380	AC055733.2	0	AC055733.2	FAIL	(Intercept)	-27.3	0.0503386	-542.379	0	0	count	0
47383	AC055758.2	0	AC055758.2	FAIL	(Intercept)	-27.3	0.0503386	-542.379	0	0	count	0
47389	AC055854.1	0	AC055854.1	FAIL	(Intercept)	-27.3	0.0503386	-542.379	0	0	count	0
47392	AC055878.1	0	AC055878.1	FAIL	(Intercept)	-27.3	0.0503386	-542.379	0	0	count	0
47395	AC060234.1	0	AC060234.1	FAIL	(Intercept)	-27.3	0.0503386	-542.379	0	0	count	0
47398	AC060234.3	0	AC060234.3	FAIL	(Intercept)	-27.3	0.0503386	-542.379	0	0	count	0
47401	AC060765.1	0	AC060765.1	FAIL	(Intercept)	-27.3	0.0503386	-542.379	0	0	count	0
47407	AC063949.2	0	AC063949.2	FAIL	(Intercept)	-27.3	0.0503386	-542.379	0	0	count	0
47413	AC063977.6	0	AC063977.6	FAIL	(Intercept)	-27.3	0.0503386	-542.379	0	0	count	0
47416	AC063980.1	0	AC063980.1	FAIL	(Intercept)	-27.3	0.0503386	-542.379	0	0	count	0
47419	AC064834.1	0	AC064834.1	FAIL	(Intercept)	-27.3	0.0503386	-542.379	0	0	count	0
47422	AC064871.1	0	AC064871.1	FAIL	(Intercept)	-27.3	0.0503386	-542.379	0	0	count	0
47425	AC064875.1	0	AC064875.1	FAIL	(Intercept)	-27.3	0.0503386	-542.379	0	0	count	0
47431	AC067751.1	0	AC067751.1	FAIL	(Intercept)	-27.3	0.0503386	-542.379	0	0	count	0
47440	AC068196.1	0	AC068196.1	FAIL	(Intercept)	-27.3	0.0503386	-542.379	0	0	count	0
47452	AC068305.2	0	AC068305.2	FAIL	(Intercept)	-27.3	0.0503386	-542.379	0	0	count	0
47455	AC068446.3	0	AC068446.3	FAIL	(Intercept)	-27.3	0.0503386	-542.379	0	0	count	0
47461	AC068533.3	0	AC068533.3	FAIL	(Intercept)	-27.3	0.0503386	-542.379	0	0	count	0
47464	AC068643.1	0	AC068643.1	FAIL	(Intercept)	-27.3	0.0503386	-542.379	0	0	count	0
47467	AC068672.2	0	AC068672.2	FAIL	(Intercept)	-27.3	0.0503386	-542.379	0	0	count	0
47470	AC068672.3	0	AC068672.3	FAIL	(Intercept)	-27.3	0.0503386	-542.379	0	0	count	0
47473	AC068722.1	0	AC068722.1	FAIL	(Intercept)	-27.3	0.0503386	-542.379	0	0	count	0
47476	AC068756.1	0	AC068756.1	FAIL	(Intercept)	-27.3	0.0503386	-542.379	0	0	count	0
47479	AC068759.1	0	AC068759.1	FAIL	(Intercept)	-27.3	0.0503386	-542.379	0	0	count	0
47482	AC068875.1	0	AC068875.1	FAIL	(Intercept)	-27.3	0.0503386	-542.379	0	0	count	0
47485	AC068985.1	0	AC068985.1	FAIL	(Intercept)	-27.3	0.0503386	-542.379	0	0	count	0
47488	AC069133.1	0	AC069133.1	FAIL	(Intercept)	-27.3	0.0503386	-542.379	0	0	count	0
47497	AC069272.1	0	AC069272.1	FAIL	(Intercept)	-27.3	0.0503386	-542.379	0	0	count	0
47500	AC069277.1	0	AC069277.1	FAIL	(Intercept)	-27.3	0.0503386	-542.379	0	0	count	0
47503	AC069368.1	0	AC069368.1	FAIL	(Intercept)	-27.3	0.0503386	-542.379	0	0	count	0
47506	AC069410.1	0	AC069410.1	FAIL	(Intercept)	-27.3	0.0503386	-542.379	0	0	count	0
47509	AC069437.1	0	AC069437.1	FAIL	(Intercept)	-27.3	0.0503386	-542.379	0	0	count	0
47512	AC069444.2	0	AC069444.2	FAIL	(Intercept)	-27.3	0.0503386	-542.379	0	0	count	0
47515	AC069542.1	0	AC069542.1	FAIL	(Intercept)	-27.3	0.0503386	-542.379	0	0	count	0
47518	AC069549.1	0	AC069549.1	FAIL	(Intercept)	-27.3	0.0503386	-542.379	0	0	count	0
47527	AC073062.1	0	AC073062.1	FAIL	(Intercept)	-27.3	0.0503386	-542.379	0	0	count	0
47530	AC073082.1	0	AC073082.1	FAIL	(Intercept)	-27.3	0.0503386	-542.379	0	0	count	0
47533	AC073115.1	0	AC073115.1	FAIL	(Intercept)	-27.3	0.0503386	-542.379	0	0	count	0
47536	AC073130.2	0	AC073130.2	FAIL	(Intercept)	-27.3	0.0503386	-542.379	0	0	count	0
47548	AC073311.1	0	AC073311.1	FAIL	(Intercept)	-27.3	0.0503386	-542.379	0	0	count	0
47551	AC073316.1	0	AC073316.1	FAIL	(Intercept)	-27.3	0.0503386	-542.379	0	0	count	0
47554	AC073316.3	0	AC073316.3	FAIL	(Intercept)	-27.3	0.0503386	-542.379	0	0	count	0
47560	AC073325.1	0	AC073325.1	FAIL	(Intercept)	-27.3	0.0503386	-542.379	0	0	count	0
47563	AC073346.1	0	AC073346.1	FAIL	(Intercept)	-27.3	0.0503386	-542.379	0	0	count	0
47566	AC073359.2	0	AC073359.2	FAIL	(Intercept)	-27.3	0.0503386	-542.379	0	0	count	0
47572	AC073521.1	0	AC073521.1	FAIL	(Intercept)	-27.3	0.0503386	-542.379	0	0	count	0
47575	AC073530.1	0	AC073530.1	FAIL	(Intercept)	-27.3	0.0503386	-542.379	0	0	count	0
47578	AC073544.1	0	AC073544.1	FAIL	(Intercept)	-27.3	0.0503386	-542.379	0	0	count	0
47581	AC073585.1	0	AC073585.1	FAIL	(Intercept)	-27.3	0.0503386	-542.379	0	0	count	0
47584	AC073861.1	0	AC073861.1	FAIL	(Intercept)	-27.3	0.0503386	-542.379	0	0	count	0
47590	AC073941.1	0	AC073941.1	FAIL	(Intercept)	-27.3	0.0503386	-542.379	0	0	count	0
47593	AC074033.1	0	AC074033.1	FAIL	(Intercept)	-27.3	0.0503386	-542.379	0	0	count	0
47599	AC074237.1	0	AC074237.1	FAIL	(Intercept)	-27.3	0.0503386	-542.379	0	0	count	0
47602	AC074281.2	0	AC074281.2	FAIL	(Intercept)	-27.3	0.0503386	-542.379	0	0	count	0
47605	AC074386.1	0	AC074386.1	FAIL	(Intercept)	-27.3	0.0503386	-542.379	0	0	count	0
47608	AC076968.2	0	AC076968.2	FAIL	(Intercept)	-27.3	0.0503386	-542.379	0	0	count	0
47611	AC078820.2	0	AC078820.2	FAIL	(Intercept)	-27.3	0.0503386	-542.379	0	0	count	0
47614	AC078845.1	0	AC078845.1	FAIL	(Intercept)	-27.3	0.0503386	-542.379	0	0	count	0
47617	AC078846.1	0	AC078846.1	FAIL	(Intercept)	-27.3	0.0503386	-542.379	0	0	count	0
47620	AC078883.1	0	AC078883.1	FAIL	(Intercept)	-27.3	0.0503386	-542.379	0	0	count	0
47623	AC078929.1	0	AC078929.1	FAIL	(Intercept)	-27.3	0.0503386	-542.379	0	0	count	0
47626	AC078950.1	0	AC078950.1	FAIL	(Intercept)	-27.3	0.0503386	-542.379	0	0	count	0
47629	AC078980.1	0	AC078980.1	FAIL	(Intercept)	-27.3	0.0503386	-542.379	0	0	count	0
47635	AC079015.1	0	AC079015.1	FAIL	(Intercept)	-27.3	0.0503386	-542.379	0	0	count	0
47638	AC079062.1	0	AC079062.1	FAIL	(Intercept)	-27.3	0.0503386	-542.379	0	0	count	0
47644	AC079296.1	0	AC079296.1	FAIL	(Intercept)	-27.3	0.0503386	-542.379	0	0	count	0
47647	AC079298.3	0	AC079298.3	FAIL	(Intercept)	-27.3	0.0503386	-542.379	0	0	count	0
47653	AC079313.1	0	AC079313.1	FAIL	(Intercept)	-27.3	0.0503386	-542.379	0	0	count	0
47656	AC079313.2	0	AC079313.2	FAIL	(Intercept)	-27.3	0.0503386	-542.379	0	0	count	0
47659	AC079316.1	0	AC079316.1	FAIL	(Intercept)	-27.3	0.0503386	-542.379	0	0	count	0
47662	AC079340.1	0	AC079340.1	FAIL	(Intercept)	-27.3	0.0503386	-542.379	0	0	count	0
47665	AC079362.1	0	AC079362.1	FAIL	(Intercept)	-27.3	0.0503386	-542.379	0	0	count	0
47668	AC079380.1	0	AC079380.1	FAIL	(Intercept)	-27.3	0.0503386	-542.379	0	0	count	0
47671	AC079414.1	0	AC079414.1	FAIL	(Intercept)	-27.3	0.0503386	-542.379	0	0	count	0
47674	AC079466.2	0	AC079466.2	FAIL	(Intercept)	-27.3	0.0503386	-542.379	0	0	count	0
47680	AC079779.2	0	AC079779.2	FAIL	(Intercept)	-27.3	0.0503386	-542.379	0	0	count	0
47683	AC079801.1	0	AC079801.1	FAIL	(Intercept)	-27.3	0.0503386	-542.379	0	0	count	0
47686	AC079917.1	0	AC079917.1	FAIL	(Intercept)	-27.3	0.0503386	-542.379	0	0	count	0
47689	AC079922.1	0	AC079922.1	FAIL	(Intercept)	-27.3	0.0503386	-542.379	0	0	count	0
47695	AC080038.1	0	AC080038.1	FAIL	(Intercept)	-27.3	0.0503386	-542.379	0	0	count	0
47698	AC080068.1	0	AC080068.1	FAIL	(Intercept)	-27.3	0.0503386	-542.379	0	0	count	0
47701	AC083795.2	0	AC083795.2	FAIL	(Intercept)	-27.3	0.0503386	-542.379	0	0	count	0
47704	AC083837.1	0	AC083837.1	FAIL	(Intercept)	-27.3	0.0503386	-542.379	0	0	count	0
47710	AC084030.1	0	AC084030.1	FAIL	(Intercept)	-27.3	0.0503386	-542.379	0	0	count	0
47716	AC084064.1	0	AC084064.1	FAIL	(Intercept)	-27.3	0.0503386	-542.379	0	0	count	0
47719	AC084116.2	0	AC084116.2	FAIL	(Intercept)	-27.3	0.0503386	-542.379	0	0	count	0
47722	AC084277.1	0	AC084277.1	FAIL	(Intercept)	-27.3	0.0503386	-542.379	0	0	count	0
47725	AC084361.1	0	AC084361.1	FAIL	(Intercept)	-27.3	0.0503386	-542.379	0	0	count	0
47728	AC084365.2	0	AC084365.2	FAIL	(Intercept)	-27.3	0.0503386	-542.379	0	0	count	0
47731	AC084756.1	1	AC084756.1	FAIL	(Intercept)	-27.3	0.0503386	-542.379	0	0	count	0
47734	AC084816.1	0	AC084816.1	FAIL	(Intercept)	-27.3	0.0503386	-542.379	0	0	count	0
47737	AC087235.1	0	AC087235.1	FAIL	(Intercept)	-27.3	0.0503386	-542.379	0	0	count	0
47740	AC087239.1	0	AC087239.1	FAIL	(Intercept)	-27.3	0.0503386	-542.379	0	0	count	0
47746	AC087242.1	0	AC087242.1	FAIL	(Intercept)	-27.3	0.0503386	-542.379	0	0	count	0
47749	AC087269.1	0	AC087269.1	FAIL	(Intercept)	-27.3	0.0503386	-542.379	0	0	count	0
47752	AC087273.2	0	AC087273.2	FAIL	(Intercept)	-27.3	0.0503386	-542.379	0	0	count	0
47758	AC087286.2	0	AC087286.2	FAIL	(Intercept)	-27.3	0.0503386	-542.379	0	0	count	0
47764	AC087457.1	0	AC087457.1	FAIL	(Intercept)	-27.3	0.0503386	-542.379	0	0	count	0
47773	AC087521.2	0	AC087521.2	FAIL	(Intercept)	-27.3	0.0503386	-542.379	0	0	count	0
47779	AC087565.2	0	AC087565.2	FAIL	(Intercept)	-27.3	0.0503386	-542.379	0	0	count	0
47782	AC087639.1	0	AC087639.1	FAIL	(Intercept)	-27.3	0.0503386	-542.379	0	0	count	0
47788	AC087672.2	0	AC087672.2	FAIL	(Intercept)	-27.3	0.0503386	-542.379	0	0	count	0
47797	AC087863.1	0	AC087863.1	FAIL	(Intercept)	-27.3	0.0503386	-542.379	0	0	count	0
47800	AC087897.2	0	AC087897.2	FAIL	(Intercept)	-27.3	0.0503386	-542.379	0	0	count	0
47803	AC090023.2	0	AC090023.2	FAIL	(Intercept)	-27.3	0.0503386	-542.379	0	0	count	0
47806	AC090061.1	0	AC090061.1	FAIL	(Intercept)	-27.3	0.0503386	-542.379	0	0	count	0
47809	AC090092.1	0	AC090092.1	FAIL	(Intercept)	-27.3	0.0503386	-542.379	0	0	count	0
47821	AC090150.1	0	AC090150.1	FAIL	(Intercept)	-27.3	0.0503386	-542.379	0	0	count	0
47824	AC090181.3	0	AC090181.3	FAIL	(Intercept)	-27.3	0.0503386	-542.379	0	0	count	0
47827	AC090204.1	0	AC090204.1	FAIL	(Intercept)	-27.3	0.0503386	-542.379	0	0	count	0
47833	AC090365.1	0	AC090365.1	FAIL	(Intercept)	-27.3	0.0503386	-542.379	0	0	count	0
47839	AC090376.1	0	AC090376.1	FAIL	(Intercept)	-27.3	0.0503386	-542.379	0	0	count	0
47842	AC090398.1	0	AC090398.1	FAIL	(Intercept)	-27.3	0.0503386	-542.379	0	0	count	0
47845	AC090415.2	0	AC090415.2	FAIL	(Intercept)	-27.3	0.0503386	-542.379	0	0	count	0
47848	AC090458.1	0	AC090458.1	FAIL	(Intercept)	-27.3	0.0503386	-542.379	0	0	count	0
47851	AC090503.2	0	AC090503.2	FAIL	(Intercept)	-27.3	0.0503386	-542.379	0	0	count	0
47854	AC090525.1	0	AC090525.1	FAIL	(Intercept)	-27.3	0.0503386	-542.379	0	0	count	0
47857	AC090531.1	0	AC090531.1	FAIL	(Intercept)	-27.3	0.0503386	-542.379	0	0	count	0
47860	AC090543.1	0	AC090543.1	FAIL	(Intercept)	-27.3	0.0503386	-542.379	0	0	count	0
47863	AC090559.1	0	AC090559.1	FAIL	(Intercept)	-27.3	0.0503386	-542.379	0	0	count	0
47866	AC090572.2	0	AC090572.2	FAIL	(Intercept)	-27.3	0.0503386	-542.379	0	0	count	0
47875	AC090592.1	0	AC090592.1	FAIL	(Intercept)	-27.3	0.0503386	-542.379	0	0	count	0
47878	AC090616.1	0	AC090616.1	FAIL	(Intercept)	-27.3	0.0503386	-542.379	0	0	count	0
47884	AC090630.1	0	AC090630.1	FAIL	(Intercept)	-27.3	0.0503386	-542.379	0	0	count	0
47890	AC090673.1	0	AC090673.1	FAIL	(Intercept)	-27.3	0.0503386	-542.379	0	0	count	0
47896	AC090686.1	0	AC090686.1	FAIL	(Intercept)	-27.3	0.0503386	-542.379	0	0	count	0
47899	AC090709.1	0	AC090709.1	FAIL	(Intercept)	-27.3	0.0503386	-542.379	0	0	count	0
47902	AC090720.1	0	AC090720.1	FAIL	(Intercept)	-27.3	0.0503386	-542.379	0	0	count	0
47908	AC090772.2	0	AC090772.2	FAIL	(Intercept)	-27.3	0.0503386	-542.379	0	0	count	0
47914	AC090796.1	0	AC090796.1	FAIL	(Intercept)	-27.3	0.0503386	-542.379	0	0	count	0
47923	AC090897.2	0	AC090897.2	FAIL	(Intercept)	-27.3	0.0503386	-542.379	0	0	count	0
47926	AC090907.2	0	AC090907.2	FAIL	(Intercept)	-27.3	0.0503386	-542.379	0	0	count	0
47929	AC090912.1	0	AC090912.1	FAIL	(Intercept)	-27.3	0.0503386	-542.379	0	0	count	0
47932	AC090912.2	0	AC090912.2	FAIL	(Intercept)	-27.3	0.0503386	-542.379	0	0	count	0
47935	AC090953.1	0	AC090953.1	FAIL	(Intercept)	-27.3	0.0503386	-542.379	0	0	count	0
47941	AC090987.1	0	AC090987.1	FAIL	(Intercept)	-27.3	0.0503386	-542.379	0	0	count	0
47947	AC091057.5	0	AC091057.5	FAIL	(Intercept)	-27.3	0.0503386	-542.379	0	0	count	0
47950	AC091078.1	0	AC091078.1	FAIL	(Intercept)	-27.3	0.0503386	-542.379	0	0	count	0
47956	AC091153.1	0	AC091153.1	FAIL	(Intercept)	-27.3	0.0503386	-542.379	0	0	count	0
47962	AC091390.3	0	AC091390.3	FAIL	(Intercept)	-27.3	0.0503386	-542.379	0	0	count	0
47965	AC091489.1	0	AC091489.1	FAIL	(Intercept)	-27.3	0.0503386	-542.379	0	0	count	0
47971	AC091576.1	0	AC091576.1	FAIL	(Intercept)	-27.3	0.0503386	-542.379	0	0	count	0
47974	AC091812.1	0	AC091812.1	FAIL	(Intercept)	-27.3	0.0503386	-542.379	0	0	count	0
47980	AC091885.2	1	AC091885.2	FAIL	(Intercept)	-27.3	0.0503386	-542.379	0	0	count	0
47986	AC091906.1	0	AC091906.1	FAIL	(Intercept)	-27.3	0.0503386	-542.379	0	0	count	0
47989	AC091939.1	0	AC091939.1	FAIL	(Intercept)	-27.3	0.0503386	-542.379	0	0	count	0
47992	AC091973.1	0	AC091973.1	FAIL	(Intercept)	-27.3	0.0503386	-542.379	0	0	count	0
47995	AC091979.1	0	AC091979.1	FAIL	(Intercept)	-27.3	0.0503386	-542.379	0	0	count	0
48004	AC092114.1	0	AC092114.1	FAIL	(Intercept)	-27.3	0.0503386	-542.379	0	0	count	0
48010	AC092123.1	0	AC092123.1	FAIL	(Intercept)	-27.3	0.0503386	-542.379	0	0	count	0
48013	AC092138.2	0	AC092138.2	FAIL	(Intercept)	-27.3	0.0503386	-542.379	0	0	count	0
48016	AC092153.1	0	AC092153.1	FAIL	(Intercept)	-27.3	0.0503386	-542.379	0	0	count	0
48022	AC092167.1	0	AC092167.1	FAIL	(Intercept)	-27.3	0.0503386	-542.379	0	0	count	0
48025	AC092171.3	0	AC092171.3	FAIL	(Intercept)	-27.3	0.0503386	-542.379	0	0	count	0
48028	AC092335.1	0	AC092335.1	FAIL	(Intercept)	-27.3	0.0503386	-542.379	0	0	count	0
48031	AC092343.1	0	AC092343.1	FAIL	(Intercept)	-27.3	0.0503386	-542.379	0	0	count	0
48034	AC092353.1	0	AC092353.1	FAIL	(Intercept)	-27.3	0.0503386	-542.379	0	0	count	0
48037	AC092378.2	0	AC092378.2	FAIL	(Intercept)	-27.3	0.0503386	-542.379	0	0	count	0
48040	AC092431.1	0	AC092431.1	FAIL	(Intercept)	-27.3	0.0503386	-542.379	0	0	count	0
48043	AC092435.1	0	AC092435.1	FAIL	(Intercept)	-27.3	0.0503386	-542.379	0	0	count	0
48046	AC092436.4	0	AC092436.4	FAIL	(Intercept)	-27.3	0.0503386	-542.379	0	0	count	0
48055	AC092506.1	0	AC092506.1	FAIL	(Intercept)	-27.3	0.0503386	-542.379	0	0	count	0
48058	AC092567.1	0	AC092567.1	FAIL	(Intercept)	-27.3	0.0503386	-542.379	0	0	count	0
48061	AC092573.2	0	AC092573.2	FAIL	(Intercept)	-27.3	0.0503386	-542.379	0	0	count	0
48067	AC092747.1	0	AC092747.1	FAIL	(Intercept)	-27.3	0.0503386	-542.379	0	0	count	0
48073	AC092809.2	0	AC092809.2	FAIL	(Intercept)	-27.3	0.0503386	-542.379	0	0	count	0
48079	AC092810.3	0	AC092810.3	FAIL	(Intercept)	-27.3	0.0503386	-542.379	0	0	count	0
48082	AC092821.1	0	AC092821.1	FAIL	(Intercept)	-27.3	0.0503386	-542.379	0	0	count	0
48085	AC092828.1	1	AC092828.1	FAIL	(Intercept)	-27.3	0.0503386	-542.379	0	0	count	0
48094	AC092958.2	0	AC092958.2	FAIL	(Intercept)	-27.3	0.0503386	-542.379	0	0	count	0
48097	AC092958.3	0	AC092958.3	FAIL	(Intercept)	-27.3	0.0503386	-542.379	0	0	count	0
48100	AC092958.4	0	AC092958.4	FAIL	(Intercept)	-27.3	0.0503386	-542.379	0	0	count	0
48106	AC092994.1	0	AC092994.1	FAIL	(Intercept)	-27.3	0.0503386	-542.379	0	0	count	0
48109	AC093004.1	0	AC093004.1	FAIL	(Intercept)	-27.3	0.0503386	-542.379	0	0	count	0
48112	AC093010.2	0	AC093010.2	FAIL	(Intercept)	-27.3	0.0503386	-542.379	0	0	count	0
48115	AC093110.1	0	AC093110.1	FAIL	(Intercept)	-27.3	0.0503386	-542.379	0	0	count	0
48121	AC093298.1	0	AC093298.1	FAIL	(Intercept)	-27.3	0.0503386	-542.379	0	0	count	0
48124	AC093305.1	0	AC093305.1	FAIL	(Intercept)	-27.3	0.0503386	-542.379	0	0	count	0
48127	AC093311.1	0	AC093311.1	FAIL	(Intercept)	-27.3	0.0503386	-542.379	0	0	count	0
48130	AC093414.1	0	AC093414.1	FAIL	(Intercept)	-27.3	0.0503386	-542.379	0	0	count	0
48136	AC093459.1	0	AC093459.1	FAIL	(Intercept)	-27.3	0.0503386	-542.379	0	0	count	0
48142	AC093523.1	0	AC093523.1	FAIL	(Intercept)	-27.3	0.0503386	-542.379	0	0	count	0
48145	AC093525.2	0	AC093525.2	FAIL	(Intercept)	-27.3	0.0503386	-542.379	0	0	count	0
48148	AC093599.1	0	AC093599.1	FAIL	(Intercept)	-27.3	0.0503386	-542.379	0	0	count	0
48151	AC093607.1	0	AC093607.1	FAIL	(Intercept)	-27.3	0.0503386	-542.379	0	0	count	0
48154	AC093627.7	0	AC093627.7	FAIL	(Intercept)	-27.3	0.0503386	-542.379	0	0	count	0
48163	AC093722.1	0	AC093722.1	FAIL	(Intercept)	-27.3	0.0503386	-542.379	0	0	count	0
48169	AC093772.1	0	AC093772.1	FAIL	(Intercept)	-27.3	0.0503386	-542.379	0	0	count	0
48172	AC093788.1	0	AC093788.1	FAIL	(Intercept)	-27.3	0.0503386	-542.379	0	0	count	0
48175	AC093791.1	0	AC093791.1	FAIL	(Intercept)	-27.3	0.0503386	-542.379	0	0	count	0
48178	AC093799.1	0	AC093799.1	FAIL	(Intercept)	-27.3	0.0503386	-542.379	0	0	count	0
48181	AC093802.1	0	AC093802.1	FAIL	(Intercept)	-27.3	0.0503386	-542.379	0	0	count	0
48190	AC093857.1	0	AC093857.1	FAIL	(Intercept)	-27.3	0.0503386	-542.379	0	0	count	0
48193	AC093893.1	0	AC093893.1	FAIL	(Intercept)	-27.3	0.0503386	-542.379	0	0	count	0
48196	AC093894.2	0	AC093894.2	FAIL	(Intercept)	-27.3	0.0503386	-542.379	0	0	count	0
48199	AC095050.1	0	AC095050.1	FAIL	(Intercept)	-27.3	0.0503386	-542.379	0	0	count	0
48202	AC095050.2	0	AC095050.2	FAIL	(Intercept)	-27.3	0.0503386	-542.379	0	0	count	0
48214	AC096639.1	0	AC096639.1	FAIL	(Intercept)	-27.3	0.0503386	-542.379	0	0	count	0
48217	AC096666.1	0	AC096666.1	FAIL	(Intercept)	-27.3	0.0503386	-542.379	0	0	count	0
48220	AC096669.1	0	AC096669.1	FAIL	(Intercept)	-27.3	0.0503386	-542.379	0	0	count	0
48223	AC096733.2	0	AC096733.2	FAIL	(Intercept)	-27.3	0.0503386	-542.379	0	0	count	0
48226	AC096741.1	0	AC096741.1	FAIL	(Intercept)	-27.3	0.0503386	-542.379	0	0	count	0
48229	AC096759.1	0	AC096759.1	FAIL	(Intercept)	-27.3	0.0503386	-542.379	0	0	count	0
48232	AC096760.1	0	AC096760.1	FAIL	(Intercept)	-27.3	0.0503386	-542.379	0	0	count	0
48235	AC096773.1	0	AC096773.1	FAIL	(Intercept)	-27.3	0.0503386	-542.379	0	0	count	0
48238	AC097059.1	0	AC097059.1	FAIL	(Intercept)	-27.3	0.0503386	-542.379	0	0	count	0
48241	AC097375.1	0	AC097375.1	FAIL	(Intercept)	-27.3	0.0503386	-542.379	0	0	count	0
48250	AC097467.1	0	AC097467.1	FAIL	(Intercept)	-27.3	0.0503386	-542.379	0	0	count	0
48256	AC097478.1	0	AC097478.1	FAIL	(Intercept)	-27.3	0.0503386	-542.379	0	0	count	0
48259	AC097480.1	0	AC097480.1	FAIL	(Intercept)	-27.3	0.0503386	-542.379	0	0	count	0
48262	AC097487.1	0	AC097487.1	FAIL	(Intercept)	-27.3	0.0503386	-542.379	0	0	count	0
48268	AC097521.1	0	AC097521.1	FAIL	(Intercept)	-27.3	0.0503386	-542.379	0	0	count	0
48271	AC097626.1	0	AC097626.1	FAIL	(Intercept)	-27.3	0.0503386	-542.379	0	0	count	0
48274	AC097636.2	0	AC097636.2	FAIL	(Intercept)	-27.3	0.0503386	-542.379	0	0	count	0
48283	AC097717.1	0	AC097717.1	FAIL	(Intercept)	-27.3	0.0503386	-542.379	0	0	count	0
48289	AC098583.1	0	AC098583.1	FAIL	(Intercept)	-27.3	0.0503386	-542.379	0	0	count	0
48292	AC098591.1	0	AC098591.1	FAIL	(Intercept)	-27.3	0.0503386	-542.379	0	0	count	0
48295	AC098613.1	0	AC098613.1	FAIL	(Intercept)	-27.3	0.0503386	-542.379	0	0	count	0
48298	AC098679.1	0	AC098679.1	FAIL	(Intercept)	-27.3	0.0503386	-542.379	0	0	count	0
48301	AC098817.1	0	AC098817.1	FAIL	(Intercept)	-27.3	0.0503386	-542.379	0	0	count	0
48304	AC098818.2	0	AC098818.2	FAIL	(Intercept)	-27.3	0.0503386	-542.379	0	0	count	0
48307	AC098935.1	0	AC098935.1	FAIL	(Intercept)	-27.3	0.0503386	-542.379	0	0	count	0
48313	AC099062.1	0	AC099062.1	FAIL	(Intercept)	-27.3	0.0503386	-542.379	0	0	count	0
48316	AC099063.2	0	AC099063.2	FAIL	(Intercept)	-27.3	0.0503386	-542.379	0	0	count	0
48322	AC099340.1	0	AC099340.1	FAIL	(Intercept)	-27.3	0.0503386	-542.379	0	0	count	0
48325	AC099342.1	0	AC099342.1	FAIL	(Intercept)	-27.3	0.0503386	-542.379	0	0	count	0
48328	AC099509.2	0	AC099509.2	FAIL	(Intercept)	-27.3	0.0503386	-542.379	0	0	count	0
48331	AC099511.1	0	AC099511.1	FAIL	(Intercept)	-27.3	0.0503386	-542.379	0	0	count	0
48334	AC099513.1	0	AC099513.1	FAIL	(Intercept)	-27.3	0.0503386	-542.379	0	0	count	0
48337	AC099518.1	0	AC099518.1	FAIL	(Intercept)	-27.3	0.0503386	-542.379	0	0	count	0
48340	AC099518.3	0	AC099518.3	FAIL	(Intercept)	-27.3	0.0503386	-542.379	0	0	count	0
48343	AC099518.5	0	AC099518.5	FAIL	(Intercept)	-27.3	0.0503386	-542.379	0	0	count	0
48346	AC099522.1	0	AC099522.1	FAIL	(Intercept)	-27.3	0.0503386	-542.379	0	0	count	0
48349	AC099524.1	0	AC099524.1	FAIL	(Intercept)	-27.3	0.0503386	-542.379	0	0	count	0
48358	AC099560.1	0	AC099560.1	FAIL	(Intercept)	-27.3	0.0503386	-542.379	0	0	count	0
48364	AC099567.1	0	AC099567.1	FAIL	(Intercept)	-27.3	0.0503386	-542.379	0	0	count	0
48367	AC099654.1	0	AC099654.1	FAIL	(Intercept)	-27.3	0.0503386	-542.379	0	0	count	0
48370	AC099654.9	0	AC099654.9	FAIL	(Intercept)	-27.3	0.0503386	-542.379	0	0	count	0
48373	AC099671.1	0	AC099671.1	FAIL	(Intercept)	-27.3	0.0503386	-542.379	0	0	count	0
48376	AC099673.1	0	AC099673.1	FAIL	(Intercept)	-27.3	0.0503386	-542.379	0	0	count	0
48379	AC099753.1	0	AC099753.1	FAIL	(Intercept)	-27.3	0.0503386	-542.379	0	0	count	0
48382	AC099788.1	0	AC099788.1	FAIL	(Intercept)	-27.3	0.0503386	-542.379	0	0	count	0
48385	AC099791.2	0	AC099791.2	FAIL	(Intercept)	-27.3	0.0503386	-542.379	0	0	count	0
48391	AC099796.1	0	AC099796.1	FAIL	(Intercept)	-27.3	0.0503386	-542.379	0	0	count	0
48394	AC100768.1	0	AC100768.1	FAIL	(Intercept)	-27.3	0.0503386	-542.379	0	0	count	0
48400	AC100778.2	0	AC100778.2	FAIL	(Intercept)	-27.3	0.0503386	-542.379	0	0	count	0
48403	AC100800.1	0	AC100800.1	FAIL	(Intercept)	-27.3	0.0503386	-542.379	0	0	count	0
48406	AC100810.3	0	AC100810.3	FAIL	(Intercept)	-27.3	0.0503386	-542.379	0	0	count	0
48409	AC100818.1	0	AC100818.1	FAIL	(Intercept)	-27.3	0.0503386	-542.379	0	0	count	0
48412	AC100821.1	0	AC100821.1	FAIL	(Intercept)	-27.3	0.0503386	-542.379	0	0	count	0
48415	AC100822.1	0	AC100822.1	FAIL	(Intercept)	-27.3	0.0503386	-542.379	0	0	count	0
48418	AC100843.1	0	AC100843.1	FAIL	(Intercept)	-27.3	0.0503386	-542.379	0	0	count	0
48421	AC100858.3	0	AC100858.3	FAIL	(Intercept)	-27.3	0.0503386	-542.379	0	0	count	0
48424	AC100863.1	0	AC100863.1	FAIL	(Intercept)	-27.3	0.0503386	-542.379	0	0	count	0
48436	AC103691.1	0	AC103691.1	FAIL	(Intercept)	-27.3	0.0503386	-542.379	0	0	count	0
48442	AC103718.1	0	AC103718.1	FAIL	(Intercept)	-27.3	0.0503386	-542.379	0	0	count	0
48445	AC103796.1	0	AC103796.1	FAIL	(Intercept)	-27.3	0.0503386	-542.379	0	0	count	0
48448	AC103874.1	0	AC103874.1	FAIL	(Intercept)	-27.3	0.0503386	-542.379	0	0	count	0
48451	AC103876.1	0	AC103876.1	FAIL	(Intercept)	-27.3	0.0503386	-542.379	0	0	count	0
48454	AC103974.1	0	AC103974.1	FAIL	(Intercept)	-27.3	0.0503386	-542.379	0	0	count	0
48457	AC103993.1	0	AC103993.1	FAIL	(Intercept)	-27.3	0.0503386	-542.379	0	0	count	0
48463	AC104041.1	0	AC104041.1	FAIL	(Intercept)	-27.3	0.0503386	-542.379	0	0	count	0
48466	AC104066.2	0	AC104066.2	FAIL	(Intercept)	-27.3	0.0503386	-542.379	0	0	count	0
48478	AC104248.1	0	AC104248.1	FAIL	(Intercept)	-27.3	0.0503386	-542.379	0	0	count	0
48487	AC104370.1	0	AC104370.1	FAIL	(Intercept)	-27.3	0.0503386	-542.379	0	0	count	0
48490	AC104389.5	0	AC104389.5	FAIL	(Intercept)	-27.3	0.0503386	-542.379	0	0	count	0
48505	AC104623.1	0	AC104623.1	FAIL	(Intercept)	-27.3	0.0503386	-542.379	0	0	count	0
48508	AC104663.1	0	AC104663.1	FAIL	(Intercept)	-27.3	0.0503386	-542.379	0	0	count	0
48511	AC104667.1	0	AC104667.1	FAIL	(Intercept)	-27.3	0.0503386	-542.379	0	0	count	0
48517	AC104777.1	0	AC104777.1	FAIL	(Intercept)	-27.3	0.0503386	-542.379	0	0	count	0
48520	AC104794.2	0	AC104794.2	FAIL	(Intercept)	-27.3	0.0503386	-542.379	0	0	count	0
48523	AC104958.1	0	AC104958.1	FAIL	(Intercept)	-27.3	0.0503386	-542.379	0	0	count	0
48526	AC105001.1	0	AC105001.1	FAIL	(Intercept)	-27.3	0.0503386	-542.379	0	0	count	0
48529	AC105031.2	0	AC105031.2	FAIL	(Intercept)	-27.3	0.0503386	-542.379	0	0	count	0
48535	AC105114.2	0	AC105114.2	FAIL	(Intercept)	-27.3	0.0503386	-542.379	0	0	count	0
48538	AC105180.1	0	AC105180.1	FAIL	(Intercept)	-27.3	0.0503386	-542.379	0	0	count	0
48541	AC105213.1	0	AC105213.1	FAIL	(Intercept)	-27.3	0.0503386	-542.379	0	0	count	0
48544	AC105389.3	0	AC105389.3	FAIL	(Intercept)	-27.3	0.0503386	-542.379	0	0	count	0
48553	AC105460.2	0	AC105460.2	FAIL	(Intercept)	-27.3	0.0503386	-542.379	0	0	count	0
48556	AC105919.1	0	AC105919.1	FAIL	(Intercept)	-27.3	0.0503386	-542.379	0	0	count	0
48562	AC106771.1	0	AC106771.1	FAIL	(Intercept)	-27.3	0.0503386	-542.379	0	0	count	0
48565	AC106795.3	0	AC106795.3	FAIL	(Intercept)	-27.3	0.0503386	-542.379	0	0	count	0
48568	AC106798.1	0	AC106798.1	FAIL	(Intercept)	-27.3	0.0503386	-542.379	0	0	count	0
48577	AC106865.1	0	AC106865.1	FAIL	(Intercept)	-27.3	0.0503386	-542.379	0	0	count	0
48580	AC106894.1	0	AC106894.1	FAIL	(Intercept)	-27.3	0.0503386	-542.379	0	0	count	0
48592	AC107029.2	0	AC107029.2	FAIL	(Intercept)	-27.3	0.0503386	-542.379	0	0	count	0
48595	AC107032.2	0	AC107032.2	FAIL	(Intercept)	-27.3	0.0503386	-542.379	0	0	count	0
48598	AC107068.2	0	AC107068.2	FAIL	(Intercept)	-27.3	0.0503386	-542.379	0	0	count	0
48601	AC107072.1	0	AC107072.1	FAIL	(Intercept)	-27.3	0.0503386	-542.379	0	0	count	0
48604	AC107081.2	0	AC107081.2	FAIL	(Intercept)	-27.3	0.0503386	-542.379	0	0	count	0
48607	AC107241.1	0	AC107241.1	FAIL	(Intercept)	-27.3	0.0503386	-542.379	0	0	count	0
48610	AC107396.1	0	AC107396.1	FAIL	(Intercept)	-27.3	0.0503386	-542.379	0	0	count	0
48613	AC107419.1	0	AC107419.1	FAIL	(Intercept)	-27.3	0.0503386	-542.379	0	0	count	0
48616	AC107463.1	0	AC107463.1	FAIL	(Intercept)	-27.3	0.0503386	-542.379	0	0	count	0
48619	AC107959.1	0	AC107959.1	FAIL	(Intercept)	-27.3	0.0503386	-542.379	0	0	count	0
48622	AC107959.4	0	AC107959.4	FAIL	(Intercept)	-27.3	0.0503386	-542.379	0	0	count	0
48625	AC107959.5	0	AC107959.5	FAIL	(Intercept)	-27.3	0.0503386	-542.379	0	0	count	0
48628	AC107973.1	0	AC107973.1	FAIL	(Intercept)	-27.3	0.0503386	-542.379	0	0	count	0
48631	AC108025.1	0	AC108025.1	FAIL	(Intercept)	-27.3	0.0503386	-542.379	0	0	count	0
48637	AC108449.1	0	AC108449.1	FAIL	(Intercept)	-27.3	0.0503386	-542.379	0	0	count	0
48640	AC108517.1	0	AC108517.1	FAIL	(Intercept)	-27.3	0.0503386	-542.379	0	0	count	0
48643	AC108718.1	0	AC108718.1	FAIL	(Intercept)	-27.3	0.0503386	-542.379	0	0	count	0
48649	AC108749.1	0	AC108749.1	FAIL	(Intercept)	-27.3	0.0503386	-542.379	0	0	count	0
48655	AC109349.1	0	AC109349.1	FAIL	(Intercept)	-27.3	0.0503386	-542.379	0	0	count	0
48661	AC109441.1	0	AC109441.1	FAIL	(Intercept)	-27.3	0.0503386	-542.379	0	0	count	0
48664	AC109462.1	0	AC109462.1	FAIL	(Intercept)	-27.3	0.0503386	-542.379	0	0	count	0
48667	AC109830.1	0	AC109830.1	FAIL	(Intercept)	-27.3	0.0503386	-542.379	0	0	count	0
48673	AC110058.1	0	AC110058.1	FAIL	(Intercept)	-27.3	0.0503386	-542.379	0	0	count	0
48676	AC110491.2	0	AC110491.2	FAIL	(Intercept)	-27.3	0.0503386	-542.379	0	0	count	0
48679	AC110741.1	0	AC110741.1	FAIL	(Intercept)	-27.3	0.0503386	-542.379	0	0	count	0
48682	AC110769.3	0	AC110769.3	FAIL	(Intercept)	-27.3	0.0503386	-542.379	0	0	count	0
48688	AC110772.2	0	AC110772.2	FAIL	(Intercept)	-27.3	0.0503386	-542.379	0	0	count	0
48691	AC110795.1	0	AC110795.1	FAIL	(Intercept)	-27.3	0.0503386	-542.379	0	0	count	0
48694	AC110992.1	0	AC110992.1	FAIL	(Intercept)	-27.3	0.0503386	-542.379	0	0	count	0
48697	AC110995.1	0	AC110995.1	FAIL	(Intercept)	-27.3	0.0503386	-542.379	0	0	count	0
48700	AC111006.1	0	AC111006.1	FAIL	(Intercept)	-27.3	0.0503386	-542.379	0	0	count	0
48709	AC112198.2	1	AC112198.2	FAIL	(Intercept)	-27.3	0.0503386	-542.379	0	0	count	0
48712	AC112243.1	0	AC112243.1	FAIL	(Intercept)	-27.3	0.0503386	-542.379	0	0	count	0
48718	AC112496.1	0	AC112496.1	FAIL	(Intercept)	-27.3	0.0503386	-542.379	0	0	count	0
48724	AC113145.1	0	AC113145.1	FAIL	(Intercept)	-27.3	0.0503386	-542.379	0	0	count	0
48727	AC113167.1	0	AC113167.1	FAIL	(Intercept)	-27.3	0.0503386	-542.379	0	0	count	0
48733	AC113346.2	0	AC113346.2	FAIL	(Intercept)	-27.3	0.0503386	-542.379	0	0	count	0
48736	AC113347.4	0	AC113347.4	FAIL	(Intercept)	-27.3	0.0503386	-542.379	0	0	count	0
48739	AC113378.1	0	AC113378.1	FAIL	(Intercept)	-27.3	0.0503386	-542.379	0	0	count	0
48742	AC113404.1	0	AC113404.1	FAIL	(Intercept)	-27.3	0.0503386	-542.379	0	0	count	0
48745	AC113418.1	0	AC113418.1	FAIL	(Intercept)	-27.3	0.0503386	-542.379	0	0	count	0
48748	AC114284.1	0	AC114284.1	FAIL	(Intercept)	-27.3	0.0503386	-542.379	0	0	count	0
48754	AC114321.1	0	AC114321.1	FAIL	(Intercept)	-27.3	0.0503386	-542.379	0	0	count	0
48757	AC114400.1	0	AC114400.1	FAIL	(Intercept)	-27.3	0.0503386	-542.379	0	0	count	0
48769	AC114930.1	0	AC114930.1	FAIL	(Intercept)	-27.3	0.0503386	-542.379	0	0	count	0
48772	AC114947.1	0	AC114947.1	FAIL	(Intercept)	-27.3	0.0503386	-542.379	0	0	count	0
48775	AC114954.1	0	AC114954.1	FAIL	(Intercept)	-27.3	0.0503386	-542.379	0	0	count	0
48781	AC116003.1	0	AC116003.1	FAIL	(Intercept)	-27.3	0.0503386	-542.379	0	0	count	0
48784	AC116049.1	0	AC116049.1	FAIL	(Intercept)	-27.3	0.0503386	-542.379	0	0	count	0
48787	AC116049.2	0	AC116049.2	FAIL	(Intercept)	-27.3	0.0503386	-542.379	0	0	count	0
48790	AC116337.3	0	AC116337.3	FAIL	(Intercept)	-27.3	0.0503386	-542.379	0	0	count	0
48793	AC116345.1	0	AC116345.1	FAIL	(Intercept)	-27.3	0.0503386	-542.379	0	0	count	0
48796	AC116353.1	0	AC116353.1	FAIL	(Intercept)	-27.3	0.0503386	-542.379	0	0	count	0
48799	AC116353.4	0	AC116353.4	FAIL	(Intercept)	-27.3	0.0503386	-542.379	0	0	count	0
48802	AC116353.5	0	AC116353.5	FAIL	(Intercept)	-27.3	0.0503386	-542.379	0	0	count	0
48808	AC116424.1	0	AC116424.1	FAIL	(Intercept)	-27.3	0.0503386	-542.379	0	0	count	0
48811	AC116616.1	0	AC116616.1	FAIL	(Intercept)	-27.3	0.0503386	-542.379	0	0	count	0
48814	AC116666.1	0	AC116666.1	FAIL	(Intercept)	-27.3	0.0503386	-542.379	0	0	count	0
48817	AC116667.1	0	AC116667.1	FAIL	(Intercept)	-27.3	0.0503386	-542.379	0	0	count	0
48826	AC117383.1	0	AC117383.1	FAIL	(Intercept)	-27.3	0.0503386	-542.379	0	0	count	0
48829	AC117386.1	0	AC117386.1	FAIL	(Intercept)	-27.3	0.0503386	-542.379	0	0	count	0
48832	AC117386.2	0	AC117386.2	FAIL	(Intercept)	-27.3	0.0503386	-542.379	0	0	count	0
48838	AC117460.1	0	AC117460.1	FAIL	(Intercept)	-27.3	0.0503386	-542.379	0	0	count	0
48841	AC117465.1	0	AC117465.1	FAIL	(Intercept)	-27.3	0.0503386	-542.379	0	0	count	0
48844	AC117473.1	0	AC117473.1	FAIL	(Intercept)	-27.3	0.0503386	-542.379	0	0	count	0
48850	AC117834.1	0	AC117834.1	FAIL	(Intercept)	-27.3	0.0503386	-542.379	0	0	count	0
48853	AC118942.1	0	AC118942.1	FAIL	(Intercept)	-27.3	0.0503386	-542.379	0	0	count	0
48856	AC119044.1	0	AC119044.1	FAIL	(Intercept)	-27.3	0.0503386	-542.379	0	0	count	0
48862	AC119428.2	0	AC119428.2	FAIL	(Intercept)	-27.3	0.0503386	-542.379	0	0	count	0
48865	AC119751.1	0	AC119751.1	FAIL	(Intercept)	-27.3	0.0503386	-542.379	0	0	count	0
48874	AC121154.1	0	AC121154.1	FAIL	(Intercept)	-27.3	0.0503386	-542.379	0	0	count	0
48877	AC121764.2	0	AC121764.2	FAIL	(Intercept)	-27.3	0.0503386	-542.379	0	0	count	0
48880	AC122685.1	0	AC122685.1	FAIL	(Intercept)	-27.3	0.0503386	-542.379	0	0	count	0
48886	AC123777.1	0	AC123777.1	FAIL	(Intercept)	-27.3	0.0503386	-542.379	0	0	count	0
48889	AC124017.1	0	AC124017.1	FAIL	(Intercept)	-27.3	0.0503386	-542.379	0	0	count	0
48895	AC124254.1	0	AC124254.1	FAIL	(Intercept)	-27.3	0.0503386	-542.379	0	0	count	0
48898	AC124290.1	0	AC124290.1	FAIL	(Intercept)	-27.3	0.0503386	-542.379	0	0	count	0
48907	AC126177.3	0	AC126177.3	FAIL	(Intercept)	-27.3	0.0503386	-542.379	0	0	count	0
48910	AC126178.1	0	AC126178.1	FAIL	(Intercept)	-27.3	0.0503386	-542.379	0	0	count	0
48913	AC126615.1	0	AC126615.1	FAIL	(Intercept)	-27.3	0.0503386	-542.379	0	0	count	0
48916	AC126696.1	0	AC126696.1	FAIL	(Intercept)	-27.3	0.0503386	-542.379	0	0	count	0
48922	AC127164.1	0	AC127164.1	FAIL	(Intercept)	-27.3	0.0503386	-542.379	0	0	count	0
48925	AC127521.1	0	AC127521.1	FAIL	(Intercept)	-27.3	0.0503386	-542.379	0	0	count	0
48928	AC127526.2	0	AC127526.2	FAIL	(Intercept)	-27.3	0.0503386	-542.379	0	0	count	0
48931	AC127526.3	0	AC127526.3	FAIL	(Intercept)	-27.3	0.0503386	-542.379	0	0	count	0
48940	AC129507.1	0	AC129507.1	FAIL	(Intercept)	-27.3	0.0503386	-542.379	0	0	count	0
48943	AC129926.2	0	AC129926.2	FAIL	(Intercept)	-27.3	0.0503386	-542.379	0	0	count	0
48946	AC130304.1	0	AC130304.1	FAIL	(Intercept)	-27.3	0.0503386	-542.379	0	0	count	0
48949	AC130415.1	0	AC130415.1	FAIL	(Intercept)	-27.3	0.0503386	-542.379	0	0	count	0
48952	AC130710.1	0	AC130710.1	FAIL	(Intercept)	-27.3	0.0503386	-542.379	0	0	count	0
48958	AC131254.1	0	AC131254.1	FAIL	(Intercept)	-27.3	0.0503386	-542.379	0	0	count	0
48961	AC131532.1	0	AC131532.1	FAIL	(Intercept)	-27.3	0.0503386	-542.379	0	0	count	0
48973	AC132872.4	0	AC132872.4	FAIL	(Intercept)	-27.3	0.0503386	-542.379	0	0	count	0
48976	AC133644.3	0	AC133644.3	FAIL	(Intercept)	-27.3	0.0503386	-542.379	0	0	count	0
48979	AC134878.2	0	AC134878.2	FAIL	(Intercept)	-27.3	0.0503386	-542.379	0	0	count	0
48994	AC136489.1	0	AC136489.1	FAIL	(Intercept)	-27.3	0.0503386	-542.379	0	0	count	0
49000	AC137579.1	0	AC137579.1	FAIL	(Intercept)	-27.3	0.0503386	-542.379	0	0	count	0
49006	AC137810.1	0	AC137810.1	FAIL	(Intercept)	-27.3	0.0503386	-542.379	0	0	count	0
49012	AC138123.2	0	AC138123.2	FAIL	(Intercept)	-27.3	0.0503386	-542.379	0	0	count	0
49015	AC138207.4	0	AC138207.4	FAIL	(Intercept)	-27.3	0.0503386	-542.379	0	0	count	0
49018	AC138207.5	0	AC138207.5	FAIL	(Intercept)	-27.3	0.0503386	-542.379	0	0	count	0
49027	AC138811.1	0	AC138811.1	FAIL	(Intercept)	-27.3	0.0503386	-542.379	0	0	count	0
49033	AC139491.7	0	AC139491.7	FAIL	(Intercept)	-27.3	0.0503386	-542.379	0	0	count	0
49036	AC139530.1	0	AC139530.1	FAIL	(Intercept)	-27.3	0.0503386	-542.379	0	0	count	0
49045	AC139769.2	0	AC139769.2	FAIL	(Intercept)	-27.3	0.0503386	-542.379	0	0	count	0
49048	AC139795.1	0	AC139795.1	FAIL	(Intercept)	-27.3	0.0503386	-542.379	0	0	count	0
49054	AC141930.1	0	AC141930.1	FAIL	(Intercept)	-27.3	0.0503386	-542.379	0	0	count	0
49057	AC142472.1	0	AC142472.1	FAIL	(Intercept)	-27.3	0.0503386	-542.379	0	0	count	0
49060	AC144836.1	0	AC144836.1	FAIL	(Intercept)	-27.3	0.0503386	-542.379	0	0	count	0
49063	AC145146.1	0	AC145146.1	FAIL	(Intercept)	-27.3	0.0503386	-542.379	0	0	count	0
49066	AC145207.2	0	AC145207.2	FAIL	(Intercept)	-27.3	0.0503386	-542.379	0	0	count	0
49072	AC147651.4	0	AC147651.4	FAIL	(Intercept)	-27.3	0.0503386	-542.379	0	0	count	0
49078	AC215217.1	0	AC215217.1	FAIL	(Intercept)	-27.3	0.0503386	-542.379	0	0	count	0
49081	AC226119.1	0	AC226119.1	FAIL	(Intercept)	-27.3	0.0503386	-542.379	0	0	count	0
49084	AC236972.3	0	AC236972.3	FAIL	(Intercept)	-27.3	0.0503386	-542.379	0	0	count	0
49087	AC239367.2	0	AC239367.2	FAIL	(Intercept)	-27.3	0.0503386	-542.379	0	0	count	0
49093	AC239798.1	0	AC239798.1	FAIL	(Intercept)	-27.3	0.0503386	-542.379	0	0	count	0
49096	AC241584.1	0	AC241584.1	FAIL	(Intercept)	-27.3	0.0503386	-542.379	0	0	count	0
49099	AC241584.2	0	AC241584.2	FAIL	(Intercept)	-27.3	0.0503386	-542.379	0	0	count	0
49102	AC242842.3	0	AC242842.3	FAIL	(Intercept)	-27.3	0.0503386	-542.379	0	0	count	0
49105	AC242843.1	0	AC242843.1	FAIL	(Intercept)	-27.3	0.0503386	-542.379	0	0	count	0
49108	AC242988.2	0	AC242988.2	FAIL	(Intercept)	-27.3	0.0503386	-542.379	0	0	count	0
49114	AC243829.1	0	AC243829.1	FAIL	(Intercept)	-27.3	0.0503386	-542.379	0	0	count	0
49117	AC243829.4	0	AC243829.4	FAIL	(Intercept)	-27.3	0.0503386	-542.379	0	0	count	0
49120	AC243960.1	0	AC243960.1	FAIL	(Intercept)	-27.3	0.0503386	-542.379	0	0	count	0
49123	AC243964.2	0	AC243964.2	FAIL	(Intercept)	-27.3	0.0503386	-542.379	0	0	count	0
49126	AC243967.1	0	AC243967.1	FAIL	(Intercept)	-27.3	0.0503386	-542.379	0	0	count	0
49129	AC244021.1	0	AC244021.1	FAIL	(Intercept)	-27.3	0.0503386	-542.379	0	0	count	0
49132	AC244205.1	0	AC244205.1	FAIL	(Intercept)	-27.3	0.0503386	-542.379	0	0	count	0
49144	AC244502.1	0	AC244502.1	FAIL	(Intercept)	-27.3	0.0503386	-542.379	0	0	count	0
49147	AC245054.1	0	AC245054.1	FAIL	(Intercept)	-27.3	0.0503386	-542.379	0	0	count	0
49153	AC245128.1	0	AC245128.1	FAIL	(Intercept)	-27.3	0.0503386	-542.379	0	0	count	0
49156	AC245128.3	0	AC245128.3	FAIL	(Intercept)	-27.3	0.0503386	-542.379	0	0	count	0
49159	AC245452.1	0	AC245452.1	FAIL	(Intercept)	-27.3	0.0503386	-542.379	0	0	count	0
49162	AC245748.2	0	AC245748.2	FAIL	(Intercept)	-27.3	0.0503386	-542.379	0	0	count	0
49165	AC245884.11	0	AC245884.11	FAIL	(Intercept)	-27.3	0.0503386	-542.379	0	0	count	0
49168	AC246817.1	0	AC246817.1	FAIL	(Intercept)	-27.3	0.0503386	-542.379	0	0	count	0
49171	AC246817.2	0	AC246817.2	FAIL	(Intercept)	-27.3	0.0503386	-542.379	0	0	count	0
49195	ACOXL-AS1	0	ACOXL-AS1	FAIL	(Intercept)	-27.3	0.0503386	-542.379	0	0	count	0
49198	ACPP	0	ACPP	FAIL	(Intercept)	-27.3	0.0503386	-542.379	0	0	count	0
49213	ACSM2A	0	ACSM2A	FAIL	(Intercept)	-27.3	0.0503386	-542.379	0	0	count	0
49219	ACTBP2	0	ACTBP2	FAIL	(Intercept)	-27.3	0.0503386	-542.379	0	0	count	0
49234	ADA2	0	ADA2	FAIL	(Intercept)	-27.3	0.0503386	-542.379	0	0	count	0
49237	ADAM18	0	ADAM18	FAIL	(Intercept)	-27.3	0.0503386	-542.379	0	0	count	0
49243	ADAM29	1	ADAM29	FAIL	(Intercept)	-27.3	0.0503386	-542.379	0	0	count	0
49246	ADAM7	1	ADAM7	FAIL	(Intercept)	-27.3	0.0503386	-542.379	0	0	count	0
49273	ADAMTS7P4	0	ADAMTS7P4	FAIL	(Intercept)	-27.3	0.0503386	-542.379	0	0	count	0
49279	ADAMTS9-AS1	2	ADAMTS9-AS1	FAIL	(Intercept)	-27.3	0.0503386	-542.379	0	0	count	0
49288	ADAMTSL4	0	ADAMTSL4	FAIL	(Intercept)	-27.3	0.0503386	-542.379	0	0	count	0
49321	ADGRE1	0	ADGRE1	FAIL	(Intercept)	-27.3	0.0503386	-542.379	0	0	count	0
49324	ADGRE4P	0	ADGRE4P	FAIL	(Intercept)	-27.3	0.0503386	-542.379	0	0	count	0
49327	ADGRF4	0	ADGRF4	FAIL	(Intercept)	-27.3	0.0503386	-542.379	0	0	count	0
49336	ADGRG3	0	ADGRG3	FAIL	(Intercept)	-27.3	0.0503386	-542.379	0	0	count	0
49339	ADGRG4	1	ADGRG4	FAIL	(Intercept)	-27.3	0.0503386	-542.379	0	0	count	0
49342	ADGRG7	0	ADGRG7	FAIL	(Intercept)	-27.3	0.0503386	-542.379	0	0	count	0
49345	ADGRL3-AS1	3	ADGRL3-AS1	FAIL	(Intercept)	-27.3	0.0503386	-542.379	0	0	count	0
49351	ADH1B	0	ADH1B	FAIL	(Intercept)	-27.3	0.0503386	-542.379	0	0	count	0
49354	ADH6	0	ADH6	FAIL	(Intercept)	-27.3	0.0503386	-542.379	0	0	count	0
49357	ADH7	0	ADH7	FAIL	(Intercept)	-27.3	0.0503386	-542.379	0	0	count	0
49360	ADIPOQ	1	ADIPOQ	FAIL	(Intercept)	-27.3	0.0503386	-542.379	0	0	count	0
49366	ADNP-AS1	2	ADNP-AS1	FAIL	(Intercept)	-27.3	0.0503386	-542.379	0	0	count	0
49399	AF015720.1	0	AF015720.1	FAIL	(Intercept)	-27.3	0.0503386	-542.379	0	0	count	0
49402	AF064858.1	0	AF064858.1	FAIL	(Intercept)	-27.3	0.0503386	-542.379	0	0	count	0
49405	AF107885.2	0	AF107885.2	FAIL	(Intercept)	-27.3	0.0503386	-542.379	0	0	count	0
49408	AF111167.1	0	AF111167.1	FAIL	(Intercept)	-27.3	0.0503386	-542.379	0	0	count	0
49411	AF117829.2	0	AF117829.2	FAIL	(Intercept)	-27.3	0.0503386	-542.379	0	0	count	0
49417	AF123462.1	0	AF123462.1	FAIL	(Intercept)	-27.3	0.0503386	-542.379	0	0	count	0
49420	AF130359.1	0	AF130359.1	FAIL	(Intercept)	-27.3	0.0503386	-542.379	0	0	count	0
49426	AF131215.3	0	AF131215.3	FAIL	(Intercept)	-27.3	0.0503386	-542.379	0	0	count	0
49429	AF228730.5	0	AF228730.5	FAIL	(Intercept)	-27.3	0.0503386	-542.379	0	0	count	0
49432	AF240627.1	0	AF240627.1	FAIL	(Intercept)	-27.3	0.0503386	-542.379	0	0	count	0
49435	AF241725.1	0	AF241725.1	FAIL	(Intercept)	-27.3	0.0503386	-542.379	0	0	count	0
49438	AF241728.1	0	AF241728.1	FAIL	(Intercept)	-27.3	0.0503386	-542.379	0	0	count	0
49450	AFP	0	AFP	FAIL	(Intercept)	-27.3	0.0503386	-542.379	0	0	count	0
49453	AGAP10P	0	AGAP10P	FAIL	(Intercept)	-27.3	0.0503386	-542.379	0	0	count	0
49459	AGAP7P	6	AGAP7P	FAIL	(Intercept)	-27.3	0.0503386	-542.379	0	0	count	0
49465	AGBL1-AS1	0	AGBL1-AS1	FAIL	(Intercept)	-27.3	0.0503386	-542.379	0	0	count	0
49471	AGBL4-IT1	1	AGBL4-IT1	FAIL	(Intercept)	-27.3	0.0503386	-542.379	0	0	count	0
49489	AJ006995.1	0	AJ006995.1	FAIL	(Intercept)	-27.3	0.0503386	-542.379	0	0	count	0
49495	AKAIN1	0	AKAIN1	FAIL	(Intercept)	-27.3	0.0503386	-542.379	0	0	count	0
49498	AKAP17BP	0	AKAP17BP	FAIL	(Intercept)	-27.3	0.0503386	-542.379	0	0	count	0
49501	AKAP4	0	AKAP4	FAIL	(Intercept)	-27.3	0.0503386	-542.379	0	0	count	0
49507	AKR1C5P	0	AKR1C5P	FAIL	(Intercept)	-27.3	0.0503386	-542.379	0	0	count	0
49519	AL009176.1	0	AL009176.1	FAIL	(Intercept)	-27.3	0.0503386	-542.379	0	0	count	0
49522	AL009178.3	0	AL009178.3	FAIL	(Intercept)	-27.3	0.0503386	-542.379	0	0	count	0
49528	AL021396.1	0	AL021396.1	FAIL	(Intercept)	-27.3	0.0503386	-542.379	0	0	count	0
49534	AL021707.6	0	AL021707.6	FAIL	(Intercept)	-27.3	0.0503386	-542.379	0	0	count	0
49540	AL022323.1	0	AL022323.1	FAIL	(Intercept)	-27.3	0.0503386	-542.379	0	0	count	0
49543	AL022337.1	0	AL022337.1	FAIL	(Intercept)	-27.3	0.0503386	-542.379	0	0	count	0
49546	AL023284.3	0	AL023284.3	FAIL	(Intercept)	-27.3	0.0503386	-542.379	0	0	count	0
49549	AL023574.1	0	AL023574.1	FAIL	(Intercept)	-27.3	0.0503386	-542.379	0	0	count	0
49552	AL023653.1	0	AL023653.1	FAIL	(Intercept)	-27.3	0.0503386	-542.379	0	0	count	0
49555	AL023755.1	0	AL023755.1	FAIL	(Intercept)	-27.3	0.0503386	-542.379	0	0	count	0
49561	AL031056.2	0	AL031056.2	FAIL	(Intercept)	-27.3	0.0503386	-542.379	0	0	count	0
49564	AL031123.1	0	AL031123.1	FAIL	(Intercept)	-27.3	0.0503386	-542.379	0	0	count	0
49573	AL031590.1	0	AL031590.1	FAIL	(Intercept)	-27.3	0.0503386	-542.379	0	0	count	0
49576	AL031772.1	0	AL031772.1	FAIL	(Intercept)	-27.3	0.0503386	-542.379	0	0	count	0
49579	AL031985.2	0	AL031985.2	FAIL	(Intercept)	-27.3	0.0503386	-542.379	0	0	count	0
49585	AL033380.1	0	AL033380.1	FAIL	(Intercept)	-27.3	0.0503386	-542.379	0	0	count	0
49588	AL033397.1	0	AL033397.1	FAIL	(Intercept)	-27.3	0.0503386	-542.379	0	0	count	0
49594	AL033530.1	0	AL033530.1	FAIL	(Intercept)	-27.3	0.0503386	-542.379	0	0	count	0
49597	AL034347.1	0	AL034347.1	FAIL	(Intercept)	-27.3	0.0503386	-542.379	0	0	count	0
49600	AL034397.2	0	AL034397.2	FAIL	(Intercept)	-27.3	0.0503386	-542.379	0	0	count	0
49603	AL034397.3	0	AL034397.3	FAIL	(Intercept)	-27.3	0.0503386	-542.379	0	0	count	0
49609	AL034428.1	0	AL034428.1	FAIL	(Intercept)	-27.3	0.0503386	-542.379	0	0	count	0
49612	AL035071.2	0	AL035071.2	FAIL	(Intercept)	-27.3	0.0503386	-542.379	0	0	count	0
49618	AL035425.2	0	AL035425.2	FAIL	(Intercept)	-27.3	0.0503386	-542.379	0	0	count	0
49621	AL035446.1	0	AL035446.1	FAIL	(Intercept)	-27.3	0.0503386	-542.379	0	0	count	0
49630	AL035587.1	0	AL035587.1	FAIL	(Intercept)	-27.3	0.0503386	-542.379	0	0	count	0
49633	AL035634.1	0	AL035634.1	FAIL	(Intercept)	-27.3	0.0503386	-542.379	0	0	count	0
49639	AL035660.2	0	AL035660.2	FAIL	(Intercept)	-27.3	0.0503386	-542.379	0	0	count	0
49642	AL049629.2	0	AL049629.2	FAIL	(Intercept)	-27.3	0.0503386	-542.379	0	0	count	0
49645	AL049649.1	0	AL049649.1	FAIL	(Intercept)	-27.3	0.0503386	-542.379	0	0	count	0
49648	AL049812.2	0	AL049812.2	FAIL	(Intercept)	-27.3	0.0503386	-542.379	0	0	count	0
49651	AL049820.1	0	AL049820.1	FAIL	(Intercept)	-27.3	0.0503386	-542.379	0	0	count	0
49654	AL049825.1	0	AL049825.1	FAIL	(Intercept)	-27.3	0.0503386	-542.379	0	0	count	0
49657	AL049828.2	0	AL049828.2	FAIL	(Intercept)	-27.3	0.0503386	-542.379	0	0	count	0
49660	AL049830.1	0	AL049830.1	FAIL	(Intercept)	-27.3	0.0503386	-542.379	0	0	count	0
49672	AL049874.2	0	AL049874.2	FAIL	(Intercept)	-27.3	0.0503386	-542.379	0	0	count	0
49675	AL050331.1	0	AL050331.1	FAIL	(Intercept)	-27.3	0.0503386	-542.379	0	0	count	0
49684	AL080273.1	0	AL080273.1	FAIL	(Intercept)	-27.3	0.0503386	-542.379	0	0	count	0
49693	AL096772.1	0	AL096772.1	FAIL	(Intercept)	-27.3	0.0503386	-542.379	0	0	count	0
49696	AL096865.1	0	AL096865.1	FAIL	(Intercept)	-27.3	0.0503386	-542.379	0	0	count	0
49699	AL096870.1	0	AL096870.1	FAIL	(Intercept)	-27.3	0.0503386	-542.379	0	0	count	0
49708	AL109804.1	0	AL109804.1	FAIL	(Intercept)	-27.3	0.0503386	-542.379	0	0	count	0
49711	AL109809.4	0	AL109809.4	FAIL	(Intercept)	-27.3	0.0503386	-542.379	0	0	count	0
49714	AL109947.1	0	AL109947.1	FAIL	(Intercept)	-27.3	0.0503386	-542.379	0	0	count	0
49717	AL117329.1	0	AL117329.1	FAIL	(Intercept)	-27.3	0.0503386	-542.379	0	0	count	0
49720	AL117339.1	0	AL117339.1	FAIL	(Intercept)	-27.3	0.0503386	-542.379	0	0	count	0
49723	AL118523.1	0	AL118523.1	FAIL	(Intercept)	-27.3	0.0503386	-542.379	0	0	count	0
49729	AL121578.3	0	AL121578.3	FAIL	(Intercept)	-27.3	0.0503386	-542.379	0	0	count	0
49732	AL121781.1	0	AL121781.1	FAIL	(Intercept)	-27.3	0.0503386	-542.379	0	0	count	0
49735	AL121790.1	0	AL121790.1	FAIL	(Intercept)	-27.3	0.0503386	-542.379	0	0	count	0
49738	AL121852.1	0	AL121852.1	FAIL	(Intercept)	-27.3	0.0503386	-542.379	0	0	count	0
49741	AL121871.1	0	AL121871.1	FAIL	(Intercept)	-27.3	0.0503386	-542.379	0	0	count	0
49744	AL121935.1	0	AL121935.1	FAIL	(Intercept)	-27.3	0.0503386	-542.379	0	0	count	0
49747	AL121956.1	0	AL121956.1	FAIL	(Intercept)	-27.3	0.0503386	-542.379	0	0	count	0
49753	AL121999.1	0	AL121999.1	FAIL	(Intercept)	-27.3	0.0503386	-542.379	0	0	count	0
49756	AL122019.1	0	AL122019.1	FAIL	(Intercept)	-27.3	0.0503386	-542.379	0	0	count	0
49759	AL132633.1	0	AL132633.1	FAIL	(Intercept)	-27.3	0.0503386	-542.379	0	0	count	0
49762	AL132655.3	0	AL132655.3	FAIL	(Intercept)	-27.3	0.0503386	-542.379	0	0	count	0
49765	AL132656.2	0	AL132656.2	FAIL	(Intercept)	-27.3	0.0503386	-542.379	0	0	count	0
49768	AL132719.1	0	AL132719.1	FAIL	(Intercept)	-27.3	0.0503386	-542.379	0	0	count	0
49771	AL132996.1	0	AL132996.1	FAIL	(Intercept)	-27.3	0.0503386	-542.379	0	0	count	0
49774	AL133166.1	0	AL133166.1	FAIL	(Intercept)	-27.3	0.0503386	-542.379	0	0	count	0
49780	AL133247.1	0	AL133247.1	FAIL	(Intercept)	-27.3	0.0503386	-542.379	0	0	count	0
49786	AL133260.1	0	AL133260.1	FAIL	(Intercept)	-27.3	0.0503386	-542.379	0	0	count	0
49789	AL133284.1	1	AL133284.1	FAIL	(Intercept)	-27.3	0.0503386	-542.379	0	0	count	0
49795	AL133372.2	0	AL133372.2	FAIL	(Intercept)	-27.3	0.0503386	-542.379	0	0	count	0
49798	AL133372.3	0	AL133372.3	FAIL	(Intercept)	-27.3	0.0503386	-542.379	0	0	count	0
49804	AL133464.1	0	AL133464.1	FAIL	(Intercept)	-27.3	0.0503386	-542.379	0	0	count	0
49813	AL135937.1	0	AL135937.1	FAIL	(Intercept)	-27.3	0.0503386	-542.379	0	0	count	0
49816	AL136018.1	0	AL136018.1	FAIL	(Intercept)	-27.3	0.0503386	-542.379	0	0	count	0
49819	AL136131.3	0	AL136131.3	FAIL	(Intercept)	-27.3	0.0503386	-542.379	0	0	count	0
49828	AL136234.1	0	AL136234.1	FAIL	(Intercept)	-27.3	0.0503386	-542.379	0	0	count	0
49834	AL136363.2	0	AL136363.2	FAIL	(Intercept)	-27.3	0.0503386	-542.379	0	0	count	0
49846	AL136501.1	0	AL136501.1	FAIL	(Intercept)	-27.3	0.0503386	-542.379	0	0	count	0
49849	AL136537.1	0	AL136537.1	FAIL	(Intercept)	-27.3	0.0503386	-542.379	0	0	count	0
49852	AL136962.1	0	AL136962.1	FAIL	(Intercept)	-27.3	0.0503386	-542.379	0	0	count	0
49858	AL137024.1	0	AL137024.1	FAIL	(Intercept)	-27.3	0.0503386	-542.379	0	0	count	0
49861	AL137058.1	0	AL137058.1	FAIL	(Intercept)	-27.3	0.0503386	-542.379	0	0	count	0
49864	AL137100.3	0	AL137100.3	FAIL	(Intercept)	-27.3	0.0503386	-542.379	0	0	count	0
49873	AL137186.2	0	AL137186.2	FAIL	(Intercept)	-27.3	0.0503386	-542.379	0	0	count	0
49876	AL137224.1	0	AL137224.1	FAIL	(Intercept)	-27.3	0.0503386	-542.379	0	0	count	0
49879	AL137789.1	0	AL137789.1	FAIL	(Intercept)	-27.3	0.0503386	-542.379	0	0	count	0
49882	AL137804.1	0	AL137804.1	FAIL	(Intercept)	-27.3	0.0503386	-542.379	0	0	count	0
49885	AL138694.1	0	AL138694.1	FAIL	(Intercept)	-27.3	0.0503386	-542.379	0	0	count	0
49888	AL138756.1	0	AL138756.1	FAIL	(Intercept)	-27.3	0.0503386	-542.379	0	0	count	0
49891	AL138760.1	0	AL138760.1	FAIL	(Intercept)	-27.3	0.0503386	-542.379	0	0	count	0
49894	AL138767.1	0	AL138767.1	FAIL	(Intercept)	-27.3	0.0503386	-542.379	0	0	count	0
49897	AL138767.3	0	AL138767.3	FAIL	(Intercept)	-27.3	0.0503386	-542.379	0	0	count	0
49900	AL138799.4	0	AL138799.4	FAIL	(Intercept)	-27.3	0.0503386	-542.379	0	0	count	0
49903	AL138828.1	0	AL138828.1	FAIL	(Intercept)	-27.3	0.0503386	-542.379	0	0	count	0
49909	AL138878.1	0	AL138878.1	FAIL	(Intercept)	-27.3	0.0503386	-542.379	0	0	count	0
49912	AL138902.1	0	AL138902.1	FAIL	(Intercept)	-27.3	0.0503386	-542.379	0	0	count	0
49918	AL138999.2	0	AL138999.2	FAIL	(Intercept)	-27.3	0.0503386	-542.379	0	0	count	0
49921	AL139023.1	0	AL139023.1	FAIL	(Intercept)	-27.3	0.0503386	-542.379	0	0	count	0
49927	AL139123.1	0	AL139123.1	FAIL	(Intercept)	-27.3	0.0503386	-542.379	0	0	count	0
49930	AL139142.1	0	AL139142.1	FAIL	(Intercept)	-27.3	0.0503386	-542.379	0	0	count	0
49933	AL139158.2	0	AL139158.2	FAIL	(Intercept)	-27.3	0.0503386	-542.379	0	0	count	0
49936	AL139184.1	0	AL139184.1	FAIL	(Intercept)	-27.3	0.0503386	-542.379	0	0	count	0
49939	AL139220.1	0	AL139220.1	FAIL	(Intercept)	-27.3	0.0503386	-542.379	0	0	count	0
49945	AL157359.1	0	AL157359.1	FAIL	(Intercept)	-27.3	0.0503386	-542.379	0	0	count	0
49948	AL157392.2	0	AL157392.2	FAIL	(Intercept)	-27.3	0.0503386	-542.379	0	0	count	0
49954	AL157756.1	0	AL157756.1	FAIL	(Intercept)	-27.3	0.0503386	-542.379	0	0	count	0
49957	AL157786.1	1	AL157786.1	FAIL	(Intercept)	-27.3	0.0503386	-542.379	0	0	count	0
49960	AL157829.1	0	AL157829.1	FAIL	(Intercept)	-27.3	0.0503386	-542.379	0	0	count	0
49963	AL157871.4	0	AL157871.4	FAIL	(Intercept)	-27.3	0.0503386	-542.379	0	0	count	0
49966	AL157911.1	0	AL157911.1	FAIL	(Intercept)	-27.3	0.0503386	-542.379	0	0	count	0
49969	AL157937.1	0	AL157937.1	FAIL	(Intercept)	-27.3	0.0503386	-542.379	0	0	count	0
49972	AL157938.2	0	AL157938.2	FAIL	(Intercept)	-27.3	0.0503386	-542.379	0	0	count	0
49975	AL158058.1	0	AL158058.1	FAIL	(Intercept)	-27.3	0.0503386	-542.379	0	0	count	0
49981	AL158071.1	0	AL158071.1	FAIL	(Intercept)	-27.3	0.0503386	-542.379	0	0	count	0
49984	AL158071.3	0	AL158071.3	FAIL	(Intercept)	-27.3	0.0503386	-542.379	0	0	count	0
49993	AL158206.1	0	AL158206.1	FAIL	(Intercept)	-27.3	0.0503386	-542.379	0	0	count	0
49999	AL158835.1	0	AL158835.1	FAIL	(Intercept)	-27.3	0.0503386	-542.379	0	0	count	0
50002	AL158850.1	0	AL158850.1	FAIL	(Intercept)	-27.3	0.0503386	-542.379	0	0	count	0
50011	AL160162.1	0	AL160162.1	FAIL	(Intercept)	-27.3	0.0503386	-542.379	0	0	count	0
50014	AL160191.2	0	AL160191.2	FAIL	(Intercept)	-27.3	0.0503386	-542.379	0	0	count	0
50017	AL160262.1	0	AL160262.1	FAIL	(Intercept)	-27.3	0.0503386	-542.379	0	0	count	0
50020	AL160272.1	0	AL160272.1	FAIL	(Intercept)	-27.3	0.0503386	-542.379	0	0	count	0
50023	AL160272.2	0	AL160272.2	FAIL	(Intercept)	-27.3	0.0503386	-542.379	0	0	count	0
50026	AL160287.1	0	AL160287.1	FAIL	(Intercept)	-27.3	0.0503386	-542.379	0	0	count	0
50029	AL160408.3	0	AL160408.3	FAIL	(Intercept)	-27.3	0.0503386	-542.379	0	0	count	0
50032	AL161616.2	0	AL161616.2	FAIL	(Intercept)	-27.3	0.0503386	-542.379	0	0	count	0
50035	AL161636.2	0	AL161636.2	FAIL	(Intercept)	-27.3	0.0503386	-542.379	0	0	count	0
50038	AL161668.3	0	AL161668.3	FAIL	(Intercept)	-27.3	0.0503386	-542.379	0	0	count	0
50041	AL161716.1	0	AL161716.1	FAIL	(Intercept)	-27.3	0.0503386	-542.379	0	0	count	0
50044	AL161725.1	0	AL161725.1	FAIL	(Intercept)	-27.3	0.0503386	-542.379	0	0	count	0
50047	AL161757.4	0	AL161757.4	FAIL	(Intercept)	-27.3	0.0503386	-542.379	0	0	count	0
50050	AL161757.5	0	AL161757.5	FAIL	(Intercept)	-27.3	0.0503386	-542.379	0	0	count	0
50053	AL161787.1	0	AL161787.1	FAIL	(Intercept)	-27.3	0.0503386	-542.379	0	0	count	0
50056	AL161912.1	0	AL161912.1	FAIL	(Intercept)	-27.3	0.0503386	-542.379	0	0	count	0
50059	AL162414.1	1	AL162414.1	FAIL	(Intercept)	-27.3	0.0503386	-542.379	0	0	count	0
50062	AL162424.1	0	AL162424.1	FAIL	(Intercept)	-27.3	0.0503386	-542.379	0	0	count	0
50068	AL162582.1	0	AL162582.1	FAIL	(Intercept)	-27.3	0.0503386	-542.379	0	0	count	0
50071	AL162718.1	0	AL162718.1	FAIL	(Intercept)	-27.3	0.0503386	-542.379	0	0	count	0
50074	AL162719.1	0	AL162719.1	FAIL	(Intercept)	-27.3	0.0503386	-542.379	0	0	count	0
50077	AL162724.1	0	AL162724.1	FAIL	(Intercept)	-27.3	0.0503386	-542.379	0	0	count	0
50080	AL163195.2	0	AL163195.2	FAIL	(Intercept)	-27.3	0.0503386	-542.379	0	0	count	0
50086	AL163952.1	0	AL163952.1	FAIL	(Intercept)	-27.3	0.0503386	-542.379	0	0	count	0
50089	AL353072.2	0	AL353072.2	FAIL	(Intercept)	-27.3	0.0503386	-542.379	0	0	count	0
50098	AL353586.1	0	AL353586.1	FAIL	(Intercept)	-27.3	0.0503386	-542.379	0	0	count	0
50101	AL353588.1	0	AL353588.1	FAIL	(Intercept)	-27.3	0.0503386	-542.379	0	0	count	0
50104	AL353604.1	0	AL353604.1	FAIL	(Intercept)	-27.3	0.0503386	-542.379	0	0	count	0
50110	AL353613.2	0	AL353613.2	FAIL	(Intercept)	-27.3	0.0503386	-542.379	0	0	count	0
50119	AL353633.1	0	AL353633.1	FAIL	(Intercept)	-27.3	0.0503386	-542.379	0	0	count	0
50122	AL353662.2	0	AL353662.2	FAIL	(Intercept)	-27.3	0.0503386	-542.379	0	0	count	0
50125	AL353678.1	0	AL353678.1	FAIL	(Intercept)	-27.3	0.0503386	-542.379	0	0	count	0
50128	AL353693.1	0	AL353693.1	FAIL	(Intercept)	-27.3	0.0503386	-542.379	0	0	count	0
50131	AL353759.1	0	AL353759.1	FAIL	(Intercept)	-27.3	0.0503386	-542.379	0	0	count	0
50137	AL353811.1	0	AL353811.1	FAIL	(Intercept)	-27.3	0.0503386	-542.379	0	0	count	0
50140	AL354702.1	0	AL354702.1	FAIL	(Intercept)	-27.3	0.0503386	-542.379	0	0	count	0
50143	AL354707.1	0	AL354707.1	FAIL	(Intercept)	-27.3	0.0503386	-542.379	0	0	count	0
50149	AL354754.1	0	AL354754.1	FAIL	(Intercept)	-27.3	0.0503386	-542.379	0	0	count	0
50152	AL354771.1	0	AL354771.1	FAIL	(Intercept)	-27.3	0.0503386	-542.379	0	0	count	0
50155	AL354794.2	0	AL354794.2	FAIL	(Intercept)	-27.3	0.0503386	-542.379	0	0	count	0
50161	AL354824.1	0	AL354824.1	FAIL	(Intercept)	-27.3	0.0503386	-542.379	0	0	count	0
50164	AL354861.2	0	AL354861.2	FAIL	(Intercept)	-27.3	0.0503386	-542.379	0	0	count	0
50167	AL354863.1	0	AL354863.1	FAIL	(Intercept)	-27.3	0.0503386	-542.379	0	0	count	0
50176	AL354989.1	0	AL354989.1	FAIL	(Intercept)	-27.3	0.0503386	-542.379	0	0	count	0
50182	AL354993.2	0	AL354993.2	FAIL	(Intercept)	-27.3	0.0503386	-542.379	0	0	count	0
50185	AL354994.1	0	AL354994.1	FAIL	(Intercept)	-27.3	0.0503386	-542.379	0	0	count	0
50188	AL355076.2	0	AL355076.2	FAIL	(Intercept)	-27.3	0.0503386	-542.379	0	0	count	0
50191	AL355304.1	0	AL355304.1	FAIL	(Intercept)	-27.3	0.0503386	-542.379	0	0	count	0
50194	AL355314.2	0	AL355314.2	FAIL	(Intercept)	-27.3	0.0503386	-542.379	0	0	count	0
50197	AL355390.2	0	AL355390.2	FAIL	(Intercept)	-27.3	0.0503386	-542.379	0	0	count	0
50200	AL355482.2	0	AL355482.2	FAIL	(Intercept)	-27.3	0.0503386	-542.379	0	0	count	0
50203	AL355499.1	0	AL355499.1	FAIL	(Intercept)	-27.3	0.0503386	-542.379	0	0	count	0
50206	AL355512.1	0	AL355512.1	FAIL	(Intercept)	-27.3	0.0503386	-542.379	0	0	count	0
50212	AL355581.1	0	AL355581.1	FAIL	(Intercept)	-27.3	0.0503386	-542.379	0	0	count	0
50215	AL355592.1	0	AL355592.1	FAIL	(Intercept)	-27.3	0.0503386	-542.379	0	0	count	0
50218	AL355613.1	0	AL355613.1	FAIL	(Intercept)	-27.3	0.0503386	-542.379	0	0	count	0
50221	AL355838.1	0	AL355838.1	FAIL	(Intercept)	-27.3	0.0503386	-542.379	0	0	count	0
50227	AL355916.1	0	AL355916.1	FAIL	(Intercept)	-27.3	0.0503386	-542.379	0	0	count	0
50230	AL355916.3	0	AL355916.3	FAIL	(Intercept)	-27.3	0.0503386	-542.379	0	0	count	0
50236	AL355922.4	0	AL355922.4	FAIL	(Intercept)	-27.3	0.0503386	-542.379	0	0	count	0
50239	AL355987.2	0	AL355987.2	FAIL	(Intercept)	-27.3	0.0503386	-542.379	0	0	count	0
50242	AL355997.1	0	AL355997.1	FAIL	(Intercept)	-27.3	0.0503386	-542.379	0	0	count	0
50245	AL356000.1	0	AL356000.1	FAIL	(Intercept)	-27.3	0.0503386	-542.379	0	0	count	0
50251	AL356108.1	0	AL356108.1	FAIL	(Intercept)	-27.3	0.0503386	-542.379	0	0	count	0
50254	AL356124.1	0	AL356124.1	FAIL	(Intercept)	-27.3	0.0503386	-542.379	0	0	count	0
50257	AL356134.1	0	AL356134.1	FAIL	(Intercept)	-27.3	0.0503386	-542.379	0	0	count	0
50260	AL356235.1	0	AL356235.1	FAIL	(Intercept)	-27.3	0.0503386	-542.379	0	0	count	0
50263	AL356272.1	0	AL356272.1	FAIL	(Intercept)	-27.3	0.0503386	-542.379	0	0	count	0
50269	AL356275.1	0	AL356275.1	FAIL	(Intercept)	-27.3	0.0503386	-542.379	0	0	count	0
50272	AL356277.3	0	AL356277.3	FAIL	(Intercept)	-27.3	0.0503386	-542.379	0	0	count	0
50275	AL356289.1	0	AL356289.1	FAIL	(Intercept)	-27.3	0.0503386	-542.379	0	0	count	0
50278	AL356356.1	0	AL356356.1	FAIL	(Intercept)	-27.3	0.0503386	-542.379	0	0	count	0
50281	AL356413.1	0	AL356413.1	FAIL	(Intercept)	-27.3	0.0503386	-542.379	0	0	count	0
50287	AL356481.1	0	AL356481.1	FAIL	(Intercept)	-27.3	0.0503386	-542.379	0	0	count	0
50290	AL356488.3	0	AL356488.3	FAIL	(Intercept)	-27.3	0.0503386	-542.379	0	0	count	0
50293	AL356535.1	0	AL356535.1	FAIL	(Intercept)	-27.3	0.0503386	-542.379	0	0	count	0
50296	AL356585.3	0	AL356585.3	FAIL	(Intercept)	-27.3	0.0503386	-542.379	0	0	count	0
50302	AL356807.1	0	AL356807.1	FAIL	(Intercept)	-27.3	0.0503386	-542.379	0	0	count	0
50305	AL356966.1	0	AL356966.1	FAIL	(Intercept)	-27.3	0.0503386	-542.379	0	0	count	0
50311	AL357054.4	0	AL357054.4	FAIL	(Intercept)	-27.3	0.0503386	-542.379	0	0	count	0
50314	AL357060.1	0	AL357060.1	FAIL	(Intercept)	-27.3	0.0503386	-542.379	0	0	count	0
50320	AL357172.1	0	AL357172.1	FAIL	(Intercept)	-27.3	0.0503386	-542.379	0	0	count	0
50323	AL357514.1	0	AL357514.1	FAIL	(Intercept)	-27.3	0.0503386	-542.379	0	0	count	0
50326	AL357793.1	0	AL357793.1	FAIL	(Intercept)	-27.3	0.0503386	-542.379	0	0	count	0
50329	AL358292.1	0	AL358292.1	FAIL	(Intercept)	-27.3	0.0503386	-542.379	0	0	count	0
50332	AL358332.1	0	AL358332.1	FAIL	(Intercept)	-27.3	0.0503386	-542.379	0	0	count	0
50335	AL358335.2	0	AL358335.2	FAIL	(Intercept)	-27.3	0.0503386	-542.379	0	0	count	0
50341	AL358394.3	0	AL358394.3	FAIL	(Intercept)	-27.3	0.0503386	-542.379	0	0	count	0
50344	AL358452.1	0	AL358452.1	FAIL	(Intercept)	-27.3	0.0503386	-542.379	0	0	count	0
50347	AL358473.1	0	AL358473.1	FAIL	(Intercept)	-27.3	0.0503386	-542.379	0	0	count	0
50350	AL358613.3	0	AL358613.3	FAIL	(Intercept)	-27.3	0.0503386	-542.379	0	0	count	0
50359	AL359183.1	0	AL359183.1	FAIL	(Intercept)	-27.3	0.0503386	-542.379	0	0	count	0
50362	AL359220.1	0	AL359220.1	FAIL	(Intercept)	-27.3	0.0503386	-542.379	0	0	count	0
50365	AL359237.1	0	AL359237.1	FAIL	(Intercept)	-27.3	0.0503386	-542.379	0	0	count	0
50368	AL359265.2	0	AL359265.2	FAIL	(Intercept)	-27.3	0.0503386	-542.379	0	0	count	0
50371	AL359313.1	0	AL359313.1	FAIL	(Intercept)	-27.3	0.0503386	-542.379	0	0	count	0
50374	AL359378.1	0	AL359378.1	FAIL	(Intercept)	-27.3	0.0503386	-542.379	0	0	count	0
50377	AL359551.1	0	AL359551.1	FAIL	(Intercept)	-27.3	0.0503386	-542.379	0	0	count	0
50380	AL359636.2	0	AL359636.2	FAIL	(Intercept)	-27.3	0.0503386	-542.379	0	0	count	0
50383	AL359644.1	0	AL359644.1	FAIL	(Intercept)	-27.3	0.0503386	-542.379	0	0	count	0
50386	AL359853.3	0	AL359853.3	FAIL	(Intercept)	-27.3	0.0503386	-542.379	0	0	count	0
50395	AL359924.1	0	AL359924.1	FAIL	(Intercept)	-27.3	0.0503386	-542.379	0	0	count	0
50401	AL365209.1	0	AL365209.1	FAIL	(Intercept)	-27.3	0.0503386	-542.379	0	0	count	0
50404	AL365256.1	0	AL365256.1	FAIL	(Intercept)	-27.3	0.0503386	-542.379	0	0	count	0
50407	AL365273.1	0	AL365273.1	FAIL	(Intercept)	-27.3	0.0503386	-542.379	0	0	count	0
50410	AL365273.2	0	AL365273.2	FAIL	(Intercept)	-27.3	0.0503386	-542.379	0	0	count	0
50413	AL365357.1	0	AL365357.1	FAIL	(Intercept)	-27.3	0.0503386	-542.379	0	0	count	0
50419	AL365440.2	0	AL365440.2	FAIL	(Intercept)	-27.3	0.0503386	-542.379	0	0	count	0
50422	AL365475.1	0	AL365475.1	FAIL	(Intercept)	-27.3	0.0503386	-542.379	0	0	count	0
50425	AL390036.1	0	AL390036.1	FAIL	(Intercept)	-27.3	0.0503386	-542.379	0	0	count	0
50428	AL390728.4	0	AL390728.4	FAIL	(Intercept)	-27.3	0.0503386	-542.379	0	0	count	0
50431	AL390728.6	0	AL390728.6	FAIL	(Intercept)	-27.3	0.0503386	-542.379	0	0	count	0
50437	AL390800.1	0	AL390800.1	FAIL	(Intercept)	-27.3	0.0503386	-542.379	0	0	count	0
50440	AL390816.2	0	AL390816.2	FAIL	(Intercept)	-27.3	0.0503386	-542.379	0	0	count	0
50446	AL390866.1	0	AL390866.1	FAIL	(Intercept)	-27.3	0.0503386	-542.379	0	0	count	0
50449	AL390962.1	0	AL390962.1	FAIL	(Intercept)	-27.3	0.0503386	-542.379	0	0	count	0
50452	AL390964.1	0	AL390964.1	FAIL	(Intercept)	-27.3	0.0503386	-542.379	0	0	count	0
50458	AL391152.1	0	AL391152.1	FAIL	(Intercept)	-27.3	0.0503386	-542.379	0	0	count	0
50461	AL391261.2	0	AL391261.2	FAIL	(Intercept)	-27.3	0.0503386	-542.379	0	0	count	0
50464	AL391422.1	0	AL391422.1	FAIL	(Intercept)	-27.3	0.0503386	-542.379	0	0	count	0
50467	AL391422.2	0	AL391422.2	FAIL	(Intercept)	-27.3	0.0503386	-542.379	0	0	count	0
50470	AL391825.1	0	AL391825.1	FAIL	(Intercept)	-27.3	0.0503386	-542.379	0	0	count	0
50473	AL391832.1	0	AL391832.1	FAIL	(Intercept)	-27.3	0.0503386	-542.379	0	0	count	0
50476	AL391832.2	0	AL391832.2	FAIL	(Intercept)	-27.3	0.0503386	-542.379	0	0	count	0
50485	AL391839.1	0	AL391839.1	FAIL	(Intercept)	-27.3	0.0503386	-542.379	0	0	count	0
50488	AL392046.1	0	AL392046.1	FAIL	(Intercept)	-27.3	0.0503386	-542.379	0	0	count	0
50491	AL392172.1	0	AL392172.1	FAIL	(Intercept)	-27.3	0.0503386	-542.379	0	0	count	0
50497	AL445250.1	0	AL445250.1	FAIL	(Intercept)	-27.3	0.0503386	-542.379	0	0	count	0
50500	AL445259.1	0	AL445259.1	FAIL	(Intercept)	-27.3	0.0503386	-542.379	0	0	count	0
50509	AL445584.2	0	AL445584.2	FAIL	(Intercept)	-27.3	0.0503386	-542.379	0	0	count	0
50515	AL445928.2	0	AL445928.2	FAIL	(Intercept)	-27.3	0.0503386	-542.379	0	0	count	0
50518	AL450311.1	0	AL450311.1	FAIL	(Intercept)	-27.3	0.0503386	-542.379	0	0	count	0
50521	AL450423.1	0	AL450423.1	FAIL	(Intercept)	-27.3	0.0503386	-542.379	0	0	count	0
50524	AL450426.1	0	AL450426.1	FAIL	(Intercept)	-27.3	0.0503386	-542.379	0	0	count	0
50527	AL450442.1	0	AL450442.1	FAIL	(Intercept)	-27.3	0.0503386	-542.379	0	0	count	0
50530	AL450992.1	0	AL450992.1	FAIL	(Intercept)	-27.3	0.0503386	-542.379	0	0	count	0
50533	AL451007.1	0	AL451007.1	FAIL	(Intercept)	-27.3	0.0503386	-542.379	0	0	count	0
50539	AL451063.1	0	AL451063.1	FAIL	(Intercept)	-27.3	0.0503386	-542.379	0	0	count	0
50542	AL451069.2	0	AL451069.2	FAIL	(Intercept)	-27.3	0.0503386	-542.379	0	0	count	0
50545	AL451074.3	0	AL451074.3	FAIL	(Intercept)	-27.3	0.0503386	-542.379	0	0	count	0
50548	AL451127.1	0	AL451127.1	FAIL	(Intercept)	-27.3	0.0503386	-542.379	0	0	count	0
50551	AL451164.2	0	AL451164.2	FAIL	(Intercept)	-27.3	0.0503386	-542.379	0	0	count	0
50554	AL499616.1	0	AL499616.1	FAIL	(Intercept)	-27.3	0.0503386	-542.379	0	0	count	0
50557	AL512271.1	0	AL512271.1	FAIL	(Intercept)	-27.3	0.0503386	-542.379	0	0	count	0
50560	AL512310.11	0	AL512310.11	FAIL	(Intercept)	-27.3	0.0503386	-542.379	0	0	count	0
50563	AL512310.2	0	AL512310.2	FAIL	(Intercept)	-27.3	0.0503386	-542.379	0	0	count	0
50566	AL512380.2	0	AL512380.2	FAIL	(Intercept)	-27.3	0.0503386	-542.379	0	0	count	0
50572	AL512631.1	0	AL512631.1	FAIL	(Intercept)	-27.3	0.0503386	-542.379	0	0	count	0
50575	AL512634.1	0	AL512634.1	FAIL	(Intercept)	-27.3	0.0503386	-542.379	0	0	count	0
50578	AL512658.2	0	AL512658.2	FAIL	(Intercept)	-27.3	0.0503386	-542.379	0	0	count	0
50584	AL513164.1	0	AL513164.1	FAIL	(Intercept)	-27.3	0.0503386	-542.379	0	0	count	0
50590	AL513323.1	0	AL513323.1	FAIL	(Intercept)	-27.3	0.0503386	-542.379	0	0	count	0
50593	AL513327.1	0	AL513327.1	FAIL	(Intercept)	-27.3	0.0503386	-542.379	0	0	count	0
50596	AL583805.1	1	AL583805.1	FAIL	(Intercept)	-27.3	0.0503386	-542.379	0	0	count	0
50602	AL583808.2	0	AL583808.2	FAIL	(Intercept)	-27.3	0.0503386	-542.379	0	0	count	0
50605	AL589678.1	0	AL589678.1	FAIL	(Intercept)	-27.3	0.0503386	-542.379	0	0	count	0
50608	AL589743.8	0	AL589743.8	FAIL	(Intercept)	-27.3	0.0503386	-542.379	0	0	count	0
50611	AL589765.7	0	AL589765.7	FAIL	(Intercept)	-27.3	0.0503386	-542.379	0	0	count	0
50617	AL589923.1	0	AL589923.1	FAIL	(Intercept)	-27.3	0.0503386	-542.379	0	0	count	0
50623	AL590079.1	0	AL590079.1	FAIL	(Intercept)	-27.3	0.0503386	-542.379	0	0	count	0
50626	AL590764.1	0	AL590764.1	FAIL	(Intercept)	-27.3	0.0503386	-542.379	0	0	count	0
50629	AL590764.2	0	AL590764.2	FAIL	(Intercept)	-27.3	0.0503386	-542.379	0	0	count	0
50638	AL590867.1	0	AL590867.1	FAIL	(Intercept)	-27.3	0.0503386	-542.379	0	0	count	0
50641	AL591501.1	0	AL591501.1	FAIL	(Intercept)	-27.3	0.0503386	-542.379	0	0	count	0
50647	AL591806.3	0	AL591806.3	FAIL	(Intercept)	-27.3	0.0503386	-542.379	0	0	count	0
50650	AL591885.1	0	AL591885.1	FAIL	(Intercept)	-27.3	0.0503386	-542.379	0	0	count	0
50653	AL591888.1	0	AL591888.1	FAIL	(Intercept)	-27.3	0.0503386	-542.379	0	0	count	0
50659	AL592164.2	0	AL592164.2	FAIL	(Intercept)	-27.3	0.0503386	-542.379	0	0	count	0
50662	AL592295.4	0	AL592295.4	FAIL	(Intercept)	-27.3	0.0503386	-542.379	0	0	count	0
50665	AL592402.1	0	AL592402.1	FAIL	(Intercept)	-27.3	0.0503386	-542.379	0	0	count	0
50668	AL592486.1	0	AL592486.1	FAIL	(Intercept)	-27.3	0.0503386	-542.379	0	0	count	0
50671	AL592490.1	0	AL592490.1	FAIL	(Intercept)	-27.3	0.0503386	-542.379	0	0	count	0
50677	AL592528.1	0	AL592528.1	FAIL	(Intercept)	-27.3	0.0503386	-542.379	0	0	count	0
50686	AL596247.1	0	AL596247.1	FAIL	(Intercept)	-27.3	0.0503386	-542.379	0	0	count	0
50689	AL596275.2	0	AL596275.2	FAIL	(Intercept)	-27.3	0.0503386	-542.379	0	0	count	0
50692	AL596325.2	0	AL596325.2	FAIL	(Intercept)	-27.3	0.0503386	-542.379	0	0	count	0
50701	AL606516.1	0	AL606516.1	FAIL	(Intercept)	-27.3	0.0503386	-542.379	0	0	count	0
50704	AL606804.1	0	AL606804.1	FAIL	(Intercept)	-27.3	0.0503386	-542.379	0	0	count	0
50707	AL607028.1	0	AL607028.1	FAIL	(Intercept)	-27.3	0.0503386	-542.379	0	0	count	0
50713	AL645941.2	0	AL645941.2	FAIL	(Intercept)	-27.3	0.0503386	-542.379	0	0	count	0
50716	AL646090.2	0	AL646090.2	FAIL	(Intercept)	-27.3	0.0503386	-542.379	0	0	count	0
50719	AL662791.2	0	AL662791.2	FAIL	(Intercept)	-27.3	0.0503386	-542.379	0	0	count	0
50725	AL663023.1	0	AL663023.1	FAIL	(Intercept)	-27.3	0.0503386	-542.379	0	0	count	0
50728	AL669831.4	0	AL669831.4	FAIL	(Intercept)	-27.3	0.0503386	-542.379	0	0	count	0
50734	AL669918.1	0	AL669918.1	FAIL	(Intercept)	-27.3	0.0503386	-542.379	0	0	count	0
50737	AL669983.1	0	AL669983.1	FAIL	(Intercept)	-27.3	0.0503386	-542.379	0	0	count	0
50746	AL672212.1	0	AL672212.1	FAIL	(Intercept)	-27.3	0.0503386	-542.379	0	0	count	0
50749	AL691403.1	0	AL691403.1	FAIL	(Intercept)	-27.3	0.0503386	-542.379	0	0	count	0
50752	AL691520.1	0	AL691520.1	FAIL	(Intercept)	-27.3	0.0503386	-542.379	0	0	count	0
50755	AL713851.1	0	AL713851.1	FAIL	(Intercept)	-27.3	0.0503386	-542.379	0	0	count	0
50758	AL772202.1	0	AL772202.1	FAIL	(Intercept)	-27.3	0.0503386	-542.379	0	0	count	0
50761	AL807742.1	0	AL807742.1	FAIL	(Intercept)	-27.3	0.0503386	-542.379	0	0	count	0
50767	AL807761.4	0	AL807761.4	FAIL	(Intercept)	-27.3	0.0503386	-542.379	0	0	count	0
50773	AL845472.1	0	AL845472.1	FAIL	(Intercept)	-27.3	0.0503386	-542.379	0	0	count	0
50776	AL928654.3	0	AL928654.3	FAIL	(Intercept)	-27.3	0.0503386	-542.379	0	0	count	0
50779	AL929288.1	0	AL929288.1	FAIL	(Intercept)	-27.3	0.0503386	-542.379	0	0	count	0
50782	AL954650.1	0	AL954650.1	FAIL	(Intercept)	-27.3	0.0503386	-542.379	0	0	count	0
50785	ALAS2	11	ALAS2	FAIL	(Intercept)	-27.3	0.0503386	-542.379	0	0	count	0
50794	ALDH3A1	0	ALDH3A1	FAIL	(Intercept)	-27.3	0.0503386	-542.379	0	0	count	0
50806	ALOX15B	0	ALOX15B	FAIL	(Intercept)	-27.3	0.0503386	-542.379	0	0	count	0
50815	ALPK2	1	ALPK2	FAIL	(Intercept)	-27.3	0.0503386	-542.379	0	0	count	0
50827	ALX4	0	ALX4	FAIL	(Intercept)	-27.3	0.0503386	-542.379	0	0	count	0
50833	AMPD1	0	AMPD1	FAIL	(Intercept)	-27.3	0.0503386	-542.379	0	0	count	0
50839	AMTN	0	AMTN	FAIL	(Intercept)	-27.3	0.0503386	-542.379	0	0	count	0
50842	AMY2A	0	AMY2A	FAIL	(Intercept)	-27.3	0.0503386	-542.379	0	0	count	0
50845	ANAPC1P1	0	ANAPC1P1	FAIL	(Intercept)	-27.3	0.0503386	-542.379	0	0	count	0
50878	ANKRD20A17P	0	ANKRD20A17P	FAIL	(Intercept)	-27.3	0.0503386	-542.379	0	0	count	0
50881	ANKRD20A21P	0	ANKRD20A21P	FAIL	(Intercept)	-27.3	0.0503386	-542.379	0	0	count	0
50884	ANKRD20A5P	0	ANKRD20A5P	FAIL	(Intercept)	-27.3	0.0503386	-542.379	0	0	count	0
50890	ANKRD26P2	0	ANKRD26P2	FAIL	(Intercept)	-27.3	0.0503386	-542.379	0	0	count	0
50893	ANKRD26P3	0	ANKRD26P3	FAIL	(Intercept)	-27.3	0.0503386	-542.379	0	0	count	0
50905	ANKRD30BP1	0	ANKRD30BP1	FAIL	(Intercept)	-27.3	0.0503386	-542.379	0	0	count	0
50908	ANKRD30BP3	0	ANKRD30BP3	FAIL	(Intercept)	-27.3	0.0503386	-542.379	0	0	count	0
50914	ANKRD36BP2	4	ANKRD36BP2	FAIL	(Intercept)	-27.3	0.0503386	-542.379	0	0	count	0
50920	ANO1	1	ANO1	FAIL	(Intercept)	-27.3	0.0503386	-542.379	0	0	count	0
50932	ANO9	0	ANO9	FAIL	(Intercept)	-27.3	0.0503386	-542.379	0	0	count	0
50935	ANP32AP1	0	ANP32AP1	FAIL	(Intercept)	-27.3	0.0503386	-542.379	0	0	count	0
50965	AP000331.1	0	AP000331.1	FAIL	(Intercept)	-27.3	0.0503386	-542.379	0	0	count	0
50968	AP000350.2	0	AP000350.2	FAIL	(Intercept)	-27.3	0.0503386	-542.379	0	0	count	0
50977	AP000357.2	0	AP000357.2	FAIL	(Intercept)	-27.3	0.0503386	-542.379	0	0	count	0
50980	AP000438.2	0	AP000438.2	FAIL	(Intercept)	-27.3	0.0503386	-542.379	0	0	count	0
50983	AP000439.3	0	AP000439.3	FAIL	(Intercept)	-27.3	0.0503386	-542.379	0	0	count	0
50986	AP000442.2	0	AP000442.2	FAIL	(Intercept)	-27.3	0.0503386	-542.379	0	0	count	0
50989	AP000470.1	0	AP000470.1	FAIL	(Intercept)	-27.3	0.0503386	-542.379	0	0	count	0
50992	AP000472.1	0	AP000472.1	FAIL	(Intercept)	-27.3	0.0503386	-542.379	0	0	count	0
50995	AP000477.1	0	AP000477.1	FAIL	(Intercept)	-27.3	0.0503386	-542.379	0	0	count	0
50998	AP000484.1	0	AP000484.1	FAIL	(Intercept)	-27.3	0.0503386	-542.379	0	0	count	0
51001	AP000527.1	0	AP000527.1	FAIL	(Intercept)	-27.3	0.0503386	-542.379	0	0	count	0
51004	AP000534.2	0	AP000534.2	FAIL	(Intercept)	-27.3	0.0503386	-542.379	0	0	count	0
51010	AP000553.5	0	AP000553.5	FAIL	(Intercept)	-27.3	0.0503386	-542.379	0	0	count	0
51013	AP000561.1	0	AP000561.1	FAIL	(Intercept)	-27.3	0.0503386	-542.379	0	0	count	0
51016	AP000676.5	0	AP000676.5	FAIL	(Intercept)	-27.3	0.0503386	-542.379	0	0	count	0
51019	AP000695.1	0	AP000695.1	FAIL	(Intercept)	-27.3	0.0503386	-542.379	0	0	count	0
51025	AP000763.3	0	AP000763.3	FAIL	(Intercept)	-27.3	0.0503386	-542.379	0	0	count	0
51028	AP000770.1	0	AP000770.1	FAIL	(Intercept)	-27.3	0.0503386	-542.379	0	0	count	0
51031	AP000777.1	0	AP000777.1	FAIL	(Intercept)	-27.3	0.0503386	-542.379	0	0	count	0
51034	AP000781.2	0	AP000781.2	FAIL	(Intercept)	-27.3	0.0503386	-542.379	0	0	count	0
51037	AP000811.1	0	AP000811.1	FAIL	(Intercept)	-27.3	0.0503386	-542.379	0	0	count	0
51046	AP000911.1	0	AP000911.1	FAIL	(Intercept)	-27.3	0.0503386	-542.379	0	0	count	0
51049	AP000919.2	0	AP000919.2	FAIL	(Intercept)	-27.3	0.0503386	-542.379	0	0	count	0
51052	AP000919.3	0	AP000919.3	FAIL	(Intercept)	-27.3	0.0503386	-542.379	0	0	count	0
51055	AP000942.2	0	AP000942.2	FAIL	(Intercept)	-27.3	0.0503386	-542.379	0	0	count	0
51058	AP000943.3	0	AP000943.3	FAIL	(Intercept)	-27.3	0.0503386	-542.379	0	0	count	0
51061	AP001001.1	0	AP001001.1	FAIL	(Intercept)	-27.3	0.0503386	-542.379	0	0	count	0
51064	AP001024.1	0	AP001024.1	FAIL	(Intercept)	-27.3	0.0503386	-542.379	0	0	count	0
51067	AP001025.1	0	AP001025.1	FAIL	(Intercept)	-27.3	0.0503386	-542.379	0	0	count	0
51070	AP001043.1	0	AP001043.1	FAIL	(Intercept)	-27.3	0.0503386	-542.379	0	0	count	0
51073	AP001109.1	0	AP001109.1	FAIL	(Intercept)	-27.3	0.0503386	-542.379	0	0	count	0
51076	AP001116.1	0	AP001116.1	FAIL	(Intercept)	-27.3	0.0503386	-542.379	0	0	count	0
51079	AP001117.1	0	AP001117.1	FAIL	(Intercept)	-27.3	0.0503386	-542.379	0	0	count	0
51085	AP001207.3	0	AP001207.3	FAIL	(Intercept)	-27.3	0.0503386	-542.379	0	0	count	0
51103	AP001528.1	0	AP001528.1	FAIL	(Intercept)	-27.3	0.0503386	-542.379	0	0	count	0
51109	AP001596.1	0	AP001596.1	FAIL	(Intercept)	-27.3	0.0503386	-542.379	0	0	count	0
51112	AP001604.1	0	AP001604.1	FAIL	(Intercept)	-27.3	0.0503386	-542.379	0	0	count	0
51118	AP001636.3	0	AP001636.3	FAIL	(Intercept)	-27.3	0.0503386	-542.379	0	0	count	0
51121	AP001646.3	0	AP001646.3	FAIL	(Intercept)	-27.3	0.0503386	-542.379	0	0	count	0
51124	AP001767.3	0	AP001767.3	FAIL	(Intercept)	-27.3	0.0503386	-542.379	0	0	count	0
51127	AP001803.1	0	AP001803.1	FAIL	(Intercept)	-27.3	0.0503386	-542.379	0	0	count	0
51130	AP001825.1	0	AP001825.1	FAIL	(Intercept)	-27.3	0.0503386	-542.379	0	0	count	0
51133	AP001831.1	1	AP001831.1	FAIL	(Intercept)	-27.3	0.0503386	-542.379	0	0	count	0
51139	AP002383.2	0	AP002383.2	FAIL	(Intercept)	-27.3	0.0503386	-542.379	0	0	count	0
51148	AP002444.1	0	AP002444.1	FAIL	(Intercept)	-27.3	0.0503386	-542.379	0	0	count	0
51151	AP002759.1	0	AP002759.1	FAIL	(Intercept)	-27.3	0.0503386	-542.379	0	0	count	0
51154	AP002762.1	0	AP002762.1	FAIL	(Intercept)	-27.3	0.0503386	-542.379	0	0	count	0
51163	AP002812.5	0	AP002812.5	FAIL	(Intercept)	-27.3	0.0503386	-542.379	0	0	count	0
51166	AP002856.2	0	AP002856.2	FAIL	(Intercept)	-27.3	0.0503386	-542.379	0	0	count	0
51169	AP002856.4	0	AP002856.4	FAIL	(Intercept)	-27.3	0.0503386	-542.379	0	0	count	0
51172	AP002907.1	1	AP002907.1	FAIL	(Intercept)	-27.3	0.0503386	-542.379	0	0	count	0
51175	AP002961.1	0	AP002961.1	FAIL	(Intercept)	-27.3	0.0503386	-542.379	0	0	count	0
51178	AP002989.1	0	AP002989.1	FAIL	(Intercept)	-27.3	0.0503386	-542.379	0	0	count	0
51181	AP002991.1	0	AP002991.1	FAIL	(Intercept)	-27.3	0.0503386	-542.379	0	0	count	0
51187	AP003063.2	0	AP003063.2	FAIL	(Intercept)	-27.3	0.0503386	-542.379	0	0	count	0
51190	AP003066.1	0	AP003066.1	FAIL	(Intercept)	-27.3	0.0503386	-542.379	0	0	count	0
51193	AP003110.1	0	AP003110.1	FAIL	(Intercept)	-27.3	0.0503386	-542.379	0	0	count	0
51199	AP003716.1	0	AP003716.1	FAIL	(Intercept)	-27.3	0.0503386	-542.379	0	0	count	0
51202	AP003717.1	0	AP003717.1	FAIL	(Intercept)	-27.3	0.0503386	-542.379	0	0	count	0
51205	AP003774.4	0	AP003774.4	FAIL	(Intercept)	-27.3	0.0503386	-542.379	0	0	count	0
51211	AP005059.2	0	AP005059.2	FAIL	(Intercept)	-27.3	0.0503386	-542.379	0	0	count	0
51214	AP005203.1	0	AP005203.1	FAIL	(Intercept)	-27.3	0.0503386	-542.379	0	0	count	0
51217	AP005229.1	0	AP005229.1	FAIL	(Intercept)	-27.3	0.0503386	-542.379	0	0	count	0
51220	AP005242.1	0	AP005242.1	FAIL	(Intercept)	-27.3	0.0503386	-542.379	0	0	count	0
51223	AP005328.1	0	AP005328.1	FAIL	(Intercept)	-27.3	0.0503386	-542.379	0	0	count	0
51226	AP005597.1	0	AP005597.1	FAIL	(Intercept)	-27.3	0.0503386	-542.379	0	0	count	0
51244	APELA	1	APELA	FAIL	(Intercept)	-27.3	0.0503386	-542.379	0	0	count	0
51247	APOB	0	APOB	FAIL	(Intercept)	-27.3	0.0503386	-542.379	0	0	count	0
51250	APOBEC3C	1	APOBEC3C	FAIL	(Intercept)	-27.3	0.0503386	-542.379	0	0	count	0
51253	APOBEC3G	5	APOBEC3G	FAIL	(Intercept)	-27.3	0.0503386	-542.379	0	0	count	0
51256	APOBR	1	APOBR	FAIL	(Intercept)	-27.3	0.0503386	-542.379	0	0	count	0
51262	APOC1P1	3	APOC1P1	FAIL	(Intercept)	-27.3	0.0503386	-542.379	0	0	count	0
51271	APOH	0	APOH	FAIL	(Intercept)	-27.3	0.0503386	-542.379	0	0	count	0
51277	APOL4	1	APOL4	FAIL	(Intercept)	-27.3	0.0503386	-542.379	0	0	count	0
51280	APOL5	0	APOL5	FAIL	(Intercept)	-27.3	0.0503386	-542.379	0	0	count	0
51289	AREG	1	AREG	FAIL	(Intercept)	-27.3	0.0503386	-542.379	0	0	count	0
51316	ARHGAP8	0	ARHGAP8	FAIL	(Intercept)	-27.3	0.0503386	-542.379	0	0	count	0
51319	ARHGAP9	2	ARHGAP9	FAIL	(Intercept)	-27.3	0.0503386	-542.379	0	0	count	0
51343	ARL11	0	ARL11	FAIL	(Intercept)	-27.3	0.0503386	-542.379	0	0	count	0
51346	ARL14EPL	0	ARL14EPL	FAIL	(Intercept)	-27.3	0.0503386	-542.379	0	0	count	0
51349	ARL5C	0	ARL5C	FAIL	(Intercept)	-27.3	0.0503386	-542.379	0	0	count	0
51355	ARLNC1	0	ARLNC1	FAIL	(Intercept)	-27.3	0.0503386	-542.379	0	0	count	0
51370	ARRDC5	0	ARRDC5	FAIL	(Intercept)	-27.3	0.0503386	-542.379	0	0	count	0
51376	ASAH2	0	ASAH2	FAIL	(Intercept)	-27.3	0.0503386	-542.379	0	0	count	0
51385	ASB5	1	ASB5	FAIL	(Intercept)	-27.3	0.0503386	-542.379	0	0	count	0
51388	ASB9	0	ASB9	FAIL	(Intercept)	-27.3	0.0503386	-542.379	0	0	count	0
51391	ASCL2	0	ASCL2	FAIL	(Intercept)	-27.3	0.0503386	-542.379	0	0	count	0
51394	ASIC5	0	ASIC5	FAIL	(Intercept)	-27.3	0.0503386	-542.379	0	0	count	0
51400	ASMTL-AS1	0	ASMTL-AS1	FAIL	(Intercept)	-27.3	0.0503386	-542.379	0	0	count	0
51403	ASNSP1	0	ASNSP1	FAIL	(Intercept)	-27.3	0.0503386	-542.379	0	0	count	0
51409	ASS1P2	0	ASS1P2	FAIL	(Intercept)	-27.3	0.0503386	-542.379	0	0	count	0
51412	ASTL	0	ASTL	FAIL	(Intercept)	-27.3	0.0503386	-542.379	0	0	count	0
51424	ATP11AUN	0	ATP11AUN	FAIL	(Intercept)	-27.3	0.0503386	-542.379	0	0	count	0
51451	ATP6V1B1	1	ATP6V1B1	FAIL	(Intercept)	-27.3	0.0503386	-542.379	0	0	count	0
51460	ATP8A2P3	0	ATP8A2P3	FAIL	(Intercept)	-27.3	0.0503386	-542.379	0	0	count	0
51466	ATP8B3	0	ATP8B3	FAIL	(Intercept)	-27.3	0.0503386	-542.379	0	0	count	0
51487	B3GNT8	0	B3GNT8	FAIL	(Intercept)	-27.3	0.0503386	-542.379	0	0	count	0
51505	BACH1-IT3	0	BACH1-IT3	FAIL	(Intercept)	-27.3	0.0503386	-542.379	0	0	count	0
51508	BAIAP2-DT	0	BAIAP2-DT	FAIL	(Intercept)	-27.3	0.0503386	-542.379	0	0	count	0
51514	BANCR	0	BANCR	FAIL	(Intercept)	-27.3	0.0503386	-542.379	0	0	count	0
51517	BANF2	0	BANF2	FAIL	(Intercept)	-27.3	0.0503386	-542.379	0	0	count	0
51523	BATF	0	BATF	FAIL	(Intercept)	-27.3	0.0503386	-542.379	0	0	count	0
51571	BHLHE40-AS1	0	BHLHE40-AS1	FAIL	(Intercept)	-27.3	0.0503386	-542.379	0	0	count	0
51592	BMS1P22	0	BMS1P22	FAIL	(Intercept)	-27.3	0.0503386	-542.379	0	0	count	0
51598	BNC1	0	BNC1	FAIL	(Intercept)	-27.3	0.0503386	-542.379	0	0	count	0
51607	BOLL	0	BOLL	FAIL	(Intercept)	-27.3	0.0503386	-542.379	0	0	count	0
51619	BRDT	4	BRDT	FAIL	(Intercept)	-27.3	0.0503386	-542.379	0	0	count	0
51640	BTG3-AS1	0	BTG3-AS1	FAIL	(Intercept)	-27.3	0.0503386	-542.379	0	0	count	0
51646	BTLA	0	BTLA	FAIL	(Intercept)	-27.3	0.0503386	-542.379	0	0	count	0
51652	BTNL2	0	BTNL2	FAIL	(Intercept)	-27.3	0.0503386	-542.379	0	0	count	0
51655	BX119917.1	0	BX119917.1	FAIL	(Intercept)	-27.3	0.0503386	-542.379	0	0	count	0
51658	BX284668.5	0	BX284668.5	FAIL	(Intercept)	-27.3	0.0503386	-542.379	0	0	count	0
51661	BX470209.1	0	BX470209.1	FAIL	(Intercept)	-27.3	0.0503386	-542.379	0	0	count	0
51676	C11orf45	1	C11orf45	FAIL	(Intercept)	-27.3	0.0503386	-542.379	0	0	count	0
51679	C11orf53	0	C11orf53	FAIL	(Intercept)	-27.3	0.0503386	-542.379	0	0	count	0
51694	C13orf42	0	C13orf42	FAIL	(Intercept)	-27.3	0.0503386	-542.379	0	0	count	0
51700	C15orf39	5	C15orf39	FAIL	(Intercept)	-27.3	0.0503386	-542.379	0	0	count	0
51739	C22orf31	0	C22orf31	FAIL	(Intercept)	-27.3	0.0503386	-542.379	0	0	count	0
51763	C3orf67-AS1	0	C3orf67-AS1	FAIL	(Intercept)	-27.3	0.0503386	-542.379	0	0	count	0
51766	C3orf79	0	C3orf79	FAIL	(Intercept)	-27.3	0.0503386	-542.379	0	0	count	0
51769	C3orf85	0	C3orf85	FAIL	(Intercept)	-27.3	0.0503386	-542.379	0	0	count	0
51772	C3P1	0	C3P1	FAIL	(Intercept)	-27.3	0.0503386	-542.379	0	0	count	0
51793	C6	0	C6	FAIL	(Intercept)	-27.3	0.0503386	-542.379	0	0	count	0
51796	C6orf141	0	C6orf141	FAIL	(Intercept)	-27.3	0.0503386	-542.379	0	0	count	0
51799	C7	2	C7	FAIL	(Intercept)	-27.3	0.0503386	-542.379	0	0	count	0
51802	C7orf69	0	C7orf69	FAIL	(Intercept)	-27.3	0.0503386	-542.379	0	0	count	0
51805	C8A	0	C8A	FAIL	(Intercept)	-27.3	0.0503386	-542.379	0	0	count	0
51808	C8orf74	0	C8orf74	FAIL	(Intercept)	-27.3	0.0503386	-542.379	0	0	count	0
51847	CACNA2D3-AS1	1	CACNA2D3-AS1	FAIL	(Intercept)	-27.3	0.0503386	-542.379	0	0	count	0
51859	CALCB	0	CALCB	FAIL	(Intercept)	-27.3	0.0503386	-542.379	0	0	count	0
51862	CALCR	0	CALCR	FAIL	(Intercept)	-27.3	0.0503386	-542.379	0	0	count	0
51871	CALHM6	0	CALHM6	FAIL	(Intercept)	-27.3	0.0503386	-542.379	0	0	count	0
51907	CARD6	0	CARD6	FAIL	(Intercept)	-27.3	0.0503386	-542.379	0	0	count	0
51910	CARM1P1	0	CARM1P1	FAIL	(Intercept)	-27.3	0.0503386	-542.379	0	0	count	0
51913	CASC11	1	CASC11	FAIL	(Intercept)	-27.3	0.0503386	-542.379	0	0	count	0
51916	CASC16	0	CASC16	FAIL	(Intercept)	-27.3	0.0503386	-542.379	0	0	count	0
51919	CASC17	0	CASC17	FAIL	(Intercept)	-27.3	0.0503386	-542.379	0	0	count	0
51925	CASC19	0	CASC19	FAIL	(Intercept)	-27.3	0.0503386	-542.379	0	0	count	0
51928	CASC6	0	CASC6	FAIL	(Intercept)	-27.3	0.0503386	-542.379	0	0	count	0
51931	CASC9	0	CASC9	FAIL	(Intercept)	-27.3	0.0503386	-542.379	0	0	count	0
51937	CASP1	1	CASP1	FAIL	(Intercept)	-27.3	0.0503386	-542.379	0	0	count	0
51943	CASP17P	0	CASP17P	FAIL	(Intercept)	-27.3	0.0503386	-542.379	0	0	count	0
51964	CATIP-AS1	0	CATIP-AS1	FAIL	(Intercept)	-27.3	0.0503386	-542.379	0	0	count	0
51994	CCDC144NL-AS1	1	CCDC144NL-AS1	FAIL	(Intercept)	-27.3	0.0503386	-542.379	0	0	count	0
52009	CCDC172	0	CCDC172	FAIL	(Intercept)	-27.3	0.0503386	-542.379	0	0	count	0
52018	CCDC190	1	CCDC190	FAIL	(Intercept)	-27.3	0.0503386	-542.379	0	0	count	0
52024	CCDC194	0	CCDC194	FAIL	(Intercept)	-27.3	0.0503386	-542.379	0	0	count	0
52027	CCDC196	0	CCDC196	FAIL	(Intercept)	-27.3	0.0503386	-542.379	0	0	count	0
52030	CCDC198	0	CCDC198	FAIL	(Intercept)	-27.3	0.0503386	-542.379	0	0	count	0
52039	CCDC39-AS1	0	CCDC39-AS1	FAIL	(Intercept)	-27.3	0.0503386	-542.379	0	0	count	0
52048	CCDC68	0	CCDC68	FAIL	(Intercept)	-27.3	0.0503386	-542.379	0	0	count	0
52072	CCER1	0	CCER1	FAIL	(Intercept)	-27.3	0.0503386	-542.379	0	0	count	0
52075	CCL11	0	CCL11	FAIL	(Intercept)	-27.3	0.0503386	-542.379	0	0	count	0
52078	CCL20	1	CCL20	FAIL	(Intercept)	-27.3	0.0503386	-542.379	0	0	count	0
52081	CCL22	1	CCL22	FAIL	(Intercept)	-27.3	0.0503386	-542.379	0	0	count	0
52087	CCL3L1	1	CCL3L1	FAIL	(Intercept)	-27.3	0.0503386	-542.379	0	0	count	0
52111	CCNL2P1	1	CCNL2P1	FAIL	(Intercept)	-27.3	0.0503386	-542.379	0	0	count	0
52114	CCNT2-AS1	3	CCNT2-AS1	FAIL	(Intercept)	-27.3	0.0503386	-542.379	0	0	count	0
52123	CCR5	0	CCR5	FAIL	(Intercept)	-27.3	0.0503386	-542.379	0	0	count	0
52126	CCR9	0	CCR9	FAIL	(Intercept)	-27.3	0.0503386	-542.379	0	0	count	0
52129	CCRL2	0	CCRL2	FAIL	(Intercept)	-27.3	0.0503386	-542.379	0	0	count	0
52144	CD180	1	CD180	FAIL	(Intercept)	-27.3	0.0503386	-542.379	0	0	count	0
52150	CD2	0	CD2	FAIL	(Intercept)	-27.3	0.0503386	-542.379	0	0	count	0
52153	CD244	0	CD244	FAIL	(Intercept)	-27.3	0.0503386	-542.379	0	0	count	0
52162	CD28	2	CD28	FAIL	(Intercept)	-27.3	0.0503386	-542.379	0	0	count	0
52165	CD300A	6	CD300A	FAIL	(Intercept)	-27.3	0.0503386	-542.379	0	0	count	0
52168	CD300C	0	CD300C	FAIL	(Intercept)	-27.3	0.0503386	-542.379	0	0	count	0
52171	CD300LF	0	CD300LF	FAIL	(Intercept)	-27.3	0.0503386	-542.379	0	0	count	0
52174	CD33	2	CD33	FAIL	(Intercept)	-27.3	0.0503386	-542.379	0	0	count	0
52180	CD3D	1	CD3D	FAIL	(Intercept)	-27.3	0.0503386	-542.379	0	0	count	0
52183	CD3E	0	CD3E	FAIL	(Intercept)	-27.3	0.0503386	-542.379	0	0	count	0
52201	CD52	1	CD52	FAIL	(Intercept)	-27.3	0.0503386	-542.379	0	0	count	0
52210	CD5L	0	CD5L	FAIL	(Intercept)	-27.3	0.0503386	-542.379	0	0	count	0
52225	CD80	1	CD80	FAIL	(Intercept)	-27.3	0.0503386	-542.379	0	0	count	0
52231	CD84	7	CD84	FAIL	(Intercept)	-27.3	0.0503386	-542.379	0	0	count	0
52240	CD8B	0	CD8B	FAIL	(Intercept)	-27.3	0.0503386	-542.379	0	0	count	0
52243	CD8B2	0	CD8B2	FAIL	(Intercept)	-27.3	0.0503386	-542.379	0	0	count	0
52249	CD99P1	0	CD99P1	FAIL	(Intercept)	-27.3	0.0503386	-542.379	0	0	count	0
52252	CDC20B	0	CDC20B	FAIL	(Intercept)	-27.3	0.0503386	-542.379	0	0	count	0
52255	CDC27P3	0	CDC27P3	FAIL	(Intercept)	-27.3	0.0503386	-542.379	0	0	count	0
52270	CDH17	1	CDH17	FAIL	(Intercept)	-27.3	0.0503386	-542.379	0	0	count	0
52285	CDK15	0	CDK15	FAIL	(Intercept)	-27.3	0.0503386	-542.379	0	0	count	0
52297	CEACAM21	1	CEACAM21	FAIL	(Intercept)	-27.3	0.0503386	-542.379	0	0	count	0
52300	CEACAM22P	3	CEACAM22P	FAIL	(Intercept)	-27.3	0.0503386	-542.379	0	0	count	0
52303	CEACAM4	0	CEACAM4	FAIL	(Intercept)	-27.3	0.0503386	-542.379	0	0	count	0
52306	CEACAM6	0	CEACAM6	FAIL	(Intercept)	-27.3	0.0503386	-542.379	0	0	count	0
52312	CEBPA-DT	0	CEBPA-DT	FAIL	(Intercept)	-27.3	0.0503386	-542.379	0	0	count	0
52318	CELF2-AS2	6	CELF2-AS2	FAIL	(Intercept)	-27.3	0.0503386	-542.379	0	0	count	0
52321	CELF2-DT	0	CELF2-DT	FAIL	(Intercept)	-27.3	0.0503386	-542.379	0	0	count	0
52333	CEP164P1	0	CEP164P1	FAIL	(Intercept)	-27.3	0.0503386	-542.379	0	0	count	0
52342	CERKL	1	CERKL	FAIL	(Intercept)	-27.3	0.0503386	-542.379	0	0	count	0
52354	CFAP300	0	CFAP300	FAIL	(Intercept)	-27.3	0.0503386	-542.379	0	0	count	0
52357	CFAP44-AS1	0	CFAP44-AS1	FAIL	(Intercept)	-27.3	0.0503386	-542.379	0	0	count	0
52360	CFAP57	1	CFAP57	FAIL	(Intercept)	-27.3	0.0503386	-542.379	0	0	count	0
52363	CFB	0	CFB	FAIL	(Intercept)	-27.3	0.0503386	-542.379	0	0	count	0
52375	CFHR5	0	CFHR5	FAIL	(Intercept)	-27.3	0.0503386	-542.379	0	0	count	0
52378	CFLAR-AS1	1	CFLAR-AS1	FAIL	(Intercept)	-27.3	0.0503386	-542.379	0	0	count	0
52393	CHAT	0	CHAT	FAIL	(Intercept)	-27.3	0.0503386	-542.379	0	0	count	0
52414	CHMP1B2P	0	CHMP1B2P	FAIL	(Intercept)	-27.3	0.0503386	-542.379	0	0	count	0
52417	CHODL-AS1	0	CHODL-AS1	FAIL	(Intercept)	-27.3	0.0503386	-542.379	0	0	count	0
52423	CHRFAM7A	1	CHRFAM7A	FAIL	(Intercept)	-27.3	0.0503386	-542.379	0	0	count	0
52429	CHRM3-AS2	0	CHRM3-AS2	FAIL	(Intercept)	-27.3	0.0503386	-542.379	0	0	count	0
52435	CHRNA1	0	CHRNA1	FAIL	(Intercept)	-27.3	0.0503386	-542.379	0	0	count	0
52444	CHRNB3	0	CHRNB3	FAIL	(Intercept)	-27.3	0.0503386	-542.379	0	0	count	0
52447	CHRNB4	0	CHRNB4	FAIL	(Intercept)	-27.3	0.0503386	-542.379	0	0	count	0
52468	CIR1P2	0	CIR1P2	FAIL	(Intercept)	-27.3	0.0503386	-542.379	0	0	count	0
52471	CISH	0	CISH	FAIL	(Intercept)	-27.3	0.0503386	-542.379	0	0	count	0
52495	CLDN10-AS1	0	CLDN10-AS1	FAIL	(Intercept)	-27.3	0.0503386	-542.379	0	0	count	0
52507	CLDN23	0	CLDN23	FAIL	(Intercept)	-27.3	0.0503386	-542.379	0	0	count	0
52510	CLDN7	0	CLDN7	FAIL	(Intercept)	-27.3	0.0503386	-542.379	0	0	count	0
52513	CLEC17A	1	CLEC17A	FAIL	(Intercept)	-27.3	0.0503386	-542.379	0	0	count	0
52516	CLEC19A	2	CLEC19A	FAIL	(Intercept)	-27.3	0.0503386	-542.379	0	0	count	0
52522	CLEC1B	0	CLEC1B	FAIL	(Intercept)	-27.3	0.0503386	-542.379	0	0	count	0
52528	CLEC3A	0	CLEC3A	FAIL	(Intercept)	-27.3	0.0503386	-542.379	0	0	count	0
52531	CLEC4C	1	CLEC4C	FAIL	(Intercept)	-27.3	0.0503386	-542.379	0	0	count	0
52534	CLEC4E	0	CLEC4E	FAIL	(Intercept)	-27.3	0.0503386	-542.379	0	0	count	0
52546	CLECL1	0	CLECL1	FAIL	(Intercept)	-27.3	0.0503386	-542.379	0	0	count	0
52555	CLNK	0	CLNK	FAIL	(Intercept)	-27.3	0.0503386	-542.379	0	0	count	0
52561	CLRN1-AS1	0	CLRN1-AS1	FAIL	(Intercept)	-27.3	0.0503386	-542.379	0	0	count	0
52597	CNMD	0	CNMD	FAIL	(Intercept)	-27.3	0.0503386	-542.379	0	0	count	0
52612	CNTN4-AS2	1	CNTN4-AS2	FAIL	(Intercept)	-27.3	0.0503386	-542.379	0	0	count	0
52618	CNTNAP3C	0	CNTNAP3C	FAIL	(Intercept)	-27.3	0.0503386	-542.379	0	0	count	0
52669	COL6A3	1	COL6A3	FAIL	(Intercept)	-27.3	0.0503386	-542.379	0	0	count	0
52672	COL6A4P1	0	COL6A4P1	FAIL	(Intercept)	-27.3	0.0503386	-542.379	0	0	count	0
52678	COL6A5	1	COL6A5	FAIL	(Intercept)	-27.3	0.0503386	-542.379	0	0	count	0
52711	COX7B2	0	COX7B2	FAIL	(Intercept)	-27.3	0.0503386	-542.379	0	0	count	0
52717	CPA3	0	CPA3	FAIL	(Intercept)	-27.3	0.0503386	-542.379	0	0	count	0
52732	CPN1	0	CPN1	FAIL	(Intercept)	-27.3	0.0503386	-542.379	0	0	count	0
52741	CPXCR1	0	CPXCR1	FAIL	(Intercept)	-27.3	0.0503386	-542.379	0	0	count	0
52744	CR381653.2	0	CR381653.2	FAIL	(Intercept)	-27.3	0.0503386	-542.379	0	0	count	0
52747	CR381670.1	0	CR381670.1	FAIL	(Intercept)	-27.3	0.0503386	-542.379	0	0	count	0
52753	CRHR2	3	CRHR2	FAIL	(Intercept)	-27.3	0.0503386	-542.379	0	0	count	0
52759	CRISP1	0	CRISP1	FAIL	(Intercept)	-27.3	0.0503386	-542.379	0	0	count	0
52762	CRTAM	1	CRTAM	FAIL	(Intercept)	-27.3	0.0503386	-542.379	0	0	count	0
52774	CRYM-AS1	2	CRYM-AS1	FAIL	(Intercept)	-27.3	0.0503386	-542.379	0	0	count	0
52786	CSF2RB	1	CSF2RB	FAIL	(Intercept)	-27.3	0.0503386	-542.379	0	0	count	0
52792	CSNK1A1P1	0	CSNK1A1P1	FAIL	(Intercept)	-27.3	0.0503386	-542.379	0	0	count	0
52801	CSRP3	1	CSRP3	FAIL	(Intercept)	-27.3	0.0503386	-542.379	0	0	count	0
52804	CST7	0	CST7	FAIL	(Intercept)	-27.3	0.0503386	-542.379	0	0	count	0
52807	CSTA	2	CSTA	FAIL	(Intercept)	-27.3	0.0503386	-542.379	0	0	count	0
52813	CTRC	0	CTRC	FAIL	(Intercept)	-27.3	0.0503386	-542.379	0	0	count	0
52828	CTXN2	0	CTXN2	FAIL	(Intercept)	-27.3	0.0503386	-542.379	0	0	count	0
52831	CTXND1	0	CTXND1	FAIL	(Intercept)	-27.3	0.0503386	-542.379	0	0	count	0
52837	CWH43	1	CWH43	FAIL	(Intercept)	-27.3	0.0503386	-542.379	0	0	count	0
52849	CXCL8	2	CXCL8	FAIL	(Intercept)	-27.3	0.0503386	-542.379	0	0	count	0
52867	CYLC2	0	CYLC2	FAIL	(Intercept)	-27.3	0.0503386	-542.379	0	0	count	0
52870	CYP19A1	0	CYP19A1	FAIL	(Intercept)	-27.3	0.0503386	-542.379	0	0	count	0
52873	CYP1B1	0	CYP1B1	FAIL	(Intercept)	-27.3	0.0503386	-542.379	0	0	count	0
52876	CYP1B1-AS1	1	CYP1B1-AS1	FAIL	(Intercept)	-27.3	0.0503386	-542.379	0	0	count	0
52879	CYP26A1	3	CYP26A1	FAIL	(Intercept)	-27.3	0.0503386	-542.379	0	0	count	0
52882	CYP26C1	0	CYP26C1	FAIL	(Intercept)	-27.3	0.0503386	-542.379	0	0	count	0
52894	CYP4A22-AS1	0	CYP4A22-AS1	FAIL	(Intercept)	-27.3	0.0503386	-542.379	0	0	count	0
52897	CYSLTR1	0	CYSLTR1	FAIL	(Intercept)	-27.3	0.0503386	-542.379	0	0	count	0
52900	CYSLTR2	0	CYSLTR2	FAIL	(Intercept)	-27.3	0.0503386	-542.379	0	0	count	0
52906	CYTIP	2	CYTIP	FAIL	(Intercept)	-27.3	0.0503386	-542.379	0	0	count	0
52912	CYTOR	0	CYTOR	FAIL	(Intercept)	-27.3	0.0503386	-542.379	0	0	count	0
52918	CYYR1-AS1	0	CYYR1-AS1	FAIL	(Intercept)	-27.3	0.0503386	-542.379	0	0	count	0
52921	DAB1-AS1	0	DAB1-AS1	FAIL	(Intercept)	-27.3	0.0503386	-542.379	0	0	count	0
52933	DAOA-AS1	0	DAOA-AS1	FAIL	(Intercept)	-27.3	0.0503386	-542.379	0	0	count	0
52939	DAZL	0	DAZL	FAIL	(Intercept)	-27.3	0.0503386	-542.379	0	0	count	0
52948	DCAF8L2	0	DCAF8L2	FAIL	(Intercept)	-27.3	0.0503386	-542.379	0	0	count	0
52951	DCDC2C	0	DCDC2C	FAIL	(Intercept)	-27.3	0.0503386	-542.379	0	0	count	0
52957	DCLK3	0	DCLK3	FAIL	(Intercept)	-27.3	0.0503386	-542.379	0	0	count	0
52969	DDC	0	DDC	FAIL	(Intercept)	-27.3	0.0503386	-542.379	0	0	count	0
52975	DDN-AS1	0	DDN-AS1	FAIL	(Intercept)	-27.3	0.0503386	-542.379	0	0	count	0
52984	DDX53	0	DDX53	FAIL	(Intercept)	-27.3	0.0503386	-542.379	0	0	count	0
52987	DDX55P1	0	DDX55P1	FAIL	(Intercept)	-27.3	0.0503386	-542.379	0	0	count	0
52993	DEFB130D	0	DEFB130D	FAIL	(Intercept)	-27.3	0.0503386	-542.379	0	0	count	0
52999	DENND2D	4	DENND2D	FAIL	(Intercept)	-27.3	0.0503386	-542.379	0	0	count	0
53002	DENND5B-AS1	0	DENND5B-AS1	FAIL	(Intercept)	-27.3	0.0503386	-542.379	0	0	count	0
53023	DGKK	0	DGKK	FAIL	(Intercept)	-27.3	0.0503386	-542.379	0	0	count	0
53026	DGUOK-AS1	0	DGUOK-AS1	FAIL	(Intercept)	-27.3	0.0503386	-542.379	0	0	count	0
53053	DIAPH3-AS1	0	DIAPH3-AS1	FAIL	(Intercept)	-27.3	0.0503386	-542.379	0	0	count	0
53074	DIRC3-AS1	0	DIRC3-AS1	FAIL	(Intercept)	-27.3	0.0503386	-542.379	0	0	count	0
53077	DISC1-IT1	0	DISC1-IT1	FAIL	(Intercept)	-27.3	0.0503386	-542.379	0	0	count	0
53107	DMRT1	0	DMRT1	FAIL	(Intercept)	-27.3	0.0503386	-542.379	0	0	count	0
53110	DMRT3	0	DMRT3	FAIL	(Intercept)	-27.3	0.0503386	-542.379	0	0	count	0
53155	DPP10-AS1	0	DPP10-AS1	FAIL	(Intercept)	-27.3	0.0503386	-542.379	0	0	count	0
53161	DPY19L2P1	3	DPY19L2P1	FAIL	(Intercept)	-27.3	0.0503386	-542.379	0	0	count	0
53167	DSC1	0	DSC1	FAIL	(Intercept)	-27.3	0.0503386	-542.379	0	0	count	0
53179	DSCR8	1	DSCR8	FAIL	(Intercept)	-27.3	0.0503386	-542.379	0	0	count	0
53185	DSG1-AS1	0	DSG1-AS1	FAIL	(Intercept)	-27.3	0.0503386	-542.379	0	0	count	0
53191	DSG4	0	DSG4	FAIL	(Intercept)	-27.3	0.0503386	-542.379	0	0	count	0
53194	DSP	0	DSP	FAIL	(Intercept)	-27.3	0.0503386	-542.379	0	0	count	0
53215	DUTP6	0	DUTP6	FAIL	(Intercept)	-27.3	0.0503386	-542.379	0	0	count	0
53218	DUXAP8	0	DUXAP8	FAIL	(Intercept)	-27.3	0.0503386	-542.379	0	0	count	0
53236	E2F7	2	E2F7	FAIL	(Intercept)	-27.3	0.0503386	-542.379	0	0	count	0
53239	EAF1-AS1	0	EAF1-AS1	FAIL	(Intercept)	-27.3	0.0503386	-542.379	0	0	count	0
53248	EBF3	0	EBF3	FAIL	(Intercept)	-27.3	0.0503386	-542.379	0	0	count	0
53260	EDDM13	0	EDDM13	FAIL	(Intercept)	-27.3	0.0503386	-542.379	0	0	count	0
53275	EEF1B2P1	0	EEF1B2P1	FAIL	(Intercept)	-27.3	0.0503386	-542.379	0	0	count	0
53278	EEF1DP5	0	EEF1DP5	FAIL	(Intercept)	-27.3	0.0503386	-542.379	0	0	count	0
53317	EIF2S2P2	0	EIF2S2P2	FAIL	(Intercept)	-27.3	0.0503386	-542.379	0	0	count	0
53320	EIF2S2P3	0	EIF2S2P3	FAIL	(Intercept)	-27.3	0.0503386	-542.379	0	0	count	0
53323	EIF3FP3	0	EIF3FP3	FAIL	(Intercept)	-27.3	0.0503386	-542.379	0	0	count	0
53326	ELDR	0	ELDR	FAIL	(Intercept)	-27.3	0.0503386	-542.379	0	0	count	0
53335	ELMO1-AS1	0	ELMO1-AS1	FAIL	(Intercept)	-27.3	0.0503386	-542.379	0	0	count	0
53341	ELOCP19	0	ELOCP19	FAIL	(Intercept)	-27.3	0.0503386	-542.379	0	0	count	0
53347	EMBP1	0	EMBP1	FAIL	(Intercept)	-27.3	0.0503386	-542.379	0	0	count	0
53380	ENPP7P10	0	ENPP7P10	FAIL	(Intercept)	-27.3	0.0503386	-542.379	0	0	count	0
53383	ENPP7P2	0	ENPP7P2	FAIL	(Intercept)	-27.3	0.0503386	-542.379	0	0	count	0
53389	ENPP7P5	0	ENPP7P5	FAIL	(Intercept)	-27.3	0.0503386	-542.379	0	0	count	0
53392	ENPP7P8	0	ENPP7P8	FAIL	(Intercept)	-27.3	0.0503386	-542.379	0	0	count	0
53395	ENTHD1	0	ENTHD1	FAIL	(Intercept)	-27.3	0.0503386	-542.379	0	0	count	0
53404	EPHA1	0	EPHA1	FAIL	(Intercept)	-27.3	0.0503386	-542.379	0	0	count	0
53422	EPHX3	0	EPHX3	FAIL	(Intercept)	-27.3	0.0503386	-542.379	0	0	count	0
53434	EPYC	0	EPYC	FAIL	(Intercept)	-27.3	0.0503386	-542.379	0	0	count	0
53443	ERICH3-AS1	0	ERICH3-AS1	FAIL	(Intercept)	-27.3	0.0503386	-542.379	0	0	count	0
53446	ERICH5	0	ERICH5	FAIL	(Intercept)	-27.3	0.0503386	-542.379	0	0	count	0
53458	ERP27	0	ERP27	FAIL	(Intercept)	-27.3	0.0503386	-542.379	0	0	count	0
53476	EVA1B	0	EVA1B	FAIL	(Intercept)	-27.3	0.0503386	-542.379	0	0	count	0
53479	EVC2	0	EVC2	FAIL	(Intercept)	-27.3	0.0503386	-542.379	0	0	count	0
53482	EWSAT1	0	EWSAT1	FAIL	(Intercept)	-27.3	0.0503386	-542.379	0	0	count	0
53512	F2RL1	0	F2RL1	FAIL	(Intercept)	-27.3	0.0503386	-542.379	0	0	count	0
53518	F9	0	F9	FAIL	(Intercept)	-27.3	0.0503386	-542.379	0	0	count	0
53542	FAM111A-DT	0	FAM111A-DT	FAIL	(Intercept)	-27.3	0.0503386	-542.379	0	0	count	0
53557	FAM169B	0	FAM169B	FAIL	(Intercept)	-27.3	0.0503386	-542.379	0	0	count	0
53563	FAM186B	0	FAM186B	FAIL	(Intercept)	-27.3	0.0503386	-542.379	0	0	count	0
53578	FAM242A	0	FAM242A	FAIL	(Intercept)	-27.3	0.0503386	-542.379	0	0	count	0
53584	FAM242D	0	FAM242D	FAIL	(Intercept)	-27.3	0.0503386	-542.379	0	0	count	0
53587	FAM245A	0	FAM245A	FAIL	(Intercept)	-27.3	0.0503386	-542.379	0	0	count	0
53590	FAM3D	0	FAM3D	FAIL	(Intercept)	-27.3	0.0503386	-542.379	0	0	count	0
53593	FAM3D-AS1	0	FAM3D-AS1	FAIL	(Intercept)	-27.3	0.0503386	-542.379	0	0	count	0
53599	FAM71A	0	FAM71A	FAIL	(Intercept)	-27.3	0.0503386	-542.379	0	0	count	0
53605	FAM72B	0	FAM72B	FAIL	(Intercept)	-27.3	0.0503386	-542.379	0	0	count	0
53608	FAM72D	0	FAM72D	FAIL	(Intercept)	-27.3	0.0503386	-542.379	0	0	count	0
53617	FAM81B	0	FAM81B	FAIL	(Intercept)	-27.3	0.0503386	-542.379	0	0	count	0
53620	FAM83B	3	FAM83B	FAIL	(Intercept)	-27.3	0.0503386	-542.379	0	0	count	0
53623	FAM83E	0	FAM83E	FAIL	(Intercept)	-27.3	0.0503386	-542.379	0	0	count	0
53629	FAM86EP	0	FAM86EP	FAIL	(Intercept)	-27.3	0.0503386	-542.379	0	0	count	0
53635	FAM9B	1	FAM9B	FAIL	(Intercept)	-27.3	0.0503386	-542.379	0	0	count	0
53659	FBP1	1	FBP1	FAIL	(Intercept)	-27.3	0.0503386	-542.379	0	0	count	0
53662	FBXL21P	0	FBXL21P	FAIL	(Intercept)	-27.3	0.0503386	-542.379	0	0	count	0
53671	FBXO47	0	FBXO47	FAIL	(Intercept)	-27.3	0.0503386	-542.379	0	0	count	0
53680	FCAR	18	FCAR	FAIL	(Intercept)	-27.3	0.0503386	-542.379	0	0	count	0
53695	FCGR1CP	0	FCGR1CP	FAIL	(Intercept)	-27.3	0.0503386	-542.379	0	0	count	0
53698	FCGR2B	1	FCGR2B	FAIL	(Intercept)	-27.3	0.0503386	-542.379	0	0	count	0
53716	FCRL5	0	FCRL5	FAIL	(Intercept)	-27.3	0.0503386	-542.379	0	0	count	0
53722	FER1L5	1	FER1L5	FAIL	(Intercept)	-27.3	0.0503386	-542.379	0	0	count	0
53725	FER1L6	0	FER1L6	FAIL	(Intercept)	-27.3	0.0503386	-542.379	0	0	count	0
53728	FER1L6-AS2	0	FER1L6-AS2	FAIL	(Intercept)	-27.3	0.0503386	-542.379	0	0	count	0
53740	FFAR4	2	FFAR4	FAIL	(Intercept)	-27.3	0.0503386	-542.379	0	0	count	0
53752	FGF14-AS1	0	FGF14-AS1	FAIL	(Intercept)	-27.3	0.0503386	-542.379	0	0	count	0
53764	FGF5	14	FGF5	FAIL	(Intercept)	-27.3	0.0503386	-542.379	0	0	count	0
53770	FGF7P3	0	FGF7P3	FAIL	(Intercept)	-27.3	0.0503386	-542.379	0	0	count	0
53791	FHL5	0	FHL5	FAIL	(Intercept)	-27.3	0.0503386	-542.379	0	0	count	0
53797	FILNC1	0	FILNC1	FAIL	(Intercept)	-27.3	0.0503386	-542.379	0	0	count	0
53803	FLG	0	FLG	FAIL	(Intercept)	-27.3	0.0503386	-542.379	0	0	count	0
53824	FMO1	0	FMO1	FAIL	(Intercept)	-27.3	0.0503386	-542.379	0	0	count	0
53836	FMO7P	0	FMO7P	FAIL	(Intercept)	-27.3	0.0503386	-542.379	0	0	count	0
53839	FMR1NB	0	FMR1NB	FAIL	(Intercept)	-27.3	0.0503386	-542.379	0	0	count	0
53842	FO393401.1	0	FO393401.1	FAIL	(Intercept)	-27.3	0.0503386	-542.379	0	0	count	0
53845	FOLR1	1	FOLR1	FAIL	(Intercept)	-27.3	0.0503386	-542.379	0	0	count	0
53857	FOXB1	0	FOXB1	FAIL	(Intercept)	-27.3	0.0503386	-542.379	0	0	count	0
53869	FP236383.1	0	FP236383.1	FAIL	(Intercept)	-27.3	0.0503386	-542.379	0	0	count	0
53872	FP325335.1	0	FP325335.1	FAIL	(Intercept)	-27.3	0.0503386	-542.379	0	0	count	0
53875	FP700111.1	0	FP700111.1	FAIL	(Intercept)	-27.3	0.0503386	-542.379	0	0	count	0
53881	FPR3	0	FPR3	FAIL	(Intercept)	-27.3	0.0503386	-542.379	0	0	count	0
53890	FRG1FP	0	FRG1FP	FAIL	(Intercept)	-27.3	0.0503386	-542.379	0	0	count	0
53893	FRG2IP	0	FRG2IP	FAIL	(Intercept)	-27.3	0.0503386	-542.379	0	0	count	0
53899	FRMD6-AS2	0	FRMD6-AS2	FAIL	(Intercept)	-27.3	0.0503386	-542.379	0	0	count	0
53905	FRRS1	0	FRRS1	FAIL	(Intercept)	-27.3	0.0503386	-542.379	0	0	count	0
53932	FZD2	20	FZD2	FAIL	(Intercept)	-27.3	0.0503386	-542.379	0	0	count	0
53959	GABRA6	0	GABRA6	FAIL	(Intercept)	-27.3	0.0503386	-542.379	0	0	count	0
53971	GABRR3	0	GABRR3	FAIL	(Intercept)	-27.3	0.0503386	-542.379	0	0	count	0
53995	GAPDHP61	0	GAPDHP61	FAIL	(Intercept)	-27.3	0.0503386	-542.379	0	0	count	0
54001	GAPDHP71	0	GAPDHP71	FAIL	(Intercept)	-27.3	0.0503386	-542.379	0	0	count	0
54004	GAPT	0	GAPT	FAIL	(Intercept)	-27.3	0.0503386	-542.379	0	0	count	0
54016	GATA4	0	GATA4	FAIL	(Intercept)	-27.3	0.0503386	-542.379	0	0	count	0
54034	GBP7	0	GBP7	FAIL	(Intercept)	-27.3	0.0503386	-542.379	0	0	count	0
54037	GC	0	GC	FAIL	(Intercept)	-27.3	0.0503386	-542.379	0	0	count	0
54040	GCH1	0	GCH1	FAIL	(Intercept)	-27.3	0.0503386	-542.379	0	0	count	0
54046	GCNT3	0	GCNT3	FAIL	(Intercept)	-27.3	0.0503386	-542.379	0	0	count	0
54058	GCSAML	0	GCSAML	FAIL	(Intercept)	-27.3	0.0503386	-542.379	0	0	count	0
54076	GFI1B	0	GFI1B	FAIL	(Intercept)	-27.3	0.0503386	-542.379	0	0	count	0
54097	GIMAP1-GIMAP5	0	GIMAP1-GIMAP5	FAIL	(Intercept)	-27.3	0.0503386	-542.379	0	0	count	0
54103	GIMAP4	3	GIMAP4	FAIL	(Intercept)	-27.3	0.0503386	-542.379	0	0	count	0
54106	GIMAP5	0	GIMAP5	FAIL	(Intercept)	-27.3	0.0503386	-542.379	0	0	count	0
54118	GIMD1	0	GIMD1	FAIL	(Intercept)	-27.3	0.0503386	-542.379	0	0	count	0
54121	GIPC3	1	GIPC3	FAIL	(Intercept)	-27.3	0.0503386	-542.379	0	0	count	0
54124	GJA3	0	GJA3	FAIL	(Intercept)	-27.3	0.0503386	-542.379	0	0	count	0
54127	GJA5	2	GJA5	FAIL	(Intercept)	-27.3	0.0503386	-542.379	0	0	count	0
54130	GJB7	0	GJB7	FAIL	(Intercept)	-27.3	0.0503386	-542.379	0	0	count	0
54157	GLYATL3	0	GLYATL3	FAIL	(Intercept)	-27.3	0.0503386	-542.379	0	0	count	0
54160	GMCL2	0	GMCL2	FAIL	(Intercept)	-27.3	0.0503386	-542.379	0	0	count	0
54169	GNA14-AS1	0	GNA14-AS1	FAIL	(Intercept)	-27.3	0.0503386	-542.379	0	0	count	0
54175	GNAT2	0	GNAT2	FAIL	(Intercept)	-27.3	0.0503386	-542.379	0	0	count	0
54178	GNAT3	0	GNAT3	FAIL	(Intercept)	-27.3	0.0503386	-542.379	0	0	count	0
54184	GNG12-AS1	3	GNG12-AS1	FAIL	(Intercept)	-27.3	0.0503386	-542.379	0	0	count	0
54199	GNRHR	2	GNRHR	FAIL	(Intercept)	-27.3	0.0503386	-542.379	0	0	count	0
54202	GOLGA6B	0	GOLGA6B	FAIL	(Intercept)	-27.3	0.0503386	-542.379	0	0	count	0
54211	GORAB-AS1	0	GORAB-AS1	FAIL	(Intercept)	-27.3	0.0503386	-542.379	0	0	count	0
54214	GPA33	0	GPA33	FAIL	(Intercept)	-27.3	0.0503386	-542.379	0	0	count	0
54223	GPC6-AS1	0	GPC6-AS1	FAIL	(Intercept)	-27.3	0.0503386	-542.379	0	0	count	0
54226	GPC6-AS2	1	GPC6-AS2	FAIL	(Intercept)	-27.3	0.0503386	-542.379	0	0	count	0
54253	GPR158-AS1	0	GPR158-AS1	FAIL	(Intercept)	-27.3	0.0503386	-542.379	0	0	count	0
54265	GPR171	0	GPR171	FAIL	(Intercept)	-27.3	0.0503386	-542.379	0	0	count	0
54268	GPR174	0	GPR174	FAIL	(Intercept)	-27.3	0.0503386	-542.379	0	0	count	0
54286	GPR84	0	GPR84	FAIL	(Intercept)	-27.3	0.0503386	-542.379	0	0	count	0
54292	GPRC5D-AS1	0	GPRC5D-AS1	FAIL	(Intercept)	-27.3	0.0503386	-542.379	0	0	count	0
54298	GPX1P2	0	GPX1P2	FAIL	(Intercept)	-27.3	0.0503386	-542.379	0	0	count	0
54304	GRHL3	0	GRHL3	FAIL	(Intercept)	-27.3	0.0503386	-542.379	0	0	count	0
54331	GRM7-AS3	0	GRM7-AS3	FAIL	(Intercept)	-27.3	0.0503386	-542.379	0	0	count	0
54334	GRXCR1	0	GRXCR1	FAIL	(Intercept)	-27.3	0.0503386	-542.379	0	0	count	0
54346	GSTA3	0	GSTA3	FAIL	(Intercept)	-27.3	0.0503386	-542.379	0	0	count	0
54349	GTF2A1L	0	GTF2A1L	FAIL	(Intercept)	-27.3	0.0503386	-542.379	0	0	count	0
54358	GTF2IP2	0	GTF2IP2	FAIL	(Intercept)	-27.3	0.0503386	-542.379	0	0	count	0
54364	GTF2IRD1P1	1	GTF2IRD1P1	FAIL	(Intercept)	-27.3	0.0503386	-542.379	0	0	count	0
54373	GUCY1A1	0	GUCY1A1	FAIL	(Intercept)	-27.3	0.0503386	-542.379	0	0	count	0
54376	GUCY1B2	0	GUCY1B2	FAIL	(Intercept)	-27.3	0.0503386	-542.379	0	0	count	0
54382	GUCY2EP	1	GUCY2EP	FAIL	(Intercept)	-27.3	0.0503386	-542.379	0	0	count	0
54385	GUCY2F	1	GUCY2F	FAIL	(Intercept)	-27.3	0.0503386	-542.379	0	0	count	0
54388	GUCY2GP	0	GUCY2GP	FAIL	(Intercept)	-27.3	0.0503386	-542.379	0	0	count	0
54391	GULOP	0	GULOP	FAIL	(Intercept)	-27.3	0.0503386	-542.379	0	0	count	0
54394	GUSBP6	0	GUSBP6	FAIL	(Intercept)	-27.3	0.0503386	-542.379	0	0	count	0
54403	GYG2P1	0	GYG2P1	FAIL	(Intercept)	-27.3	0.0503386	-542.379	0	0	count	0
54406	GYPA	5	GYPA	FAIL	(Intercept)	-27.3	0.0503386	-542.379	0	0	count	0
54409	GYPB	3	GYPB	FAIL	(Intercept)	-27.3	0.0503386	-542.379	0	0	count	0
54421	GZMAP1	0	GZMAP1	FAIL	(Intercept)	-27.3	0.0503386	-542.379	0	0	count	0
54424	GZMK	0	GZMK	FAIL	(Intercept)	-27.3	0.0503386	-542.379	0	0	count	0
54430	HACD4	0	HACD4	FAIL	(Intercept)	-27.3	0.0503386	-542.379	0	0	count	0
54439	HAO1	0	HAO1	FAIL	(Intercept)	-27.3	0.0503386	-542.379	0	0	count	0
54442	HAO2	0	HAO2	FAIL	(Intercept)	-27.3	0.0503386	-542.379	0	0	count	0
54472	HCN4	2	HCN4	FAIL	(Intercept)	-27.3	0.0503386	-542.379	0	0	count	0
54475	HCP5	0	HCP5	FAIL	(Intercept)	-27.3	0.0503386	-542.379	0	0	count	0
54490	HELLPAR	0	HELLPAR	FAIL	(Intercept)	-27.3	0.0503386	-542.379	0	0	count	0
54511	HHIPL2	0	HHIPL2	FAIL	(Intercept)	-27.3	0.0503386	-542.379	0	0	count	0
54520	HIF1A-AS1	0	HIF1A-AS1	FAIL	(Intercept)	-27.3	0.0503386	-542.379	0	0	count	0
54529	HIST1H2AD	2	HIST1H2AD	FAIL	(Intercept)	-27.3	0.0503386	-542.379	0	0	count	0
54532	HIST1H2BC	0	HIST1H2BC	FAIL	(Intercept)	-27.3	0.0503386	-542.379	0	0	count	0
54541	HIST1H3D	0	HIST1H3D	FAIL	(Intercept)	-27.3	0.0503386	-542.379	0	0	count	0
54550	HJV	0	HJV	FAIL	(Intercept)	-27.3	0.0503386	-542.379	0	0	count	0
54553	HK3	0	HK3	FAIL	(Intercept)	-27.3	0.0503386	-542.379	0	0	count	0
54562	HLA-DOA	0	HLA-DOA	FAIL	(Intercept)	-27.3	0.0503386	-542.379	0	0	count	0
54574	HLA-DQA2	1	HLA-DQA2	FAIL	(Intercept)	-27.3	0.0503386	-542.379	0	0	count	0
54580	HLA-DQB2	0	HLA-DQB2	FAIL	(Intercept)	-27.3	0.0503386	-542.379	0	0	count	0
54592	HLA-DRB6	1	HLA-DRB6	FAIL	(Intercept)	-27.3	0.0503386	-542.379	0	0	count	0
54598	HLA-F-AS1	0	HLA-F-AS1	FAIL	(Intercept)	-27.3	0.0503386	-542.379	0	0	count	0
54601	HLA-G	2	HLA-G	FAIL	(Intercept)	-27.3	0.0503386	-542.379	0	0	count	0
54616	HMGA2-AS1	0	HMGA2-AS1	FAIL	(Intercept)	-27.3	0.0503386	-542.379	0	0	count	0
54619	HMGB1P12	0	HMGB1P12	FAIL	(Intercept)	-27.3	0.0503386	-542.379	0	0	count	0
54622	HMGB1P3	0	HMGB1P3	FAIL	(Intercept)	-27.3	0.0503386	-542.379	0	0	count	0
54628	HMGB1P49	0	HMGB1P49	FAIL	(Intercept)	-27.3	0.0503386	-542.379	0	0	count	0
54631	HMGB3P5	0	HMGB3P5	FAIL	(Intercept)	-27.3	0.0503386	-542.379	0	0	count	0
54649	HNF1B	0	HNF1B	FAIL	(Intercept)	-27.3	0.0503386	-542.379	0	0	count	0
54658	HNRNPA1P54	0	HNRNPA1P54	FAIL	(Intercept)	-27.3	0.0503386	-542.379	0	0	count	0
54661	HNRNPA1P57	0	HNRNPA1P57	FAIL	(Intercept)	-27.3	0.0503386	-542.379	0	0	count	0
54667	HNRNPUP1	0	HNRNPUP1	FAIL	(Intercept)	-27.3	0.0503386	-542.379	0	0	count	0
54673	HORMAD1	0	HORMAD1	FAIL	(Intercept)	-27.3	0.0503386	-542.379	0	0	count	0
54682	HOTAIRM1	0	HOTAIRM1	FAIL	(Intercept)	-27.3	0.0503386	-542.379	0	0	count	0
54685	HOXB2	0	HOXB2	FAIL	(Intercept)	-27.3	0.0503386	-542.379	0	0	count	0
54688	HOXB7	0	HOXB7	FAIL	(Intercept)	-27.3	0.0503386	-542.379	0	0	count	0
54691	HOXB-AS1	0	HOXB-AS1	FAIL	(Intercept)	-27.3	0.0503386	-542.379	0	0	count	0
54694	HOXB-AS3	0	HOXB-AS3	FAIL	(Intercept)	-27.3	0.0503386	-542.379	0	0	count	0
54697	HOXC4	0	HOXC4	FAIL	(Intercept)	-27.3	0.0503386	-542.379	0	0	count	0
54703	HPGD	8	HPGD	FAIL	(Intercept)	-27.3	0.0503386	-542.379	0	0	count	0
54706	HPGDS	4	HPGDS	FAIL	(Intercept)	-27.3	0.0503386	-542.379	0	0	count	0
54709	HPYR1	0	HPYR1	FAIL	(Intercept)	-27.3	0.0503386	-542.379	0	0	count	0
54715	HRG	0	HRG	FAIL	(Intercept)	-27.3	0.0503386	-542.379	0	0	count	0
54742	HSD17B2	0	HSD17B2	FAIL	(Intercept)	-27.3	0.0503386	-542.379	0	0	count	0
54751	HSPA12B	0	HSPA12B	FAIL	(Intercept)	-27.3	0.0503386	-542.379	0	0	count	0
54760	HSPD1P6	0	HSPD1P6	FAIL	(Intercept)	-27.3	0.0503386	-542.379	0	0	count	0
54775	HTR5BP	0	HTR5BP	FAIL	(Intercept)	-27.3	0.0503386	-542.379	0	0	count	0
54778	HTR7	0	HTR7	FAIL	(Intercept)	-27.3	0.0503386	-542.379	0	0	count	0
54784	HYAL4	2	HYAL4	FAIL	(Intercept)	-27.3	0.0503386	-542.379	0	0	count	0
54787	IATPR	0	IATPR	FAIL	(Intercept)	-27.3	0.0503386	-542.379	0	0	count	0
54790	IBSP	0	IBSP	FAIL	(Intercept)	-27.3	0.0503386	-542.379	0	0	count	0
54805	ICOS	1	ICOS	FAIL	(Intercept)	-27.3	0.0503386	-542.379	0	0	count	0
54814	IFI30	7	IFI30	FAIL	(Intercept)	-27.3	0.0503386	-542.379	0	0	count	0
54820	IFIT6P	0	IFIT6P	FAIL	(Intercept)	-27.3	0.0503386	-542.379	0	0	count	0
54835	IFITM9P	0	IFITM9P	FAIL	(Intercept)	-27.3	0.0503386	-542.379	0	0	count	0
54838	IFNG	0	IFNG	FAIL	(Intercept)	-27.3	0.0503386	-542.379	0	0	count	0
54841	IFNG-AS1	0	IFNG-AS1	FAIL	(Intercept)	-27.3	0.0503386	-542.379	0	0	count	0
54850	IGF2BP1	4	IGF2BP1	FAIL	(Intercept)	-27.3	0.0503386	-542.379	0	0	count	0
54856	IGFBP7-AS1	0	IGFBP7-AS1	FAIL	(Intercept)	-27.3	0.0503386	-542.379	0	0	count	0
54862	IGKC	0	IGKC	FAIL	(Intercept)	-27.3	0.0503386	-542.379	0	0	count	0
54886	IL10	4	IL10	FAIL	(Intercept)	-27.3	0.0503386	-542.379	0	0	count	0
54913	IL18R1	0	IL18R1	FAIL	(Intercept)	-27.3	0.0503386	-542.379	0	0	count	0
54916	IL1A	1	IL1A	FAIL	(Intercept)	-27.3	0.0503386	-542.379	0	0	count	0
54928	IL1RL2	0	IL1RL2	FAIL	(Intercept)	-27.3	0.0503386	-542.379	0	0	count	0
54931	IL1RN	2	IL1RN	FAIL	(Intercept)	-27.3	0.0503386	-542.379	0	0	count	0
54937	IL21	0	IL21	FAIL	(Intercept)	-27.3	0.0503386	-542.379	0	0	count	0
54940	IL21R	0	IL21R	FAIL	(Intercept)	-27.3	0.0503386	-542.379	0	0	count	0
54943	IL22RA2	0	IL22RA2	FAIL	(Intercept)	-27.3	0.0503386	-542.379	0	0	count	0
54946	IL23A	2	IL23A	FAIL	(Intercept)	-27.3	0.0503386	-542.379	0	0	count	0
54949	IL23R	0	IL23R	FAIL	(Intercept)	-27.3	0.0503386	-542.379	0	0	count	0
54952	IL25	0	IL25	FAIL	(Intercept)	-27.3	0.0503386	-542.379	0	0	count	0
54955	IL26	0	IL26	FAIL	(Intercept)	-27.3	0.0503386	-542.379	0	0	count	0
54958	IL2RA	0	IL2RA	FAIL	(Intercept)	-27.3	0.0503386	-542.379	0	0	count	0
54961	IL2RB	0	IL2RB	FAIL	(Intercept)	-27.3	0.0503386	-542.379	0	0	count	0
54964	IL2RG	0	IL2RG	FAIL	(Intercept)	-27.3	0.0503386	-542.379	0	0	count	0
54967	IL31RA	0	IL31RA	FAIL	(Intercept)	-27.3	0.0503386	-542.379	0	0	count	0
54985	IL7R	1	IL7R	FAIL	(Intercept)	-27.3	0.0503386	-542.379	0	0	count	0
54994	IMPA1P1	0	IMPA1P1	FAIL	(Intercept)	-27.3	0.0503386	-542.379	0	0	count	0
55015	INKA1	0	INKA1	FAIL	(Intercept)	-27.3	0.0503386	-542.379	0	0	count	0
55021	INSC	1	INSC	FAIL	(Intercept)	-27.3	0.0503386	-542.379	0	0	count	0
55033	IQANK1	0	IQANK1	FAIL	(Intercept)	-27.3	0.0503386	-542.379	0	0	count	0
55063	IRF6	1	IRF6	FAIL	(Intercept)	-27.3	0.0503386	-542.379	0	0	count	0
55072	ISL1	0	ISL1	FAIL	(Intercept)	-27.3	0.0503386	-542.379	0	0	count	0
55078	ISM1-AS1	0	ISM1-AS1	FAIL	(Intercept)	-27.3	0.0503386	-542.379	0	0	count	0
55081	ISPD-AS1	0	ISPD-AS1	FAIL	(Intercept)	-27.3	0.0503386	-542.379	0	0	count	0
55096	ITGA5	2	ITGA5	FAIL	(Intercept)	-27.3	0.0503386	-542.379	0	0	count	0
55108	ITGB1-DT	0	ITGB1-DT	FAIL	(Intercept)	-27.3	0.0503386	-542.379	0	0	count	0
55114	ITGB2-AS1	1	ITGB2-AS1	FAIL	(Intercept)	-27.3	0.0503386	-542.379	0	0	count	0
55117	ITGB6	0	ITGB6	FAIL	(Intercept)	-27.3	0.0503386	-542.379	0	0	count	0
55129	ITIH6	0	ITIH6	FAIL	(Intercept)	-27.3	0.0503386	-542.379	0	0	count	0
55138	ITPRIPL2	4	ITPRIPL2	FAIL	(Intercept)	-27.3	0.0503386	-542.379	0	0	count	0
55141	IYD	0	IYD	FAIL	(Intercept)	-27.3	0.0503386	-542.379	0	0	count	0
55156	JAML	0	JAML	FAIL	(Intercept)	-27.3	0.0503386	-542.379	0	0	count	0
55162	JHY	1	JHY	FAIL	(Intercept)	-27.3	0.0503386	-542.379	0	0	count	0
55171	KATNBL1P6	0	KATNBL1P6	FAIL	(Intercept)	-27.3	0.0503386	-542.379	0	0	count	0
55195	KCNE3	4	KCNE3	FAIL	(Intercept)	-27.3	0.0503386	-542.379	0	0	count	0
55225	KCNMA1-AS1	0	KCNMA1-AS1	FAIL	(Intercept)	-27.3	0.0503386	-542.379	0	0	count	0
55249	KCNU1	0	KCNU1	FAIL	(Intercept)	-27.3	0.0503386	-542.379	0	0	count	0
55258	KCTD19	0	KCTD19	FAIL	(Intercept)	-27.3	0.0503386	-542.379	0	0	count	0
55267	KHDRBS2-OT	0	KHDRBS2-OT	FAIL	(Intercept)	-27.3	0.0503386	-542.379	0	0	count	0
55276	KIAA1257	1	KIAA1257	FAIL	(Intercept)	-27.3	0.0503386	-542.379	0	0	count	0
55309	KIR2DL3	0	KIR2DL3	FAIL	(Intercept)	-27.3	0.0503386	-542.379	0	0	count	0
55312	KIR3DL2	0	KIR3DL2	FAIL	(Intercept)	-27.3	0.0503386	-542.379	0	0	count	0
55315	KIR3DX1	5	KIR3DX1	FAIL	(Intercept)	-27.3	0.0503386	-542.379	0	0	count	0
55348	KLRF2	0	KLRF2	FAIL	(Intercept)	-27.3	0.0503386	-542.379	0	0	count	0
55351	KNL1	0	KNL1	FAIL	(Intercept)	-27.3	0.0503386	-542.379	0	0	count	0
55354	KRT18P59	0	KRT18P59	FAIL	(Intercept)	-27.3	0.0503386	-542.379	0	0	count	0
55360	KRT8P12	0	KRT8P12	FAIL	(Intercept)	-27.3	0.0503386	-542.379	0	0	count	0
55366	L34079.1	0	L34079.1	FAIL	(Intercept)	-27.3	0.0503386	-542.379	0	0	count	0
55372	LAD1	0	LAD1	FAIL	(Intercept)	-27.3	0.0503386	-542.379	0	0	count	0
55381	LAMA3	0	LAMA3	FAIL	(Intercept)	-27.3	0.0503386	-542.379	0	0	count	0
55396	LAMC2	4	LAMC2	FAIL	(Intercept)	-27.3	0.0503386	-542.379	0	0	count	0
55420	LEF1-AS1	0	LEF1-AS1	FAIL	(Intercept)	-27.3	0.0503386	-542.379	0	0	count	0
55429	LEMD1-AS1	0	LEMD1-AS1	FAIL	(Intercept)	-27.3	0.0503386	-542.379	0	0	count	0
55435	LFNG	1	LFNG	FAIL	(Intercept)	-27.3	0.0503386	-542.379	0	0	count	0
55441	LGALS9C	1	LGALS9C	FAIL	(Intercept)	-27.3	0.0503386	-542.379	0	0	count	0
55444	LGALSL-DT	0	LGALSL-DT	FAIL	(Intercept)	-27.3	0.0503386	-542.379	0	0	count	0
55453	LHB	1	LHB	FAIL	(Intercept)	-27.3	0.0503386	-542.379	0	0	count	0
55456	LHCGR	0	LHCGR	FAIL	(Intercept)	-27.3	0.0503386	-542.379	0	0	count	0
55462	LHFPL3-AS1	0	LHFPL3-AS1	FAIL	(Intercept)	-27.3	0.0503386	-542.379	0	0	count	0
55468	LHX9	0	LHX9	FAIL	(Intercept)	-27.3	0.0503386	-542.379	0	0	count	0
55471	LILRA1	0	LILRA1	FAIL	(Intercept)	-27.3	0.0503386	-542.379	0	0	count	0
55474	LILRA2	0	LILRA2	FAIL	(Intercept)	-27.3	0.0503386	-542.379	0	0	count	0
55477	LILRA4	1	LILRA4	FAIL	(Intercept)	-27.3	0.0503386	-542.379	0	0	count	0
55480	LILRB1	0	LILRB1	FAIL	(Intercept)	-27.3	0.0503386	-542.379	0	0	count	0
55483	LILRB2	0	LILRB2	FAIL	(Intercept)	-27.3	0.0503386	-542.379	0	0	count	0
55489	LILRB5	1	LILRB5	FAIL	(Intercept)	-27.3	0.0503386	-542.379	0	0	count	0
55501	LIMS3	0	LIMS3	FAIL	(Intercept)	-27.3	0.0503386	-542.379	0	0	count	0
55507	LIN28B-AS1	0	LIN28B-AS1	FAIL	(Intercept)	-27.3	0.0503386	-542.379	0	0	count	0
55522	LINC00173	3	LINC00173	FAIL	(Intercept)	-27.3	0.0503386	-542.379	0	0	count	0
55525	LINC00189	0	LINC00189	FAIL	(Intercept)	-27.3	0.0503386	-542.379	0	0	count	0
55531	LINC00242	0	LINC00242	FAIL	(Intercept)	-27.3	0.0503386	-542.379	0	0	count	0
55537	LINC00305	0	LINC00305	FAIL	(Intercept)	-27.3	0.0503386	-542.379	0	0	count	0
55540	LINC00309	1	LINC00309	FAIL	(Intercept)	-27.3	0.0503386	-542.379	0	0	count	0
55543	LINC00317	0	LINC00317	FAIL	(Intercept)	-27.3	0.0503386	-542.379	0	0	count	0
55549	LINC00347	0	LINC00347	FAIL	(Intercept)	-27.3	0.0503386	-542.379	0	0	count	0
55558	LINC00373	0	LINC00373	FAIL	(Intercept)	-27.3	0.0503386	-542.379	0	0	count	0
55564	LINC00395	0	LINC00395	FAIL	(Intercept)	-27.3	0.0503386	-542.379	0	0	count	0
55567	LINC00410	0	LINC00410	FAIL	(Intercept)	-27.3	0.0503386	-542.379	0	0	count	0
55570	LINC00430	0	LINC00430	FAIL	(Intercept)	-27.3	0.0503386	-542.379	0	0	count	0
55573	LINC00433	0	LINC00433	FAIL	(Intercept)	-27.3	0.0503386	-542.379	0	0	count	0
55576	LINC00446	0	LINC00446	FAIL	(Intercept)	-27.3	0.0503386	-542.379	0	0	count	0
55579	LINC00448	0	LINC00448	FAIL	(Intercept)	-27.3	0.0503386	-542.379	0	0	count	0
55585	LINC00466	0	LINC00466	FAIL	(Intercept)	-27.3	0.0503386	-542.379	0	0	count	0
55588	LINC00469	0	LINC00469	FAIL	(Intercept)	-27.3	0.0503386	-542.379	0	0	count	0
55591	LINC00474	0	LINC00474	FAIL	(Intercept)	-27.3	0.0503386	-542.379	0	0	count	0
55594	LINC00475	0	LINC00475	FAIL	(Intercept)	-27.3	0.0503386	-542.379	0	0	count	0
55597	LINC00482	0	LINC00482	FAIL	(Intercept)	-27.3	0.0503386	-542.379	0	0	count	0
55600	LINC00491	0	LINC00491	FAIL	(Intercept)	-27.3	0.0503386	-542.379	0	0	count	0
55609	LINC00519	0	LINC00519	FAIL	(Intercept)	-27.3	0.0503386	-542.379	0	0	count	0
55618	LINC00547	0	LINC00547	FAIL	(Intercept)	-27.3	0.0503386	-542.379	0	0	count	0
55624	LINC00558	0	LINC00558	FAIL	(Intercept)	-27.3	0.0503386	-542.379	0	0	count	0
55630	LINC00581	1	LINC00581	FAIL	(Intercept)	-27.3	0.0503386	-542.379	0	0	count	0
55633	LINC00582	0	LINC00582	FAIL	(Intercept)	-27.3	0.0503386	-542.379	0	0	count	0
55636	LINC00583	0	LINC00583	FAIL	(Intercept)	-27.3	0.0503386	-542.379	0	0	count	0
55642	LINC00588	0	LINC00588	FAIL	(Intercept)	-27.3	0.0503386	-542.379	0	0	count	0
55651	LINC00613	0	LINC00613	FAIL	(Intercept)	-27.3	0.0503386	-542.379	0	0	count	0
55654	LINC00616	0	LINC00616	FAIL	(Intercept)	-27.3	0.0503386	-542.379	0	0	count	0
55657	LINC00618	0	LINC00618	FAIL	(Intercept)	-27.3	0.0503386	-542.379	0	0	count	0
55660	LINC00621	0	LINC00621	FAIL	(Intercept)	-27.3	0.0503386	-542.379	0	0	count	0
55666	LINC00645	0	LINC00645	FAIL	(Intercept)	-27.3	0.0503386	-542.379	0	0	count	0
55678	LINC00683	0	LINC00683	FAIL	(Intercept)	-27.3	0.0503386	-542.379	0	0	count	0
55681	LINC00687	0	LINC00687	FAIL	(Intercept)	-27.3	0.0503386	-542.379	0	0	count	0
55684	LINC00698	0	LINC00698	FAIL	(Intercept)	-27.3	0.0503386	-542.379	0	0	count	0
55687	LINC00702	0	LINC00702	FAIL	(Intercept)	-27.3	0.0503386	-542.379	0	0	count	0
55690	LINC00703	0	LINC00703	FAIL	(Intercept)	-27.3	0.0503386	-542.379	0	0	count	0
55693	LINC00709	0	LINC00709	FAIL	(Intercept)	-27.3	0.0503386	-542.379	0	0	count	0
55702	LINC00842	0	LINC00842	FAIL	(Intercept)	-27.3	0.0503386	-542.379	0	0	count	0
55705	LINC00856	0	LINC00856	FAIL	(Intercept)	-27.3	0.0503386	-542.379	0	0	count	0
55717	LINC00911	0	LINC00911	FAIL	(Intercept)	-27.3	0.0503386	-542.379	0	0	count	0
55720	LINC00919	0	LINC00919	FAIL	(Intercept)	-27.3	0.0503386	-542.379	0	0	count	0
55726	LINC00922	0	LINC00922	FAIL	(Intercept)	-27.3	0.0503386	-542.379	0	0	count	0
55732	LINC00924	12	LINC00924	FAIL	(Intercept)	-27.3	0.0503386	-542.379	0	0	count	0
55747	LINC00939	1	LINC00939	FAIL	(Intercept)	-27.3	0.0503386	-542.379	0	0	count	0
55753	LINC00944	0	LINC00944	FAIL	(Intercept)	-27.3	0.0503386	-542.379	0	0	count	0
55759	LINC00968	0	LINC00968	FAIL	(Intercept)	-27.3	0.0503386	-542.379	0	0	count	0
55768	LINC00972	1	LINC00972	FAIL	(Intercept)	-27.3	0.0503386	-542.379	0	0	count	0
55771	LINC00989	0	LINC00989	FAIL	(Intercept)	-27.3	0.0503386	-542.379	0	0	count	0
55783	LINC01020	0	LINC01020	FAIL	(Intercept)	-27.3	0.0503386	-542.379	0	0	count	0
55786	LINC01033	0	LINC01033	FAIL	(Intercept)	-27.3	0.0503386	-542.379	0	0	count	0
55792	LINC01049	0	LINC01049	FAIL	(Intercept)	-27.3	0.0503386	-542.379	0	0	count	0
55795	LINC01055	2	LINC01055	FAIL	(Intercept)	-27.3	0.0503386	-542.379	0	0	count	0
55798	LINC01075	0	LINC01075	FAIL	(Intercept)	-27.3	0.0503386	-542.379	0	0	count	0
55807	LINC01095	0	LINC01095	FAIL	(Intercept)	-27.3	0.0503386	-542.379	0	0	count	0
55813	LINC01115	0	LINC01115	FAIL	(Intercept)	-27.3	0.0503386	-542.379	0	0	count	0
55819	LINC01133	3	LINC01133	FAIL	(Intercept)	-27.3	0.0503386	-542.379	0	0	count	0
55822	LINC01140	1	LINC01140	FAIL	(Intercept)	-27.3	0.0503386	-542.379	0	0	count	0
55828	LINC01145	0	LINC01145	FAIL	(Intercept)	-27.3	0.0503386	-542.379	0	0	count	0
55834	LINC01148	0	LINC01148	FAIL	(Intercept)	-27.3	0.0503386	-542.379	0	0	count	0
55843	LINC01163	0	LINC01163	FAIL	(Intercept)	-27.3	0.0503386	-542.379	0	0	count	0
55855	LINC01192	0	LINC01192	FAIL	(Intercept)	-27.3	0.0503386	-542.379	0	0	count	0
55858	LINC01194	0	LINC01194	FAIL	(Intercept)	-27.3	0.0503386	-542.379	0	0	count	0
55870	LINC01204	5	LINC01204	FAIL	(Intercept)	-27.3	0.0503386	-542.379	0	0	count	0
55879	LINC01209	17	LINC01209	FAIL	(Intercept)	-27.3	0.0503386	-542.379	0	0	count	0
55882	LINC01210	0	LINC01210	FAIL	(Intercept)	-27.3	0.0503386	-542.379	0	0	count	0
55888	LINC01228	0	LINC01228	FAIL	(Intercept)	-27.3	0.0503386	-542.379	0	0	count	0
55903	LINC01247	0	LINC01247	FAIL	(Intercept)	-27.3	0.0503386	-542.379	0	0	count	0
55906	LINC01248	0	LINC01248	FAIL	(Intercept)	-27.3	0.0503386	-542.379	0	0	count	0
55912	LINC01256	0	LINC01256	FAIL	(Intercept)	-27.3	0.0503386	-542.379	0	0	count	0
55915	LINC01258	0	LINC01258	FAIL	(Intercept)	-27.3	0.0503386	-542.379	0	0	count	0
55918	LINC01259	0	LINC01259	FAIL	(Intercept)	-27.3	0.0503386	-542.379	0	0	count	0
55927	LINC01282	0	LINC01282	FAIL	(Intercept)	-27.3	0.0503386	-542.379	0	0	count	0
55930	LINC01287	0	LINC01287	FAIL	(Intercept)	-27.3	0.0503386	-542.379	0	0	count	0
55933	LINC01288	0	LINC01288	FAIL	(Intercept)	-27.3	0.0503386	-542.379	0	0	count	0
55936	LINC01297	0	LINC01297	FAIL	(Intercept)	-27.3	0.0503386	-542.379	0	0	count	0
55942	LINC01307	0	LINC01307	FAIL	(Intercept)	-27.3	0.0503386	-542.379	0	0	count	0
55954	LINC01327	0	LINC01327	FAIL	(Intercept)	-27.3	0.0503386	-542.379	0	0	count	0
55957	LINC01331	0	LINC01331	FAIL	(Intercept)	-27.3	0.0503386	-542.379	0	0	count	0
55960	LINC01333	0	LINC01333	FAIL	(Intercept)	-27.3	0.0503386	-542.379	0	0	count	0
55963	LINC01335	0	LINC01335	FAIL	(Intercept)	-27.3	0.0503386	-542.379	0	0	count	0
55966	LINC01339	0	LINC01339	FAIL	(Intercept)	-27.3	0.0503386	-542.379	0	0	count	0
55975	LINC01360	0	LINC01360	FAIL	(Intercept)	-27.3	0.0503386	-542.379	0	0	count	0
55978	LINC01374	0	LINC01374	FAIL	(Intercept)	-27.3	0.0503386	-542.379	0	0	count	0
55981	LINC01375	0	LINC01375	FAIL	(Intercept)	-27.3	0.0503386	-542.379	0	0	count	0
55987	LINC01393	0	LINC01393	FAIL	(Intercept)	-27.3	0.0503386	-542.379	0	0	count	0
55990	LINC01399	0	LINC01399	FAIL	(Intercept)	-27.3	0.0503386	-542.379	0	0	count	0
56002	LINC01426	6	LINC01426	FAIL	(Intercept)	-27.3	0.0503386	-542.379	0	0	count	0
56014	LINC01440	0	LINC01440	FAIL	(Intercept)	-27.3	0.0503386	-542.379	0	0	count	0
56017	LINC01442	0	LINC01442	FAIL	(Intercept)	-27.3	0.0503386	-542.379	0	0	count	0
56020	LINC01446	1	LINC01446	FAIL	(Intercept)	-27.3	0.0503386	-542.379	0	0	count	0
56026	LINC01449	0	LINC01449	FAIL	(Intercept)	-27.3	0.0503386	-542.379	0	0	count	0
56029	LINC01455	0	LINC01455	FAIL	(Intercept)	-27.3	0.0503386	-542.379	0	0	count	0
56038	LINC01477	0	LINC01477	FAIL	(Intercept)	-27.3	0.0503386	-542.379	0	0	count	0
56041	LINC01478	1	LINC01478	FAIL	(Intercept)	-27.3	0.0503386	-542.379	0	0	count	0
56044	LINC01479	0	LINC01479	FAIL	(Intercept)	-27.3	0.0503386	-542.379	0	0	count	0
56059	LINC01492	2	LINC01492	FAIL	(Intercept)	-27.3	0.0503386	-542.379	0	0	count	0
56062	LINC01495	0	LINC01495	FAIL	(Intercept)	-27.3	0.0503386	-542.379	0	0	count	0
56065	LINC01497	0	LINC01497	FAIL	(Intercept)	-27.3	0.0503386	-542.379	0	0	count	0
56068	LINC01501	0	LINC01501	FAIL	(Intercept)	-27.3	0.0503386	-542.379	0	0	count	0
56077	LINC01508	0	LINC01508	FAIL	(Intercept)	-27.3	0.0503386	-542.379	0	0	count	0
56086	LINC01525	0	LINC01525	FAIL	(Intercept)	-27.3	0.0503386	-542.379	0	0	count	0
56092	LINC01533	0	LINC01533	FAIL	(Intercept)	-27.3	0.0503386	-542.379	0	0	count	0
56113	LINC01568	0	LINC01568	FAIL	(Intercept)	-27.3	0.0503386	-542.379	0	0	count	0
56116	LINC01571	0	LINC01571	FAIL	(Intercept)	-27.3	0.0503386	-542.379	0	0	count	0
56119	LINC01580	0	LINC01580	FAIL	(Intercept)	-27.3	0.0503386	-542.379	0	0	count	0
56131	LINC01609	0	LINC01609	FAIL	(Intercept)	-27.3	0.0503386	-542.379	0	0	count	0
56134	LINC01611	0	LINC01611	FAIL	(Intercept)	-27.3	0.0503386	-542.379	0	0	count	0
56140	LINC01653	0	LINC01653	FAIL	(Intercept)	-27.3	0.0503386	-542.379	0	0	count	0
56143	LINC01664	0	LINC01664	FAIL	(Intercept)	-27.3	0.0503386	-542.379	0	0	count	0
56149	LINC01677	0	LINC01677	FAIL	(Intercept)	-27.3	0.0503386	-542.379	0	0	count	0
56155	LINC01684	0	LINC01684	FAIL	(Intercept)	-27.3	0.0503386	-542.379	0	0	count	0
56158	LINC01692	0	LINC01692	FAIL	(Intercept)	-27.3	0.0503386	-542.379	0	0	count	0
56161	LINC01693	0	LINC01693	FAIL	(Intercept)	-27.3	0.0503386	-542.379	0	0	count	0
56170	LINC01701	0	LINC01701	FAIL	(Intercept)	-27.3	0.0503386	-542.379	0	0	count	0
56173	LINC01704	0	LINC01704	FAIL	(Intercept)	-27.3	0.0503386	-542.379	0	0	count	0
56176	LINC01706	0	LINC01706	FAIL	(Intercept)	-27.3	0.0503386	-542.379	0	0	count	0
56179	LINC01707	0	LINC01707	FAIL	(Intercept)	-27.3	0.0503386	-542.379	0	0	count	0
56182	LINC01708	0	LINC01708	FAIL	(Intercept)	-27.3	0.0503386	-542.379	0	0	count	0
56188	LINC01710	0	LINC01710	FAIL	(Intercept)	-27.3	0.0503386	-542.379	0	0	count	0
56191	LINC01712	0	LINC01712	FAIL	(Intercept)	-27.3	0.0503386	-542.379	0	0	count	0
56194	LINC01722	0	LINC01722	FAIL	(Intercept)	-27.3	0.0503386	-542.379	0	0	count	0
56203	LINC01748	0	LINC01748	FAIL	(Intercept)	-27.3	0.0503386	-542.379	0	0	count	0
56206	LINC01752	0	LINC01752	FAIL	(Intercept)	-27.3	0.0503386	-542.379	0	0	count	0
56209	LINC01753	0	LINC01753	FAIL	(Intercept)	-27.3	0.0503386	-542.379	0	0	count	0
56212	LINC01754	0	LINC01754	FAIL	(Intercept)	-27.3	0.0503386	-542.379	0	0	count	0
56215	LINC01762	0	LINC01762	FAIL	(Intercept)	-27.3	0.0503386	-542.379	0	0	count	0
56218	LINC01776	0	LINC01776	FAIL	(Intercept)	-27.3	0.0503386	-542.379	0	0	count	0
56221	LINC01780	0	LINC01780	FAIL	(Intercept)	-27.3	0.0503386	-542.379	0	0	count	0
56224	LINC01781	0	LINC01781	FAIL	(Intercept)	-27.3	0.0503386	-542.379	0	0	count	0
56233	LINC01790	0	LINC01790	FAIL	(Intercept)	-27.3	0.0503386	-542.379	0	0	count	0
56236	LINC01791	0	LINC01791	FAIL	(Intercept)	-27.3	0.0503386	-542.379	0	0	count	0
56239	LINC01798	0	LINC01798	FAIL	(Intercept)	-27.3	0.0503386	-542.379	0	0	count	0
56242	LINC01799	0	LINC01799	FAIL	(Intercept)	-27.3	0.0503386	-542.379	0	0	count	0
56248	LINC01812	0	LINC01812	FAIL	(Intercept)	-27.3	0.0503386	-542.379	0	0	count	0
56251	LINC01814	0	LINC01814	FAIL	(Intercept)	-27.3	0.0503386	-542.379	0	0	count	0
56254	LINC01817	0	LINC01817	FAIL	(Intercept)	-27.3	0.0503386	-542.379	0	0	count	0
56257	LINC01818	0	LINC01818	FAIL	(Intercept)	-27.3	0.0503386	-542.379	0	0	count	0
56260	LINC01819	0	LINC01819	FAIL	(Intercept)	-27.3	0.0503386	-542.379	0	0	count	0
56263	LINC01822	0	LINC01822	FAIL	(Intercept)	-27.3	0.0503386	-542.379	0	0	count	0
56269	LINC01841	0	LINC01841	FAIL	(Intercept)	-27.3	0.0503386	-542.379	0	0	count	0
[truncated: 96,686 more rows]

## Sheet: Study Fetal Zhong et al
row.names	gene_short_name	num_cells_expressed	gene_id	status	term	estimate	std_err	test_val	p_value	normalized_effect	model_component	q_value		Genes with a significant time component in the fetal time-point
51	A2MP1	50	A2MP1	OK	StudyFetal.Zhong.2018	-2.64267	0.474998	-5.5635	2.86e-08	-3.08023	count	0.000925296
93	AASS	445	AASS	OK	StudyFetal.Zhong.2018	1.77581	0.344126	5.1603	2.61e-07	2.42779	count	0.00841203
120	ABCA2	2449	ABCA2	OK	StudyFetal.Zhong.2018	-4.23024	0.731748	-5.781	8.13e-09	-5.65137	count	0.000263412
144	ABCB6	35	ABCB6	OK	StudyFetal.Zhong.2018	2.42354	0.193186	12.5451	2.73e-35	2.92131	count	8.97078e-31
222	ABHD16A	65	ABHD16A	OK	StudyFetal.Zhong.2018	0.672786	0.137058	4.9088	9.62e-07	0.909926	count	0.0309177
4716	ACTB	2489	ACTB	OK	StudyFetal.Zhong.2018	0.462051	0.0825484	5.5973	2.36e-08	0.663356	count	0.000763696
4719	ACTG1	1492	ACTG1	OK	StudyFetal.Zhong.2018	0.662596	0.105006	6.3101	3.17e-10	0.950685	count	1.03028e-05
4911	ADCY10P1	48	ADCY10P1	OK	StudyFetal.Zhong.2018	-2.43295	0.466712	-5.213	1.97e-07	-2.79463	count	0.00635325
4953	ADGRB3	2200	ADGRB3	OK	StudyFetal.Zhong.2018	-1.87956	0.357804	-5.2531	1.59e-07	-2.62372	count	0.00512966
4968	ADGRG1	145	ADGRG1	OK	StudyFetal.Zhong.2018	4.1463	0.699313	5.9291	3.36e-09	5.15981	count	0.000108975
5031	ADRM1	335	ADRM1	OK	StudyFetal.Zhong.2018	1.75984	0.363277	4.8443	1.33e-06	2.38811	count	0.0427103
5130	AGAP1	2404	AGAP1	OK	StudyFetal.Zhong.2018	-2.0346	0.286478	-7.1021	1.5e-12	-2.87009	count	4.8924e-08
5340	AKAP6	2137	AKAP6	OK	StudyFetal.Zhong.2018	-2.01806	0.408911	-4.9352	8.41e-07	-2.80003	count	0.0270356
5373	AKR1B1	273	AKR1B1	OK	StudyFetal.Zhong.2018	1.2841	0.266001	4.8274	1.45e-06	1.79574	count	0.0465537
6948	ALCAM	2342	ALCAM	OK	StudyFetal.Zhong.2018	-1.33255	0.212844	-6.2607	4.33e-10	-1.89448	count	1.40695e-05
7053	ALKBH2	138	ALKBH2	OK	StudyFetal.Zhong.2018	2.94925	0.589162	5.0058	5.86e-07	3.71277	count	0.0188528
7077	ALOX12-AS1	50	ALOX12-AS1	OK	StudyFetal.Zhong.2018	-2.52826	0.467556	-5.4074	6.86e-08	-2.92401	count	0.00221592
7101	AMER2	2074	AMER2	OK	StudyFetal.Zhong.2018	-1.91795	0.267657	-7.1657	9.53e-13	-2.72183	count	3.10897e-08
7152	AMZ2P1	60	AMZ2P1	OK	StudyFetal.Zhong.2018	0.734636	0.140084	5.2443	1.67e-07	1.00162	count	0.00538742
7161	ANAPC11	615	ANAPC11	OK	StudyFetal.Zhong.2018	2.1653	0.240489	9.0037	3.63e-19	3.04005	count	1.18955e-14
7200	ANK2	2682	ANK2	OK	StudyFetal.Zhong.2018	-1.50537	0.198835	-7.571	4.79e-14	-2.13998	count	1.56475e-09
7203	ANK3	2347	ANK3	OK	StudyFetal.Zhong.2018	-0.927306	0.168352	-5.5081	3.91e-08	-1.32434	count	0.00126426
50889	ANKRD20A9P	27	ANKRD20A9P	OK	StudyFetal.Zhong.2018	3.04769	0.438882	6.9442	4.57e-12	2.33739	count	1.48945e-07
7308	ANKRD36B	620	ANKRD36B	OK	StudyFetal.Zhong.2018	1.6614	0.312222	5.3212	1.1e-07	2.29275	count	0.00355036
7365	ANKS1B	2092	ANKS1B	OK	StudyFetal.Zhong.2018	-1.12109	0.183132	-6.1217	1.04e-09	-1.60099	count	3.37636e-05
7845	AP2M1	162	AP2M1	OK	StudyFetal.Zhong.2018	1.24763	0.204004	6.1157	1.08e-09	1.76707	count	3.5059e-05
7848	AP2S1	464	AP2S1	OK	StudyFetal.Zhong.2018	1.44629	0.270711	5.3425	9.79e-08	2.01893	count	0.00316051
7908	APBB2	1969	APBB2	OK	StudyFetal.Zhong.2018	-1.5463	0.287654	-5.3756	8.17e-08	-2.1847	count	0.00263809
7926	APEX1	284	APEX1	OK	StudyFetal.Zhong.2018	1.57125	0.27458	5.7224	1.15e-08	2.19205	count	0.00037245
7950	APLP1	2898	APLP1	OK	StudyFetal.Zhong.2018	-1.63365	0.139686	-11.6952	5.56e-31	-2.33851	count	1.82607e-26
7989	APOPT1	80	APOPT1	OK	StudyFetal.Zhong.2018	2.20039	0.401136	5.4854	4.44e-08	2.95559	count	0.00143536
7992	APP	2306	APP	OK	StudyFetal.Zhong.2018	-3.12887	0.443688	-7.0519	2.14e-12	-4.35195	count	6.97833e-08
8052	ARF5	163	ARF5	OK	StudyFetal.Zhong.2018	1.48315	0.299371	4.9542	7.63e-07	2.05404	count	0.0245343
8112	ARHGAP21	2252	ARHGAP21	OK	StudyFetal.Zhong.2018	-1.49926	0.217103	-6.9058	5.98e-12	-2.13445	count	1.94852e-07
8118	ARHGAP23	949	ARHGAP23	OK	StudyFetal.Zhong.2018	-3.19375	0.628291	-5.0832	3.92e-07	-4.41483	count	0.0126212
8160	ARHGAP5-AS1	15	ARHGAP5-AS1	OK	StudyFetal.Zhong.2018	2.24918	0.303159	7.4192	1.5e-13	2.5204	count	4.89825e-09
8268	ARL16	96	ARL16	OK	StudyFetal.Zhong.2018	2.89354	0.595402	4.8598	1.23e-06	3.57339	count	0.0395076
8280	ARL2BP	339	ARL2BP	OK	StudyFetal.Zhong.2018	1.83467	0.328118	5.5915	2.44e-08	2.52491	count	0.000789535
8289	ARL4A	129	ARL4A	OK	StudyFetal.Zhong.2018	4.20037	0.593895	7.0726	1.85e-12	5.34429	count	6.03285e-08
8397	ARPC2	400	ARPC2	OK	StudyFetal.Zhong.2018	1.29033	0.220449	5.8532	5.3e-09	1.82127	count	0.000171821
8424	ARPP21	222	ARPP21	OK	StudyFetal.Zhong.2018	3.07509	0.526957	5.8356	5.89e-09	3.94041	count	0.000190913
8496	ASB16-AS1	19	ASB16-AS1	OK	StudyFetal.Zhong.2018	2.24918	0.245291	9.1694	8.2e-20	2.5204	count	2.68763e-15
8529	ASF1B	14	ASF1B	OK	StudyFetal.Zhong.2018	2.22101	0.285781	7.7717	1.03e-14	2.36013	count	3.36656e-10
8583	ASPM	17	ASPM	OK	StudyFetal.Zhong.2018	3.45316	0.406994	8.4845	3.24e-17	2.84435	count	1.06061e-12
8784	ATP1B1	2255	ATP1B1	OK	StudyFetal.Zhong.2018	-1.90186	0.262552	-7.2437	5.42e-13	-2.69385	count	1.7686e-08
8790	ATP1B2	151	ATP1B2	OK	StudyFetal.Zhong.2018	3.23693	0.648444	4.9918	6.29e-07	3.97701	count	0.0202318
8793	ATP1B3	339	ATP1B3	OK	StudyFetal.Zhong.2018	2.06686	0.305264	6.7707	1.51e-11	2.85155	count	4.91762e-07
8904	ATP6V0D1	458	ATP6V0D1	OK	StudyFetal.Zhong.2018	1.42608	0.266778	5.3456	9.63e-08	1.99021	count	0.00310895
8913	ATP6V0E2	560	ATP6V0E2	OK	StudyFetal.Zhong.2018	1.53134	0.227556	6.7295	2e-11	2.15634	count	6.5122e-07
8937	ATP6V1F	636	ATP6V1F	OK	StudyFetal.Zhong.2018	1.15057	0.232947	4.9392	8.24e-07	1.62196	count	0.0264908
8943	ATP6V1G1	512	ATP6V1G1	OK	StudyFetal.Zhong.2018	1.62825	0.206559	7.8827	4.33e-15	2.30052	count	1.41561e-10
8958	ATP8A1	2426	ATP8A1	OK	StudyFetal.Zhong.2018	-3.43999	0.533236	-6.4512	1.27e-10	-4.72358	count	4.13004e-06
9006	ATXN1	1976	ATXN1	OK	StudyFetal.Zhong.2018	-2.39905	0.425685	-5.6357	1.89e-08	-3.34404	count	0.000611831
9054	AUTS2	1967	AUTS2	OK	StudyFetal.Zhong.2018	-1.90578	0.359365	-5.3032	1.21e-07	-2.67535	count	0.00390503
9108	B3GAT1	1060	B3GAT1	OK	StudyFetal.Zhong.2018	-2.10213	0.434007	-4.8435	1.33e-06	-2.94155	count	0.0427103
9183	BAD	320	BAD	OK	StudyFetal.Zhong.2018	2.20794	0.38371	5.7542	9.51e-09	2.97535	count	0.000308048
9228	BANF1	571	BANF1	OK	StudyFetal.Zhong.2018	1.21956	0.211486	5.7666	8.84e-09	1.72441	count	0.000286389
9297	BCAN	228	BCAN	OK	StudyFetal.Zhong.2018	3.92761	0.446462	8.7972	2.23e-18	5.31579	count	7.3037e-14
9303	BCAP31	387	BCAP31	OK	StudyFetal.Zhong.2018	1.32791	0.27554	4.8193	1.51e-06	1.85549	count	0.0484755
9336	BCHE	159	BCHE	OK	StudyFetal.Zhong.2018	2.60238	0.294233	8.8446	1.47e-18	3.59966	count	4.81513e-14
9459	BEX1	446	BEX1	OK	StudyFetal.Zhong.2018	1.48955	0.185238	8.0413	1.23e-15	2.11637	count	4.02284e-11
9462	BEX2	476	BEX2	OK	StudyFetal.Zhong.2018	1.38302	0.205887	6.7174	2.17e-11	1.95627	count	7.0653e-07
9501	BIN1	2138	BIN1	OK	StudyFetal.Zhong.2018	-1.84168	0.250433	-7.354	2.42e-13	-2.61812	count	7.9013e-09
51597	BMS1P4	6	BMS1P4	OK	StudyFetal.Zhong.2018	2.35454	0.463477	5.0802	3.98e-07	1.54889	count	0.0128136
66846	BOLA3-AS1	22	BOLA3-AS1	OK	StudyFetal.Zhong.2018	3.27084	0.399632	8.1846	3.87e-16	3.25027	count	1.26619e-11
9789	BSG	690	BSG	OK	StudyFetal.Zhong.2018	1.92376	0.216884	8.87	1.18e-18	2.70805	count	3.86544e-14
9834	BTF3	878	BTF3	OK	StudyFetal.Zhong.2018	1.41008	0.166533	8.4673	3.74e-17	2.00661	count	1.22421e-12
10191	C1orf21	143	C1orf21	OK	StudyFetal.Zhong.2018	3.60731	0.717368	5.0285	5.21e-07	4.39487	count	0.0167658
10209	C1orf61	571	C1orf61	OK	StudyFetal.Zhong.2018	2.04296	0.170784	11.9623	2.63e-32	2.90898	count	8.63876e-28
10284	C2orf27A	23	C2orf27A	OK	StudyFetal.Zhong.2018	1.79493	0.255311	7.0304	2.5e-12	2.07331	count	8.151e-08
10293	C2orf68	152	C2orf68	OK	StudyFetal.Zhong.2018	1.8045	0.309222	5.8356	5.88e-09	2.488	count	0.000190594
10344	C4orf3	343	C4orf3	OK	StudyFetal.Zhong.2018	2.44416	0.322141	7.5872	4.24e-14	3.37363	count	1.38517e-09
10359	C4orf48	1744	C4orf48	OK	StudyFetal.Zhong.2018	1.56678	0.148514	10.5497	1.31e-25	2.22958	count	4.29837e-21
10491	C9orf16	243	C9orf16	OK	StudyFetal.Zhong.2018	3.143	0.520827	6.0346	1.77e-09	4.07851	count	5.74347e-05
51834	CA10	184	CA10	OK	StudyFetal.Zhong.2018	3.41926	0.625269	5.4685	4.88e-08	4.47121	count	0.00157746
10671	CALM3	622	CALM3	OK	StudyFetal.Zhong.2018	1.33761	0.218236	6.1292	9.89e-10	1.8862	count	3.21099e-05
10701	CAMK2N1	1554	CAMK2N1	OK	StudyFetal.Zhong.2018	-2.51578	0.391341	-6.4286	1.48e-10	-3.54228	count	4.81222e-06
10824	CARNS1	1566	CARNS1	OK	StudyFetal.Zhong.2018	-2.80738	0.466304	-6.0205	1.93e-09	-3.92905	count	6.26188e-05
10959	CBX3	423	CBX3	OK	StudyFetal.Zhong.2018	1.36377	0.219546	6.2118	5.9e-10	1.92651	count	1.91644e-05
10968	CBX5	471	CBX5	OK	StudyFetal.Zhong.2018	1.11739	0.200156	5.5826	2.56e-08	1.58573	count	0.000828314
11043	CCDC124	345	CCDC124	OK	StudyFetal.Zhong.2018	2.06686	0.376192	5.4942	4.23e-08	2.80529	count	0.00136756
11085	CCDC144B	57	CCDC144B	OK	StudyFetal.Zhong.2018	0.968251	0.137505	7.0416	2.31e-12	1.30559	count	7.53222e-08
11124	CCDC167	243	CCDC167	OK	StudyFetal.Zhong.2018	3.15532	0.473341	6.6661	3.07e-11	4.13144	count	9.99285e-07
11313	CCND1	68	CCND1	OK	StudyFetal.Zhong.2018	3.8806	0.630311	6.1566	8.34e-10	4.7819	count	2.70833e-05
11385	CCT2	337	CCT2	OK	StudyFetal.Zhong.2018	1.72202	0.255439	6.7414	1.85e-11	2.41378	count	6.02434e-07
11388	CCT3	591	CCT3	OK	StudyFetal.Zhong.2018	1.28935	0.212999	6.0533	1.58e-09	1.821	count	5.12757e-05
11409	CCT8	307	CCT8	OK	StudyFetal.Zhong.2018	1.55604	0.279749	5.5623	2.88e-08	2.15904	count	0.000931738
11454	CD320	58	CD320	OK	StudyFetal.Zhong.2018	2.3228	0.431049	5.3887	7.6e-08	3.06726	count	0.0024545
11469	CD59	162	CD59	OK	StudyFetal.Zhong.2018	2.0116	0.356218	5.6471	1.77e-08	2.75349	count	0.00057302
11472	CD63	1081	CD63	OK	StudyFetal.Zhong.2018	1.13976	0.177128	6.4347	1.42e-10	1.61974	count	4.61727e-06
11502	CDC123	270	CDC123	OK	StudyFetal.Zhong.2018	1.61594	0.294999	5.4778	4.63e-08	2.23486	count	0.00149674
11613	CDH20	2199	CDH20	OK	StudyFetal.Zhong.2018	-2.93624	0.564591	-5.2007	2.11e-07	-4.00246	count	0.00680348
11682	CDK4	192	CDK4	OK	StudyFetal.Zhong.2018	1.80116	0.320856	5.6136	2.15e-08	2.48599	count	0.000695848
11808	CELF2	261	CELF2	OK	StudyFetal.Zhong.2018	2.70737	0.488454	5.5427	3.21e-08	3.55208	count	0.00103831
11814	CELF6	12	CELF6	OK	StudyFetal.Zhong.2018	2.76001	0.388491	7.1044	1.48e-12	3.07836	count	4.82746e-08
11838	CENPBD1P1	35	CENPBD1P1	OK	StudyFetal.Zhong.2018	2.85098	0.191557	14.8832	1.6e-48	3.51389	count	5.26032e-44
11928	CEP295	233	CEP295	OK	StudyFetal.Zhong.2018	2.28555	0.466514	4.8992	1.01e-06	2.99825	count	0.0324543
11988	CERCAM	1740	CERCAM	OK	StudyFetal.Zhong.2018	-3.52692	0.519067	-6.7947	1.28e-11	-4.92363	count	4.16922e-07
12030	CFAP20	284	CFAP20	OK	StudyFetal.Zhong.2018	1.86773	0.284523	6.5644	6.05e-11	2.5987	count	1.96843e-06
12096	CFDP1	434	CFDP1	OK	StudyFetal.Zhong.2018	1.71546	0.279223	6.1437	9.04e-10	2.3919	count	2.93556e-05
12102	CFL1P1	13	CFL1P1	OK	StudyFetal.Zhong.2018	1.52787	0.285395	5.3535	9.22e-08	1.77215	count	0.00297668
12204	CHID1	258	CHID1	OK	StudyFetal.Zhong.2018	2.01422	0.37034	5.4388	5.76e-08	2.73081	count	0.0018614
52413	CHML	17	CHML	OK	StudyFetal.Zhong.2018	1.94908	0.360455	5.4073	6.86e-08	1.8478	count	0.00221592
12234	CHMP2B	517	CHMP2B	OK	StudyFetal.Zhong.2018	1.32493	0.262775	5.0421	4.86e-07	1.85375	count	0.0156419
12342	CIAO1	114	CIAO1	OK	StudyFetal.Zhong.2018	2.69102	0.518978	5.1852	2.29e-07	3.44019	count	0.0073825
12354	CIAPIN1	132	CIAPIN1	OK	StudyFetal.Zhong.2018	2.22938	0.434467	5.1313	3.05e-07	2.95053	count	0.00982588
12384	CISD1	400	CISD1	OK	StudyFetal.Zhong.2018	1.81263	0.27265	6.6482	3.47e-11	2.52208	count	1.12938e-06
12429	CLASP2	2551	CLASP2	OK	StudyFetal.Zhong.2018	-1.27701	0.172934	-7.3844	1.94e-13	-1.82034	count	6.33468e-09
12465	CLDN11	2596	CLDN11	OK	StudyFetal.Zhong.2018	-3.64687	0.472481	-7.7185	1.55e-14	-5.06532	count	5.06587e-10
12477	CLDND1	1325	CLDND1	OK	StudyFetal.Zhong.2018	-1.81856	0.196233	-9.2674	3.37e-20	-2.60491	count	1.10482e-15
12567	CLPP	222	CLPP	OK	StudyFetal.Zhong.2018	2.35454	0.40543	5.8075	6.95e-09	3.12695	count	0.000225236
52566	CLUHP3	9	CLUHP3	OK	StudyFetal.Zhong.2018	2.57769	0.315256	8.1765	4.14e-16	2.34756	count	1.35444e-11
12651	CMTM6	114	CMTM6	OK	StudyFetal.Zhong.2018	2.56218	0.498133	5.1436	2.85e-07	3.3471	count	0.0091827
12705	CNN3	349	CNN3	OK	StudyFetal.Zhong.2018	1.67579	0.255586	6.5566	6.37e-11	2.35271	count	2.07242e-06
12750	CNP	2817	CNP	OK	StudyFetal.Zhong.2018	-1.19097	0.108585	-10.9681	1.64e-27	-1.70796	count	5.38297e-23
12756	CNPY2	379	CNPY2	OK	StudyFetal.Zhong.2018	1.8498	0.213605	8.6599	7.3e-18	2.61171	count	2.39039e-13
12765	CNRIP1	113	CNRIP1	OK	StudyFetal.Zhong.2018	1.94908	0.38505	5.0619	4.38e-07	2.64469	count	0.0140988
12777	CNTN1	372	CNTN1	OK	StudyFetal.Zhong.2018	2.63678	0.372728	7.0743	1.83e-12	3.59304	count	5.96781e-08
12780	CNTN2	2223	CNTN2	OK	StudyFetal.Zhong.2018	-2.64154	0.352758	-7.4882	8.93e-14	-3.72989	count	2.91654e-09
12819	COA3	119	COA3	OK	StudyFetal.Zhong.2018	1.70686	0.284844	5.9923	2.3e-09	2.35954	count	7.46097e-05
12900	COL22A1	156	COL22A1	OK	StudyFetal.Zhong.2018	-3.76795	0.420331	-8.9642	5.15e-19	-4.65343	count	1.68735e-14
12939	COL9A1	141	COL9A1	OK	StudyFetal.Zhong.2018	3.0935	0.420846	7.3507	2.48e-13	4.16072	count	8.0967e-09
12981	COMMD6	413	COMMD6	OK	StudyFetal.Zhong.2018	1.81756	0.239028	7.604	3.73e-14	2.55705	count	1.21878e-09
13008	COPE	721	COPE	OK	StudyFetal.Zhong.2018	1.36356	0.185428	7.3536	2.43e-13	1.93567	count	7.93371e-09
13104	COTL1	133	COTL1	OK	StudyFetal.Zhong.2018	3.96398	0.688779	5.7551	9.46e-09	4.90034	count	0.000306438
13143	COX4I1	1090	COX4I1	OK	StudyFetal.Zhong.2018	0.789049	0.154812	5.0968	3.65e-07	1.12634	count	0.0117545
13146	COX5A	534	COX5A	OK	StudyFetal.Zhong.2018	1.44725	0.241484	5.9931	2.28e-09	2.03693	count	7.39632e-05
13155	COX6A1	161	COX6A1	OK	StudyFetal.Zhong.2018	1.34728	0.214568	6.279	3.86e-10	1.90782	count	1.25438e-05
13161	COX6B1	1060	COX6B1	OK	StudyFetal.Zhong.2018	1.35868	0.180062	7.5456	5.8e-14	1.92913	count	1.89457e-09
13164	COX6C	1013	COX6C	OK	StudyFetal.Zhong.2018	1.00837	0.176712	5.7063	1.26e-08	1.43393	count	0.000408001
13170	COX7A2	952	COX7A2	OK	StudyFetal.Zhong.2018	1.10413	0.155783	7.0876	1.67e-12	1.57525	count	5.44654e-08
13197	CPB2-AS1	70	CPB2-AS1	OK	StudyFetal.Zhong.2018	-1.75085	0.264481	-6.6199	4.19e-11	-2.26532	count	1.36359e-06
13383	CRIP2	161	CRIP2	OK	StudyFetal.Zhong.2018	2.92364	0.430632	6.7892	1.33e-11	3.90096	count	4.33181e-07
13422	CROCCP2	104	CROCCP2	OK	StudyFetal.Zhong.2018	-1.89395	0.281415	-6.7301	2e-11	-2.46374	count	6.5122e-07
13557	CSRP1	1794	CSRP1	OK	StudyFetal.Zhong.2018	-3.31992	0.50558	-6.5666	5.97e-11	-4.62622	count	1.94246e-06
13560	CST3	390	CST3	OK	StudyFetal.Zhong.2018	3.67185	0.427109	8.597	1.25e-17	4.96975	count	4.09275e-13
13713	CUEDC2	423	CUEDC2	OK	StudyFetal.Zhong.2018	1.54125	0.283921	5.4285	6.1e-08	2.14269	count	0.00197097
13740	CUTA	917	CUTA	OK	StudyFetal.Zhong.2018	0.935025	0.19384	4.8237	1.47e-06	1.32673	count	0.0471929
13839	CYB5RL	5	CYB5RL	OK	StudyFetal.Zhong.2018	2.35454	0.463477	5.0802	3.98e-07	1.54889	count	0.0128136
13848	CYC1	498	CYC1	OK	StudyFetal.Zhong.2018	1.31054	0.221555	5.9152	3.66e-09	1.84929	count	0.000118686
13923	CYTH2	139	CYTH2	OK	StudyFetal.Zhong.2018	2.00434	0.384999	5.2061	2.05e-07	2.68791	count	0.00661084
52926	DAB2	19	DAB2	OK	StudyFetal.Zhong.2018	2.76001	0.307327	8.9807	4.45e-19	2.57889	count	1.45809e-14
13959	DAD1	870	DAD1	OK	StudyFetal.Zhong.2018	0.962585	0.177286	5.4296	6.06e-08	1.36912	count	0.00195811
13971	DANCR	52	DANCR	OK	StudyFetal.Zhong.2018	3.45316	0.207092	16.6745	5.71e-60	4.03529	count	1.87773e-55
14013	DBI	1051	DBI	OK	StudyFetal.Zhong.2018	1.54598	0.137927	11.2087	1.23e-28	2.20937	count	4.03772e-24
14133	DCTN3	381	DCTN3	OK	StudyFetal.Zhong.2018	1.58293	0.282565	5.602	2.29e-08	2.20189	count	0.00074109
14145	DCTPP1	112	DCTPP1	OK	StudyFetal.Zhong.2018	2.20039	0.45289	4.8586	1.24e-06	2.86033	count	0.0398276
14163	DCX	90	DCX	OK	StudyFetal.Zhong.2018	4.36945	0.792926	5.5105	3.86e-08	5.11558	count	0.00124813
14172	DDAH2	135	DDAH2	OK	StudyFetal.Zhong.2018	4.11813	0.803171	5.1273	3.11e-07	4.75975	count	0.0100186
14229	DDX17	1969	DDX17	OK	StudyFetal.Zhong.2018	-0.947201	0.175514	-5.3967	7.27e-08	-1.35341	count	0.00234799
14262	DDX39A	214	DDX39A	OK	StudyFetal.Zhong.2018	2.38052	0.413156	5.7618	9.1e-09	3.18935	count	0.000294794
14496	DHCR7	130	DHCR7	OK	StudyFetal.Zhong.2018	1.63155	0.33267	4.9044	9.83e-07	2.22768	count	0.0315877
14610	DIP2B	2017	DIP2B	OK	StudyFetal.Zhong.2018	-2.43295	0.438565	-5.5475	3.13e-08	-3.37666	count	0.00101249
14613	DIP2C	1952	DIP2C	OK	StudyFetal.Zhong.2018	-1.69143	0.34658	-4.8803	1.11e-06	-2.36927	count	0.0356632
14682	DLG1	2125	DLG1	OK	StudyFetal.Zhong.2018	-1.75085	0.343342	-5.0994	3.6e-07	-2.45405	count	0.0115942
14685	DLG2	3003	DLG2	OK	StudyFetal.Zhong.2018	-2.83004	0.274838	-10.2971	1.72e-24	-3.96157	count	5.6428e-20
14922	DNAJC6	2101	DNAJC6	OK	StudyFetal.Zhong.2018	-2.54116	0.437542	-5.8078	6.94e-09	-3.5314	count	0.000224918
14937	DNAL4	27	DNAL4	OK	StudyFetal.Zhong.2018	2.673	0.224538	11.9044	5.12e-32	2.96052	count	1.68172e-27
14970	DNM3	2649	DNM3	OK	StudyFetal.Zhong.2018	-2.10312	0.268312	-7.8383	6.13e-15	-2.96828	count	2.00384e-10
14988	DNPH1	151	DNPH1	OK	StudyFetal.Zhong.2018	2.30325	0.403453	5.7088	1.24e-08	3.09106	count	0.000401549
15003	DOCK10	2661	DOCK10	OK	StudyFetal.Zhong.2018	-1.80434	0.215999	-8.3535	9.68e-17	-2.56094	count	3.16797e-12
15027	DOCK9	1790	DOCK9	OK	StudyFetal.Zhong.2018	-3.42825	0.70024	-4.8958	1.03e-06	-4.63565	count	0.033096
15138	DPYD	2454	DPYD	OK	StudyFetal.Zhong.2018	-3.63692	0.720668	-5.0466	4.74e-07	-4.80171	count	0.0152566
15219	DST	2735	DST	OK	StudyFetal.Zhong.2018	-0.628408	0.121993	-5.1512	2.74e-07	-0.89866	count	0.00882965
15378	DYNLL1	1785	DYNLL1	OK	StudyFetal.Zhong.2018	0.694713	0.108641	6.3946	1.84e-10	0.996199	count	5.98202e-06
15393	DYNLT1	372	DYNLT1	OK	StudyFetal.Zhong.2018	1.90881	0.249618	7.6469	2.69e-14	2.67191	count	8.79011e-10
15531	EDF1	1161	EDF1	OK	StudyFetal.Zhong.2018	1.08388	0.173462	6.2485	4.68e-10	1.53979	count	1.52044e-05
15534	EDIL3	2966	EDIL3	OK	StudyFetal.Zhong.2018	-2.64844	0.229129	-11.5587	2.58e-30	-3.75106	count	8.47272e-26
15552	EEF1A1	719	EEF1A1	OK	StudyFetal.Zhong.2018	3.26247	0.226923	14.377	1.73e-45	4.59719	count	5.68737e-41
15576	EEF1B2	405	EEF1B2	OK	StudyFetal.Zhong.2018	2.23676	0.291517	7.6728	2.21e-14	3.09357	count	7.22206e-10
15579	EEF1D	545	EEF1D	OK	StudyFetal.Zhong.2018	1.09541	0.221241	4.9512	7.75e-07	1.54889	count	0.0249193
15594	EEF1G	132	EEF1G	OK	StudyFetal.Zhong.2018	2.25374	0.0605546	37.2183	5.28e-253	3.18361	count	1.73686e-248
15699	EGR1	80	EGR1	OK	StudyFetal.Zhong.2018	1.98298	0.40302	4.9203	9.07e-07	2.70341	count	0.029151
15708	EHD1	211	EHD1	OK	StudyFetal.Zhong.2018	1.70792	0.324926	5.2563	1.56e-07	2.35871	count	0.00503303
15828	EIF3I	272	EIF3I	OK	StudyFetal.Zhong.2018	1.61695	0.304115	5.3169	1.13e-07	2.23829	count	0.00364708
15837	EIF3K	626	EIF3K	OK	StudyFetal.Zhong.2018	1.37372	0.215361	6.3787	2.04e-10	1.94032	count	6.63163e-06
15855	EIF4A3	206	EIF4A3	OK	StudyFetal.Zhong.2018	2.1469	0.321628	6.6751	2.89e-11	2.95007	count	9.40724e-07
15861	EIF4E	350	EIF4E	OK	StudyFetal.Zhong.2018	1.61261	0.317966	5.0716	4.16e-07	2.22363	count	0.013391
15870	EIF4EBP1	65	EIF4EBP1	OK	StudyFetal.Zhong.2018	3.30363	0.619262	5.3348	1.02e-07	4.07088	count	0.00329246
15873	EIF4EBP2	126	EIF4EBP2	OK	StudyFetal.Zhong.2018	2.38964	0.494104	4.8363	1.38e-06	3.1258	count	0.0443104
15891	EIF4H	482	EIF4H	OK	StudyFetal.Zhong.2018	1.39111	0.252387	5.5118	3.83e-08	1.95238	count	0.00123847
15915	ELAC1	23	ELAC1	OK	StudyFetal.Zhong.2018	1.20941	0.218739	5.529	3.47e-08	1.44901	count	0.0011222
15927	ELAVL3	1337	ELAVL3	OK	StudyFetal.Zhong.2018	-1.20768	0.249233	-4.8456	1.32e-06	-1.71658	count	0.0423905
15957	ELMO1	2569	ELMO1	OK	StudyFetal.Zhong.2018	-1.25457	0.191509	-6.551	6.62e-11	-1.78459	count	2.15368e-06
15990	ELOF1	87	ELOF1	OK	StudyFetal.Zhong.2018	1.84945	0.36026	5.1337	3.01e-07	2.51456	count	0.00969762
16044	EMC3-AS1	27	EMC3-AS1	OK	StudyFetal.Zhong.2018	3.10832	0.254101	12.2326	1.13e-33	3.55568	count	3.71228e-29
16116	ENO1	777	ENO1	OK	StudyFetal.Zhong.2018	1.17589	0.164663	7.1412	1.14e-12	1.67651	count	3.71891e-08
16140	ENPP2	2490	ENPP2	OK	StudyFetal.Zhong.2018	-1.3773	0.178634	-7.7102	1.66e-14	-1.96751	count	5.42505e-10
16161	ENTPD1-AS1	57	ENTPD1-AS1	OK	StudyFetal.Zhong.2018	-2.79295	0.530327	-5.2665	1.48e-07	-3.28681	count	0.00477552
16212	EPB41L4A-AS1	58	EPB41L4A-AS1	OK	StudyFetal.Zhong.2018	1.03887	0.143271	7.2511	5.14e-13	1.41444	count	1.67728e-08
16275	EPN2	1377	EPN2	OK	StudyFetal.Zhong.2018	0.793202	0.145883	5.4372	5.81e-08	1.13308	count	0.0018775
16323	ERCC1	231	ERCC1	OK	StudyFetal.Zhong.2018	1.61139	0.320074	5.0344	5.05e-07	2.21952	count	0.0162524
16392	ERMN	1930	ERMN	OK	StudyFetal.Zhong.2018	-2.75019	0.398779	-6.8965	6.37e-12	-3.87024	count	2.07547e-07
16428	ESCO2	11	ESCO2	OK	StudyFetal.Zhong.2018	3.74084	0.406826	9.1952	6.5e-20	3.21874	count	2.13063e-15
16434	ESF1	743	ESF1	OK	StudyFetal.Zhong.2018	1.4573	0.264716	5.5052	3.97e-08	2.0376	count	0.00128362
16494	ETV5	128	ETV5	OK	StudyFetal.Zhong.2018	2.40861	0.500128	4.816	1.53e-06	3.21687	count	0.0491145
16503	EVI2A	438	EVI2A	OK	StudyFetal.Zhong.2018	-1.47975	0.30531	-4.8467	1.31e-06	-2.09921	count	0.0420707
16626	F2R	36	F2R	OK	StudyFetal.Zhong.2018	4.36945	0.389581	11.2158	1.13e-28	4.06674	count	3.70956e-24
16638	FA2H	1630	FA2H	OK	StudyFetal.Zhong.2018	-2.85676	0.510509	-5.5959	2.38e-08	-3.96183	count	0.000770144
16662	FABP7	117	FABP7	OK	StudyFetal.Zhong.2018	5.56673	0.832366	6.6878	2.65e-11	6.82629	count	8.62681e-07
16716	FAM107B	1961	FAM107B	OK	StudyFetal.Zhong.2018	-3.10589	0.527411	-5.8889	4.28e-09	-4.28888	count	0.000138779
17034	FAM32A	175	FAM32A	OK	StudyFetal.Zhong.2018	2.20372	0.360757	6.1086	1.12e-09	2.99261	count	3.63563e-05
17070	FAM53B	122	FAM53B	OK	StudyFetal.Zhong.2018	-2.02121	0.25673	-7.8729	4.68e-15	-2.70347	count	1.52999e-10
53640	FAR2P2	40	FAR2P2	OK	StudyFetal.Zhong.2018	3.45316	0.384391	8.9835	4.34e-19	3.8287	count	1.42209e-14
17220	FASTKD5	28	FASTKD5	OK	StudyFetal.Zhong.2018	1.25593	0.181534	6.9184	5.47e-12	1.53069	count	1.78251e-07
17229	FAU	1624	FAU	OK	StudyFetal.Zhong.2018	0.929985	0.130553	7.1234	1.29e-12	1.33002	count	4.20785e-08
17487	FGF12	269	FGF12	OK	StudyFetal.Zhong.2018	2.71745	0.50293	5.4032	7.02e-08	3.62547	count	0.00226732
17517	FGFR2	1760	FGFR2	OK	StudyFetal.Zhong.2018	-1.34771	0.25969	-5.1897	2.24e-07	-1.91408	count	0.00722221
17538	FHL1	134	FHL1	OK	StudyFetal.Zhong.2018	2.60586	0.386265	6.7463	1.79e-11	3.53071	count	5.82931e-07
17550	FIBP	238	FIBP	OK	StudyFetal.Zhong.2018	1.77388	0.306819	5.7815	8.1e-09	2.45233	count	0.000262456
17571	FIP1L1	139	FIP1L1	OK	StudyFetal.Zhong.2018	1.59396	0.291785	5.4628	5.04e-08	2.20569	count	0.00162903
17592	FKBP1A	199	FKBP1A	OK	StudyFetal.Zhong.2018	1.67296	0.225154	7.4303	1.38e-13	2.36117	count	4.50653e-09
17682	FMNL2	2733	FMNL2	OK	StudyFetal.Zhong.2018	-3.07772	0.381166	-8.0745	9.44e-16	-4.27857	count	3.08773e-11
17706	FNBP1	1722	FNBP1	OK	StudyFetal.Zhong.2018	-2.20029	0.380574	-5.7815	8.1e-09	-3.09004	count	0.000262456
17757	FOS	216	FOS	OK	StudyFetal.Zhong.2018	1.36568	0.225161	6.0654	1.47e-09	1.93697	count	4.77089e-05
17769	FOXK1	409	FOXK1	OK	StudyFetal.Zhong.2018	1.71099	0.2643	6.4737	1.1e-10	2.3923	count	3.57753e-06
17877	FRMD4B	2335	FRMD4B	OK	StudyFetal.Zhong.2018	-1.96602	0.305443	-6.4366	1.4e-10	-2.76705	count	4.55238e-06
17880	FRMD5	2694	FRMD5	OK	StudyFetal.Zhong.2018	-4.78432	0.947464	-5.0496	4.67e-07	-6.10398	count	0.0150318
17910	FRYL	2535	FRYL	OK	StudyFetal.Zhong.2018	-1.62599	0.230963	-7.04	2.33e-12	-2.30708	count	7.5972e-08
17979	FTL	2771	FTL	OK	StudyFetal.Zhong.2018	0.832118	0.0778319	10.6912	3.03e-26	1.19322	count	9.94264e-22
18018	FUNDC2	234	FUNDC2	OK	StudyFetal.Zhong.2018	1.58729	0.32105	4.9441	8.04e-07	2.18778	count	0.0258486
18063	FXYD6	124	FXYD6	OK	StudyFetal.Zhong.2018	2.02241	0.0728152	27.7746	1.4e-152	2.86525	count	4.60502e-148
18111	GAB1	2211	GAB1	OK	StudyFetal.Zhong.2018	-2.12506	0.353933	-6.0041	2.14e-09	-2.97434	count	6.94237e-05
18138	GABPB1-AS1	86	GABPB1-AS1	OK	StudyFetal.Zhong.2018	0.547748	0.104088	5.2624	1.51e-07	0.755954	count	0.00487202
18180	GADD45GIP1	506	GADD45GIP1	OK	StudyFetal.Zhong.2018	1.76148	0.317685	5.5447	3.18e-08	2.42414	count	0.00102863
18261	GAP43	161	GAP43	OK	StudyFetal.Zhong.2018	4.04094	0.658043	6.1409	9.2e-10	5.00979	count	2.98742e-05
18264	GAPDH	2364	GAPDH	OK	StudyFetal.Zhong.2018	0.611576	0.0857084	7.1355	1.18e-12	0.877845	count	3.84916e-08
18315	GAS5	91	GAS5	OK	StudyFetal.Zhong.2018	1.23854	0.0991786	12.488	5.41e-35	1.71998	count	1.77767e-30
18417	GCSH	160	GCSH	OK	StudyFetal.Zhong.2018	3.72685	0.53914	6.9126	5.7e-12	4.86692	count	1.8574e-07
54075	GEMIN7	28	GEMIN7	OK	StudyFetal.Zhong.2018	2.84005	0.405233	7.0085	2.92e-12	3.1873	count	9.51891e-08
18696	GLUL	1823	GLUL	OK	StudyFetal.Zhong.2018	-1.12713	0.209477	-5.3807	7.94e-08	-1.6055	count	0.00256406
18894	GOLM1	203	GOLM1	OK	StudyFetal.Zhong.2018	2.59571	0.519547	4.9961	6.16e-07	3.34031	count	0.0198155
19023	GPM6A	357	GPM6A	OK	StudyFetal.Zhong.2018	5.08891	0.696959	7.3016	3.56e-13	6.5088	count	1.16202e-08
19026	GPM6B	2776	GPM6B	OK	StudyFetal.Zhong.2018	-0.599053	0.0825854	-7.2537	5.04e-13	-0.860855	count	1.6447e-08
19065	GPR17	108	GPR17	OK	StudyFetal.Zhong.2018	3.66673	0.586578	6.2511	4.61e-10	4.66513	count	1.49784e-05
19107	GPRC5B	1424	GPRC5B	OK	StudyFetal.Zhong.2018	-1.94177	0.258801	-7.5029	8e-14	-2.76878	count	2.61296e-09
19128	GPX1	217	GPX1	OK	StudyFetal.Zhong.2018	2.59967	0.398904	6.517	8.28e-11	3.48764	count	2.69332e-06
19188	GRIA2	818	GRIA2	OK	StudyFetal.Zhong.2018	1.71546	0.200261	8.5661	1.63e-17	2.42427	count	5.33662e-13
19200	GRID2	1214	GRID2	OK	StudyFetal.Zhong.2018	1.95766	0.360038	5.4374	5.81e-08	2.66757	count	0.0018775
19248	GRM3	2040	GRM3	OK	StudyFetal.Zhong.2018	-2.54116	0.45564	-5.5771	2.64e-08	-3.5314	count	0.000854172
19302	GSN	1767	GSN	OK	StudyFetal.Zhong.2018	-1.73503	0.33859	-5.1243	3.16e-07	-2.44139	count	0.0101784
19323	GSTK1	264	GSTK1	OK	StudyFetal.Zhong.2018	1.56831	0.32438	4.8348	1.39e-06	2.16736	count	0.0446301
19341	GSTP1	1179	GSTP1	OK	StudyFetal.Zhong.2018	0.851663	0.167054	5.0981	3.63e-07	1.21327	count	0.0116904
19428	GTF3C6	338	GTF3C6	OK	StudyFetal.Zhong.2018	1.94396	0.271063	7.1716	9.13e-13	2.70925	count	2.97857e-08
19485	GUSBP4	20	GUSBP4	OK	StudyFetal.Zhong.2018	2.1314	0.329443	6.4697	1.13e-10	2.36429	count	3.67499e-06
19533	H2AFZ	474	H2AFZ	OK	StudyFetal.Zhong.2018	1.73322	0.211655	8.1889	3.74e-16	2.4518	count	1.22373e-11
19602	HAS2-AS1	16	HAS2-AS1	OK	StudyFetal.Zhong.2018	1.77918	0.291997	6.0931	1.24e-09	2.10335	count	4.02492e-05
19611	HAUS1	108	HAUS1	OK	StudyFetal.Zhong.2018	2.39229	0.475728	5.0287	5.21e-07	3.10809	count	0.0167658
19629	HAUS7	28	HAUS7	OK	StudyFetal.Zhong.2018	1.77918	0.181106	9.824	1.81e-22	2.10335	count	5.93644e-18
54453	HBA2	137	HBA2	OK	StudyFetal.Zhong.2018	3.42718	0.471012	7.2762	4.28e-13	4.57577	count	1.39691e-08
19641	HBE1	16	HBE1	OK	StudyFetal.Zhong.2018	2.35454	0.463477	5.0802	3.98e-07	1.54889	count	0.0128136
19833	HERC2P2	98	HERC2P2	OK	StudyFetal.Zhong.2018	0.968251	0.0944905	10.2471	2.84e-24	1.34545	count	9.31662e-20
19932	HIGD1A	121	HIGD1A	OK	StudyFetal.Zhong.2018	1.21438	0.222811	5.4503	5.4e-08	1.70674	count	0.00174517
20013	HIST1H4C	235	HIST1H4C	OK	StudyFetal.Zhong.2018	1.69674	0.177567	9.5555	2.34e-21	2.41494	count	7.67286e-17
54546	HIST2H2AC	9	HIST2H2AC	OK	StudyFetal.Zhong.2018	2.76001	0.436503	6.323	2.91e-10	1.99635	count	9.45837e-06
20103	HMGA1	121	HMGA1	OK	StudyFetal.Zhong.2018	2.92991	0.58561	5.0032	5.94e-07	3.73543	count	0.0191096
20109	HMGB1	1718	HMGB1	OK	StudyFetal.Zhong.2018	1.09535	0.12333	8.8815	1.07e-18	1.5665	count	3.50521e-14
20142	HMGN1	330	HMGN1	OK	StudyFetal.Zhong.2018	1.78059	0.224214	7.9415	2.73e-15	2.51056	count	8.92683e-11
20145	HMGN2	168	HMGN2	OK	StudyFetal.Zhong.2018	2.94101	0.252732	11.6369	1.07e-30	4.12045	count	3.51409e-26
20151	HMGN3	1092	HMGN3	OK	StudyFetal.Zhong.2018	1.01142	0.194281	5.206	2.05e-07	1.43303	count	0.00661084
20241	HNRNPUL2	72	HNRNPUL2	OK	StudyFetal.Zhong.2018	-1.87956	0.33425	-5.6232	2.03e-08	-2.33251	count	0.000657091
20346	HSBP1	344	HSBP1	OK	StudyFetal.Zhong.2018	1.90015	0.200896	9.4584	5.79e-21	2.68823	count	1.89843e-16
20358	HSD11B1L	38	HSD11B1L	OK	StudyFetal.Zhong.2018	3.04769	0.560938	5.4332	5.94e-08	3.47202	count	0.00191939
20364	HSD17B10	282	HSD17B10	OK	StudyFetal.Zhong.2018	1.88454	0.342657	5.4998	4.1e-08	2.5777	count	0.00132561
20385	HSD17B7P2	23	HSD17B7P2	OK	StudyFetal.Zhong.2018	1.46073	0.251935	5.798	7.35e-09	1.78022	count	0.000238177
20451	HSPA1A	2474	HSPA1A	OK	StudyFetal.Zhong.2018	-1.14708	0.145204	-7.8998	3.79e-15	-1.64361	count	1.2391e-10
20454	HSPA1B	1322	HSPA1B	OK	StudyFetal.Zhong.2018	-2.15317	0.373982	-5.7574	9.33e-09	-3.04003	count	0.000302236
20460	HSPA2	1875	HSPA2	OK	StudyFetal.Zhong.2018	-4.16313	0.852059	-4.886	1.08e-06	-5.55508	count	0.0347004
20532	HTRA1	1808	HTRA1	OK	StudyFetal.Zhong.2018	-1.59429	0.30275	-5.266	1.48e-07	-2.24765	count	0.00477552
20607	ID2	179	ID2	OK	StudyFetal.Zhong.2018	1.52585	0.237781	6.417	1.59e-10	2.14058	count	5.16957e-06
20619	IDH1	229	IDH1	OK	StudyFetal.Zhong.2018	2.08339	0.288552	7.2202	6.43e-13	2.88747	count	2.09798e-08
20622	IDH2	506	IDH2	OK	StudyFetal.Zhong.2018	1.31792	0.231945	5.6821	1.45e-08	1.85421	count	0.000469496
20652	IER2	132	IER2	OK	StudyFetal.Zhong.2018	2.31372	0.370032	6.2528	4.56e-10	3.14873	count	1.48164e-05
20655	IER3IP1	59	IER3IP1	OK	StudyFetal.Zhong.2018	2.35454	0.286109	8.2295	2.69e-16	3.16366	count	8.80222e-12
20679	IFI27L2	528	IFI27L2	OK	StudyFetal.Zhong.2018	1.98518	0.316362	6.275	3.96e-10	2.72829	count	1.28684e-05
20811	IK	292	IK	OK	StudyFetal.Zhong.2018	1.64119	0.291608	5.6281	1.98e-08	2.27996	count	0.000640926
20886	ILF2	300	ILF2	OK	StudyFetal.Zhong.2018	2.30802	0.269859	8.5527	1.82e-17	3.21857	count	5.9585e-13
21090	IP6K2	410	IP6K2	OK	StudyFetal.Zhong.2018	1.07511	0.211255	5.0892	3.8e-07	1.52339	count	0.0122352
21111	IPO5P1	21	IPO5P1	OK	StudyFetal.Zhong.2018	1.43825	0.292265	4.9211	9.03e-07	1.48293	count	0.0290233
21210	ISCA2	144	ISCA2	OK	StudyFetal.Zhong.2018	2.19203	0.410888	5.3349	1.02e-07	2.93388	count	0.00329246
21234	ISY1	53	ISY1	OK	StudyFetal.Zhong.2018	1.52164	0.132979	11.4426	9.39e-30	2.01972	count	3.08339e-25
21309	ITM2A	145	ITM2A	OK	StudyFetal.Zhong.2018	2.92991	0.550012	5.327	1.07e-07	3.73543	count	0.00345364
21315	ITM2C	385	ITM2C	OK	StudyFetal.Zhong.2018	1.43825	0.256772	5.6013	2.3e-08	2.01884	count	0.000744303
21423	JMJD7	15	JMJD7	OK	StudyFetal.Zhong.2018	2.64223	0.322737	8.1869	3.8e-16	2.72916	count	1.24332e-11
21675	KCNQ1OT1	826	KCNQ1OT1	OK	StudyFetal.Zhong.2018	1.94396	0.261325	7.4389	1.29e-13	2.70925	count	4.21288e-09
22260	KPNA2	125	KPNA2	OK	StudyFetal.Zhong.2018	3.08278	0.596009	5.1724	2.45e-07	3.83885	count	0.00789733
22386	LAGE3	311	LAGE3	OK	StudyFetal.Zhong.2018	1.83833	0.356359	5.1586	2.64e-07	2.50807	count	0.00850819
22404	LAMP2	1180	LAMP2	OK	StudyFetal.Zhong.2018	-2.541	0.379072	-6.7032	2.39e-11	-3.59151	count	7.78112e-07
22410	LAMTOR2	245	LAMTOR2	OK	StudyFetal.Zhong.2018	2.86537	0.550043	5.2094	2.01e-07	3.64453	count	0.00648205
22413	LAMTOR3	154	LAMTOR3	OK	StudyFetal.Zhong.2018	1.87112	0.385371	4.8554	1.26e-06	2.54996	count	0.0404687
22419	LAMTOR5	647	LAMTOR5	OK	StudyFetal.Zhong.2018	1.6614	0.24003	6.9216	5.35e-12	2.33394	count	1.74346e-07
22425	LANCL1	1811	LANCL1	OK	StudyFetal.Zhong.2018	-2.41952	0.388087	-6.2345	5.11e-10	-3.39589	count	1.65998e-05
22491	LBH	15	LBH	OK	StudyFetal.Zhong.2018	1.94908	0.360455	5.4073	6.86e-08	1.8478	count	0.00221592
22542	LDHA	249	LDHA	OK	StudyFetal.Zhong.2018	2.64789	0.377266	7.0186	2.71e-12	3.60009	count	8.83514e-08
22545	LDHB	656	LDHB	OK	StudyFetal.Zhong.2018	1.60504	0.168136	9.5461	2.55e-21	2.2849	count	8.36119e-17
22599	LEPROTL1	152	LEPROTL1	OK	StudyFetal.Zhong.2018	1.48704	0.303174	4.9049	9.8e-07	2.06119	count	0.0314923
22677	LIMA1	388	LIMA1	OK	StudyFetal.Zhong.2018	1.7812	0.258115	6.9008	6.19e-12	2.48701	count	2.01689e-07
22680	LIMCH1	2409	LIMCH1	OK	StudyFetal.Zhong.2018	-1.90591	0.269134	-7.0816	1.74e-12	-2.70223	count	5.67449e-08
22809	LINC00504	92	LINC00504	OK	StudyFetal.Zhong.2018	3.04769	0.607986	5.0128	5.65e-07	3.85137	count	0.0181777
22875	LINC00674	68	LINC00674	OK	StudyFetal.Zhong.2018	1.86904	0.114916	16.2643	2.99e-57	2.52583	count	9.83202e-53
22929	LINC00888	43	LINC00888	OK	StudyFetal.Zhong.2018	1.51479	0.140923	10.7491	1.65e-26	2.00301	count	5.4148e-22
55776	LINC00997	13	LINC00997	OK	StudyFetal.Zhong.2018	3.04769	0.438882	6.9442	4.57e-12	2.33739	count	1.48945e-07
23157	LINC01578	217	LINC01578	OK	StudyFetal.Zhong.2018	-1.60944	0.134005	-12.0103	1.51e-32	-2.25239	count	4.9602e-28
23448	LINC-PINT	116	LINC-PINT	OK	StudyFetal.Zhong.2018	-3.4861	0.46505	-7.4962	8.42e-14	-4.25478	count	2.75006e-09
23463	LIPA	1578	LIPA	OK	StudyFetal.Zhong.2018	-1.80173	0.371981	-4.8436	1.33e-06	-2.52669	count	0.0427103
23526	LMF1	437	LMF1	OK	StudyFetal.Zhong.2018	1.3112	0.235985	5.5563	2.98e-08	1.84566	count	0.00096406
23673	LRP1	174	LRP1	OK	StudyFetal.Zhong.2018	2.64223	0.480655	5.4971	4.16e-08	3.50149	count	0.00134497
56952	LRRC37A4P	29	LRRC37A4P	OK	StudyFetal.Zhong.2018	2.76001	0.315532	8.7472	3.44e-18	2.57889	count	1.12657e-13
23757	LRRC37BP1	53	LRRC37BP1	OK	StudyFetal.Zhong.2018	2.08628	0.14208	14.6838	2.57e-47	2.74948	count	8.44913e-43
56997	LSAMP-AS1	10	LSAMP-AS1	OK	StudyFetal.Zhong.2018	2.35454	0.463477	5.0802	3.98e-07	1.54889	count	0.0128136
23895	LSM3	430	LSM3	OK	StudyFetal.Zhong.2018	1.77262	0.277845	6.3799	2.02e-10	2.46859	count	6.56682e-06
23901	LSM4	323	LSM4	OK	StudyFetal.Zhong.2018	1.62436	0.290814	5.5856	2.52e-08	2.26366	count	0.000815396
23904	LSM5	271	LSM5	OK	StudyFetal.Zhong.2018	2.00434	0.412055	4.8643	1.2e-06	2.68791	count	0.0385476
23910	LSM7	391	LSM7	OK	StudyFetal.Zhong.2018	2.35454	0.335762	7.0125	2.83e-12	3.21351	count	9.2258e-08
23970	LUZP2	226	LUZP2	OK	StudyFetal.Zhong.2018	2.81002	0.506359	5.5495	3.09e-08	3.69738	count	0.000999584
24084	MAD2L2	239	MAD2L2	OK	StudyFetal.Zhong.2018	2.29267	0.364706	6.2863	3.68e-10	3.11883	count	1.19596e-05
24114	MAG	2233	MAG	OK	StudyFetal.Zhong.2018	-1.78222	0.217866	-8.1804	4.01e-16	-2.54163	count	1.31195e-11
24120	MAGED1	396	MAGED1	OK	StudyFetal.Zhong.2018	2.2352	0.281336	7.9449	2.65e-15	3.10401	count	8.6655e-11
24123	MAGED2	278	MAGED2	OK	StudyFetal.Zhong.2018	2.59422	0.340479	7.6193	3.32e-14	3.54048	count	1.08484e-09
24144	MAGI2	2999	MAGI2	OK	StudyFetal.Zhong.2018	-2.4857	0.23303	-10.6668	3.9e-26	-3.50613	count	1.27971e-21
24147	MAGI2-AS3	163	MAGI2-AS3	OK	StudyFetal.Zhong.2018	-1.61102	0.154885	-10.4014	5.98e-25	-2.22168	count	1.96198e-20
24168	MAL	1929	MAL	OK	StudyFetal.Zhong.2018	-2.51555	0.37623	-6.6862	2.68e-11	-3.54898	count	8.7242e-07
24171	MALAT1	459	MALAT1	OK	StudyFetal.Zhong.2018	0.300557	0.0210999	14.2445	1.04e-44	0.432611	count	3.4189e-40
24222	MAN2A1	2726	MAN2A1	OK	StudyFetal.Zhong.2018	-3.39357	0.43919	-7.7269	1.46e-14	-4.70151	count	4.77186e-10
24276	MAP2	334	MAP2	OK	StudyFetal.Zhong.2018	3.25966	0.404674	8.055	1.1e-15	4.42858	count	3.59777e-11
24312	MAP3K13	460	MAP3K13	OK	StudyFetal.Zhong.2018	1.56231	0.288231	5.4203	6.38e-08	2.1726	count	0.00206112
24357	MAP4K4	2409	MAP4K4	OK	StudyFetal.Zhong.2018	-1.50206	0.222878	-6.7394	1.87e-11	-2.13115	count	6.08909e-07
24369	MAP7	2677	MAP7	OK	StudyFetal.Zhong.2018	-2.51606	0.33133	-7.5938	4.03e-14	-3.53429	count	1.31664e-09
24432	MAPKAPK5-AS1	30	MAPKAPK5-AS1	OK	StudyFetal.Zhong.2018	4.22635	0.369878	11.4263	1.12e-29	4.56547	count	3.67752e-25
24456	MARCH1	2354	MARCH1	OK	StudyFetal.Zhong.2018	-1.97091	0.358893	-5.4916	4.29e-08	-2.75409	count	0.00138691
24483	MARCKS	280	MARCKS	OK	StudyFetal.Zhong.2018	2.17222	0.257039	8.451	4.29e-17	3.04398	count	1.40412e-12
24585	MBNL2	2081	MBNL2	OK	StudyFetal.Zhong.2018	-2.41614	0.3625	-6.6652	3.09e-11	-3.39104	count	1.00576e-06
24597	MBP	3057	MBP	OK	StudyFetal.Zhong.2018	-1.26023	0.10624	-11.8621	8.32e-32	-1.80812	count	2.73262e-27
24714	MDH2	331	MDH2	OK	StudyFetal.Zhong.2018	1.35437	0.232954	5.8139	6.69e-09	1.9067	count	0.000216823
24792	MED19	151	MED19	OK	StudyFetal.Zhong.2018	2.55934	0.487562	5.2493	1.62e-07	3.28923	count	0.00522628
24852	MEF2C	173	MEF2C	OK	StudyFetal.Zhong.2018	4.05929	0.635293	6.3896	1.9e-10	5.0359	count	6.1769e-06
24861	MEG3	201	MEG3	OK	StudyFetal.Zhong.2018	3.935	0.420266	9.3631	1.4e-20	5.32638	count	4.59004e-16
24909	MEST	87	MEST	OK	StudyFetal.Zhong.2018	2.6647	0.546879	4.8726	1.15e-06	3.43733	count	0.0369437
24927	METTL1	7	METTL1	OK	StudyFetal.Zhong.2018	2.35454	0.326674	7.2076	7.04e-13	2.07193	count	2.29694e-08
24945	METTL21A	133	METTL21A	OK	StudyFetal.Zhong.2018	3.84464	0.56591	6.7937	1.29e-11	4.98286	count	4.20166e-07
57345	MLLT11	176	MLLT11	OK	StudyFetal.Zhong.2018	5.18776	0.835781	6.2071	6.08e-10	6.28287	count	1.97478e-05
25536	MOBP	2179	MOBP	OK	StudyFetal.Zhong.2018	-1.56412	0.259431	-6.029	1.83e-09	-2.22156	count	5.93762e-05
25548	MOG	1300	MOG	OK	StudyFetal.Zhong.2018	-1.89395	0.358377	-5.2848	1.34e-07	-2.66869	count	0.00432431
25617	MPC2	339	MPC2	OK	StudyFetal.Zhong.2018	1.54557	0.270525	5.7132	1.21e-08	2.16224	count	0.000391858
25743	MRPL13	151	MRPL13	OK	StudyFetal.Zhong.2018	2.25446	0.385449	5.8489	5.44e-09	3.03205	count	0.000176348
25785	MRPL27	306	MRPL27	OK	StudyFetal.Zhong.2018	2.1314	0.398961	5.3424	9.8e-08	2.84836	count	0.00316364
25818	MRPL38	64	MRPL38	OK	StudyFetal.Zhong.2018	1.51298	0.122026	12.3988	1.57e-34	2.04118	count	5.15855e-30
25830	MRPL41	689	MRPL41	OK	StudyFetal.Zhong.2018	1.46469	0.279859	5.2337	1.77e-07	2.0381	count	0.0057086
25863	MRPL51	564	MRPL51	OK	StudyFetal.Zhong.2018	1.35239	0.240697	5.6186	2.09e-08	1.89924	count	0.000676449
25869	MRPL53	61	MRPL53	OK	StudyFetal.Zhong.2018	0.756941	0.144468	5.2395	1.71e-07	1.02464	count	0.00551578
25875	MRPL55	416	MRPL55	OK	StudyFetal.Zhong.2018	2.0097	0.309203	6.4996	9.28e-11	2.77025	count	3.01841e-06
25911	MRPS18A	179	MRPS18A	OK	StudyFetal.Zhong.2018	2.76001	0.462842	5.9632	2.74e-09	3.60108	count	8.88746e-05
25923	MRPS21	402	MRPS21	OK	StudyFetal.Zhong.2018	1.5256	0.263376	5.7925	7.6e-09	2.13278	count	0.00024627
25941	MRPS28	98	MRPS28	OK	StudyFetal.Zhong.2018	1.47334	0.29696	4.9614	7.36e-07	2.00816	count	0.0236668
26121	MTCH2	339	MTCH2	OK	StudyFetal.Zhong.2018	1.54361	0.302237	5.1073	3.46e-07	2.13238	count	0.0111436
26295	MTMR9LP	33	MTMR9LP	OK	StudyFetal.Zhong.2018	2.06686	0.166743	12.3955	1.64e-34	2.57198	count	5.38838e-30
26454	MTUS1	2156	MTUS1	OK	StudyFetal.Zhong.2018	-3.41065	0.553897	-6.1575	8.29e-10	-4.6815	count	2.69218e-05
26583	MYL6	926	MYL6	OK	StudyFetal.Zhong.2018	1.04639	0.138877	7.5346	6.31e-14	1.49668	count	2.0611e-09
26586	MYL6B	162	MYL6B	OK	StudyFetal.Zhong.2018	2.76001	0.523736	5.2698	1.45e-07	3.60108	count	0.00467886
26670	MYRF	1593	MYRF	OK	StudyFetal.Zhong.2018	-3.32563	0.528987	-6.2868	3.67e-10	-4.63441	count	1.19275e-05
26763	NACA	1108	NACA	OK	StudyFetal.Zhong.2018	1.42277	0.15394	9.2424	4.23e-20	2.02879	count	1.38664e-15
26931	NCALD	165	NCALD	OK	StudyFetal.Zhong.2018	2.9964	0.498057	6.0162	1.98e-09	3.87082	count	6.42391e-05
26934	NCAM1	2559	NCAM1	OK	StudyFetal.Zhong.2018	-1.07092	0.137474	-7.79	8.94e-15	-1.53264	count	2.92222e-10
26937	NCAM2	2792	NCAM2	OK	StudyFetal.Zhong.2018	-1.83385	0.199743	-9.181	7.39e-20	-2.60847	count	2.42229e-15
26955	NCBP2	116	NCBP2	OK	StudyFetal.Zhong.2018	2.04089	0.37601	5.4278	6.12e-08	2.76853	count	0.00197737
26958	NCBP2-AS2	65	NCBP2-AS2	OK	StudyFetal.Zhong.2018	1.50106	0.118925	12.6219	1.08e-35	2.01488	count	3.54899e-31
26988	NCL	546	NCL	OK	StudyFetal.Zhong.2018	1.13255	0.222273	5.0953	3.68e-07	1.60023	count	0.0118503
27057	NDRG1	1966	NDRG1	OK	StudyFetal.Zhong.2018	-2.99415	0.490087	-6.1094	1.12e-09	-4.15872	count	3.63563e-05
27090	NDUFA11	702	NDUFA11	OK	StudyFetal.Zhong.2018	1.37117	0.188806	7.2623	4.74e-13	1.94632	count	1.54695e-08
27096	NDUFA13	131	NDUFA13	OK	StudyFetal.Zhong.2018	2.04554	0.201364	10.1584	6.87e-24	2.89	count	2.2535e-19
27102	NDUFA3	666	NDUFA3	OK	StudyFetal.Zhong.2018	1.1224	0.190762	5.8838	4.42e-09	1.59307	count	0.000143314
27105	NDUFA4	1116	NDUFA4	OK	StudyFetal.Zhong.2018	1.08158	0.135401	7.988	1.88e-15	1.54682	count	6.14835e-11
27111	NDUFA6	285	NDUFA6	OK	StudyFetal.Zhong.2018	2.09218	0.297254	7.0384	2.36e-12	2.89712	count	7.69478e-08
27114	NDUFA7	113	NDUFA7	OK	StudyFetal.Zhong.2018	1.4566	0.293353	4.9654	7.21e-07	2.02397	count	0.0231859
27117	NDUFA8	361	NDUFA8	OK	StudyFetal.Zhong.2018	1.61377	0.315736	5.1111	3.39e-07	2.22754	count	0.0109185
27123	NDUFAB1	422	NDUFAB1	OK	StudyFetal.Zhong.2018	1.17715	0.239952	4.9058	9.76e-07	1.65946	count	0.0313657
27150	NDUFB1	533	NDUFB1	OK	StudyFetal.Zhong.2018	1.21956	0.248618	4.9054	9.78e-07	1.71307	count	0.031429
27153	NDUFB10	576	NDUFB10	OK	StudyFetal.Zhong.2018	1.31221	0.232982	5.6323	1.93e-08	1.85041	count	0.00062476
27156	NDUFB11	608	NDUFB11	OK	StudyFetal.Zhong.2018	1.9371	0.232911	8.3169	1.31e-16	2.7199	count	4.28697e-12
27162	NDUFB2	897	NDUFB2	OK	StudyFetal.Zhong.2018	1.14609	0.180957	6.3335	2.73e-10	1.62781	count	8.87359e-06
27174	NDUFB6	535	NDUFB6	OK	StudyFetal.Zhong.2018	0.974367	0.190081	5.1261	3.13e-07	1.38431	count	0.0100827
27180	NDUFB8	683	NDUFB8	OK	StudyFetal.Zhong.2018	1.16892	0.202472	5.7732	8.5e-09	1.65585	count	0.000275383
27210	NDUFS5	928	NDUFS5	OK	StudyFetal.Zhong.2018	1.1386	0.187292	6.0793	1.35e-09	1.61548	count	4.3817e-05
27216	NDUFS6	727	NDUFS6	OK	StudyFetal.Zhong.2018	1.17589	0.218435	5.3832	7.83e-08	1.65948	count	0.00252862
27222	NDUFS8	463	NDUFS8	OK	StudyFetal.Zhong.2018	2.04277	0.24155	8.4569	4.08e-17	2.86189	count	1.33547e-12
27237	NEAT1	2616	NEAT1	OK	StudyFetal.Zhong.2018	-2.10612	0.314702	-6.6924	2.57e-11	-2.95526	count	8.36664e-07
27279	NEDD8	143	NEDD8	OK	StudyFetal.Zhong.2018	1.20941	0.184397	6.5588	6.29e-11	1.70544	count	2.04645e-06
27393	NFASC	1371	NFASC	OK	StudyFetal.Zhong.2018	-1.78015	0.328514	-5.4188	6.44e-08	-2.51662	count	0.00208044
27486	NGRN	123	NGRN	OK	StudyFetal.Zhong.2018	1.56721	0.0719453	21.7833	2.47e-98	2.21165	count	8.12358e-94
27504	NHP2	476	NHP2	OK	StudyFetal.Zhong.2018	1.23724	0.241931	5.114	3.34e-07	1.73654	count	0.0107578
27585	NKAIN2	2512	NKAIN2	OK	StudyFetal.Zhong.2018	-2.62046	0.381619	-6.8667	7.83e-12	-3.66105	count	2.55101e-07
27618	NKX2-2	101	NKX2-2	OK	StudyFetal.Zhong.2018	1.12952	0.0973435	11.6034	1.56e-30	1.58286	count	5.1232e-26
27660	NME1	107	NME1	OK	StudyFetal.Zhong.2018	4.36945	0.6389	6.839	9.48e-12	5.47818	count	3.0882e-07
27672	NME4	66	NME4	OK	StudyFetal.Zhong.2018	2.73403	0.501102	5.456	5.23e-08	3.5898	count	0.00169034
27717	NNT-AS1	28	NNT-AS1	OK	StudyFetal.Zhong.2018	3.74084	0.287782	12.9989	1.06e-37	3.89009	count	3.48401e-33
27741	NOL12	45	NOL12	OK	StudyFetal.Zhong.2018	1.61488	0.147712	10.9326	2.39e-27	2.14217	count	7.84422e-23
27780	NOP10	277	NOP10	OK	StudyFetal.Zhong.2018	2.15924	0.332315	6.4976	9.41e-11	2.96316	count	3.0606e-06
27858	NPAS3	2571	NPAS3	OK	StudyFetal.Zhong.2018	-1.73193	0.247617	-6.9944	3.22e-12	-2.44757	count	1.04956e-07
27873	NPDC1	159	NPDC1	OK	StudyFetal.Zhong.2018	1.6443	0.268659	6.1204	1.04e-09	2.29727	count	3.37636e-05
27930	NPM1	423	NPM1	OK	StudyFetal.Zhong.2018	2.44985	0.273584	8.9547	5.6e-19	3.41077	count	1.83467e-14
28023	NREP	75	NREP	OK	StudyFetal.Zhong.2018	4.1463	0.833594	4.974	6.9e-07	4.79955	count	0.0221904
28065	NRXN1	467	NRXN1	OK	StudyFetal.Zhong.2018	2.36797	0.322927	7.3328	2.83e-13	3.28427	count	9.2391e-09
28071	NRXN3	2206	NRXN3	OK	StudyFetal.Zhong.2018	-2.96194	0.486665	-6.0862	1.29e-09	-4.11255	count	4.18708e-05
28233	NUDC	572	NUDC	OK	StudyFetal.Zhong.2018	1.22203	0.235521	5.1886	2.25e-07	1.71959	count	0.00725423
28245	NUDT1	178	NUDT1	OK	StudyFetal.Zhong.2018	2.35454	0.443031	5.3146	1.14e-07	3.12695	count	0.00367924
28383	NUPL2	257	NUPL2	OK	StudyFetal.Zhong.2018	1.94908	0.388389	5.0184	5.49e-07	2.64469	count	0.0176641
28392	NUTF2	227	NUTF2	OK	StudyFetal.Zhong.2018	2.13682	0.38617	5.5334	3.39e-08	2.88308	count	0.00109639
28398	NUTM2B-AS1	57	NUTM2B-AS1	OK	StudyFetal.Zhong.2018	0.878638	0.135156	6.5009	9.2e-11	1.17943	count	2.99248e-06
28497	OIP5-AS1	138	OIP5-AS1	OK	StudyFetal.Zhong.2018	-1.8147	0.20047	-9.0522	2.35e-19	-2.47721	count	7.70142e-15
28512	OLIG1	1446	OLIG1	OK	StudyFetal.Zhong.2018	0.640563	0.124847	5.1308	3.05e-07	0.917579	count	0.00982588
28545	OPHN1	290	OPHN1	OK	StudyFetal.Zhong.2018	3.80983	0.41173	9.2532	3.83e-20	5.14686	count	1.25559e-15
28608	ORMDL1	329	ORMDL1	OK	StudyFetal.Zhong.2018	1.61791	0.30149	5.3664	8.59e-08	2.24158	count	0.00277337
28629	OSBPL1A	1852	OSBPL1A	OK	StudyFetal.Zhong.2018	-3.00204	0.595426	-5.0418	4.86e-07	-4.09648	count	0.0156419
28701	OTUD6B-AS1	88	OTUD6B-AS1	OK	StudyFetal.Zhong.2018	0.828488	0.10097	8.2053	3.27e-16	1.15057	count	1.06998e-11
28749	P2RX5-TAX1BP3	62	P2RX5-TAX1BP3	OK	StudyFetal.Zhong.2018	-1.83511	0.341248	-5.3776	8.08e-08	-2.27193	count	0.00260911
28848	PAFAH1B3	135	PAFAH1B3	OK	StudyFetal.Zhong.2018	3.37745	0.39189	8.6183	1.04e-17	4.56641	count	3.40527e-13
28857	PAGR1	44	PAGR1	OK	StudyFetal.Zhong.2018	1.6614	0.170243	9.759	3.39e-22	2.04941	count	1.11182e-17
28983	PARK7	852	PARK7	OK	StudyFetal.Zhong.2018	1.2825	0.184248	6.9607	4.08e-12	1.81918	count	1.32979e-07
29055	PAXIP1-AS1	47	PAXIP1-AS1	OK	StudyFetal.Zhong.2018	1.27574	0.144026	8.8577	1.32e-18	1.69115	count	4.32392e-14
29130	PCDH20	29	PCDH20	OK	StudyFetal.Zhong.2018	3.80146	0.278004	13.6742	1.97e-41	3.97375	count	6.47578e-37
29136	PCDH9	3211	PCDH9	OK	StudyFetal.Zhong.2018	-1.71059	0.106456	-16.0684	5.67e-56	-2.44791	count	1.86435e-51
29358	PCSK1N	436	PCSK1N	OK	StudyFetal.Zhong.2018	3.49398	0.443829	7.8723	4.7e-15	4.64458	count	1.53648e-10
29412	PDCD5	431	PDCD5	OK	StudyFetal.Zhong.2018	2.04536	0.26999	7.5757	4.63e-14	2.85	count	1.51253e-09
29457	PDE4B	2874	PDE4B	OK	StudyFetal.Zhong.2018	-0.792587	0.126411	-6.2699	4.09e-10	-1.13219	count	1.32905e-05
29496	PDGFRA	136	PDGFRA	OK	StudyFetal.Zhong.2018	4.64032	0.613324	7.5659	4.98e-14	5.97398	count	1.62677e-09
29580	PDXDC2P	19	PDXDC2P	OK	StudyFetal.Zhong.2018	1.37372	0.227713	6.0327	1.79e-09	1.57284	count	5.80819e-05
29586	PDZD11	113	PDZD11	OK	StudyFetal.Zhong.2018	2.2561	0.448773	5.0273	5.24e-07	2.97339	count	0.0168613
29661	PET100	348	PET100	OK	StudyFetal.Zhong.2018	1.45264	0.260825	5.5694	2.76e-08	2.0346	count	0.00089297
29721	PFDN1	479	PFDN1	OK	StudyFetal.Zhong.2018	1.33116	0.267319	4.9797	6.7e-07	1.85738	count	0.0215492
29730	PFDN5	828	PFDN5	OK	StudyFetal.Zhong.2018	1.6614	0.188258	8.8251	1.75e-18	2.35788	count	5.73213e-14
29757	PGAM1	178	PGAM1	OK	StudyFetal.Zhong.2018	2.02912	0.280473	7.2347	5.79e-13	2.82257	count	1.88928e-08
29850	PHB2	280	PHB2	OK	StudyFetal.Zhong.2018	1.69039	0.347664	4.8621	1.22e-06	2.31073	count	0.0391888
29946	PHLPP1	2630	PHLPP1	OK	StudyFetal.Zhong.2018	-1.94238	0.23763	-8.174	4.22e-16	-2.75455	count	1.38053e-11
29955	PHPT1	438	PHPT1	OK	StudyFetal.Zhong.2018	1.50959	0.251281	6.0076	2.09e-09	2.1174	count	6.78038e-05
30009	PICALM	1919	PICALM	OK	StudyFetal.Zhong.2018	-2.26481	0.453396	-4.9952	6.19e-07	-3.13655	count	0.0199114
30123	PIK3R2	59	PIK3R2	OK	StudyFetal.Zhong.2018	0.881239	0.149178	5.9073	3.84e-09	1.1467	count	0.000124516
30165	PIP4K2A	3049	PIP4K2A	OK	StudyFetal.Zhong.2018	-2.96713	0.257172	-11.5375	3.27e-30	-4.19056	count	1.07384e-25
30252	PKIA	162	PKIA	OK	StudyFetal.Zhong.2018	2.5087	0.481875	5.2061	2.05e-07	3.2469	count	0.00661084
30261	PKM	583	PKM	OK	StudyFetal.Zhong.2018	1.08432	0.206844	5.2422	1.69e-07	1.53591	count	0.0054516
30300	PLA2G16	2243	PLA2G16	OK	StudyFetal.Zhong.2018	-2.24909	0.322049	-6.9837	3.47e-12	-3.17258	count	1.13101e-07
30363	PLCL1	2531	PLCL1	OK	StudyFetal.Zhong.2018	-3.7185	0.710279	-5.2353	1.75e-07	-4.9183	count	0.00564427
30414	PLEKHB1	1787	PLEKHB1	OK	StudyFetal.Zhong.2018	-1.1887	0.203146	-5.8515	5.36e-09	-1.69538	count	0.00017376
30489	PLP1	3153	PLP1	OK	StudyFetal.Zhong.2018	-1.66928	0.10923	-15.2822	5.64e-51	-2.39579	count	1.85432e-46
30573	PMF1	71	PMF1	OK	StudyFetal.Zhong.2018	1.22608	0.126738	9.6742	7.61e-22	1.65866	count	2.49555e-17
30588	PMP2	443	PMP2	OK	StudyFetal.Zhong.2018	2.10565	0.23577	8.9309	6.91e-19	2.95603	count	2.26379e-14
30591	PMP22	1705	PMP22	OK	StudyFetal.Zhong.2018	-2.59952	0.445249	-5.8383	5.79e-09	-3.63105	count	0.000187683
30606	PMS2P1	27	PMS2P1	OK	StudyFetal.Zhong.2018	1.76676	0.229996	7.6817	2.06e-14	2.12827	count	6.73208e-10
30786	POLR2E	145	POLR2E	OK	StudyFetal.Zhong.2018	1.23791	0.253675	4.8799	1.11e-06	1.73918	count	0.0356632
30792	POLR2G	497	POLR2G	OK	StudyFetal.Zhong.2018	1.23854	0.238907	5.1842	2.3e-07	1.74164	count	0.00741451
30801	POLR2J	513	POLR2J	OK	StudyFetal.Zhong.2018	1.3173	0.25425	5.1811	2.34e-07	1.84927	count	0.00754322
30810	POLR2L	519	POLR2L	OK	StudyFetal.Zhong.2018	1.74548	0.26263	6.6462	3.51e-11	2.43888	count	1.14236e-06
30870	POMP	634	POMP	OK	StudyFetal.Zhong.2018	1.81555	0.215739	8.4155	5.78e-17	2.55985	count	1.89174e-12
30894	POP7	235	POP7	OK	StudyFetal.Zhong.2018	1.80248	0.335364	5.3747	8.21e-08	2.46551	count	0.00265084
30987	PPIA	495	PPIA	OK	StudyFetal.Zhong.2018	1.10392	0.129648	8.5147	2.51e-17	1.58184	count	8.21724e-13
31086	PPP1R10	346	PPP1R10	OK	StudyFetal.Zhong.2018	1.81555	0.351364	5.1671	2.52e-07	2.47142	count	0.00812272
31188	PPP2R1A	490	PPP2R1A	OK	StudyFetal.Zhong.2018	1.50317	0.233304	6.443	1.34e-10	2.11612	count	4.35741e-06
31197	PPP2R2B	2756	PPP2R2B	OK	StudyFetal.Zhong.2018	-0.698528	0.126496	-5.5221	3.61e-08	-0.998928	count	0.0011674
31293	PPT2	30	PPT2	OK	StudyFetal.Zhong.2018	0.968251	0.19	5.0961	3.67e-07	1.22614	count	0.0118185
31368	PRDX2	287	PRDX2	OK	StudyFetal.Zhong.2018	1.74004	0.193265	9.0034	3.64e-19	2.46852	count	1.19279e-14
31374	PRDX4	279	PRDX4	OK	StudyFetal.Zhong.2018	1.63989	0.287053	5.7129	1.21e-08	2.27277	count	0.000391858
31377	PRDX5	533	PRDX5	OK	StudyFetal.Zhong.2018	1.98157	0.270531	7.3247	3e-13	2.76984	count	9.7929e-09
31482	PRKCQ-AS1	68	PRKCQ-AS1	OK	StudyFetal.Zhong.2018	-1.37115	0.231683	-5.9182	3.59e-09	-1.7973	count	0.000116424
31518	PRMT1	350	PRMT1	OK	StudyFetal.Zhong.2018	1.87912	0.320802	5.8576	5.16e-09	2.58799	count	0.000167298
31674	PRRT2	23	PRRT2	OK	StudyFetal.Zhong.2018	3.60731	0.402385	8.9648	5.12e-19	3.04366	count	1.67757e-14
31692	PRUNE2	2310	PRUNE2	OK	StudyFetal.Zhong.2018	-3.04452	0.487187	-6.2492	4.66e-10	-4.20095	count	1.51399e-05
31734	PSMA1	131	PSMA1	OK	StudyFetal.Zhong.2018	1.46073	0.268224	5.4459	5.54e-08	2.04343	count	0.00179036
31737	PSMA2	117	PSMA2	OK	StudyFetal.Zhong.2018	1.47908	0.0767529	19.2706	1.86e-78	2.07914	count	6.11698e-74
31746	PSMA4	418	PSMA4	OK	StudyFetal.Zhong.2018	1.53734	0.278775	5.5146	3.77e-08	2.14621	count	0.0012191
31752	PSMA6	126	PSMA6	OK	StudyFetal.Zhong.2018	1.63109	0.241932	6.7419	1.84e-11	2.28708	count	5.99196e-07
31758	PSMA7	926	PSMA7	OK	StudyFetal.Zhong.2018	1.46379	0.171936	8.5136	2.54e-17	2.08209	count	8.3152e-13
31761	PSMB1	790	PSMB1	OK	StudyFetal.Zhong.2018	0.934349	0.179027	5.219	1.91e-07	1.32905	count	0.00615994
31767	PSMB2	472	PSMB2	OK	StudyFetal.Zhong.2018	1.28459	0.238837	5.3785	8.04e-08	1.80671	count	0.00259628
31770	PSMB3	473	PSMB3	OK	StudyFetal.Zhong.2018	1.54745	0.256068	6.0431	1.68e-09	2.16593	count	5.45194e-05
31776	PSMB5	184	PSMB5	OK	StudyFetal.Zhong.2018	1.45376	0.232613	6.2497	4.65e-10	2.04435	count	1.51078e-05
31779	PSMB6	559	PSMB6	OK	StudyFetal.Zhong.2018	1.19139	0.22971	5.1865	2.27e-07	1.68159	count	0.00731848
31791	PSMC1	131	PSMC1	OK	StudyFetal.Zhong.2018	3.42239	0.509658	6.7151	2.21e-11	4.51162	count	7.19532e-07
31797	PSMC3	344	PSMC3	OK	StudyFetal.Zhong.2018	2.04916	0.326944	6.2676	4.15e-10	2.83284	count	1.3485e-05
31836	PSMD4	453	PSMD4	OK	StudyFetal.Zhong.2018	2.17761	0.298619	7.2923	3.81e-13	3.01264	count	1.24358e-08
31854	PSMD8	550	PSMD8	OK	StudyFetal.Zhong.2018	1.22145	0.206467	5.9159	3.64e-09	1.72884	count	0.000118042
31947	PTGDS	3053	PTGDS	OK	StudyFetal.Zhong.2018	-2.21645	0.179793	-12.3278	3.66e-34	-3.15972	count	1.20249e-29
31971	PTK2	2188	PTK2	OK	StudyFetal.Zhong.2018	-1.24185	0.21215	-5.8537	5.29e-09	-1.76637	count	0.000171507
31977	PTMA	2545	PTMA	OK	StudyFetal.Zhong.2018	0.994226	0.0906789	10.9642	1.7e-27	1.42498	count	5.57974e-23
31995	PTN	901	PTN	OK	StudyFetal.Zhong.2018	1.79927	0.174763	10.2955	1.74e-24	2.55525	count	5.70824e-20
32007	PTP4A2	815	PTP4A2	OK	StudyFetal.Zhong.2018	-1.52653	0.314018	-4.8613	1.22e-06	-2.16284	count	0.0391888
32070	PTPRD	3007	PTPRD	OK	StudyFetal.Zhong.2018	-1.77719	0.159861	-11.1171	3.31e-28	-2.53232	count	1.08654e-23
32091	PTPRK	2486	PTPRK	OK	StudyFetal.Zhong.2018	-2.19454	0.312617	-7.0199	2.69e-12	-3.08181	count	8.77021e-08
32115	PTPRZ1	293	PTPRZ1	OK	StudyFetal.Zhong.2018	4.74592	0.647879	7.3253	2.99e-13	6.20847	count	9.76056e-09
32136	PUF60	541	PUF60	OK	StudyFetal.Zhong.2018	1.36029	0.220245	6.1763	7.37e-10	1.92115	count	2.39355e-05
32211	PXK	2046	PXK	OK	StudyFetal.Zhong.2018	-1.63444	0.263336	-6.2067	6.09e-10	-2.3154	count	1.97797e-05
32256	QDPR	1086	QDPR	OK	StudyFetal.Zhong.2018	-1.36625	0.23528	-5.8069	6.97e-09	-1.94957	count	0.00022587
32259	QKI	3101	QKI	OK	StudyFetal.Zhong.2018	-1.30185	0.101183	-12.8662	5.45e-37	-1.86535	count	1.7912e-32
32310	RAB11B-AS1	26	RAB11B-AS1	OK	StudyFetal.Zhong.2018	1.6614	0.223487	7.434	1.34e-13	1.94723	count	4.37604e-09
32373	RAB30-AS1	71	RAB30-AS1	OK	StudyFetal.Zhong.2018	-2.0149	0.326718	-6.1671	7.81e-10	-2.51785	count	2.53638e-05
32376	RAB31	293	RAB31	OK	StudyFetal.Zhong.2018	2.20794	0.307741	7.1747	8.93e-13	3.04114	count	2.91341e-08
32463	RABAC1	910	RABAC1	OK	StudyFetal.Zhong.2018	1.22516	0.221359	5.5347	3.36e-08	1.7279	count	0.00108676
32622	RAMP1	282	RAMP1	OK	StudyFetal.Zhong.2018	3.85862	0.487329	7.9179	3.28e-15	5.05516	count	1.07243e-10
32628	RAN	447	RAN	OK	StudyFetal.Zhong.2018	1.37656	0.203269	6.7721	1.5e-11	1.9503	count	4.88535e-07
32691	RAPGEF5	2108	RAPGEF5	OK	StudyFetal.Zhong.2018	-3.43643	0.66518	-5.1662	2.53e-07	-4.64736	count	0.0081547
32940	RBM7	38	RBM7	OK	StudyFetal.Zhong.2018	1.11485	0.194087	5.7441	1.01e-08	1.43106	count	0.000327139
32943	RBM8A	257	RBM8A	OK	StudyFetal.Zhong.2018	1.45478	0.252357	5.7648	8.94e-09	2.04239	count	0.00028962
32955	RBMX	620	RBMX	OK	StudyFetal.Zhong.2018	1.19456	0.209249	5.7088	1.24e-08	1.69249	count	0.000401549
32964	RBP1	370	RBP1	OK	StudyFetal.Zhong.2018	1.53623	0.250218	6.1396	9.27e-10	2.15278	count	3.01006e-05
33018	RCN1	88	RCN1	OK	StudyFetal.Zhong.2018	2.86537	0.576069	4.974	6.9e-07	3.64452	count	0.0221904
33021	RCN2	596	RCN2	OK	StudyFetal.Zhong.2018	1.17822	0.218674	5.388	7.63e-08	1.66382	count	0.00246411
33030	RDH11	217	RDH11	OK	StudyFetal.Zhong.2018	1.09042	0.183007	5.9583	2.82e-09	1.55208	count	9.14667e-05
33255	RGCC	1841	RGCC	OK	StudyFetal.Zhong.2018	-1.32428	0.233548	-5.6703	1.55e-08	-1.88448	count	0.000501859
33339	RHEB	340	RHEB	OK	StudyFetal.Zhong.2018	1.81903	0.322715	5.6366	1.88e-08	2.51397	count	0.000608612
33342	RHNO1	43	RHNO1	OK	StudyFetal.Zhong.2018	1.93333	0.169363	11.4153	1.27e-29	2.52152	count	4.16992e-25
33357	RHOC	116	RHOC	OK	StudyFetal.Zhong.2018	3.0247	0.492758	6.1383	9.34e-10	3.94603	count	3.0326e-05
33507	RNASE1	1885	RNASE1	OK	StudyFetal.Zhong.2018	-1.83786	0.285006	-6.4485	1.3e-10	-2.61092	count	4.22747e-06
59259	RNASEH1-AS1	11	RNASEH1-AS1	OK	StudyFetal.Zhong.2018	1.94908	0.360455	5.4073	6.86e-08	1.8478	count	0.00221592
33522	RNASEH2C	312	RNASEH2C	OK	StudyFetal.Zhong.2018	1.6614	0.319683	5.197	2.15e-07	2.29275	count	0.00693225
33546	RNF103	99	RNF103	OK	StudyFetal.Zhong.2018	-1.23688	0.181851	-6.8016	1.23e-11	-1.68179	count	4.0066e-07
33690	RNF216P1	51	RNF216P1	OK	StudyFetal.Zhong.2018	1.01704	0.147542	6.8932	6.52e-12	1.38204	count	2.12428e-07
33705	RNF220	2633	RNF220	OK	StudyFetal.Zhong.2018	-3.00047	0.394933	-7.5974	3.92e-14	-4.16778	count	1.28078e-09
33747	RNF7	335	RNF7	OK	StudyFetal.Zhong.2018	1.79797	0.301056	5.9722	2.59e-09	2.48407	count	8.40118e-05
33768	RNMT	434	RNMT	OK	StudyFetal.Zhong.2018	2.6308	0.511896	5.1393	2.92e-07	3.38963	count	0.00940795
33780	RNPS1	396	RNPS1	OK	StudyFetal.Zhong.2018	1.28296	0.257819	4.9762	6.82e-07	1.79638	count	0.0219345
33873	ROMO1	299	ROMO1	OK	StudyFetal.Zhong.2018	1.6614	0.25169	6.601	4.75e-11	2.3273	count	1.54579e-06
33903	RP9P	22	RP9P	OK	StudyFetal.Zhong.2018	1.99787	0.285267	7.0035	3.02e-12	2.1892	count	9.84429e-08
33915	RPAIN	425	RPAIN	OK	StudyFetal.Zhong.2018	1.33716	0.270062	4.9513	7.75e-07	1.86684	count	0.0249193
33951	RPL10	1536	RPL10	OK	StudyFetal.Zhong.2018	1.39658	0.123483	11.3099	4.06e-29	1.99751	count	1.33294e-24
33954	RPL10A	1024	RPL10A	OK	StudyFetal.Zhong.2018	1.2918	0.163083	7.9211	3.2e-15	1.84078	count	1.04634e-10
33978	RPL11	1784	RPL11	OK	StudyFetal.Zhong.2018	0.96466	0.129307	7.4602	1.1e-13	1.37919	count	3.59249e-09
33981	RPL12	941	RPL12	OK	StudyFetal.Zhong.2018	1.64217	0.193772	8.4747	3.52e-17	2.32634	count	1.15224e-12
33993	RPL13	1792	RPL13	OK	StudyFetal.Zhong.2018	1.32197	0.115637	11.4321	1.06e-29	1.89192	count	3.48062e-25
34011	RPL14	899	RPL14	OK	StudyFetal.Zhong.2018	1.92609	0.236143	8.1565	4.87e-16	2.70743	count	1.59312e-11
34017	RPL15	467	RPL15	OK	StudyFetal.Zhong.2018	0.965522	0.131113	7.364	2.25e-13	1.38341	count	7.34648e-09
34032	RPL18	1522	RPL18	OK	StudyFetal.Zhong.2018	1.29567	0.134729	9.6169	1.31e-21	1.85083	count	4.29575e-17
34035	RPL18A	773	RPL18A	OK	StudyFetal.Zhong.2018	2.62719	0.205675	12.7735	1.7e-36	3.71373	count	5.58688e-32
34047	RPL19	1760	RPL19	OK	StudyFetal.Zhong.2018	0.745107	0.129612	5.7487	9.82e-09	1.06569	count	0.00031808
34080	RPL22	382	RPL22	OK	StudyFetal.Zhong.2018	1.37117	0.198494	6.9079	5.89e-12	1.94632	count	1.91926e-07
34089	RPL23A	1389	RPL23A	OK	StudyFetal.Zhong.2018	1.71697	0.159781	10.7457	1.71e-26	2.44421	count	5.61154e-22
34107	RPL23AP82	31	RPL23AP82	OK	StudyFetal.Zhong.2018	1.47908	0.243598	6.0718	1.41e-09	1.82767	count	4.5763e-05
34110	RPL24	1247	RPL24	OK	StudyFetal.Zhong.2018	1.55854	0.168439	9.2529	3.85e-20	2.21526	count	1.26211e-15
34116	RPL26	499	RPL26	OK	StudyFetal.Zhong.2018	1.61594	0.185008	8.7344	3.84e-18	2.29806	count	1.25752e-13
34122	RPL27	953	RPL27	OK	StudyFetal.Zhong.2018	1.07588	0.178414	6.0303	1.82e-09	1.53115	count	5.90535e-05
34125	RPL27A	1387	RPL27A	OK	StudyFetal.Zhong.2018	1.35391	0.143241	9.452	6.14e-21	1.93281	count	2.01312e-16
34137	RPL29	1126	RPL29	OK	StudyFetal.Zhong.2018	2.09218	0.198895	10.519	1.8e-25	2.9561	count	5.90598e-21
34143	RPL3	1525	RPL3	OK	StudyFetal.Zhong.2018	2.23194	0.175913	12.6878	4.85e-36	3.15656	count	1.59381e-31
34146	RPL30	1244	RPL30	OK	StudyFetal.Zhong.2018	0.968251	0.137497	7.042	2.3e-12	1.38514	count	7.49984e-08
34152	RPL31	1121	RPL31	OK	StudyFetal.Zhong.2018	1.33492	0.146263	9.1268	1.21e-19	1.90693	count	3.96565e-15
34158	RPL32	1584	RPL32	OK	StudyFetal.Zhong.2018	1.25378	0.136069	9.2143	5.46e-20	1.79154	count	1.78979e-15
34167	RPL34	1521	RPL34	OK	StudyFetal.Zhong.2018	1.20654	0.137113	8.7996	2.18e-18	1.72479	count	7.14015e-14
34170	RPL35	1434	RPL35	OK	StudyFetal.Zhong.2018	1.04479	0.170232	6.1374	9.4e-10	1.48664	count	3.05199e-05
34173	RPL35A	1131	RPL35A	OK	StudyFetal.Zhong.2018	1.23144	0.159571	7.7172	1.57e-14	1.75519	count	5.13107e-10
34176	RPL36	1241	RPL36	OK	StudyFetal.Zhong.2018	1.61914	0.15676	10.3288	1.25e-24	2.30491	count	4.101e-20
34182	RPL36AL	728	RPL36AL	OK	StudyFetal.Zhong.2018	1.82953	0.230131	7.95	2.55e-15	2.57418	count	8.33876e-11
34185	RPL37	1169	RPL37	OK	StudyFetal.Zhong.2018	1.11558	0.143156	7.7927	8.75e-15	1.59439	count	2.8602e-10
34188	RPL37A	1747	RPL37A	OK	StudyFetal.Zhong.2018	0.914905	0.125989	7.2618	4.75e-13	1.30894	count	1.55016e-08
34200	RPL39	245	RPL39	OK	StudyFetal.Zhong.2018	3.46237	0.373146	9.2789	3.03e-20	4.71882	count	9.93385e-16
34215	RPL4	1010	RPL4	OK	StudyFetal.Zhong.2018	0.839039	0.160209	5.2371	1.73e-07	1.19835	count	0.00557994
34218	RPL41	432	RPL41	OK	StudyFetal.Zhong.2018	2.26753	0.205669	11.0252	8.89e-28	3.20764	count	2.91814e-23
34227	RPL5	1130	RPL5	OK	StudyFetal.Zhong.2018	0.985888	0.139138	7.0857	1.69e-12	1.40974	count	5.5116e-08
34245	RPL6	1040	RPL6	OK	StudyFetal.Zhong.2018	3.05461	0.251673	12.1372	3.45e-33	4.26412	count	1.13336e-28
34248	RPL7	1000	RPL7	OK	StudyFetal.Zhong.2018	5.35527	0.624183	8.5796	1.45e-17	6.89143	count	4.74745e-13
34251	RPL7A	1317	RPL7A	OK	StudyFetal.Zhong.2018	1.39538	0.167556	8.3278	1.2e-16	1.98236	count	3.92712e-12
34257	RPL7L1	181	RPL7L1	OK	StudyFetal.Zhong.2018	1.84372	0.332174	5.5505	3.08e-08	2.54643	count	0.00099638
34260	RPL8	1325	RPL8	OK	StudyFetal.Zhong.2018	1.74364	0.158438	11.0052	1.1e-27	2.48249	count	3.61064e-23
34263	RPL9	1051	RPL9	OK	StudyFetal.Zhong.2018	3.08182	0.25096	12.2801	6.43e-34	4.30318	count	2.11245e-29
34269	RPLP0	756	RPLP0	OK	StudyFetal.Zhong.2018	2.48588	0.217074	11.4518	8.48e-30	3.498	count	2.78466e-25
34278	RPLP1	1910	RPLP1	OK	StudyFetal.Zhong.2018	1.28802	0.117995	10.9159	2.85e-27	1.8434	count	9.3537e-23
34284	RPLP2	1901	RPLP2	OK	StudyFetal.Zhong.2018	1.02109	0.128932	7.9197	3.24e-15	1.45914	count	1.05938e-10
34335	RPS11	1444	RPS11	OK	StudyFetal.Zhong.2018	0.89364	0.132564	6.7412	1.85e-11	1.27835	count	6.02434e-07
34341	RPS12	1297	RPS12	OK	StudyFetal.Zhong.2018	0.838633	0.156026	5.3749	8.2e-08	1.19734	count	0.0026477
34344	RPS13	1023	RPS13	OK	StudyFetal.Zhong.2018	0.964832	0.141817	6.8034	1.21e-11	1.38003	count	3.94158e-07
34350	RPS14	1490	RPS14	OK	StudyFetal.Zhong.2018	1.50893	0.133413	11.3102	4.04e-29	2.15478	count	1.32641e-24
34353	RPS15	1869	RPS15	OK	StudyFetal.Zhong.2018	1.54424	0.123846	12.4691	6.79e-35	2.20562	count	2.23106e-30
34356	RPS15A	826	RPS15A	OK	StudyFetal.Zhong.2018	1.16786	0.176068	6.633	3.84e-11	1.66238	count	1.24973e-06
34371	RPS18	1453	RPS18	OK	StudyFetal.Zhong.2018	1.56609	0.158806	9.8617	1.26e-22	2.22838	count	4.13267e-18
34377	RPS19	1646	RPS19	OK	StudyFetal.Zhong.2018	1.66694	0.135598	12.2932	5.51e-34	2.37953	count	1.81026e-29
34389	RPS20	1198	RPS20	OK	StudyFetal.Zhong.2018	1.04152	0.175893	5.9214	3.52e-09	1.48137	count	0.000114161
34401	RPS23	1144	RPS23	OK	StudyFetal.Zhong.2018	1.27144	0.1567	8.1138	6.88e-16	1.81322	count	2.25052e-11
34410	RPS24	1321	RPS24	OK	StudyFetal.Zhong.2018	1.28983	0.146448	8.8074	2.04e-18	1.84074	count	6.68182e-14
34413	RPS25	1248	RPS25	OK	StudyFetal.Zhong.2018	1.43087	0.171073	8.3641	8.86e-17	2.03299	count	2.8997e-12
34416	RPS26	671	RPS26	OK	StudyFetal.Zhong.2018	3.5332	0.406399	8.6939	5.45e-18	4.75061	count	1.78466e-13
34425	RPS27	1558	RPS27	OK	StudyFetal.Zhong.2018	2.88784	0.22393	12.8962	3.77e-37	4.04945	count	1.23909e-32
34428	RPS27A	1745	RPS27A	OK	StudyFetal.Zhong.2018	0.848037	0.12905	6.5714	5.78e-11	1.21301	count	1.88075e-06
34443	RPS28	1188	RPS28	OK	StudyFetal.Zhong.2018	1.8932	0.216862	8.73	4e-18	2.66338	count	1.30988e-13
34446	RPS29	932	RPS29	OK	StudyFetal.Zhong.2018	0.960528	0.156457	6.1393	9.29e-10	1.37236	count	3.01646e-05
59631	RPS2P32	7	RPS2P32	OK	StudyFetal.Zhong.2018	3.45316	0.417838	8.2643	2.02e-16	2.84435	count	6.61005e-12
34458	RPS3	990	RPS3	OK	StudyFetal.Zhong.2018	1.43972	0.159247	9.0408	2.61e-19	2.052	count	8.55323e-15
34461	RPS3A	785	RPS3A	OK	StudyFetal.Zhong.2018	4.98163	0.600337	8.2981	1.53e-16	6.46374	count	5.00677e-12
34482	RPS4X	1037	RPS4X	OK	StudyFetal.Zhong.2018	1.30553	0.160779	8.12	6.54e-16	1.86034	count	2.13936e-11
34491	RPS5	1176	RPS5	OK	StudyFetal.Zhong.2018	0.835899	0.164476	5.0822	3.94e-07	1.19276	count	0.0126852
34530	RPS7	1026	RPS7	OK	StudyFetal.Zhong.2018	1.39251	0.188886	7.3722	2.12e-13	1.97483	count	6.92222e-09
34536	RPS9	1159	RPS9	OK	StudyFetal.Zhong.2018	0.85531	0.167879	5.0948	3.69e-07	1.21826	count	0.0118822
34539	RPSA	1127	RPSA	OK	StudyFetal.Zhong.2018	1.88454	0.205746	9.1595	8.97e-20	2.65706	count	2.93992e-15
34656	RSL1D1	235	RSL1D1	OK	StudyFetal.Zhong.2018	1.92846	0.281974	6.8391	9.47e-12	2.68714	count	3.08504e-07
34698	RTF1	378	RTF1	OK	StudyFetal.Zhong.2018	1.62058	0.288354	5.6201	2.07e-08	2.25067	count	0.000670018
34722	RTN1	791	RTN1	OK	StudyFetal.Zhong.2018	1.01142	0.20432	4.9502	7.79e-07	1.43303	count	0.0250464
34731	RTN4	2702	RTN4	OK	StudyFetal.Zhong.2018	-1.18983	0.129707	-9.1733	7.92e-20	-1.703	count	2.59594e-15
34842	S100B	2365	S100B	OK	StudyFetal.Zhong.2018	0.777676	0.0972749	7.9946	1.79e-15	1.11496	count	5.8542e-11
34848	S1PR2	25	S1PR2	OK	StudyFetal.Zhong.2018	2.91416	0.420947	6.9229	5.31e-12	2.7782	count	1.73048e-07
34953	SARAF	1298	SARAF	OK	StudyFetal.Zhong.2018	0.851279	0.133651	6.3694	2.16e-10	1.21763	count	7.02151e-06
34980	SAT1	242	SAT1	OK	StudyFetal.Zhong.2018	1.56831	0.304014	5.1587	2.64e-07	2.16736	count	0.00850819
35064	SCAND1	510	SCAND1	OK	StudyFetal.Zhong.2018	2.35454	0.29932	7.8663	4.93e-15	3.25008	count	1.61162e-10
35088	SCARNA9	11	SCARNA9	OK	StudyFetal.Zhong.2018	2.35454	0.339618	6.9329	4.95e-12	2.07193	count	1.61321e-07
35094	SCD	2422	SCD	OK	StudyFetal.Zhong.2018	-1.03106	0.150582	-6.8471	8.97e-12	-1.47518	count	2.92225e-07
35112	SCG3	132	SCG3	OK	StudyFetal.Zhong.2018	4.89022	0.744164	6.5714	5.78e-11	6.07482	count	1.88075e-06
35115	SCG5	677	SCG5	OK	StudyFetal.Zhong.2018	1.34163	0.215978	6.2119	5.9e-10	1.89238	count	1.91644e-05
35190	SCRG1	912	SCRG1	OK	StudyFetal.Zhong.2018	1.6001	0.152499	10.4925	2.36e-25	2.28418	count	7.74316e-21
35235	SDCBP	249	SDCBP	OK	StudyFetal.Zhong.2018	1.68245	0.299347	5.6204	2.07e-08	2.33321	count	0.000670018
35376	SEC61G	387	SEC61G	OK	StudyFetal.Zhong.2018	1.34294	0.245734	5.465	4.98e-08	1.89092	count	0.00160974
35388	SECISBP2L	1246	SECISBP2L	OK	StudyFetal.Zhong.2018	-1.67081	0.334682	-4.9922	6.28e-07	-2.35704	count	0.0202002
35466	SEMA4D	1329	SEMA4D	OK	StudyFetal.Zhong.2018	-2.18163	0.442227	-4.9333	8.49e-07	-3.04546	count	0.0272911
63432	sep-02	73	sep-02	OK	StudyFetal.Zhong.2018	3.71267	0.150913	24.6013	9.86e-123	4.84667	count	3.24315e-118
66354	sep-04	29	sep-04	OK	StudyFetal.Zhong.2018	1.6614	0.208214	7.9793	2.02e-15	2.18025	count	6.60601e-11
62670	sep-06	37	sep-06	OK	StudyFetal.Zhong.2018	5.09539	0.398195	12.7962	1.29e-36	5.07815	count	4.23958e-32
62622	sep-07	83	sep-07	OK	StudyFetal.Zhong.2018	3.02149	0.126046	23.9714	4.27e-117	4.18441	count	1.40445e-112
63312	sep-08	48	sep-08	OK	StudyFetal.Zhong.2018	1.9899	0.16421	12.118	4.31e-33	2.62724	count	1.41584e-28
63909	sep-10	30	sep-10	OK	StudyFetal.Zhong.2018	2.24918	0.208576	10.7835	1.15e-26	2.5204	count	3.77418e-22
35547	SERF2	1317	SERF2	OK	StudyFetal.Zhong.2018	0.715055	0.146606	4.8774	1.13e-06	1.02212	count	0.0363035
35583	SERPINE2	196	SERPINE2	OK	StudyFetal.Zhong.2018	3.59424	0.462319	7.7744	1.01e-14	4.75691	count	3.30129e-10
35691	SF3B4	164	SF3B4	OK	StudyFetal.Zhong.2018	1.61695	0.313871	5.1516	2.74e-07	2.23829	count	0.00882965
35694	SF3B5	408	SF3B5	OK	StudyFetal.Zhong.2018	1.48619	0.281764	5.2746	1.42e-07	2.06863	count	0.0045822
35697	SF3B6	550	SF3B6	OK	StudyFetal.Zhong.2018	1.43825	0.218515	6.5819	5.39e-11	2.03036	count	1.75391e-06
35766	SGK1	2203	SGK1	OK	StudyFetal.Zhong.2018	-2.06217	0.290278	-7.1041	1.48e-12	-2.92087	count	4.82746e-08
35859	SH3GL3	2129	SH3GL3	OK	StudyFetal.Zhong.2018	-1.55276	0.299405	-5.1862	2.28e-07	-2.19128	count	0.00735049
35988	SHTN1	2732	SHTN1	OK	StudyFetal.Zhong.2018	-1.69692	0.196674	-8.6281	9.59e-18	-2.41593	count	3.14015e-13
36015	SIK3	2549	SIK3	OK	StudyFetal.Zhong.2018	-2.43295	0.31781	-7.6553	2.52e-14	-3.41513	count	8.23486e-10
36069	SKA2	259	SKA2	OK	StudyFetal.Zhong.2018	1.91271	0.372692	5.1321	3.03e-07	2.59882	count	0.00976175
36093	SKP1	1314	SKP1	OK	StudyFetal.Zhong.2018	0.723128	0.128005	5.6492	1.75e-08	1.03534	count	0.000566563
36102	SLAIN1	2097	SLAIN1	OK	StudyFetal.Zhong.2018	-1.39816	0.247083	-5.6587	1.66e-08	-1.98086	count	0.000537442
36156	SLC16A1-AS1	48	SLC16A1-AS1	OK	StudyFetal.Zhong.2018	-2.18875	0.429886	-5.0915	3.75e-07	-2.46677	count	0.0120746
36228	SLC25A11	297	SLC25A11	OK	StudyFetal.Zhong.2018	1.56376	0.317156	4.9306	8.61e-07	2.15672	count	0.027676
36327	SLC25A5	394	SLC25A5	OK	StudyFetal.Zhong.2018	1.20941	0.202484	5.9729	2.58e-09	1.71245	count	8.369e-05
36600	SLC44A1	2822	SLC44A1	OK	StudyFetal.Zhong.2018	-1.53922	0.14378	-10.7054	2.61e-26	-2.2006	count	8.56471e-22
36759	SLCO3A1	1684	SLCO3A1	OK	StudyFetal.Zhong.2018	-2.84506	0.571943	-4.9744	6.88e-07	-3.91544	count	0.0221268
36885	SMC5-AS1	4	SMC5-AS1	OK	StudyFetal.Zhong.2018	3.04769	0.434493	7.0144	2.8e-12	2.95328	count	9.12828e-08
37104	SNHG11	31	SNHG11	OK	StudyFetal.Zhong.2018	1.91271	0.190729	10.0284	2.48e-23	2.4598	count	8.1344e-19
37116	SNHG16	52	SNHG16	OK	StudyFetal.Zhong.2018	2.39537	0.146912	16.3048	1.62e-57	3.08791	count	5.32721e-53
37119	SNHG17	34	SNHG17	OK	StudyFetal.Zhong.2018	2.40334	0.177683	13.526	1.34e-40	3.03764	count	4.40471e-36
37146	SNHG5	88	SNHG5	OK	StudyFetal.Zhong.2018	0.950551	0.0994694	9.5562	2.32e-21	1.31283	count	7.60751e-17
37227	SNRNP25	139	SNRNP25	OK	StudyFetal.Zhong.2018	2.42354	0.482222	5.0258	5.28e-07	3.17349	count	0.0169895
37230	SNRNP27	182	SNRNP27	OK	StudyFetal.Zhong.2018	1.86904	0.373816	4.9999	6.04e-07	2.52583	count	0.0194301
37254	SNRPB2	517	SNRPB2	OK	StudyFetal.Zhong.2018	1.43825	0.219558	6.5507	6.63e-11	2.03036	count	2.15687e-06
37257	SNRPC	383	SNRPC	OK	StudyFetal.Zhong.2018	1.48447	0.239859	6.1889	6.81e-10	2.08396	count	2.21175e-05
37260	SNRPD1	277	SNRPD1	OK	StudyFetal.Zhong.2018	1.89402	0.301326	6.2856	3.7e-10	2.62309	count	1.20243e-05
37263	SNRPD2	657	SNRPD2	OK	StudyFetal.Zhong.2018	1.45009	0.233406	6.2127	5.87e-10	2.04157	count	1.90675e-05
37266	SNRPD3	268	SNRPD3	OK	StudyFetal.Zhong.2018	1.71141	0.331733	5.159	2.63e-07	2.35601	count	0.00847623
37269	SNRPE	315	SNRPE	OK	StudyFetal.Zhong.2018	2.22779	0.279631	7.9669	2.23e-15	3.0989	count	7.29255e-11
37278	SNRPG	380	SNRPG	OK	StudyFetal.Zhong.2018	1.90256	0.252829	7.5251	6.77e-14	2.66013	count	2.21129e-09
37290	SNTG1	205	SNTG1	OK	StudyFetal.Zhong.2018	2.81002	0.508468	5.5264	3.52e-08	3.69738	count	0.00113833
37422	SON	1590	SON	OK	StudyFetal.Zhong.2018	0.613338	0.123977	4.9472	7.91e-07	0.878456	count	0.0254314
37449	SORT1	2060	SORT1	OK	StudyFetal.Zhong.2018	-3.21761	0.483543	-6.6542	3.33e-11	-4.47931	count	1.08385e-06
37491	SOX2-OT	411	SOX2-OT	OK	StudyFetal.Zhong.2018	-1.02711	0.0592966	-17.3215	2.26e-64	-1.47069	count	7.43224e-60
37497	SOX4	122	SOX4	OK	StudyFetal.Zhong.2018	4.36945	0.491069	8.8978	9.25e-19	5.83071	count	3.0303e-14
37503	SOX6	237	SOX6	OK	StudyFetal.Zhong.2018	3.47378	0.594302	5.8451	5.56e-09	4.45458	count	0.000180233
37512	SOX9-AS1	13	SOX9-AS1	OK	StudyFetal.Zhong.2018	1.6614	0.266153	6.2423	4.87e-10	1.65386	count	1.58212e-05
37635	SPCS2	708	SPCS2	OK	StudyFetal.Zhong.2018	1.46528	0.242766	6.0358	1.76e-09	2.05585	count	5.71138e-05
37686	SPIN2B	29	SPIN2B	OK	StudyFetal.Zhong.2018	2.30803	0.192783	11.9721	2.35e-32	2.93776	count	7.71928e-28
37710	SPOCK1	2635	SPOCK1	OK	StudyFetal.Zhong.2018	-2.97817	0.368514	-8.0816	8.92e-16	-4.17418	count	2.91773e-11
37713	SPOCK3	2523	SPOCK3	OK	StudyFetal.Zhong.2018	-3.57858	0.583958	-6.1282	9.95e-10	-4.85091	count	3.23037e-05
37725	SPP1	2660	SPP1	OK	StudyFetal.Zhong.2018	-3.56837	0.490376	-7.2768	4.26e-13	-4.90775	count	1.39042e-08
37773	SPTAN1	267	SPTAN1	OK	StudyFetal.Zhong.2018	1.58908	0.308467	5.1515	2.74e-07	2.19257	count	0.00882965
37788	SPTSSA	68	SPTSSA	OK	StudyFetal.Zhong.2018	-1.19507	0.239781	-4.984	6.55e-07	-1.58655	count	0.0210674
37797	SQLE	517	SQLE	OK	StudyFetal.Zhong.2018	1.49976	0.25333	5.9202	3.55e-09	2.09991	count	0.00011513
37860	SRI	494	SRI	OK	StudyFetal.Zhong.2018	1.27699	0.225447	5.6642	1.61e-08	1.79972	count	0.00052127
37866	SRP14	1452	SRP14	OK	StudyFetal.Zhong.2018	1.11229	0.126652	8.7822	2.54e-18	1.59135	count	8.31875e-14
37929	SRSF10	425	SRSF10	OK	StudyFetal.Zhong.2018	1.32009	0.243469	5.422	6.32e-08	1.85564	count	0.00204187
37971	SSB	559	SSB	OK	StudyFetal.Zhong.2018	1.35691	0.250028	5.427	6.15e-08	1.9063	count	0.001987
37974	SSBP1	469	SSBP1	OK	StudyFetal.Zhong.2018	1.82973	0.253132	7.2284	6.06e-13	2.56292	count	1.97732e-08
38007	SSR2	377	SSR2	OK	StudyFetal.Zhong.2018	1.54745	0.265218	5.8347	5.92e-09	2.16593	count	0.000191879
38013	SSR4	679	SSR4	OK	StudyFetal.Zhong.2018	1.39701	0.213718	6.5367	7.27e-11	1.97318	count	2.36493e-06
38109	STAG3L2	42	STAG3L2	OK	StudyFetal.Zhong.2018	0.91946	0.175412	5.2417	1.69e-07	1.18219	count	0.0054516
60642	STAM-AS1	6	STAM-AS1	OK	StudyFetal.Zhong.2018	1.6614	0.324161	5.1252	3.14e-07	1.50677	count	0.0101146
38262	STMN4	1383	STMN4	OK	StudyFetal.Zhong.2018	1.49306	0.231198	6.4579	1.22e-10	2.09385	count	3.96756e-06
38310	STRAP	332	STRAP	OK	StudyFetal.Zhong.2018	1.28191	0.25489	5.0293	5.19e-07	1.79696	count	0.0167025
38412	SUB1	683	SUB1	OK	StudyFetal.Zhong.2018	1.83988	0.203003	9.0633	2.13e-19	2.60069	count	6.98065e-15
38451	SULF2	118	SULF2	OK	StudyFetal.Zhong.2018	3.48595	0.718295	4.8531	1.27e-06	4.22369	count	0.0407886
38463	SUMO1	271	SUMO1	OK	StudyFetal.Zhong.2018	1.83965	0.300669	6.1185	1.06e-09	2.54327	count	3.44108e-05
38466	SUMO2	211	SUMO2	OK	StudyFetal.Zhong.2018	1.38068	0.191572	7.2071	7.07e-13	1.96258	count	2.30666e-08
38478	SUN2	1494	SUN2	OK	StudyFetal.Zhong.2018	-3.70924	0.751847	-4.9335	8.48e-07	-5.03818	count	0.0272598
38556	SVIL-AS1	45	SVIL-AS1	OK	StudyFetal.Zhong.2018	1.13531	0.158984	7.141	1.14e-12	1.48059	count	3.71891e-08
38565	SWAP70	467	SWAP70	OK	StudyFetal.Zhong.2018	-2.16413	0.396054	-5.4642	5e-08	-3.05575	count	0.00161615
38634	SYNJ2BP	43	SYNJ2BP	OK	StudyFetal.Zhong.2018	1.00747	0.172954	5.8251	6.26e-09	1.32276	count	0.000202893
38658	SYS1	39	SYS1	OK	StudyFetal.Zhong.2018	1.01081	0.186457	5.4212	6.35e-08	1.3171	count	0.00205149
38805	TAGLN3	251	TAGLN3	OK	StudyFetal.Zhong.2018	1.59396	0.32331	4.9301	8.63e-07	2.20569	count	0.0277394
38853	TAPT1-AS1	62	TAPT1-AS1	OK	StudyFetal.Zhong.2018	-1.96294	0.305563	-6.424	1.52e-10	-2.44655	count	4.94213e-06
38988	TBCA	851	TBCA	OK	StudyFetal.Zhong.2018	1.09085	0.199883	5.4575	5.19e-08	1.54686	count	0.00167746
39063	TCEAL2	202	TCEAL2	OK	StudyFetal.Zhong.2018	1.99787	0.320296	6.2376	5.02e-10	2.74996	count	1.6308e-05
39096	TCF12	2252	TCF12	OK	StudyFetal.Zhong.2018	-1.13408	0.220221	-5.1497	2.76e-07	-1.60943	count	0.008893
39162	TDG	207	TDG	OK	StudyFetal.Zhong.2018	2.64223	0.494849	5.3395	9.96e-08	3.43483	count	0.00321509
39195	TECR	856	TECR	OK	StudyFetal.Zhong.2018	1.6614	0.25908	6.4127	1.64e-10	2.31494	count	5.33197e-06
39327	TF	2618	TF	OK	StudyFetal.Zhong.2018	-1.90221	0.185674	-10.2449	2.9e-24	-2.71502	count	9.51316e-20
61011	THSD4-AS1	4	THSD4-AS1	OK	StudyFetal.Zhong.2018	2.35454	0.463477	5.0802	3.98e-07	1.54889	count	0.0128136
39534	THUMPD3-AS1	48	THUMPD3-AS1	OK	StudyFetal.Zhong.2018	1.43825	0.218035	6.5964	4.89e-11	1.72398	count	1.5913e-06
39537	THY1	195	THY1	OK	StudyFetal.Zhong.2018	4.76748	0.871369	5.4712	4.81e-08	5.68202	count	0.00155488
39540	THYN1	238	THYN1	OK	StudyFetal.Zhong.2018	1.52256	0.311124	4.8937	1.04e-06	2.11758	count	0.0334162
39591	TIMM13	458	TIMM13	OK	StudyFetal.Zhong.2018	2.16135	0.291835	7.4061	1.65e-13	2.98947	count	5.38791e-09
39624	TIMM8B	312	TIMM8B	OK	StudyFetal.Zhong.2018	1.63671	0.325989	5.0207	5.42e-07	2.25537	count	0.0174394
39657	TJP1	2112	TJP1	OK	StudyFetal.Zhong.2018	-1.4868	0.280643	-5.2978	1.25e-07	-2.09704	count	0.004034
39747	TMA7	942	TMA7	OK	StudyFetal.Zhong.2018	1.88229	0.194513	9.677	7.41e-22	2.66264	count	2.43004e-17
39780	TMCO1	383	TMCO1	OK	StudyFetal.Zhong.2018	2.01807	0.250207	8.0656	1.01e-15	2.82659	count	3.30351e-11
39849	TMEM11	198	TMEM11	OK	StudyFetal.Zhong.2018	2.16039	0.428094	5.0465	4.75e-07	2.8535	count	0.0152883
39942	TMEM147	550	TMEM147	OK	StudyFetal.Zhong.2018	1.27193	0.233139	5.4557	5.24e-08	1.79207	count	0.00169352
39960	TMEM160	445	TMEM160	OK	StudyFetal.Zhong.2018	2.15609	0.364543	5.9145	3.67e-09	2.9251	count	0.000119007
39969	TMEM161B-AS1	97	TMEM161B-AS1	OK	StudyFetal.Zhong.2018	0.600526	0.124413	4.8269	1.45e-06	0.819643	count	0.0465537
39978	TMEM165	2401	TMEM165	OK	StudyFetal.Zhong.2018	-1.79035	0.246435	-7.265	4.65e-13	-2.53404	count	1.51762e-08
40068	TMEM198B	57	TMEM198B	OK	StudyFetal.Zhong.2018	-2.57271	0.438309	-5.8696	4.81e-09	-2.98459	count	0.000155955
40092	TMEM208	299	TMEM208	OK	StudyFetal.Zhong.2018	1.83833	0.347959	5.2832	1.35e-07	2.50807	count	0.00435645
40173	TMEM251	41	TMEM251	OK	StudyFetal.Zhong.2018	1.38696	0.20205	6.8644	7.96e-12	1.84518	count	2.59329e-07
40353	TMEM97	68	TMEM97	OK	StudyFetal.Zhong.2018	3.14947	0.649348	4.8502	1.29e-06	3.93272	count	0.0414296
40362	TMEM9B	426	TMEM9B	OK	StudyFetal.Zhong.2018	1.35391	0.265866	5.0925	3.73e-07	1.8933	count	0.0120106
40398	TMSB10	721	TMSB10	OK	StudyFetal.Zhong.2018	2.43108	0.190778	12.743	2.47e-36	3.44965	count	8.11716e-32
61242	TMSB15A	61	TMSB15A	OK	StudyFetal.Zhong.2018	4.91949	0.935009	5.2614	1.52e-07	5.5451	count	0.00490413
40401	TMSB4X	2261	TMSB4X	OK	StudyFetal.Zhong.2018	1.70858	0.108903	15.689	1.56e-53	2.44266	count	5.12928e-49
40410	TMTC2	2680	TMTC2	OK	StudyFetal.Zhong.2018	-4.94525	0.988658	-5.002	5.97e-07	-6.33482	count	0.0192055
40572	TOMM5	70	TOMM5	OK	StudyFetal.Zhong.2018	3.74084	0.600598	6.2285	5.31e-10	4.68952	count	1.7249e-05
40575	TOMM6	133	TOMM6	OK	StudyFetal.Zhong.2018	0.554688	0.0829876	6.684	2.72e-11	0.781158	count	8.85414e-07
40578	TOMM7	1007	TOMM7	OK	StudyFetal.Zhong.2018	1.12776	0.194199	5.8072	6.96e-09	1.59859	count	0.000225553
40680	TPI1	783	TPI1	OK	StudyFetal.Zhong.2018	1.70941	0.175578	9.7359	4.23e-22	2.42861	count	1.38727e-17
40692	TPM3	251	TPM3	OK	StudyFetal.Zhong.2018	1.4511	0.295763	4.9063	9.74e-07	2.02129	count	0.0313024
40740	TPT1-AS1	91	TPT1-AS1	OK	StudyFetal.Zhong.2018	-0.823509	0.16376	-5.0288	5.2e-07	-1.11696	count	0.0167341
40800	TRAF3IP2-AS1	74	TRAF3IP2-AS1	OK	StudyFetal.Zhong.2018	1.24154	0.11033	11.253	7.56e-29	1.68319	count	2.48195e-24
40851	TRAPPC2B	37	TRAPPC2B	OK	StudyFetal.Zhong.2018	2.76001	0.209781	13.1566	1.47e-38	3.38697	count	4.83174e-34
40863	TRAPPC5	237	TRAPPC5	OK	StudyFetal.Zhong.2018	2.44692	0.322016	7.5987	3.88e-14	3.37296	count	1.26775e-09
40902	TRIB2	84	TRIB2	OK	StudyFetal.Zhong.2018	3.02827	0.529514	5.719	1.17e-08	4.00716	count	0.000378916
40917	TRIM2	2272	TRIM2	OK	StudyFetal.Zhong.2018	-1.72607	0.237891	-7.2557	4.97e-13	-2.45056	count	1.62191e-08
41073	TRMT2B	416	TRMT2B	OK	StudyFetal.Zhong.2018	-4.91646	0.954473	-5.151	2.75e-07	-6.63748	count	0.00886105
41151	TRUB2	159	TRUB2	OK	StudyFetal.Zhong.2018	2.96068	0.564663	5.2433	1.68e-07	3.77883	count	0.00541951
41172	TSC22D4	391	TSC22D4	OK	StudyFetal.Zhong.2018	-1.06552	0.220117	-4.8407	1.35e-06	-1.52054	count	0.0433485
41238	TSPAN3	518	TSPAN3	OK	StudyFetal.Zhong.2018	0.963056	0.180283	5.3419	9.83e-08	1.37139	count	0.00317322
41247	TSPAN6	56	TSPAN6	OK	StudyFetal.Zhong.2018	3.27084	0.566447	5.7743	8.45e-09	4.02471	count	0.000273772
41250	TSPAN7	320	TSPAN7	OK	StudyFetal.Zhong.2018	3.38756	0.330733	10.2426	2.97e-24	4.64771	count	9.74249e-20
41358	TTC3	1253	TTC3	OK	StudyFetal.Zhong.2018	0.785929	0.161179	4.8761	1.13e-06	1.12042	count	0.0363035
41445	TTLL7	2648	TTLL7	OK	StudyFetal.Zhong.2018	-3.56435	0.486546	-7.3258	2.98e-13	-4.90198	count	9.72821e-09
41484	TUBB	564	TUBB	OK	StudyFetal.Zhong.2018	2.68689	0.226002	11.8887	6.13e-32	3.77818	count	2.0134e-27
41487	TUBB2A	268	TUBB2A	OK	StudyFetal.Zhong.2018	3.33537	0.370639	8.999	3.78e-19	4.53693	count	1.23863e-14
41490	TUBB2B	647	TUBB2B	OK	StudyFetal.Zhong.2018	3.80146	0.338201	11.2403	8.69e-29	5.20518	count	2.85284e-24
41493	TUBB3	73	TUBB3	OK	StudyFetal.Zhong.2018	5.3627	0.258112	20.7766	3.8e-90	6.17715	count	1.24974e-85
41496	TUBB4A	1902	TUBB4A	OK	StudyFetal.Zhong.2018	-1.72373	0.254536	-6.772	1.5e-11	-2.44889	count	4.88535e-07
41499	TUBB4B	380	TUBB4B	OK	StudyFetal.Zhong.2018	1.60583	0.320184	5.0153	5.58e-07	2.20097	count	0.0179531
41574	TWF2	24	TWF2	OK	StudyFetal.Zhong.2018	1.94908	0.229263	8.5015	2.81e-17	2.21148	count	9.19882e-13
41595	TXN2	318	TXN2	OK	StudyFetal.Zhong.2018	1.48206	0.264257	5.6084	2.21e-08	2.07471	count	0.000715244
41610	TXNDC17	169	TXNDC17	OK	StudyFetal.Zhong.2018	2.48808	0.449547	5.5346	3.37e-08	3.2644	count	0.00108996
41619	TXNIP	1384	TXNIP	OK	StudyFetal.Zhong.2018	-1.40906	0.254366	-5.5395	3.27e-08	-2.00509	count	0.00105768
41622	TXNL1	495	TXNL1	OK	StudyFetal.Zhong.2018	1.31656	0.255036	5.1622	2.59e-07	1.8434	count	0.00834783
41646	TYMSOS	85	TYMSOS	OK	StudyFetal.Zhong.2018	-1.72299	0.235577	-7.3139	3.25e-13	-2.28533	count	1.06087e-08
41757	UBB	1967	UBB	OK	StudyFetal.Zhong.2018	0.686241	0.0936184	7.3302	2.88e-13	0.985232	count	9.40205e-09
41802	UBE2E3	543	UBE2E3	OK	StudyFetal.Zhong.2018	1.37372	0.244976	5.6075	2.22e-08	1.92761	count	0.000718459
41835	UBE2L6	103	UBE2L6	OK	StudyFetal.Zhong.2018	2.673	0.46918	5.6972	1.33e-08	3.47822	count	0.000430654
61590	UBE2Q2P1	28	UBE2Q2P1	OK	StudyFetal.Zhong.2018	2.35454	0.278452	8.4558	4.12e-17	2.53522	count	1.34852e-12
41904	UBL5	966	UBL5	OK	StudyFetal.Zhong.2018	1.03887	0.163818	6.3416	2.59e-10	1.48104	count	8.41879e-06
41985	UCHL1	609	UCHL1	OK	StudyFetal.Zhong.2018	2.04868	0.210814	9.718	5.02e-22	2.89049	count	1.64631e-17
42012	UFC1	362	UFC1	OK	StudyFetal.Zhong.2018	1.57916	0.320521	4.9269	8.77e-07	2.16616	count	0.0281885
42033	UGDH	124	UGDH	OK	StudyFetal.Zhong.2018	2.86537	0.481862	5.9465	3.03e-09	3.75013	count	9.8275e-05
42036	UGDH-AS1	87	UGDH-AS1	OK	StudyFetal.Zhong.2018	3.0585	0.101483	30.138	3.03e-176	4.19542	count	9.96688e-172
42048	UGT8	2037	UGT8	OK	StudyFetal.Zhong.2018	-1.9072	0.299656	-6.3646	2.23e-10	-2.69178	count	7.24884e-06
42108	UNC5C	2346	UNC5C	OK	StudyFetal.Zhong.2018	-3.80455	0.770444	-4.9381	8.28e-07	-5.04137	count	0.0266185
42162	UQCR10	712	UQCR10	OK	StudyFetal.Zhong.2018	1.55961	0.219721	7.0982	1.54e-12	2.20286	count	5.02271e-08
42165	UQCR11	646	UQCR11	OK	StudyFetal.Zhong.2018	2.09672	0.207228	10.1179	1.03e-23	2.96181	count	3.3785e-19
42168	UQCRB	913	UQCRB	OK	StudyFetal.Zhong.2018	1.30174	0.222383	5.8536	5.29e-09	1.8359	count	0.000171507
42171	UQCRC1	350	UQCRC1	OK	StudyFetal.Zhong.2018	1.75155	0.268256	6.5294	7.63e-11	2.44178	count	2.48196e-06
42177	UQCRFS1	311	UQCRFS1	OK	StudyFetal.Zhong.2018	1.32762	0.245461	5.4087	6.81e-08	1.86061	count	0.00219983
42180	UQCRH	508	UQCRH	OK	StudyFetal.Zhong.2018	1.50725	0.215419	6.9968	3.16e-12	2.13031	count	1.03003e-07
42186	UQCRQ	729	UQCRQ	OK	StudyFetal.Zhong.2018	1.11778	0.184544	6.057	1.55e-09	1.58829	count	5.03037e-05
42369	USP54	1661	USP54	OK	StudyFetal.Zhong.2018	-2.48964	0.501405	-4.9653	7.21e-07	-3.43675	count	0.0231859
42522	VDAC1	306	VDAC1	OK	StudyFetal.Zhong.2018	1.80198	0.264949	6.8012	1.23e-11	2.51363	count	4.0066e-07
42528	VDAC2	432	VDAC2	OK	StudyFetal.Zhong.2018	1.67519	0.239176	7.004	3.01e-12	2.35448	count	9.812e-08
42531	VDAC3	384	VDAC3	OK	StudyFetal.Zhong.2018	1.44848	0.252869	5.7282	1.11e-08	2.03191	count	0.000359507
42564	VKORC1	100	VKORC1	OK	StudyFetal.Zhong.2018	1.1224	0.0852741	13.1623	1.37e-38	1.56776	count	4.50319e-34
42624	VPS29	337	VPS29	OK	StudyFetal.Zhong.2018	1.43138	0.266617	5.3687	8.49e-08	2.00756	count	0.00274117
42756	WAC-AS1	59	WAC-AS1	OK	StudyFetal.Zhong.2018	1.74841	0.199754	8.7528	3.28e-18	2.16724	count	1.0742e-13
42942	WDR54	66	WDR54	OK	StudyFetal.Zhong.2018	4.02852	0.827707	4.8671	1.19e-06	4.6333	count	0.0382276
42996	WDR83OS	333	WDR83OS	OK	StudyFetal.Zhong.2018	1.16608	0.210813	5.5313	3.43e-08	1.65225	count	0.0011093
43119	WWOX	2396	WWOX	OK	StudyFetal.Zhong.2018	-2.70079	0.412807	-6.5425	7e-11	-3.75992	count	2.27717e-06
43149	XIST	356	XIST	OK	StudyFetal.Zhong.2018	-1.89395	0.0790539	-23.9577	5.64e-117	-2.6874	count	1.855e-112
43209	XRCC6	470	XRCC6	OK	StudyFetal.Zhong.2018	1.18555	0.227873	5.2027	2.09e-07	1.67291	count	0.0067392
43272	YIF1A	379	YIF1A	OK	StudyFetal.Zhong.2018	1.75237	0.302987	5.7837	8e-09	2.42179	count	0.000259224
43374	YWHAZ	672	YWHAZ	OK	StudyFetal.Zhong.2018	1.0491	0.173825	6.0354	1.76e-09	1.49432	count	5.71138e-05
61914	ZAN	3	ZAN	OK	StudyFetal.Zhong.2018	2.76001	0.459324	6.0089	2.07e-09	1.99635	count	6.7157e-05
43464	ZBED5-AS1	16	ZBED5-AS1	OK	StudyFetal.Zhong.2018	1.6614	0.25196	6.5939	4.98e-11	1.89823	count	1.62054e-06
43497	ZBTB20	2714	ZBTB20	OK	StudyFetal.Zhong.2018	-0.539985	0.111791	-4.8303	1.43e-06	-0.773432	count	0.045913
43584	ZBTB8B	14	ZBTB8B	OK	StudyFetal.Zhong.2018	2.57769	0.315256	8.1765	4.14e-16	2.34756	count	1.35444e-11
43593	ZC2HC1A	326	ZC2HC1A	OK	StudyFetal.Zhong.2018	1.71697	0.333002	5.156	2.67e-07	2.35174	count	0.00860434
43650	ZCCHC17	400	ZCCHC17	OK	StudyFetal.Zhong.2018	2.40217	0.268078	8.9607	5.31e-19	3.34543	count	1.73972e-14
43746	ZEB2	2502	ZEB2	OK	StudyFetal.Zhong.2018	-1.10019	0.169522	-6.49	9.89e-11	-1.56942	count	3.21662e-06
44088	ZNF17	11	ZNF17	OK	StudyFetal.Zhong.2018	2.1314	0.280905	7.5876	4.23e-14	2.36429	count	1.38194e-09
44166	ZNF22	250	ZNF22	OK	StudyFetal.Zhong.2018	1.91629	0.353985	5.4135	6.63e-08	2.6184	count	0.00214176
44226	ZNF252P	14	ZNF252P	OK	StudyFetal.Zhong.2018	1.6614	0.324161	5.1252	3.14e-07	1.50677	count	0.0101146
44268	ZNF271P	103	ZNF271P	OK	StudyFetal.Zhong.2018	0.624154	0.0931086	6.7035	2.39e-11	0.86821	count	7.78112e-07
44310	ZNF286A	34	ZNF286A	OK	StudyFetal.Zhong.2018	1.25593	0.242436	5.1805	2.35e-07	1.33012	count	0.00757522
44331	ZNF300P1	33	ZNF300P1	OK	StudyFetal.Zhong.2018	1.94908	0.180975	10.7699	1.33e-26	2.37444	count	4.36479e-22
44688	ZNF528-AS1	37	ZNF528-AS1	OK	StudyFetal.Zhong.2018	3.04769	0.18779	16.2292	5.07e-57	3.61004	count	1.66712e-52
62031	ZNF564	14	ZNF564	OK	StudyFetal.Zhong.2018	4.05929	0.534329	7.597	3.94e-14	3.64405	count	1.28728e-09
44796	ZNF580	32	ZNF580	OK	StudyFetal.Zhong.2018	2.41517	0.17649	13.6845	1.72e-41	2.9677	count	5.65416e-37
62052	ZNF660	5	ZNF660	OK	StudyFetal.Zhong.2018	2.76001	0.436503	6.323	2.91e-10	1.99635	count	9.45837e-06
44961	ZNF667-AS1	66	ZNF667-AS1	OK	StudyFetal.Zhong.2018	1.87762	0.121353	15.4724	3.64e-52	2.55436	count	1.1968e-47
44979	ZNF674-AS1	15	ZNF674-AS1	OK	StudyFetal.Zhong.2018	2.17222	0.274881	7.9024	3.71e-15	2.12344	count	1.21298e-10
45198	ZNF793-AS1	31	ZNF793-AS1	OK	StudyFetal.Zhong.2018	0.968251	0.168769	5.7371	1.05e-08	1.20786	count	0.000340084
45240	ZNF827	388	ZNF827	OK	StudyFetal.Zhong.2018	1.29675	0.269076	4.8193	1.51e-06	1.81525	count	0.0484755
45390	ZSCAN16-AS1	46	ZSCAN16-AS1	OK	StudyFetal.Zhong.2018	2.54379	0.224751	11.3182	3.7e-29	3.29622	count	1.21482e-24
45435	ZSWIM7	249	ZSWIM7	OK	StudyFetal.Zhong.2018	3.04769	0.58181	5.2383	1.72e-07	3.85137	count	0.00554786

## Sheet: Study Adult Jäkel et al 
row.names	gene_short_name	num_cells_expressed	gene_id	status	term	estimate	std_err	test_val	p_value	normalized_effect	model_component	q_value			Genes with a significant time component in the adult time-point
34247	RPL7	1000	RPL7	OK	StudyAdult.Castelo	4.0505	0.617319	6.5614	6.18e-11	5.02339	count	1.99361e-06
9215	BAIAP2L2	657	BAIAP2L2	OK	StudyAdult.Castelo	3.60588	0.658768	5.4737	4.74e-08	4.39285	count	0.00151471
34460	RPS3A	785	RPS3A	OK	StudyAdult.Castelo	3.58099	0.590932	6.0599	1.52e-09	4.46275	count	4.883e-05
34049	RPL21	1318	RPL21	OK	StudyAdult.Castelo	3.51139	0.364353	9.6373	1.08e-21	4.69612	count	3.52814e-17
52433	CHRM5	483	CHRM5	OK	StudyAdult.Castelo	3.37879	0.683505	4.9433	8.07e-07	3.93137	count	0.0256174
42323	USP39	960	USP39	OK	StudyAdult.Castelo	2.67018	0.313258	8.5239	2.32e-17	3.60037	count	7.5581e-13
19199	GRID2	1214	GRID2	OK	StudyAdult.Castelo	2.63424	0.274042	9.6125	1.36e-21	3.63021	count	4.44258e-17
12110	CFTR	514	CFTR	OK	StudyAdult.Castelo	2.63315	0.444573	5.9229	3.49e-09	3.31867	count	0.000112015
34826	S100A1	955	S100A1	OK	StudyAdult.Castelo	2.47744	0.281264	8.8082	2.03e-18	3.37418	count	6.61841e-14
34424	RPS27	1558	RPS27	OK	StudyAdult.Castelo	2.45425	0.198098	12.3891	1.77e-34	3.42779	count	5.80401e-30
34415	RPS26	671	RPS26	OK	StudyAdult.Castelo	2.42389	0.380698	6.367	2.2e-10	3.174	count	7.08642e-06
44753	ZNF565	890	ZNF565	OK	StudyAdult.Castelo	2.27428	0.280572	8.1059	7.33e-16	3.09271	count	2.38394e-11
33767	RNMT	434	RNMT	OK	StudyAdult.Castelo	2.26316	0.439058	5.1546	2.69e-07	2.87532	count	0.00856281
58913	PWRN1	436	PWRN1	OK	StudyAdult.Castelo	2.17194	0.394794	5.5015	4.06e-08	2.82055	count	0.0012979
30422	PLEKHG1	394	PLEKHG1	OK	StudyAdult.Castelo	2.16785	0.416234	5.2083	2.02e-07	2.743	count	0.00643471
12890	COL18A1	472	COL18A1	OK	StudyAdult.Castelo	2.13203	0.376265	5.6663	1.59e-08	2.7648	count	0.000509229
41489	TUBB2B	647	TUBB2B	OK	StudyAdult.Castelo	2.1315	0.322578	6.6077	4.54e-11	2.82596	count	1.46497e-06
23858	LRRTM4	391	LRRTM4	OK	StudyAdult.Castelo	2.09916	0.420801	4.9885	6.4e-07	2.71894	count	0.0203245
45038	ZNF708	1100	ZNF708	OK	StudyAdult.Castelo	2.07812	0.212391	9.7844	2.65e-22	2.87709	count	8.6602e-18
34262	RPL9	1051	RPL9	OK	StudyAdult.Castelo	2.05552	0.227252	9.0451	2.51e-19	2.83542	count	8.18988e-15
5105	AFF3	445	AFF3	OK	StudyAdult.Castelo	2.04819	0.384675	5.3245	1.08e-07	2.62759	count	0.00344552
29357	PCSK1N	436	PCSK1N	OK	StudyAdult.Castelo	2.04795	0.415826	4.925	8.85e-07	2.60405	count	0.0280855
34244	RPL6	1040	RPL6	OK	StudyAdult.Castelo	2.04288	0.227314	8.987	4.21e-19	2.81743	count	1.37326e-14
11252	CCDC85B	394	CCDC85B	OK	StudyAdult.Castelo	1.99194	0.405846	4.9081	9.65e-07	2.54958	count	0.0306175
38261	STMN4	1383	STMN4	OK	StudyAdult.Castelo	1.85126	0.158195	11.7024	5.12e-31	2.60524	count	1.67777e-26
21437	JOSD2	620	JOSD2	OK	StudyAdult.Castelo	1.7698	0.267897	6.6063	4.59e-11	2.39181	count	1.48101e-06
34142	RPL3	1525	RPL3	OK	StudyAdult.Castelo	1.74907	0.142326	12.2891	5.78e-34	2.46475	count	1.89509e-29
23855	LRRTM3	1320	LRRTM3	OK	StudyAdult.Castelo	1.7364	0.156803	11.0738	5.28e-28	2.44106	count	1.72899e-23
1685	AC012593.1	841	AC012593.1	OK	StudyAdult.Castelo	1.67302	0.20912	8.0003	1.71e-15	2.31585	count	5.55938e-11
32537	RAD50	592	RAD50	OK	StudyAdult.Castelo	1.65084	0.268681	6.1442	9.01e-10	2.23465	count	2.89662e-05
34889	SAMD12	1390	SAMD12	OK	StudyAdult.Castelo	1.63401	0.138285	11.8163	1.4e-31	2.30488	count	4.58808e-27
33995	RPL13A	2014	RPL13A	OK	StudyAdult.Castelo	1.62264	0.102266	15.8668	1.14e-54	2.30767	count	3.74422e-50
22247	KNOP1	1113	KNOP1	OK	StudyAdult.Castelo	1.61526	0.171387	9.4247	7.92e-21	2.25827	count	2.58612e-16
38816	TANC2	983	TANC2	OK	StudyAdult.Castelo	1.60438	0.186849	8.5865	1.37e-17	2.23238	count	4.46387e-13
43598	ZC3H11A	596	ZC3H11A	OK	StudyAdult.Castelo	1.59808	0.26244	6.0893	1.27e-09	2.16923	count	4.08127e-05
34442	RPS28	1188	RPS28	OK	StudyAdult.Castelo	1.58818	0.164272	9.668	8.07e-22	2.22772	count	2.63663e-17
34850	S1PR5	380	S1PR5	OK	StudyAdult.Castelo	1.58171	0.326356	4.8466	1.31e-06	2.07933	count	0.0415152
32171	PUS7L	494	PUS7L	OK	StudyAdult.Castelo	1.57119	0.285759	5.4983	4.13e-08	2.10172	count	0.00132015
20039	HIVEP3	462	HIVEP3	OK	StudyAdult.Castelo	1.54771	0.30065	5.1479	2.79e-07	2.06271	count	0.00887973
17612	FKBP8	892	FKBP8	OK	StudyAdult.Castelo	1.5353	0.19598	7.834	6.35e-15	2.12962	count	2.06305e-10
37001	SMOC1	495	SMOC1	OK	StudyAdult.Castelo	1.52015	0.286174	5.312	1.16e-07	2.03622	count	0.00369994
21731	KCTD8	1178	KCTD8	OK	StudyAdult.Castelo	1.50785	0.154519	9.7584	3.41e-22	2.12216	count	1.11432e-17
22607	LGALS1	637	LGALS1	OK	StudyAdult.Castelo	1.49947	0.242227	6.1904	6.75e-10	2.05371	count	2.171e-05
24071	MACROD2	760	MACROD2	OK	StudyAdult.Castelo	1.48027	0.212114	6.9787	3.59e-12	2.04996	count	1.1614e-07
15236	DTNA	895	DTNA	OK	StudyAdult.Castelo	1.46489	0.183532	7.9817	1.98e-15	2.03838	count	6.43658e-11
19295	GSK3B	693	GSK3B	OK	StudyAdult.Castelo	1.45718	0.217199	6.709	2.3e-11	2.00602	count	7.42647e-07
21674	KCNQ1OT1	826	KCNQ1OT1	OK	StudyAdult.Castelo	1.44213	0.200597	7.1892	8.05e-13	1.99594	count	2.60748e-08
34325	RPS10	503	RPS10	OK	StudyAdult.Castelo	1.40849	0.280477	5.0217	5.4e-07	1.89055	count	0.0171563
44516	ZNF428	582	ZNF428	OK	StudyAdult.Castelo	1.40338	0.24716	5.678	1.48e-08	1.89985	count	0.000474074
23798	LRRC63	584	LRRC63	OK	StudyAdult.Castelo	1.39817	0.225075	6.212	5.89e-10	1.91104	count	1.89499e-05
11039	CCDC122	463	CCDC122	OK	StudyAdult.Castelo	1.37586	0.278508	4.9401	8.2e-07	1.84953	count	0.0260268
40400	TMSB4X	2261	TMSB4X	OK	StudyAdult.Castelo	1.37206	0.0792842	17.3056	2.92e-64	1.95915	count	9.59424e-60
34136	RPL29	1126	RPL29	OK	StudyAdult.Castelo	1.35924	0.157626	8.6232	1e-17	1.90834	count	3.2587e-13
22841	LINC00609	1653	LINC00609	OK	StudyAdult.Castelo	1.35693	0.112337	12.0791	6.79e-33	1.92772	count	2.22583e-28
39194	TECR	856	TECR	OK	StudyAdult.Castelo	1.35582	0.186505	7.2696	4.49e-13	1.88113	count	1.45503e-08
34538	RPSA	1127	RPSA	OK	StudyAdult.Castelo	1.35112	0.156136	8.6535	7.72e-18	1.89544	count	2.51587e-13
22556	LDLRAD3	566	LDLRAD3	OK	StudyAdult.Castelo	1.34435	0.238057	5.6472	1.77e-08	1.8354	count	0.000566719
10358	C4orf48	1744	C4orf48	OK	StudyAdult.Castelo	1.32941	0.104387	12.7354	2.71e-36	1.88933	count	8.8907e-32
36662	SLC5A11	1399	SLC5A11	OK	StudyAdult.Castelo	1.32279	0.120227	11.0024	1.13e-27	1.87249	count	3.70018e-23
9827	BTBD9	671	BTBD9	OK	StudyAdult.Castelo	1.30421	0.205606	6.3432	2.56e-10	1.79768	count	8.24499e-06
15551	EEF1A1	719	EEF1A1	OK	StudyAdult.Castelo	1.29452	0.210978	6.1358	9.49e-10	1.78567	count	3.05075e-05
33692	RNF217	443	RNF217	OK	StudyAdult.Castelo	1.2933	0.26126	4.9503	7.79e-07	1.74597	count	0.0247309
4805	ADAM10	957	ADAM10	OK	StudyAdult.Castelo	1.28848	0.164962	7.8108	7.6e-15	1.80196	count	2.46886e-10
13544	CSPP1	604	CSPP1	OK	StudyAdult.Castelo	1.285	0.220769	5.8206	6.43e-09	1.76524	count	0.000206184
7307	ANKRD36B	620	ANKRD36B	OK	StudyAdult.Castelo	1.26348	0.225142	5.6119	2.17e-08	1.731	count	0.000694595
14663	DLC1	1908	DLC1	OK	StudyAdult.Castelo	1.26188	0.0886884	14.2283	1.29e-44	1.79873	count	4.23546e-40
20678	IFI27L2	528	IFI27L2	OK	StudyAdult.Castelo	1.24712	0.245832	5.0731	4.13e-07	1.68802	count	0.0131322
34010	RPL14	899	RPL14	OK	StudyAdult.Castelo	1.24357	0.181208	6.8626	8.06e-12	1.73491	count	2.6062e-07
16340	ERCC6L2	531	ERCC6L2	OK	StudyAdult.Castelo	1.24018	0.232428	5.3358	1.02e-07	1.68928	count	0.00325502
21908	KIAA1328	516	KIAA1328	OK	StudyAdult.Castelo	1.23694	0.236004	5.2412	1.7e-07	1.68475	count	0.00541824
29459	PDE4D	988	PDE4D	OK	StudyAdult.Castelo	1.23465	0.158764	7.7766	9.92e-15	1.73227	count	3.22192e-10
33311	RGS7	448	RGS7	OK	StudyAdult.Castelo	1.23001	0.255322	4.8175	1.52e-06	1.66708	count	0.0481384
16865	FAM172A	1039	FAM172A	OK	StudyAdult.Castelo	1.22171	0.150566	8.1141	6.86e-16	1.71717	count	2.23121e-11
37034	SMYD3	569	SMYD3	OK	StudyAdult.Castelo	1.21887	0.223412	5.4557	5.24e-08	1.6722	count	0.00167408
39281	TESK2	693	TESK2	OK	StudyAdult.Castelo	1.21867	0.190861	6.3851	1.95e-10	1.68843	count	6.28192e-06
43697	ZDHHC14	922	ZDHHC14	OK	StudyAdult.Castelo	1.20547	0.159801	7.5436	5.9e-14	1.68766	count	1.91426e-09
7286	ANKRD26	560	ANKRD26	OK	StudyAdult.Castelo	1.20167	0.22195	5.4141	6.6e-08	1.6442	count	0.00210778
34367	RPS17	1221	RPS17	OK	StudyAdult.Castelo	1.20046	0.129932	9.2391	4.36e-20	1.69554	count	1.42328e-15
17594	FKBP2	1003	FKBP2	OK	StudyAdult.Castelo	1.18917	0.154246	7.7096	1.66e-14	1.66875	count	5.39019e-10
32744	RASGRF1	511	RASGRF1	OK	StudyAdult.Castelo	1.18673	0.228506	5.1934	2.19e-07	1.61907	count	0.00697493
7304	ANKRD36	998	ANKRD36	OK	StudyAdult.Castelo	1.17479	0.155218	7.5686	4.88e-14	1.64717	count	1.58366e-09
36695	SLC7A14	512	SLC7A14	OK	StudyAdult.Castelo	1.16634	0.231526	5.0376	4.97e-07	1.59264	count	0.0157947
22856	LINC00639	953	LINC00639	OK	StudyAdult.Castelo	1.16455	0.151656	7.6789	2.11e-14	1.63482	count	6.85054e-10
20336	HS3ST5	948	HS3ST5	OK	StudyAdult.Castelo	1.15981	0.155578	7.4549	1.15e-13	1.62808	count	3.72968e-09
44069	ZNF146	570	ZNF146	OK	StudyAdult.Castelo	1.14804	0.219416	5.2322	1.78e-07	1.57276	count	0.00567233
37610	SPATA6	815	SPATA6	OK	StudyAdult.Castelo	1.1476	0.173395	6.6184	4.23e-11	1.59634	count	1.36502e-06
20909	IMMP2L	854	IMMP2L	OK	StudyAdult.Castelo	1.14431	0.163891	6.9822	3.51e-12	1.60387	count	1.13563e-07
35105	SCFD2	523	SCFD2	OK	StudyAdult.Castelo	1.14375	0.228567	5.004	5.91e-07	1.55891	count	0.0187725
38132	STARD13	999	STARD13	OK	StudyAdult.Castelo	1.14193	0.145665	7.8394	6.08e-15	1.60729	count	1.97539e-10
8747	ATOX1	1038	ATOX1	OK	StudyAdult.Castelo	1.1407	0.148834	7.6643	2.36e-14	1.60039	count	7.66127e-10
4730	ACTN2	595	ACTN2	OK	StudyAdult.Castelo	1.129	0.207692	5.4359	5.85e-08	1.5526	count	0.00186855
18248	GAMT	656	GAMT	OK	StudyAdult.Castelo	1.12373	0.198724	5.6547	1.7e-08	1.54809	count	0.000544357
31460	PRKCA	813	PRKCA	OK	StudyAdult.Castelo	1.1221	0.171527	6.5418	7.03e-11	1.56518	count	2.26753e-06
28118	NSRP1	517	NSRP1	OK	StudyAdult.Castelo	1.11982	0.231264	4.8422	1.34e-06	1.52545	count	0.0424566
35750	SGCD	693	SGCD	OK	StudyAdult.Castelo	1.11513	0.187526	5.9466	3.03e-09	1.54859	count	9.72781e-05
5003	ADK	545	ADK	OK	StudyAdult.Castelo	1.11171	0.220653	5.0383	4.95e-07	1.52182	count	0.0157326
34268	RPLP0	756	RPLP0	OK	StudyAdult.Castelo	1.10639	0.185175	5.9749	2.55e-09	1.53221	count	8.18933e-05
15932	ELF1	659	ELF1	OK	StudyAdult.Castelo	1.10419	0.19013	5.8076	6.95e-09	1.53119	count	0.000222831
35774	SGMS1	1371	SGMS1	OK	StudyAdult.Castelo	1.10092	0.113974	9.6594	8.76e-22	1.55961	count	2.86198e-17
37028	SMURF1	780	SMURF1	OK	StudyAdult.Castelo	1.10001	0.171329	6.4205	1.56e-10	1.53315	count	5.02694e-06
28178	NTM	2461	NTM	OK	StudyAdult.Castelo	1.08651	0.0588434	18.4644	1.75e-72	1.55558	count	5.75068e-68
18425	GDAP1	534	GDAP1	OK	StudyAdult.Castelo	1.08394	0.221703	4.8891	1.06e-06	1.48462	count	0.0336168
23627	LPP	828	LPP	OK	StudyAdult.Castelo	1.07059	0.169578	6.3132	3.1e-10	1.49368	count	9.98107e-06
34370	RPS18	1453	RPS18	OK	StudyAdult.Castelo	1.07037	0.112211	9.5389	2.73e-21	1.51851	count	8.917e-17
35705	SFMBT2	535	SFMBT2	OK	StudyAdult.Castelo	1.06564	0.211369	5.0416	4.87e-07	1.46215	count	0.0154788
21482	KANSL1	1366	KANSL1	OK	StudyAdult.Castelo	1.06391	0.11488	9.261	3.57e-20	1.50855	count	1.16546e-15
8066	ARFGEF1	540	ARFGEF1	OK	StudyAdult.Castelo	1.05964	0.215445	4.9184	9.16e-07	1.44891	count	0.0290665
16433	ESF1	743	ESF1	OK	StudyAdult.Castelo	1.05844	0.181709	5.8249	6.27e-09	1.472	count	0.000201066
34352	RPS15	1869	RPS15	OK	StudyAdult.Castelo	1.05485	0.087033	12.1201	4.21e-33	1.5034	count	1.38016e-28
39860	TMEM117	569	TMEM117	OK	StudyAdult.Castelo	1.05399	0.203093	5.1897	2.24e-07	1.45139	count	0.0071335
25829	MRPL41	689	MRPL41	OK	StudyAdult.Castelo	1.05357	0.192516	5.4727	4.77e-08	1.45671	count	0.00152421
34088	RPL23A	1389	RPL23A	OK	StudyAdult.Castelo	1.05287	0.117332	8.9734	4.74e-19	1.49296	count	1.54609e-14
15011	DOCK3	1447	DOCK3	OK	StudyAdult.Castelo	1.04763	0.107183	9.7743	2.93e-22	1.48636	count	9.57495e-18
40562	TOMM20	574	TOMM20	OK	StudyAdult.Castelo	1.04589	0.212172	4.9294	8.66e-07	1.43293	count	0.0274834
34034	RPL18A	773	RPL18A	OK	StudyAdult.Castelo	1.04534	0.179336	5.8289	6.12e-09	1.45506	count	0.000196281
11270	CCDC91	640	CCDC91	OK	StudyAdult.Castelo	1.03848	0.191452	5.4242	6.25e-08	1.43437	count	0.00199619
24008	LYPLAL1	607	LYPLAL1	OK	StudyAdult.Castelo	1.03181	0.197499	5.2244	1.86e-07	1.4227	count	0.00592652
36554	SLC39A11	1312	SLC39A11	OK	StudyAdult.Castelo	1.02801	0.112472	9.1401	1.07e-19	1.4569	count	3.49205e-15
41105	TRPC1	542	TRPC1	OK	StudyAdult.Castelo	1.02546	0.210421	4.8734	1.15e-06	1.40585	count	0.0364585
35588	SERPINI1	1028	SERPINI1	OK	StudyAdult.Castelo	1.02223	0.138514	7.38	2e-13	1.43817	count	6.4846e-09
13460	CRYBG3	548	CRYBG3	OK	StudyAdult.Castelo	1.02085	0.202617	5.0383	4.95e-07	1.40223	count	0.0157326
33134	REV3L	751	REV3L	OK	StudyAdult.Castelo	1.02056	0.174901	5.8351	5.9e-09	1.42004	count	0.000189231
14999	DOCK1	1368	DOCK1	OK	StudyAdult.Castelo	1.02019	0.11165	9.1374	1.1e-19	1.44664	count	3.58985e-15
38813	TANC1	882	TANC1	OK	StudyAdult.Castelo	1.01672	0.153067	6.6423	3.6e-11	1.42626	count	1.1619e-06
39914	TMEM135	640	TMEM135	OK	StudyAdult.Castelo	1.01617	0.192095	5.2899	1.3e-07	1.40893	count	0.00414609
27290	NEGR1	1105	NEGR1	OK	StudyAdult.Castelo	1.01499	0.129269	7.8517	5.52e-15	1.43263	count	1.79361e-10
41129	TRPS1	877	TRPS1	OK	StudyAdult.Castelo	1.00989	0.152662	6.6152	4.32e-11	1.41611	count	1.39402e-06
38321	STRN3	600	STRN3	OK	StudyAdult.Castelo	1.00386	0.196218	5.116	3.3e-07	1.38343	count	0.0104999
40835	TRAPPC10	682	TRAPPC10	OK	StudyAdult.Castelo	1.00313	0.177434	5.6536	1.71e-08	1.39468	count	0.000547542
34376	RPS19	1646	RPS19	OK	StudyAdult.Castelo	1.00146	0.0984767	10.1695	6.15e-24	1.42506	count	2.01148e-19
8114	ARHGAP22	780	ARHGAP22	OK	StudyAdult.Castelo	1.00083	0.167574	5.9725	2.59e-09	1.39924	count	8.31701e-05
17276	FBXL17	713	FBXL17	OK	StudyAdult.Castelo	0.999638	0.17353	5.7606	9.16e-09	1.39123	count	0.000293551
32828	RBFOX1	886	RBFOX1	OK	StudyAdult.Castelo	0.995586	0.147689	6.7411	1.85e-11	1.40065	count	5.97457e-07
30272	PKN2	795	PKN2	OK	StudyAdult.Castelo	0.993769	0.166563	5.9663	2.69e-09	1.38691	count	8.63732e-05
32546	RAD51B	792	RAD51B	OK	StudyAdult.Castelo	0.988095	0.160423	6.1593	8.2e-10	1.38174	count	2.63655e-05
8639	ATE1	836	ATE1	OK	StudyAdult.Castelo	0.976705	0.172651	5.6571	1.67e-08	1.36561	count	0.000534801
19466	GUK1	1020	GUK1	OK	StudyAdult.Castelo	0.974437	0.140237	6.9485	4.44e-12	1.37024	count	1.43616e-07
13307	CRADD	769	CRADD	OK	StudyAdult.Castelo	0.969502	0.163222	5.9398	3.15e-09	1.35593	count	0.000101121
4979	ADGRL3	757	ADGRL3	OK	StudyAdult.Castelo	0.966818	0.170929	5.6562	1.68e-08	1.34938	count	0.00053797
39746	TMA7	942	TMA7	OK	StudyAdult.Castelo	0.953194	0.148805	6.4057	1.71e-10	1.33699	count	5.50945e-06
25100	MGAT5	1175	MGAT5	OK	StudyAdult.Castelo	0.952234	0.120382	7.9101	3.49e-15	1.34681	count	1.13422e-10
34259	RPL8	1325	RPL8	OK	StudyAdult.Castelo	0.950167	0.117394	8.0938	8.08e-16	1.34631	count	2.6277e-11
27014	NCOA7	1774	NCOA7	OK	StudyAdult.Castelo	0.948395	0.0847737	11.1874	1.55e-28	1.35221	count	5.07594e-24
38489	SUPT3H	673	SUPT3H	OK	StudyAdult.Castelo	0.947821	0.177515	5.3394	9.96e-08	1.31808	count	0.00317863
33233	RFX3	684	RFX3	OK	StudyAdult.Castelo	0.947821	0.177983	5.3253	1.08e-07	1.31808	count	0.00344552
12143	CHCHD3	632	CHCHD3	OK	StudyAdult.Castelo	0.946908	0.188756	5.0166	5.54e-07	1.3105	count	0.0175989
12560	CLOCK	652	CLOCK	OK	StudyAdult.Castelo	0.939903	0.184657	5.09	3.78e-07	1.30548	count	0.0120234
16310	ERBB4	2096	ERBB4	OK	StudyAdult.Castelo	0.939217	0.0701895	13.3812	8.57e-40	1.3435	count	2.81276e-35
17978	FTL	2771	FTL	OK	StudyAdult.Castelo	0.937305	0.0440708	21.2682	4.16e-94	1.34442	count	1.36777e-89
25391	MITF	782	MITF	OK	StudyAdult.Castelo	0.934714	0.160554	5.8218	6.39e-09	1.30718	count	0.000204908
20771	IGF1R	733	IGF1R	OK	StudyAdult.Castelo	0.934028	0.166672	5.604	2.27e-08	1.3052	count	0.000726468
42041	UGGT2	672	UGGT2	OK	StudyAdult.Castelo	0.934028	0.176583	5.2895	1.31e-07	1.29645	count	0.00417759
21629	KCNJ2	800	KCNJ2	OK	StudyAdult.Castelo	0.933366	0.157669	5.9198	3.56e-09	1.3067	count	0.000114258
14846	DNAJC1	721	DNAJC1	OK	StudyAdult.Castelo	0.93171	0.174436	5.3413	9.86e-08	1.29796	count	0.00314682
19010	GPHN	1865	GPHN	OK	StudyAdult.Castelo	0.93139	0.0809703	11.5029	4.81e-30	1.329	count	1.5758e-25
39008	TBCK	603	TBCK	OK	StudyAdult.Castelo	0.93115	0.191041	4.8741	1.15e-06	1.28653	count	0.0364585
34250	RPL7A	1317	RPL7A	OK	StudyAdult.Castelo	0.930779	0.113403	8.2077	3.21e-16	1.31813	count	1.04453e-11
24338	MAP3K7	963	MAP3K7	OK	StudyAdult.Castelo	0.926141	0.1384	6.6918	2.58e-11	1.30232	count	8.32953e-07
34109	RPL24	1247	RPL24	OK	StudyAdult.Castelo	0.92606	0.119208	7.7685	1.06e-14	1.31067	count	3.44267e-10
24566	MBD5	1166	MBD5	OK	StudyAdult.Castelo	0.920922	0.119137	7.73	1.42e-14	1.30238	count	4.61102e-10
11909	CEP170	1049	CEP170	OK	StudyAdult.Castelo	0.91743	0.134665	6.8127	1.14e-11	1.29268	count	3.68459e-07
26978	NCKAP5	2148	NCKAP5	OK	StudyAdult.Castelo	0.912114	0.0687721	13.2628	3.85e-39	1.30482	count	1.26342e-34
8348	ARMC8	682	ARMC8	OK	StudyAdult.Castelo	0.912049	0.176613	5.1641	2.56e-07	1.2683	count	0.0081495
16316	ERC1	599	ERC1	OK	StudyAdult.Castelo	0.911751	0.188673	4.8324	1.41e-06	1.25928	count	0.044666
9689	BRAF	759	BRAF	OK	StudyAdult.Castelo	0.910845	0.159606	5.7068	1.25e-08	1.27291	count	0.000400475
44072	ZNF148	664	ZNF148	OK	StudyAdult.Castelo	0.910177	0.180724	5.0363	5e-07	1.26359	count	0.015889
37628	SPATS2L	686	SPATS2L	OK	StudyAdult.Castelo	0.909577	0.174159	5.2227	1.87e-07	1.26481	count	0.00595801
13217	CPEB4	994	CPEB4	OK	StudyAdult.Castelo	0.909457	0.140828	6.4579	1.22e-10	1.27989	count	3.93279e-06
31976	PTMA	2545	PTMA	OK	StudyAdult.Castelo	0.9039	0.0542972	16.6473	8.69e-60	1.29519	count	2.85484e-55
17576	FIS1	1466	FIS1	OK	StudyAdult.Castelo	0.903547	0.100186	9.0187	3.17e-19	1.28284	count	1.03424e-14
36746	SLC9A9	1103	SLC9A9	OK	StudyAdult.Castelo	0.902626	0.125034	7.219	6.48e-13	1.27549	count	2.09952e-08
33770	RNPC3	830	RNPC3	OK	StudyAdult.Castelo	0.902529	0.160994	5.606	2.24e-08	1.26391	count	0.000716912
29882	PHF14	1048	PHF14	OK	StudyAdult.Castelo	0.895248	0.130455	6.8625	8.07e-12	1.26194	count	2.60935e-07
12860	COG5	695	COG5	OK	StudyAdult.Castelo	0.88905	0.168991	5.2609	1.53e-07	1.23775	count	0.00487733
34181	RPL36AL	728	RPL36AL	OK	StudyAdult.Castelo	0.888402	0.17427	5.0978	3.63e-07	1.23622	count	0.0115478
34412	RPS25	1248	RPS25	OK	StudyAdult.Castelo	0.883336	0.117093	7.5439	5.88e-14	1.2503	count	1.90788e-09
27029	NDE1	703	NDE1	OK	StudyAdult.Castelo	0.883124	0.168275	5.2481	1.63e-07	1.23111	count	0.00519579
19589	HAPLN2	1025	HAPLN2	OK	StudyAdult.Castelo	0.87895	0.126091	6.9708	3.8e-12	1.23928	count	1.2293e-07
24383	MAPK10	823	MAPK10	OK	StudyAdult.Castelo	0.875516	0.151899	5.7638	8.99e-09	1.22608	count	0.000288112
21905	KIAA1324L	1109	KIAA1324L	OK	StudyAdult.Castelo	0.875501	0.121885	7.183	8.41e-13	1.23786	count	2.72391e-08
16550	EXOC6B	1818	EXOC6B	OK	StudyAdult.Castelo	0.870749	0.0799093	10.8967	3.49e-27	1.24264	count	1.14259e-22
42695	VRK2	1359	VRK2	OK	StudyAdult.Castelo	0.86949	0.1023	8.4994	2.86e-17	1.2359	count	9.31616e-13
43664	ZCCHC7	929	ZCCHC7	OK	StudyAdult.Castelo	0.869417	0.139645	6.2259	5.4e-10	1.22302	count	1.73761e-05
23789	LRRC4C	687	LRRC4C	OK	StudyAdult.Castelo	0.868329	0.178513	4.8642	1.2e-06	1.21419	count	0.0380364
32597	RALGAPA1	1286	RALGAPA1	OK	StudyAdult.Castelo	0.864408	0.109866	7.8678	4.87e-15	1.22577	count	1.58251e-10
26075	MT2A	1282	MT2A	OK	StudyAdult.Castelo	0.863966	0.111521	7.7471	1.25e-14	1.22568	count	4.0595e-10
42167	UQCRB	913	UQCRB	OK	StudyAdult.Castelo	0.862054	0.14677	5.8735	4.7e-09	1.21036	count	0.000150785
36137	SLC13A3	796	SLC13A3	OK	StudyAdult.Castelo	0.857302	0.149702	5.7267	1.12e-08	1.19946	count	0.000358882
17996	FTX	1706	FTX	OK	StudyAdult.Castelo	0.853168	0.0838729	10.1722	5.99e-24	1.21625	count	1.95921e-19
15137	DPYD	2454	DPYD	OK	StudyAdult.Castelo	0.850646	0.0524221	16.2269	5.26e-57	1.21912	count	1.7278e-52
15029	DOHH	695	DOHH	OK	StudyAdult.Castelo	0.840938	0.165712	5.0747	4.1e-07	1.17157	count	0.0130372
25274	MIR181A1HG	1106	MIR181A1HG	OK	StudyAdult.Castelo	0.839861	0.118616	7.0805	1.75e-12	1.18834	count	5.6651e-08
35882	SH3TC2	1125	SH3TC2	OK	StudyAdult.Castelo	0.839523	0.123655	6.7893	1.33e-11	1.18819	count	4.29803e-07
34169	RPL35	1434	RPL35	OK	StudyAdult.Castelo	0.83698	0.10383	8.0611	1.05e-15	1.18944	count	3.41439e-11
12425	CLASP1	1000	CLASP1	OK	StudyAdult.Castelo	0.833944	0.131847	6.3251	2.88e-10	1.17506	count	9.27418e-06
10709	CAMKMT	739	CAMKMT	OK	StudyAdult.Castelo	0.832822	0.157219	5.2972	1.25e-07	1.16525	count	0.00398675
21950	KIF13B	1123	KIF13B	OK	StudyAdult.Castelo	0.829108	0.12468	6.6499	3.43e-11	1.17367	count	1.10707e-06
42593	VPS13B	782	VPS13B	OK	StudyAdult.Castelo	0.827087	0.153939	5.3728	8.3e-08	1.15714	count	0.00264986
19841	HERC4	740	HERC4	OK	StudyAdult.Castelo	0.82635	0.160431	5.1508	2.75e-07	1.15348	count	0.0087527
16541	EXOC4	1033	EXOC4	OK	StudyAdult.Castelo	0.824408	0.127901	6.4457	1.32e-10	1.16374	count	4.25476e-06
12959	COMMD1	689	COMMD1	OK	StudyAdult.Castelo	0.823921	0.168761	4.8822	1.1e-06	1.14649	count	0.0348799
21413	JMJD1C	1532	JMJD1C	OK	StudyAdult.Castelo	0.823704	0.0936865	8.7921	2.33e-18	1.17194	count	7.59557e-14
27176	NDUFB7	936	NDUFB7	OK	StudyAdult.Castelo	0.823165	0.139579	5.8975	4.07e-09	1.15619	count	0.00013061
17459	FER	795	FER	OK	StudyAdult.Castelo	0.822476	0.153472	5.3591	8.94e-08	1.15217	count	0.00285374
19790	HECW2	1293	HECW2	OK	StudyAdult.Castelo	0.819669	0.104722	7.8271	6.7e-15	1.16342	count	2.17656e-10
42842	WDPCP	845	WDPCP	OK	StudyAdult.Castelo	0.819365	0.142981	5.7306	1.09e-08	1.1511	count	0.00034928
29609	PEAK1	809	PEAK1	OK	StudyAdult.Castelo	0.818959	0.150648	5.4362	5.84e-08	1.14791	count	0.00186541
39770	TMCC1	853	TMCC1	OK	StudyAdult.Castelo	0.818929	0.145476	5.6293	1.96e-08	1.14822	count	0.000627435
34283	RPLP2	1901	RPLP2	OK	StudyAdult.Castelo	0.817939	0.0780729	10.4766	2.78e-25	1.16783	count	9.09616e-21
24581	MBNL1	1393	MBNL1	OK	StudyAdult.Castelo	0.817641	0.099695	8.2014	3.38e-16	1.1621	count	1.09975e-11
24455	MARCH1	2354	MARCH1	OK	StudyAdult.Castelo	0.81343	0.0594026	13.6935	1.53e-41	1.1652	count	5.02253e-37
32462	RABAC1	910	RABAC1	OK	StudyAdult.Castelo	0.813083	0.142987	5.6864	1.41e-08	1.14189	count	0.000451693
34175	RPL36	1241	RPL36	OK	StudyAdult.Castelo	0.812791	0.113056	7.1893	8.04e-13	1.15116	count	2.60432e-08
30362	PLCL1	2531	PLCL1	OK	StudyAdult.Castelo	0.812494	0.0496664	16.359	7.13e-58	1.16492	count	2.34213e-53
33980	RPL12	941	RPL12	OK	StudyAdult.Castelo	0.811472	0.140573	5.7726	8.54e-09	1.14134	count	0.000273733
35072	SCAPER	950	SCAPER	OK	StudyAdult.Castelo	0.810495	0.134521	6.0251	1.88e-09	1.141	count	6.03837e-05
11699	CDK6	779	CDK6	OK	StudyAdult.Castelo	0.808904	0.152111	5.3179	1.12e-07	1.13437	count	0.00357246
34133	RPL28	1861	RPL28	OK	StudyAdult.Castelo	0.807527	0.0792008	10.1959	4.73e-24	1.15263	count	1.54718e-19
7328	ANKRD44	856	ANKRD44	OK	StudyAdult.Castelo	0.803538	0.143774	5.5889	2.47e-08	1.12836	count	0.000790276
13691	CTTNBP2	1052	CTTNBP2	OK	StudyAdult.Castelo	0.801963	0.125695	6.3802	2.02e-10	1.13119	count	6.50703e-06
37976	SSBP2	1174	SSBP2	OK	StudyAdult.Castelo	0.799844	0.115382	6.9322	4.97e-12	1.13285	count	1.60735e-07
30374	PLD1	1166	PLD1	OK	StudyAdult.Castelo	0.798226	0.118319	6.7464	1.79e-11	1.13069	count	5.78134e-07
5339	AKAP6	2137	AKAP6	OK	StudyAdult.Castelo	0.797538	0.0662059	12.0463	9.94e-33	1.14081	count	3.25833e-28
39683	TLE4	1803	TLE4	OK	StudyAdult.Castelo	0.791875	0.0782666	10.1176	1.03e-23	1.13044	count	3.36841e-19
38759	TAF1D	731	TAF1D	OK	StudyAdult.Castelo	0.789094	0.158302	4.9847	6.53e-07	1.10262	count	0.0207354
4952	ADGRB3	2200	ADGRB3	OK	StudyAdult.Castelo	0.78328	0.0619719	12.6393	8.73e-36	1.12114	count	2.8637e-31
34277	RPLP1	1910	RPLP1	OK	StudyAdult.Castelo	0.782859	0.0777339	10.071	1.63e-23	1.11833	count	5.33026e-19
11711	CDKAL1	902	CDKAL1	OK	StudyAdult.Castelo	0.782384	0.13925	5.6185	2.09e-08	1.10059	count	0.00066903
15170	DRAP1	807	DRAP1	OK	StudyAdult.Castelo	0.781836	0.153319	5.0994	3.6e-07	1.09277	count	0.011453
17987	FTO	1126	FTO	OK	StudyAdult.Castelo	0.780958	0.119375	6.542	7.02e-11	1.1046	count	2.26437e-06
12182	CHD9	1267	CHD9	OK	StudyAdult.Castelo	0.780352	0.108567	7.1878	8.13e-13	1.10638	count	2.63331e-08
27236	NEAT1	2616	NEAT1	OK	StudyAdult.Castelo	0.779332	0.0488273	15.961	2.81e-55	1.1179	count	9.22944e-51
31175	PPP1R9A	887	PPP1R9A	OK	StudyAdult.Castelo	0.777649	0.138676	5.6077	2.22e-08	1.09309	count	0.000710533
31667	PRRG1	988	PRRG1	OK	StudyAdult.Castelo	0.776333	0.125578	6.1821	7.11e-10	1.09557	count	2.28658e-05
4784	ACYP2	1256	ACYP2	OK	StudyAdult.Castelo	0.770122	0.113038	6.813	1.13e-11	1.09282	count	3.65239e-07
28106	NSMCE2	1230	NSMCE2	OK	StudyAdult.Castelo	0.768636	0.108362	7.0932	1.6e-12	1.09059	count	5.18016e-08
22922	LINC00882	1006	LINC00882	OK	StudyAdult.Castelo	0.768617	0.124387	6.1793	7.24e-10	1.08571	count	2.32831e-05
43763	ZFAND3	1309	ZFAND3	OK	StudyAdult.Castelo	0.767362	0.102968	7.4524	1.17e-13	1.08931	count	3.79443e-09
17303	FBXL7	1543	FBXL7	OK	StudyAdult.Castelo	0.766771	0.0888816	8.6269	9.69e-18	1.09277	count	3.15778e-13
44921	ZNF638	2192	ZNF638	OK	StudyAdult.Castelo	0.759706	0.0649324	11.7	5.27e-31	1.08697	count	1.72687e-26
19196	GRID1	1384	GRID1	OK	StudyAdult.Castelo	0.759646	0.0970508	7.8273	6.68e-15	1.07971	count	2.17013e-10
13250	CPQ	722	CPQ	OK	StudyAdult.Castelo	0.757487	0.155502	4.8712	1.16e-06	1.06093	count	0.036772
5198	AGPAT4	1395	AGPAT4	OK	StudyAdult.Castelo	0.753557	0.0967861	7.7858	9.23e-15	1.07066	count	2.998e-10
24881	MEIS1	817	MEIS1	OK	StudyAdult.Castelo	0.75238	0.144258	5.2155	1.95e-07	1.05588	count	0.00621251
30287	PKP4	1828	PKP4	OK	StudyAdult.Castelo	0.750229	0.0754647	9.9415	5.81e-23	1.07137	count	1.89946e-18
29705	PEX5L	2548	PEX5L	OK	StudyAdult.Castelo	0.748678	0.0475573	15.7426	7.08e-54	1.07367	count	2.32521e-49
31097	PPP1R12B	1470	PPP1R12B	OK	StudyAdult.Castelo	0.746249	0.093659	7.9677	2.21e-15	1.06154	count	7.18405e-11
38975	TBC1D5	1600	TBC1D5	OK	StudyAdult.Castelo	0.742657	0.0863119	8.6043	1.17e-17	1.05815	count	3.81245e-13
16220	EPC1	860	EPC1	OK	StudyAdult.Castelo	0.737904	0.14008	5.2677	1.47e-07	1.03751	count	0.00468665
32681	RAPGEF2	874	RAPGEF2	OK	StudyAdult.Castelo	0.73764	0.1383	5.3336	1.03e-07	1.03664	count	0.00328683
29897	PHF21A	819	PHF21A	OK	StudyAdult.Castelo	0.734043	0.144083	5.0946	3.69e-07	1.02992	count	0.0117383
34529	RPS7	1026	RPS7	OK	StudyAdult.Castelo	0.733106	0.128471	5.7064	1.26e-08	1.03413	count	0.000403666
39017	TBL1XR1	1072	TBL1XR1	OK	StudyAdult.Castelo	0.732763	0.121165	6.0477	1.64e-09	1.03569	count	5.26817e-05
9515	BIRC6	1495	BIRC6	OK	StudyAdult.Castelo	0.730903	0.0921811	7.929	3.01e-15	1.04019	count	9.7831e-11
26747	NAALADL2	1078	NAALADL2	OK	StudyAdult.Castelo	0.72892	0.11512	6.3318	2.75e-10	1.03167	count	8.8561e-06
15014	DOCK4	2024	DOCK4	OK	StudyAdult.Castelo	0.728874	0.0677721	10.7548	1.56e-26	1.0423	count	5.10682e-22
14744	DMXL1	857	DMXL1	OK	StudyAdult.Castelo	0.728792	0.138203	5.2733	1.43e-07	1.02358	count	0.00455941
34349	RPS14	1490	RPS14	OK	StudyAdult.Castelo	0.725784	0.093728	7.7435	1.28e-14	1.03245	count	4.1568e-10
33845	ROBO1	1193	ROBO1	OK	StudyAdult.Castelo	0.725255	0.109579	6.6185	4.22e-11	1.02892	count	1.36184e-06
28916	PAN3	784	PAN3	OK	StudyAdult.Castelo	0.724088	0.149214	4.8527	1.28e-06	1.01403	count	0.0405658
7850	AP3B1	770	AP3B1	OK	StudyAdult.Castelo	0.723235	0.149874	4.8256	1.46e-06	1.01345	count	0.0462426
29300	PCGF5	1064	PCGF5	OK	StudyAdult.Castelo	0.721467	0.117371	6.1469	8.86e-10	1.02051	count	2.84849e-05
4562	ACACA	854	ACACA	OK	StudyAdult.Castelo	0.721411	0.140382	5.1389	2.93e-07	1.01364	count	0.00932443
19187	GRIA2	818	GRIA2	OK	StudyAdult.Castelo	0.717805	0.148373	4.8378	1.37e-06	1.00417	count	0.0434043
40514	TNRC6B	1650	TNRC6B	OK	StudyAdult.Castelo	0.71751	0.0843175	8.5096	2.62e-17	1.02283	count	8.53491e-13
34811	RYBP	1508	RYBP	OK	StudyAdult.Castelo	0.717328	0.0886169	8.0947	8.02e-16	1.02162	count	2.60826e-11
44870	ZNF609	822	ZNF609	OK	StudyAdult.Castelo	0.713607	0.140758	5.0697	4.21e-07	1.00307	count	0.0133857
9002	ATRX	1375	ATRX	OK	StudyAdult.Castelo	0.711342	0.098367	7.2315	5.92e-13	1.01057	count	1.91826e-08
8750	ATP10B	1302	ATP10B	OK	StudyAdult.Castelo	0.711281	0.101475	7.0094	2.9e-12	1.00986	count	9.38411e-08
24845	MEF2A	804	MEF2A	OK	StudyAdult.Castelo	0.709495	0.144577	4.9074	9.68e-07	0.995457	count	0.0307108
41798	UBE2E2	1730	UBE2E2	OK	StudyAdult.Castelo	0.709214	0.0788597	8.9934	3.98e-19	1.01209	count	1.29832e-14
24725	MDM4	985	MDM4	OK	StudyAdult.Castelo	0.708804	0.1268	5.59	2.46e-08	1.00032	count	0.000787102
18035	FUT8	1958	FUT8	OK	StudyAdult.Castelo	0.70685	0.0693488	10.1927	4.88e-24	1.01045	count	1.5962e-19
31709	PSD3	1588	PSD3	OK	StudyAdult.Castelo	0.704501	0.0858765	8.2036	3.32e-16	1.00385	count	1.08029e-11
21977	KIF21A	832	KIF21A	OK	StudyAdult.Castelo	0.703015	0.142853	4.9213	9.03e-07	0.986557	count	0.0286549
22223	KMT2C	1500	KMT2C	OK	StudyAdult.Castelo	0.699912	0.0915609	7.6442	2.75e-14	0.996289	count	8.92567e-10
29456	PDE4B	2874	PDE4B	OK	StudyAdult.Castelo	0.69748	0.036794	18.9564	4.19e-76	1.00154	count	1.37713e-71
13628	CTNNA3	2926	CTNNA3	OK	StudyAdult.Castelo	0.696037	0.0327518	21.2518	5.65e-94	1.00003	count	1.85761e-89
18215	GALNT13	917	GALNT13	OK	StudyAdult.Castelo	0.694355	0.129096	5.3786	8.04e-08	0.978913	count	0.00256701
23711	LRRC1	1205	LRRC1	OK	StudyAdult.Castelo	0.688783	0.104997	6.56	6.23e-11	0.977852	count	2.00967e-06
7265	ANKRD17	1200	ANKRD17	OK	StudyAdult.Castelo	0.684902	0.109258	6.2687	4.12e-10	0.971079	count	1.32615e-05
26633	MYO5A	1180	MYO5A	OK	StudyAdult.Castelo	0.68452	0.110062	6.2194	5.62e-10	0.970006	count	1.80824e-05
15887	EIF4G3	1502	EIF4G3	OK	StudyAdult.Castelo	0.684366	0.0894529	7.6506	2.62e-14	0.974433	count	8.50452e-10
34157	RPL32	1584	RPL32	OK	StudyAdult.Castelo	0.683939	0.0890171	7.6832	2.04e-14	0.974752	count	6.62368e-10
44318	ZNF292	1126	ZNF292	OK	StudyAdult.Castelo	0.681303	0.114123	5.9699	2.63e-09	0.964745	count	8.44493e-05
14675	DLEU2	1444	DLEU2	OK	StudyAdult.Castelo	0.680363	0.092072	7.3895	1.86e-13	0.968534	count	6.03086e-09
21386	JAKMIP2	986	JAKMIP2	OK	StudyAdult.Castelo	0.679963	0.123677	5.4979	4.14e-08	0.959835	count	0.00132331
26813	NALCN	1484	NALCN	OK	StudyAdult.Castelo	0.677623	0.0890617	7.6085	3.61e-14	0.964495	count	1.17155e-09
34841	S100B	2365	S100B	OK	StudyAdult.Castelo	0.677317	0.054457	12.4377	9.89e-35	0.970804	count	3.24333e-30
9926	C10orf90	1963	C10orf90	OK	StudyAdult.Castelo	0.6771	0.0675897	10.0178	2.75e-23	0.968143	count	8.9914e-19
20150	HMGN3	1092	HMGN3	OK	StudyAdult.Castelo	0.676391	0.117801	5.7418	1.02e-08	0.95567	count	0.000326869
14591	DICER1	1473	DICER1	OK	StudyAdult.Castelo	0.675822	0.0909841	7.4279	1.4e-13	0.961735	count	4.53964e-09
8603	ASTN2	975	ASTN2	OK	StudyAdult.Castelo	0.675333	0.124619	5.4192	6.42e-08	0.954167	count	0.00205042
36233	SLC25A13	1422	SLC25A13	OK	StudyAdult.Castelo	0.674091	0.0924956	7.2878	3.93e-13	0.959263	count	1.27375e-08
27635	NLK	1120	NLK	OK	StudyAdult.Castelo	0.670111	0.110336	6.0734	1.4e-09	0.949039	count	4.49834e-05
5216	AGTPBP1	1650	AGTPBP1	OK	StudyAdult.Castelo	0.667756	0.0814125	8.2021	3.36e-16	0.952608	count	1.09328e-11
13160	COX6B1	1060	COX6B1	OK	StudyAdult.Castelo	0.667134	0.121554	5.4884	4.37e-08	0.94222	count	0.00139674
21236	ITCH	1124	ITCH	OK	StudyAdult.Castelo	0.666239	0.111737	5.9625	2.75e-09	0.943411	count	8.82942e-05
35762	SGIP1	1043	SGIP1	OK	StudyAdult.Castelo	0.66523	0.119711	5.557	2.97e-08	0.939804	count	0.000950014
11612	CDH20	2199	CDH20	OK	StudyAdult.Castelo	0.662907	0.0584543	11.3406	2.9e-29	0.949468	count	9.49953e-25
14681	DLG1	2125	DLG1	OK	StudyAdult.Castelo	0.661694	0.0635418	10.4135	5.28e-25	0.947106	count	1.72746e-20
19346	GTDC1	1270	GTDC1	OK	StudyAdult.Castelo	0.657974	0.101824	6.4619	1.19e-10	0.935021	count	3.8362e-06
31136	PPP1R21	1212	PPP1R21	OK	StudyAdult.Castelo	0.657082	0.106102	6.1929	6.64e-10	0.932549	count	2.13569e-05
17534	FHIT	1927	FHIT	OK	StudyAdult.Castelo	0.656234	0.0680922	9.6374	1.08e-21	0.93846	count	3.52814e-17
38066	ST6GALNAC3	1344	ST6GALNAC3	OK	StudyAdult.Castelo	0.653155	0.0955968	6.8324	9.92e-12	0.929226	count	3.20694e-07
35849	SH3D19	1283	SH3D19	OK	StudyAdult.Castelo	0.652533	0.100036	6.523	7.96e-11	0.926878	count	2.56702e-06
38918	TBC1D12	1042	TBC1D12	OK	StudyAdult.Castelo	0.651847	0.115232	5.6568	1.67e-08	0.921464	count	0.000534801
37733	SPPL3	994	SPPL3	OK	StudyAdult.Castelo	0.650393	0.129619	5.0177	5.51e-07	0.918856	count	0.0175042
33992	RPL13	1792	RPL13	OK	StudyAdult.Castelo	0.649484	0.0772802	8.4043	6.34e-17	0.927073	count	2.06456e-12
32747	RASGRF2	1264	RASGRF2	OK	StudyAdult.Castelo	0.64916	0.0986686	6.5792	5.49e-11	0.921989	count	1.77113e-06
27857	NPAS3	2571	NPAS3	OK	StudyAdult.Castelo	0.649123	0.0462684	14.0295	1.84e-43	0.931141	count	6.0409e-39
33977	RPL11	1784	RPL11	OK	StudyAdult.Castelo	0.645948	0.0772762	8.3589	9.25e-17	0.92229	count	3.01143e-12
31058	PPM1H	973	PPM1H	OK	StudyAdult.Castelo	0.645546	0.121141	5.3289	1.06e-07	0.91224	count	0.00338204
32087	PTPRJ	869	PTPRJ	OK	StudyAdult.Castelo	0.643874	0.132649	4.854	1.27e-06	0.90692	count	0.0402527
8531	ASH1L	1209	ASH1L	OK	StudyAdult.Castelo	0.642613	0.104957	6.1226	1.03e-09	0.911389	count	3.31052e-05
14684	DLG2	3003	DLG2	OK	StudyAdult.Castelo	0.642292	0.0299936	21.4143	2.68e-95	0.922864	count	8.81211e-91
31994	PTN	901	PTN	OK	StudyAdult.Castelo	0.641503	0.132428	4.8442	1.33e-06	0.902629	count	0.042145
35984	SHROOM4	1122	SHROOM4	OK	StudyAdult.Castelo	0.641304	0.110034	5.8282	6.15e-09	0.908857	count	0.00019723
34508	RPS6KA5	1157	RPS6KA5	OK	StudyAdult.Castelo	0.636316	0.1069	5.9524	2.92e-09	0.902231	count	9.37495e-05
11546	CDC42BPA	1887	CDC42BPA	OK	StudyAdult.Castelo	0.634331	0.0702551	9.029	2.9e-19	0.906512	count	9.46183e-15
25367	MIR99AHG	1448	MIR99AHG	OK	StudyAdult.Castelo	0.633923	0.0878011	7.22	6.44e-13	0.902668	count	2.08662e-08
10916	CBFA2T2	1018	CBFA2T2	OK	StudyAdult.Castelo	0.63303	0.117859	5.3711	8.37e-08	0.894581	count	0.00267212
28703	OTUD7A	1677	OTUD7A	OK	StudyAdult.Castelo	0.632237	0.0773128	8.1776	4.1e-16	0.902235	count	1.33394e-11
34031	RPL18	1522	RPL18	OK	StudyAdult.Castelo	0.631894	0.089398	7.0683	1.91e-12	0.899768	count	6.18286e-08
38033	ST18	2869	ST18	OK	StudyAdult.Castelo	0.622544	0.0330437	18.8401	3.06e-75	0.894364	count	1.00567e-70
34124	RPL27A	1387	RPL27A	OK	StudyAdult.Castelo	0.621717	0.0967166	6.4282	1.48e-10	0.884204	count	4.7696e-06
40577	TOMM7	1007	TOMM7	OK	StudyAdult.Castelo	0.619535	0.122483	5.0581	4.47e-07	0.874454	count	0.0142097
24359	MAP4K5	1943	MAP4K5	OK	StudyAdult.Castelo	0.617303	0.0679342	9.0868	1.73e-19	0.882379	count	5.64534e-15
25397	MKLN1	1348	MKLN1	OK	StudyAdult.Castelo	0.615155	0.0954514	6.4447	1.33e-10	0.874523	count	4.28686e-06
12797	CNTNAP2	1203	CNTNAP2	OK	StudyAdult.Castelo	0.611204	0.106874	5.7189	1.17e-08	0.869373	count	0.00037488
42107	UNC5C	2346	UNC5C	OK	StudyAdult.Castelo	0.609418	0.0519563	11.7294	3.77e-31	0.873742	count	1.23543e-26
5237	AHI1	1209	AHI1	OK	StudyAdult.Castelo	0.605103	0.109594	5.5213	3.63e-08	0.85853	count	0.00116077
34388	RPS20	1198	RPS20	OK	StudyAdult.Castelo	0.604097	0.107976	5.5948	2.39e-08	0.856682	count	0.000764728
42350	USP47	1320	USP47	OK	StudyAdult.Castelo	0.602274	0.0970646	6.2049	6.16e-10	0.85588	count	1.98173e-05
12647	CMTM5	1195	CMTM5	OK	StudyAdult.Castelo	0.601795	0.102232	5.8866	4.34e-09	0.853317	count	0.000139249
42299	USP32	958	USP32	OK	StudyAdult.Castelo	0.601693	0.121071	4.9698	7.05e-07	0.849261	count	0.0223845
42425	UVRAG	993	UVRAG	OK	StudyAdult.Castelo	0.597864	0.118194	5.0583	4.46e-07	0.845097	count	0.0141783
27350	NENF	1371	NENF	OK	StudyAdult.Castelo	0.597823	0.0969604	6.1656	7.88e-10	0.850326	count	2.53381e-05
15530	EDF1	1161	EDF1	OK	StudyAdult.Castelo	0.596623	0.107978	5.5254	3.55e-08	0.844546	count	0.00113529
24143	MAGI2	2999	MAGI2	OK	StudyAdult.Castelo	0.594829	0.0301919	19.7016	9.89e-82	0.854804	count	3.25104e-77
38240	STK39	1120	STK39	OK	StudyAdult.Castelo	0.594434	0.107877	5.5103	3.86e-08	0.842302	count	0.00123412
7313	ANKRD36C	1060	ANKRD36C	OK	StudyAdult.Castelo	0.590428	0.110723	5.3325	1.03e-07	0.836031	count	0.00328683
45431	ZSWIM6	1915	ZSWIM6	OK	StudyAdult.Castelo	0.587084	0.0699184	8.3967	6.76e-17	0.839521	count	2.20119e-12
32369	RAB30	1071	RAB30	OK	StudyAdult.Castelo	0.586236	0.111372	5.2637	1.5e-07	0.829563	count	0.004782
43976	ZMYM2	1131	ZMYM2	OK	StudyAdult.Castelo	0.585693	0.108709	5.3877	7.64e-08	0.829765	count	0.00243945
11357	CCNY	1231	CCNY	OK	StudyAdult.Castelo	0.583615	0.10558	5.5277	3.5e-08	0.828723	count	0.0011194
43712	ZDHHC20	1693	ZDHHC20	OK	StudyAdult.Castelo	0.580354	0.0756659	7.67	2.26e-14	0.829023	count	7.33686e-10
5390	AKT3	1271	AKT3	OK	StudyAdult.Castelo	0.579792	0.0970655	5.9732	2.58e-09	0.823805	count	8.28515e-05
5351	AKAP9	1564	AKAP9	OK	StudyAdult.Castelo	0.571696	0.0883903	6.4679	1.14e-10	0.814659	count	3.67525e-06
23837	LRRFIP2	1051	LRRFIP2	OK	StudyAdult.Castelo	0.570159	0.112752	5.0567	4.5e-07	0.806901	count	0.0143046
34385	RPS2	1403	RPS2	OK	StudyAdult.Castelo	0.568437	0.0928234	6.1238	1.02e-09	0.80854	count	3.27848e-05
30797	POLR2I	1088	POLR2I	OK	StudyAdult.Castelo	0.567845	0.114063	4.9784	6.75e-07	0.803708	count	0.0214333
13514	CSNK1A1	1233	CSNK1A1	OK	StudyAdult.Castelo	0.565377	0.102645	5.5081	3.91e-08	0.802225	count	0.00125003
14612	DIP2C	1952	DIP2C	OK	StudyAdult.Castelo	0.562481	0.0662526	8.4899	3.09e-17	0.804404	count	1.00647e-12
44939	ZNF652	1529	ZNF652	OK	StudyAdult.Castelo	0.561815	0.0847633	6.628	3.97e-11	0.800615	count	1.2812e-06
21164	IQGAP1	1256	IQGAP1	OK	StudyAdult.Castelo	0.560687	0.0969145	5.7854	7.92e-09	0.796492	count	0.000253876
20108	HMGB1	1718	HMGB1	OK	StudyAdult.Castelo	0.557149	0.0771619	7.2205	6.42e-13	0.79498	count	2.08021e-08
23684	LRP1B	1030	LRP1B	OK	StudyAdult.Castelo	0.556927	0.114086	4.8816	1.1e-06	0.789253	count	0.0348799
31196	PPP2R2B	2756	PPP2R2B	OK	StudyAdult.Castelo	0.554915	0.038635	14.363	2.08e-45	0.796835	count	6.82968e-41
26537	MYCBP2	1032	MYCBP2	OK	StudyAdult.Castelo	0.554683	0.114792	4.8321	1.41e-06	0.784182	count	0.044666
20798	IGSF11	1007	IGSF11	OK	StudyAdult.Castelo	0.553585	0.114742	4.8246	1.47e-06	0.782622	count	0.0465564
34409	RPS24	1321	RPS24	OK	StudyAdult.Castelo	0.552895	0.0972928	5.6828	1.44e-08	0.785916	count	0.000461275
26996	NCOA1	1191	NCOA1	OK	StudyAdult.Castelo	0.551199	0.10346	5.3276	1.06e-07	0.782167	count	0.00338204
30023	PIEZO2	1301	PIEZO2	OK	StudyAdult.Castelo	0.54861	0.0930592	5.8953	4.12e-09	0.780394	count	0.000132211
34166	RPL34	1521	RPL34	OK	StudyAdult.Castelo	0.548444	0.0888507	6.1727	7.54e-10	0.781696	count	2.42456e-05
10631	CADM2	2220	CADM2	OK	StudyAdult.Castelo	0.547686	0.0562739	9.7325	4.36e-22	0.785414	count	1.42467e-17
32090	PTPRK	2486	PTPRK	OK	StudyAdult.Castelo	0.546667	0.0468074	11.6791	6.67e-31	0.784086	count	2.18556e-26
24134	MAGI1	1248	MAGI1	OK	StudyAdult.Castelo	0.546202	0.098719	5.5329	3.4e-08	0.775711	count	0.00108752
40481	TNKS	1167	TNKS	OK	StudyAdult.Castelo	0.544517	0.103544	5.2588	1.54e-07	0.77183	count	0.00490906
41939	UBR3	1130	UBR3	OK	StudyAdult.Castelo	0.542195	0.105133	5.1572	2.66e-07	0.768445	count	0.00846758
8222	ARID1B	1642	ARID1B	OK	StudyAdult.Castelo	0.541046	0.0800549	6.7584	1.65e-11	0.771909	count	5.33016e-07
15935	ELF2	1094	ELF2	OK	StudyAdult.Castelo	0.540868	0.107005	5.0546	4.55e-07	0.766942	count	0.0144631
33950	RPL10	1536	RPL10	OK	StudyAdult.Castelo	0.536693	0.0846589	6.3395	2.62e-10	0.764746	count	8.43797e-06
16130	ENOX1	1607	ENOX1	OK	StudyAdult.Castelo	0.533704	0.0786264	6.7878	1.35e-11	0.76196	count	4.36253e-07
18113	GAB2	1458	GAB2	OK	StudyAdult.Castelo	0.527558	0.0849582	6.2096	5.98e-10	0.75184	count	1.92389e-05
39656	TJP1	2112	TJP1	OK	StudyAdult.Castelo	0.525401	0.0592947	8.8608	1.28e-18	0.752159	count	4.1737e-14
37892	SRPK2	1688	SRPK2	OK	StudyAdult.Castelo	0.525011	0.0780093	6.7301	2e-11	0.749267	count	6.4584e-07
17792	FOXP1	1374	FOXP1	OK	StudyAdult.Castelo	0.524206	0.090617	5.7848	7.94e-09	0.746297	count	0.000254509
30698	POGZ	1315	POGZ	OK	StudyAdult.Castelo	0.522799	0.0946159	5.5255	3.54e-08	0.742985	count	0.00113213
42833	WDFY3	1341	WDFY3	OK	StudyAdult.Castelo	0.522371	0.0932758	5.6003	2.32e-08	0.743041	count	0.000742354
34187	RPL37A	1747	RPL37A	OK	StudyAdult.Castelo	0.520958	0.0743837	7.0037	3.02e-12	0.744147	count	9.77212e-08
37355	SNX29	1091	SNX29	OK	StudyAdult.Castelo	0.520547	0.106773	4.8752	1.14e-06	0.737399	count	0.0361426
27584	NKAIN2	2512	NKAIN2	OK	StudyAdult.Castelo	0.52047	0.046422	11.2117	1.19e-28	0.746908	count	3.89725e-24
15956	ELMO1	2569	ELMO1	OK	StudyAdult.Castelo	0.518282	0.0451967	11.4672	7.15e-30	0.743585	count	2.34234e-25
39095	TCF12	2252	TCF12	OK	StudyAdult.Castelo	0.51585	0.0550252	9.3748	1.26e-20	0.739056	count	4.11403e-16
25634	MPHOSPH8	1223	MPHOSPH8	OK	StudyAdult.Castelo	0.514726	0.0998495	5.155	2.69e-07	0.730599	count	0.00856281
39824	TMEFF2	1807	TMEFF2	OK	StudyAdult.Castelo	0.506938	0.0717495	7.0654	1.95e-12	0.724655	count	6.31176e-08
18110	GAB1	2211	GAB1	OK	StudyAdult.Castelo	0.506592	0.0549349	9.2217	5.11e-20	0.725759	count	1.66801e-15
28160	NT5DC1	1157	NT5DC1	OK	StudyAdult.Castelo	0.505573	0.100743	5.0184	5.49e-07	0.717496	count	0.0174412
7223	ANKIB1	1763	ANKIB1	OK	StudyAdult.Castelo	0.504855	0.0717083	7.0404	2.33e-12	0.721207	count	7.54105e-08
14969	DNM3	2649	DNM3	OK	StudyAdult.Castelo	0.503132	0.0420827	11.9558	2.83e-32	0.722155	count	9.27646e-28
17876	FRMD4B	2335	FRMD4B	OK	StudyAdult.Castelo	0.502668	0.0512287	9.8122	2.03e-22	0.720622	count	6.63445e-18
35858	SH3GL3	2129	SH3GL3	OK	StudyAdult.Castelo	0.500392	0.0613594	8.1551	4.92e-16	0.716649	count	1.60062e-11
23687	LRP2	1547	LRP2	OK	StudyAdult.Castelo	0.495397	0.0801055	6.1843	7.01e-10	0.706873	count	2.25456e-05
17879	FRMD5	2694	FRMD5	OK	StudyAdult.Castelo	0.493703	0.0393142	12.5579	2.34e-35	0.708756	count	7.6745e-31
18770	GNAQ	1630	GNAQ	OK	StudyAdult.Castelo	0.493121	0.0774115	6.3701	2.15e-10	0.703589	count	6.92558e-06
34427	RPS27A	1745	RPS27A	OK	StudyAdult.Castelo	0.492315	0.0745482	6.604	4.66e-11	0.703163	count	1.50346e-06
30008	PICALM	1919	PICALM	OK	StudyAdult.Castelo	0.491256	0.0657462	7.472	1.01e-13	0.702557	count	3.27583e-09
9317	BCAS3	1510	BCAS3	OK	StudyAdult.Castelo	0.490358	0.0828403	5.9193	3.57e-09	0.699322	count	0.000114572
15218	DST	2735	DST	OK	StudyAdult.Castelo	0.485444	0.0385722	12.5853	1.68e-35	0.696842	count	5.51023e-31
37988	SSH2	1602	SSH2	OK	StudyAdult.Castelo	0.484513	0.0773473	6.2641	4.24e-10	0.691592	count	1.36464e-05
37712	SPOCK3	2523	SPOCK3	OK	StudyAdult.Castelo	0.484004	0.0442397	10.9405	2.19e-27	0.694429	count	7.1705e-23
35378	SEC62	1675	SEC62	OK	StudyAdult.Castelo	0.480893	0.0746927	6.4383	1.39e-10	0.686361	count	4.47997e-06
33110	RERE	1920	RERE	OK	StudyAdult.Castelo	0.480445	0.066187	7.2589	4.86e-13	0.687033	count	1.57483e-08
43118	WWOX	2396	WWOX	OK	StudyAdult.Castelo	0.480205	0.0483139	9.9393	5.94e-23	0.688854	count	1.9419e-18
23870	LSAMP	1798	LSAMP	OK	StudyAdult.Castelo	0.479088	0.0702184	6.8228	1.06e-11	0.684984	count	3.42645e-07
7199	ANK2	2682	ANK2	OK	StudyAdult.Castelo	0.471309	0.0417123	11.2991	4.57e-29	0.676502	count	1.4969e-24
9260	BAZ2B	1759	BAZ2B	OK	StudyAdult.Castelo	0.471124	0.0725304	6.4955	9.53e-11	0.67296	count	3.07295e-06
8708	ATG4C	1398	ATG4C	OK	StudyAdult.Castelo	0.46925	0.0869388	5.3975	7.24e-08	0.66842	count	0.00231202
33221	RFTN2	1483	RFTN2	OK	StudyAdult.Castelo	0.467679	0.083316	5.6133	2.15e-08	0.666661	count	0.000688215
12257	CHN2	1663	CHN2	OK	StudyAdult.Castelo	0.465911	0.0742481	6.275	3.96e-10	0.665303	count	1.27468e-05
44294	ZNF280D	1292	ZNF280D	OK	StudyAdult.Castelo	0.463714	0.0928338	4.9951	6.19e-07	0.659308	count	0.0196582
7247	ANKRD12	1584	ANKRD12	OK	StudyAdult.Castelo	0.463225	0.0799545	5.7936	7.54e-09	0.660779	count	0.000241725
31910	PTBP2	1728	PTBP2	OK	StudyAdult.Castelo	0.46152	0.0731074	6.3129	3.11e-10	0.659129	count	1.0013e-05
41243	TSPAN5	1709	TSPAN5	OK	StudyAdult.Castelo	0.457434	0.0733261	6.2383	4.99e-10	0.653425	count	1.60583e-05
34046	RPL19	1760	RPL19	OK	StudyAdult.Castelo	0.457335	0.0723127	6.3244	2.89e-10	0.653325	count	9.30609e-06
16802	FAM13C	1392	FAM13C	OK	StudyAdult.Castelo	0.456962	0.085813	5.3251	1.08e-07	0.650664	count	0.00344552
33704	RNF220	2633	RNF220	OK	StudyAdult.Castelo	0.448542	0.0399176	11.2367	9.03e-29	0.643882	count	2.95751e-24
24368	MAP7	2677	MAP7	OK	StudyAdult.Castelo	0.440854	0.0425343	10.3647	8.67e-25	0.632917	count	2.83648e-20
27623	NLGN1	1315	NLGN1	OK	StudyAdult.Castelo	0.440318	0.0889735	4.9489	7.84e-07	0.628439	count	0.0248889
17681	FMNL2	2733	FMNL2	OK	StudyAdult.Castelo	0.439562	0.0370842	11.8531	9.22e-32	0.631213	count	3.02167e-27
10592	CACNA2D1	1539	CACNA2D1	OK	StudyAdult.Castelo	0.438987	0.0819574	5.3563	9.08e-08	0.626276	count	0.00289825
36014	SIK3	2549	SIK3	OK	StudyAdult.Castelo	0.431348	0.0425323	10.1417	8.11e-24	0.618994	count	2.65238e-19
38630	SYNJ2	1962	SYNJ2	OK	StudyAdult.Castelo	0.424821	0.059977	7.0831	1.72e-12	0.607997	count	5.56833e-08
21947	KIF13A	1464	KIF13A	OK	StudyAdult.Castelo	0.423888	0.0817224	5.1869	2.27e-07	0.604336	count	0.00722882
17228	FAU	1624	FAU	OK	StudyAdult.Castelo	0.423392	0.0777795	5.4435	5.61e-08	0.604186	count	0.00179217
9053	AUTS2	1967	AUTS2	OK	StudyAdult.Castelo	0.420803	0.0622617	6.7586	1.64e-11	0.60252	count	5.29802e-07
8030	ARAP2	2100	ARAP2	OK	StudyAdult.Castelo	0.413494	0.0567831	7.282	4.1e-13	0.592379	count	1.32877e-08
17909	FRYL	2535	FRYL	OK	StudyAdult.Castelo	0.4129	0.0458323	9.0089	3.46e-19	0.592434	count	1.12876e-14
13148	COX5B	1533	COX5B	OK	StudyAdult.Castelo	0.407503	0.0799305	5.0982	3.62e-07	0.581098	count	0.0115163
29135	PCDH9	3211	PCDH9	OK	StudyAdult.Castelo	0.402433	0.0202882	19.8358	9.19e-83	0.579119	count	3.02103e-78
26495	MVB12B	1738	MVB12B	OK	StudyAdult.Castelo	0.3997	0.0689977	5.7929	7.57e-09	0.57127	count	0.000242679
24356	MAP4K4	2409	MAP4K4	OK	StudyAdult.Castelo	0.396606	0.0469797	8.4421	4.63e-17	0.568772	count	1.50785e-12
11666	CDK19	1761	CDK19	OK	StudyAdult.Castelo	0.395698	0.0691435	5.7229	1.14e-08	0.565703	count	0.000365279
22175	KLHL32	1840	KLHL32	OK	StudyAdult.Castelo	0.390963	0.0659037	5.9323	3.3e-09	0.559315	count	0.000105927
29477	PDE8A	1858	PDE8A	OK	StudyAdult.Castelo	0.390557	0.0654597	5.9664	2.69e-09	0.558698	count	8.63732e-05
10496	C9orf3	1597	C9orf3	OK	StudyAdult.Castelo	0.387114	0.0770561	5.0238	5.34e-07	0.552723	count	0.0169668
14609	DIP2B	2017	DIP2B	OK	StudyAdult.Castelo	0.384088	0.0588079	6.5312	7.54e-11	0.549828	count	2.4318e-06
28958	PAQR8	1698	PAQR8	OK	StudyAdult.Castelo	0.380927	0.0697922	5.458	5.17e-08	0.544303	count	0.00165176
15002	DOCK10	2661	DOCK10	OK	StudyAdult.Castelo	0.377446	0.0393889	9.5825	1.81e-21	0.541886	count	5.91236e-17
32069	PTPRD	3007	PTPRD	OK	StudyAdult.Castelo	0.374173	0.029537	12.668	6.17e-36	0.537786	count	2.02407e-31
40409	TMTC2	2680	TMTC2	OK	StudyAdult.Castelo	0.369086	0.0380553	9.6987	6.03e-22	0.530113	count	1.9703e-17
27416	NFIA	1788	NFIA	OK	StudyAdult.Castelo	0.364431	0.0688924	5.2899	1.3e-07	0.521038	count	0.00414609
26936	NCAM2	2792	NCAM2	OK	StudyAdult.Castelo	0.352291	0.0359485	9.7999	2.29e-22	0.506119	count	7.48395e-18
5129	AGAP1	2404	AGAP1	OK	StudyAdult.Castelo	0.348544	0.0467731	7.4518	1.17e-13	0.499886	count	3.79443e-09
24221	MAN2A1	2726	MAN2A1	OK	StudyAdult.Castelo	0.347771	0.0366782	9.4817	4.66e-21	0.499601	count	1.52182e-16
36215	SLC24A2	2850	SLC24A2	OK	StudyAdult.Castelo	0.346731	0.032861	10.5515	1.29e-25	0.49819	count	4.22165e-21
14921	DNAJC6	2101	DNAJC6	OK	StudyAdult.Castelo	0.345386	0.0557237	6.1982	6.43e-10	0.494756	count	2.0684e-05
23954	LUC7L3	2183	LUC7L3	OK	StudyAdult.Castelo	0.343058	0.0534028	6.424	1.52e-10	0.491447	count	4.8982e-06
15017	DOCK5	2071	DOCK5	OK	StudyAdult.Castelo	0.337927	0.0548647	6.1593	8.2e-10	0.48408	count	2.63655e-05
19247	GRM3	2040	GRM3	OK	StudyAdult.Castelo	0.336364	0.0580525	5.7941	7.52e-09	0.481817	count	0.000241099
31691	PRUNE2	2310	PRUNE2	OK	StudyAdult.Castelo	0.335332	0.0484082	6.9272	5.15e-12	0.480864	count	1.66551e-07
39977	TMEM165	2401	TMEM165	OK	StudyAdult.Castelo	0.334019	0.0453368	7.3675	2.19e-13	0.479056	count	7.10042e-09
29945	PHLPP1	2630	PHLPP1	OK	StudyAdult.Castelo	0.326419	0.0406082	8.0382	1.26e-15	0.46866	count	4.09676e-11
6947	ALCAM	2342	ALCAM	OK	StudyAdult.Castelo	0.326002	0.0488011	6.6802	2.79e-11	0.467503	count	9.00668e-07
32690	RAPGEF5	2108	RAPGEF5	OK	StudyAdult.Castelo	0.317523	0.054474	5.8289	6.12e-09	0.454954	count	0.000196281
43496	ZBTB20	2714	ZBTB20	OK	StudyAdult.Castelo	0.310765	0.0370682	8.3836	7.54e-17	0.446243	count	2.45495e-12
36101	SLAIN1	2097	SLAIN1	OK	StudyAdult.Castelo	0.308435	0.0549597	5.612	2.17e-08	0.441777	count	0.000694595
37724	SPP1	2660	SPP1	OK	StudyAdult.Castelo	0.306785	0.0376195	8.155	4.93e-16	0.440591	count	1.60383e-11
43745	ZEB2	2502	ZEB2	OK	StudyAdult.Castelo	0.30133	0.0434361	6.9373	4.8e-12	0.432398	count	1.55242e-07
20861	IL1RAPL1	3104	IL1RAPL1	OK	StudyAdult.Castelo	0.289381	0.0233	12.4198	1.22e-34	0.416283	count	4.00062e-30
18263	GAPDH	2364	GAPDH	OK	StudyAdult.Castelo	0.288758	0.0458935	6.2919	3.55e-10	0.414141	count	1.14282e-05
28070	NRXN3	2206	NRXN3	OK	StudyAdult.Castelo	0.286036	0.0504896	5.6652	1.6e-08	0.410356	count	0.000512416
29447	PDE1C	2018	PDE1C	OK	StudyAdult.Castelo	0.276096	0.05557	4.9684	7.1e-07	0.395569	count	0.0225425
44702	ZNF536	2046	ZNF536	OK	StudyAdult.Castelo	0.268116	0.0546329	4.9076	9.67e-07	0.384121	count	0.03068
12428	CLASP2	2551	CLASP2	OK	StudyAdult.Castelo	0.26332	0.0408332	6.4487	1.29e-10	0.377905	count	4.15819e-06
41444	TTLL7	2648	TTLL7	OK	StudyAdult.Castelo	0.254969	0.0374941	6.8002	1.24e-11	0.366126	count	4.00756e-07
4715	ACTB	2489	ACTB	OK	StudyAdult.Castelo	0.246532	0.0418626	5.8891	4.28e-09	0.353756	count	0.000137332
35987	SHTN1	2732	SHTN1	OK	StudyAdult.Castelo	0.241739	0.0380141	6.3592	2.31e-10	0.347187	count	7.44051e-06
31946	PTGDS	3053	PTGDS	OK	StudyAdult.Castelo	0.181773	0.0270681	6.7154	2.2e-11	0.261461	count	7.1038e-07
32258	QKI	3101	QKI	OK	StudyAdult.Castelo	0.162835	0.0237327	6.8612	8.14e-12	0.234199	count	2.63182e-07
30164	PIP4K2A	3049	PIP4K2A	OK	StudyAdult.Castelo	0.158541	0.026782	5.9197	3.56e-09	0.227987	count	0.000114258
15533	EDIL3	2966	EDIL3	OK	StudyAdult.Castelo	0.14669	0.0279518	5.2479	1.64e-07	0.210885	count	0.0052275
7949	APLP1	2898	APLP1	OK	StudyAdult.Castelo	-0.13902	0.028473	-4.8825	1.1e-06	-0.199896	count	0.0348799
12749	CNP	2817	CNP	OK	StudyAdult.Castelo	-0.181995	0.0274297	-6.6349	3.79e-11	-0.261666	count	1.22315e-06
39326	TF	2618	TF	OK	StudyAdult.Castelo	-0.185677	0.0333425	-5.5688	2.77e-08	-0.266816	count	0.000886095
17951	FTH1	2772	FTH1	OK	StudyAdult.Castelo	-0.229742	0.0293462	-7.8287	6.61e-15	-0.330313	count	2.14746e-10
41495	TUBB4A	1902	TUBB4A	OK	StudyAdult.Castelo	-0.245855	0.0500746	-4.9098	9.57e-07	-0.35237	count	0.0303647
19541	H3F3B	2020	H3F3B	OK	StudyAdult.Castelo	-0.26474	0.048428	-5.4667	4.93e-08	-0.379591	count	0.00157518
33506	RNASE1	1885	RNASE1	OK	StudyAdult.Castelo	-0.269996	0.0531422	-5.0806	3.97e-07	-0.38711	count	0.0126262
12779	CNTN2	2223	CNTN2	OK	StudyAdult.Castelo	-0.270948	0.0443731	-6.1061	1.14e-09	-0.388905	count	3.66396e-05
11483	CD9	1733	CD9	OK	StudyAdult.Castelo	-0.285472	0.0567488	-5.0305	5.16e-07	-0.408859	count	0.0163959
37448	SORT1	2060	SORT1	OK	StudyAdult.Castelo	-0.290241	0.045829	-6.3331	2.73e-10	-0.41631	count	8.79197e-06
24113	MAG	2233	MAG	OK	StudyAdult.Castelo	-0.305394	0.0418506	-7.2972	3.67e-13	-0.438434	count	1.18952e-08
39755	TMBIM6	1684	TMBIM6	OK	StudyAdult.Castelo	-0.30607	0.057244	-5.3468	9.57e-08	-0.438021	count	0.00305436
24167	MAL	1929	MAL	OK	StudyAdult.Castelo	-0.323399	0.0505693	-6.3952	1.83e-10	-0.463801	count	5.89589e-06
20204	HNRNPDL	1443	HNRNPDL	OK	StudyAdult.Castelo	-0.346482	0.0650595	-5.3256	1.07e-07	-0.494919	count	0.00341373
30413	PLEKHB1	1787	PLEKHB1	OK	StudyAdult.Castelo	-0.350565	0.0520518	-6.7349	1.93e-11	-0.502144	count	6.23255e-07
19025	GPM6B	2776	GPM6B	OK	StudyAdult.Castelo	-0.359235	0.0278322	-12.9072	3.29e-37	-0.516477	count	1.07942e-32
43358	YWHAE	1394	YWHAE	OK	StudyAdult.Castelo	-0.369575	0.0659389	-5.6048	2.26e-08	-0.527749	count	0.00072329
18122	GABARAPL2	1193	GABARAPL2	OK	StudyAdult.Castelo	-0.379429	0.07474	-5.0767	4.06e-07	-0.540478	count	0.0129108
98	AATK	1436	AATK	OK	StudyAdult.Castelo	-0.386881	0.0621182	-6.2281	5.32e-10	-0.55322	count	1.71192e-05
35555	SERINC1	1245	SERINC1	OK	StudyAdult.Castelo	-0.39412	0.0716583	-5.5	4.09e-08	-0.561991	count	0.00130741
28538	OPALIN	947	OPALIN	OK	StudyAdult.Castelo	-0.403717	0.0817029	-4.9413	8.15e-07	-0.574941	count	0.0258689
15146	DPYSL2	2023	DPYSL2	OK	StudyAdult.Castelo	-0.404266	0.0453198	-8.9203	7.59e-19	-0.579782	count	2.47517e-14
12503	CLIC4	1171	CLIC4	OK	StudyAdult.Castelo	-0.411766	0.0736856	-5.5882	2.48e-08	-0.587123	count	0.000793451
4718	ACTG1	1492	ACTG1	OK	StudyAdult.Castelo	-0.418082	0.0600452	-6.9628	4.02e-12	-0.597573	count	1.30043e-07
16391	ERMN	1930	ERMN	OK	StudyAdult.Castelo	-0.418329	0.0481287	-8.6919	5.55e-18	-0.59995	count	1.8088e-13
12140	CHCHD2	1053	CHCHD2	OK	StudyAdult.Castelo	-0.421391	0.0811755	-5.1911	2.22e-07	-0.598916	count	0.00707026
40709	TPPP	1292	TPPP	OK	StudyAdult.Castelo	-0.423379	0.0669542	-6.3234	2.91e-10	-0.604951	count	9.3702e-06
29942	PHLDB1	1441	PHLDB1	OK	StudyAdult.Castelo	-0.427629	0.0629523	-6.7929	1.3e-11	-0.611349	count	4.20121e-07
24446	MAPT	1547	MAPT	OK	StudyAdult.Castelo	-0.428079	0.0587911	-7.2814	4.12e-13	-0.61247	count	1.33521e-08
7178	ANAPC5	1039	ANAPC5	OK	StudyAdult.Castelo	-0.431899	0.0816264	-5.2912	1.3e-07	-0.614452	count	0.00414609
10739	CANX	942	CANX	OK	StudyAdult.Castelo	-0.433917	0.0897508	-4.8347	1.4e-06	-0.61586	count	0.0443506
26582	MYL6	926	MYL6	OK	StudyAdult.Castelo	-0.440169	0.0908518	-4.8449	1.33e-06	-0.624089	count	0.042145
35387	SECISBP2L	1246	SECISBP2L	OK	StudyAdult.Castelo	-0.441413	0.0686407	-6.4308	1.45e-10	-0.629844	count	4.67306e-06
27392	NFASC	1371	NFASC	OK	StudyAdult.Castelo	-0.446217	0.0639331	-6.9794	3.57e-12	-0.637776	count	1.155e-07
40415	TMTC4	1050	TMTC4	OK	StudyAdult.Castelo	-0.467507	0.0787196	-5.9389	3.17e-09	-0.665697	count	0.000101757
30551	PLXNB1	802	PLXNB1	OK	StudyAdult.Castelo	-0.474575	0.0942639	-5.0345	5.05e-07	-0.672401	count	0.0160474
35009	SBDS	790	SBDS	OK	StudyAdult.Castelo	-0.478172	0.0972821	-4.9153	9.3e-07	-0.67627	count	0.0295089
40559	TOM1L2	935	TOM1L2	OK	StudyAdult.Castelo	-0.483038	0.084532	-5.7143	1.2e-08	-0.686654	count	0.000384468
25547	MOG	1300	MOG	OK	StudyAdult.Castelo	-0.486403	0.0662468	-7.3423	2.64e-13	-0.694521	count	8.55809e-09
34703	RTKN	875	RTKN	OK	StudyAdult.Castelo	-0.488189	0.0904683	-5.3962	7.29e-08	-0.6924	count	0.00232792
17747	FOLH1	1035	FOLH1	OK	StudyAdult.Castelo	-0.497608	0.0808597	-6.154	8.48e-10	-0.708505	count	2.7264e-05
35081	SCARB2	1548	SCARB2	OK	StudyAdult.Castelo	-0.497957	0.058335	-8.5362	2.1e-17	-0.712441	count	6.84159e-13
15650	EFHD1	1793	EFHD1	OK	StudyAdult.Castelo	-0.498978	0.0476652	-10.4684	3.02e-25	-0.7153	count	9.88114e-21
38669	SYT11	1443	SYT11	OK	StudyAdult.Castelo	-0.506852	0.0632338	-8.0155	1.51e-15	-0.724434	count	4.90931e-11
30431	PLEKHH1	1737	PLEKHH1	OK	StudyAdult.Castelo	-0.509347	0.0497037	-10.2476	2.82e-24	-0.729827	count	9.2245e-20
15926	ELAVL3	1337	ELAVL3	OK	StudyAdult.Castelo	-0.50977	0.0641958	-7.9409	2.74e-15	-0.728103	count	8.90582e-11
32447	RAB7A	873	RAB7A	OK	StudyAdult.Castelo	-0.520288	0.0928684	-5.6024	2.29e-08	-0.737622	count	0.0007328
13229	CPNE2	676	CPNE2	OK	StudyAdult.Castelo	-0.525409	0.102722	-5.1149	3.32e-07	-0.741267	count	0.0105632
33344	RHOA	1017	RHOA	OK	StudyAdult.Castelo	-0.528085	0.0811572	-6.5069	8.85e-11	-0.750709	count	2.85377e-06
37799	SQSTM1	832	SQSTM1	OK	StudyAdult.Castelo	-0.530079	0.0900367	-5.8874	4.32e-09	-0.750877	count	0.000138612
38477	SUN2	1494	SUN2	OK	StudyAdult.Castelo	-0.532769	0.0569853	-9.3492	1.59e-20	-0.762457	count	5.19119e-16
28835	PADI2	788	PADI2	OK	StudyAdult.Castelo	-0.533106	0.0924615	-5.7657	8.89e-09	-0.754995	count	0.000284916
33353	RHOBTB3	654	RHOBTB3	OK	StudyAdult.Castelo	-0.533184	0.106734	-4.9955	6.18e-07	-0.752381	count	0.0196277
29096	PCBP1	784	PCBP1	OK	StudyAdult.Castelo	-0.537074	0.0963345	-5.5751	2.68e-08	-0.759622	count	0.000857359
21464	JUND	980	JUND	OK	StudyAdult.Castelo	-0.541806	0.0799956	-6.773	1.49e-11	-0.771137	count	4.81449e-07
8039	ARF1	702	ARF1	OK	StudyAdult.Castelo	-0.54253	0.104817	-5.176	2.4e-07	-0.764808	count	0.0076416
18437	GDI1	1023	GDI1	OK	StudyAdult.Castelo	-0.544803	0.0805503	-6.7635	1.59e-11	-0.774435	count	5.13713e-07
15731	EID1	870	EID1	OK	StudyAdult.Castelo	-0.545785	0.0931344	-5.8602	5.08e-09	-0.773154	count	0.000162956
16205	EPB41L3	831	EPB41L3	OK	StudyAdult.Castelo	-0.546962	0.0887334	-6.1641	7.96e-10	-0.775006	count	2.55946e-05
39653	TJAP1	580	TJAP1	OK	StudyAdult.Castelo	-0.547253	0.111615	-4.903	9.9e-07	-0.76988	count	0.0314058
25181	MID1IP1	905	MID1IP1	OK	StudyAdult.Castelo	-0.549945	0.0847515	-6.4889	9.96e-11	-0.781874	count	3.2113e-06
34901	SAMD4B	726	SAMD4B	OK	StudyAdult.Castelo	-0.551073	0.0970423	-5.6787	1.48e-08	-0.779306	count	0.000474074
37241	SNRNP70	1043	SNRNP70	OK	StudyAdult.Castelo	-0.552042	0.0764857	-7.2176	6.55e-13	-0.786046	count	2.12213e-08
12941	COL9A2	654	COL9A2	OK	StudyAdult.Castelo	-0.5571	0.105338	-5.2887	1.31e-07	-0.784093	count	0.00417759
37937	SRSF2	645	SRSF2	OK	StudyAdult.Castelo	-0.56397	0.109001	-5.174	2.43e-07	-0.793121	count	0.00773688
22448	LARP1	640	LARP1	OK	StudyAdult.Castelo	-0.565634	0.111054	-5.0933	3.72e-07	-0.797312	count	0.0118333
9482	BHLHE41	531	BHLHE41	OK	StudyAdult.Castelo	-0.566004	0.116992	-4.838	1.37e-06	-0.793793	count	0.0434043
35717	SFSWAP	552	SFSWAP	OK	StudyAdult.Castelo	-0.568762	0.117755	-4.8301	1.43e-06	-0.798662	count	0.0452967
13832	CYB5R3	632	CYB5R3	OK	StudyAdult.Castelo	-0.568831	0.109134	-5.2122	1.98e-07	-0.799903	count	0.00630788
10823	CARNS1	1566	CARNS1	OK	StudyAdult.Castelo	-0.571125	0.0555313	-10.2847	1.94e-24	-0.817719	count	6.34632e-20
22100	KLF9	536	KLF9	OK	StudyAdult.Castelo	-0.575191	0.116376	-4.9425	8.1e-07	-0.807726	count	0.0257118
33374	RHOU	964	RHOU	OK	StudyAdult.Castelo	-0.57755	0.0787118	-7.3375	2.73e-13	-0.821302	count	8.84957e-09
20216	HNRNPH3	578	HNRNPH3	OK	StudyAdult.Castelo	-0.580576	0.118878	-4.8838	1.09e-06	-0.814768	count	0.0345661
43250	YBX1	626	YBX1	OK	StudyAdult.Castelo	-0.581086	0.112805	-5.1513	2.74e-07	-0.816998	count	0.00872115
39407	TGOLN2	645	TGOLN2	OK	StudyAdult.Castelo	-0.583353	0.108637	-5.3697	8.44e-08	-0.822189	count	0.00269439
43184	XPO6	594	XPO6	OK	StudyAdult.Castelo	-0.584938	0.111142	-5.263	1.51e-07	-0.822163	count	0.00481373
10661	CALM1	1991	CALM1	OK	StudyAdult.Castelo	-0.586124	0.0431256	-13.5911	5.78e-41	-0.840717	count	1.89734e-36
18023	FUS	709	FUS	OK	StudyAdult.Castelo	-0.586416	0.100748	-5.8206	6.43e-09	-0.826805	count	0.000206184
35864	SH3GLB2	504	SH3GLB2	OK	StudyAdult.Castelo	-0.586488	0.119885	-4.8921	1.05e-06	-0.822139	count	0.0333018
7904	APBB1	935	APBB1	OK	StudyAdult.Castelo	-0.587363	0.0844171	-6.9579	4.16e-12	-0.83401	count	1.34568e-07
35621	SET	578	SET	OK	StudyAdult.Castelo	-0.588161	0.119865	-4.9069	9.71e-07	-0.825783	count	0.030805
25700	MRFAP1	1158	MRFAP1	OK	StudyAdult.Castelo	-0.590322	0.0725512	-8.1366	5.72e-16	-0.841271	count	1.86066e-11
13556	CSRP1	1794	CSRP1	OK	StudyAdult.Castelo	-0.594077	0.0468006	-12.6938	4.51e-36	-0.851815	count	1.47955e-31
43370	YWHAQ	1342	YWHAQ	OK	StudyAdult.Castelo	-0.594695	0.064512	-9.2184	5.27e-20	-0.849383	count	1.72018e-15
27428	NFIX	1032	NFIX	OK	StudyAdult.Castelo	-0.596449	0.0795293	-7.4997	8.2e-14	-0.849118	count	2.65983e-09
31703	PSAT1	784	PSAT1	OK	StudyAdult.Castelo	-0.596516	0.0949461	-6.2827	3.77e-10	-0.843597	count	1.21356e-05
25427	MLF2	558	MLF2	OK	StudyAdult.Castelo	-0.599484	0.120007	-4.9954	6.18e-07	-0.83979	count	0.0196277
41618	TXNIP	1384	TXNIP	OK	StudyAdult.Castelo	-0.601746	0.0600784	-10.016	2.8e-23	-0.860678	count	9.1546e-19
20453	HSPA1B	1322	HSPA1B	OK	StudyAdult.Castelo	-0.605717	0.0616337	-9.8277	1.75e-22	-0.866459	count	5.7197e-18
27173	NDUFB6	535	NDUFB6	OK	StudyAdult.Castelo	-0.607554	0.123415	-4.9228	8.95e-07	-0.84826	count	0.0284019
18875	GOLGA7	1010	GOLGA7	OK	StudyAdult.Castelo	-0.615057	0.0782345	-7.8617	5.11e-15	-0.875661	count	1.66044e-10
10187	C1orf198	1007	C1orf198	OK	StudyAdult.Castelo	-0.616	0.0766265	-8.0393	1.25e-15	-0.876588	count	4.06438e-11
35486	SEMA6D	523	SEMA6D	OK	StudyAdult.Castelo	-0.616118	0.120405	-5.117	3.28e-07	-0.866465	count	0.0104366
39659	TJP2	679	TJP2	OK	StudyAdult.Castelo	-0.61675	0.0974614	-6.3282	2.82e-10	-0.87169	count	9.08125e-06
20804	IGSF8	1058	IGSF8	OK	StudyAdult.Castelo	-0.619707	0.0750675	-8.2553	2.17e-16	-0.882502	count	7.0627e-12
19184	GRHPR	555	GRHPR	OK	StudyAdult.Castelo	-0.623304	0.116454	-5.3524	9.28e-08	-0.873781	count	0.00296199
16613	EZH1	519	EZH1	OK	StudyAdult.Castelo	-0.623893	0.119345	-5.2276	1.83e-07	-0.874332	count	0.0058313
28865	PAIP2	780	PAIP2	OK	StudyAdult.Castelo	-0.628282	0.0943652	-6.658	3.24e-11	-0.888602	count	1.04584e-06
13673	CTSF	622	CTSF	OK	StudyAdult.Castelo	-0.632016	0.10586	-5.9703	2.62e-09	-0.890763	count	8.41308e-05
41648	TYRO3	652	TYRO3	OK	StudyAdult.Castelo	-0.632059	0.103023	-6.1352	9.53e-10	-0.891171	count	3.06342e-05
35315	SEC14L5	533	SEC14L5	OK	StudyAdult.Castelo	-0.636264	0.112806	-5.6403	1.84e-08	-0.893175	count	0.000589113
11552	CDC42EP1	888	CDC42EP1	OK	StudyAdult.Castelo	-0.637032	0.0854769	-7.4527	1.17e-13	-0.904969	count	3.79443e-09
18758	GNAI2	809	GNAI2	OK	StudyAdult.Castelo	-0.63753	0.0900266	-7.0816	1.74e-12	-0.902861	count	5.6329e-08
15725	EI24	451	EI24	OK	StudyAdult.Castelo	-0.639729	0.131001	-4.8834	1.09e-06	-0.891361	count	0.0345661
227	ABHD17B	723	ABHD17B	OK	StudyAdult.Castelo	-0.639803	0.0942562	-6.7879	1.35e-11	-0.905291	count	4.36253e-07
20435	HSP90B1	670	HSP90B1	OK	StudyAdult.Castelo	-0.641898	0.104663	-6.133	9.66e-10	-0.905017	count	3.10511e-05
32807	RBBP6	490	RBBP6	OK	StudyAdult.Castelo	-0.642023	0.122438	-5.2437	1.67e-07	-0.898618	count	0.00532296
40193	TMEM259	484	TMEM259	OK	StudyAdult.Castelo	-0.645697	0.12422	-5.198	2.14e-07	-0.902936	count	0.00681633
10700	CAMK2N1	1554	CAMK2N1	OK	StudyAdult.Castelo	-0.64609	0.0542057	-11.9192	4.32e-32	-0.924952	count	1.41592e-27
35708	SFPQ	701	SFPQ	OK	StudyAdult.Castelo	-0.646296	0.10067	-6.4199	1.56e-10	-0.912323	count	5.02694e-06
31625	PRR18	691	PRR18	OK	StudyAdult.Castelo	-0.647501	0.0967024	-6.6958	2.52e-11	-0.914977	count	8.13607e-07
30662	PNRC1	554	PNRC1	OK	StudyAdult.Castelo	-0.648521	0.113453	-5.7162	1.19e-08	-0.911732	count	0.000381276
15413	DYSF	694	DYSF	OK	StudyAdult.Castelo	-0.651395	0.0960474	-6.782	1.4e-11	-0.923702	count	4.52382e-07
42725	VWA1	1051	VWA1	OK	StudyAdult.Castelo	-0.651879	0.0762589	-8.5482	1.89e-17	-0.929095	count	6.15762e-13
11477	CD81	1006	CD81	OK	StudyAdult.Castelo	-0.66141	0.0781958	-8.4584	4.03e-17	-0.940982	count	1.31257e-12
30425	PLEKHG3	784	PLEKHG3	OK	StudyAdult.Castelo	-0.66333	0.088921	-7.4598	1.11e-13	-0.94052	count	3.60006e-09
21941	KIDINS220	1029	KIDINS220	OK	StudyAdult.Castelo	-0.663908	0.0790409	-8.3995	6.6e-17	-0.944994	count	2.14916e-12
40523	TNS1	514	TNS1	OK	StudyAdult.Castelo	-0.666193	0.117155	-5.6864	1.41e-08	-0.932076	count	0.000451693
12944	COL9A3	564	COL9A3	OK	StudyAdult.Castelo	-0.666743	0.110031	-6.0596	1.52e-09	-0.937664	count	4.883e-05
13604	CTDSP2	451	CTDSP2	OK	StudyAdult.Castelo	-0.667095	0.128004	-5.2115	1.99e-07	-0.932185	count	0.00633954
9107	B3GAT1	1060	B3GAT1	OK	StudyAdult.Castelo	-0.66745	0.0738127	-9.0425	2.57e-19	-0.950543	count	8.3854e-15
8441	ARRDC3	520	ARRDC3	OK	StudyAdult.Castelo	-0.66793	0.118568	-5.6333	1.92e-08	-0.935243	count	0.00061465
38102	STAG2	547	STAG2	OK	StudyAdult.Castelo	-0.669728	0.115623	-5.7923	7.6e-09	-0.939151	count	0.000243633
30635	PNN	493	PNN	OK	StudyAdult.Castelo	-0.676049	0.124245	-5.4412	5.68e-08	-0.944721	count	0.00181442
12665	CNBP	690	CNBP	OK	StudyAdult.Castelo	-0.677558	0.101261	-6.6912	2.6e-11	-0.95439	count	8.39384e-07
27185	NDUFB9	513	NDUFB9	OK	StudyAdult.Castelo	-0.678174	0.123714	-5.4818	4.53e-08	-0.945261	count	0.00144779
11342	CCNL1	461	CCNL1	OK	StudyAdult.Castelo	-0.678783	0.129449	-5.2436	1.67e-07	-0.946875	count	0.00532296
18773	GNAS	974	GNAS	OK	StudyAdult.Castelo	-0.6793	0.0809271	-8.394	6.91e-17	-0.965357	count	2.24997e-12
32933	RBM5	580	RBM5	OK	StudyAdult.Castelo	-0.684163	0.112331	-6.0906	1.26e-09	-0.960372	count	4.04926e-05
26924	NBR1	512	NBR1	OK	StudyAdult.Castelo	-0.69311	0.118262	-5.8608	5.07e-09	-0.970861	count	0.000162641
43286	YIPF4	527	YIPF4	OK	StudyAdult.Castelo	-0.697075	0.114879	-6.0679	1.44e-09	-0.977365	count	4.62658e-05
10883	CAT	389	CAT	OK	StudyAdult.Castelo	-0.70464	0.140733	-5.0069	5.82e-07	-0.975218	count	0.0184878
197	ABHD12	557	ABHD12	OK	StudyAdult.Castelo	-0.704996	0.116309	-6.0614	1.5e-09	-0.989039	count	4.8189e-05
7952	APLP2	454	APLP2	OK	StudyAdult.Castelo	-0.705346	0.135766	-5.1953	2.17e-07	-0.982839	count	0.00691145
4733	ACTN4	871	ACTN4	OK	StudyAdult.Castelo	-0.709311	0.0817192	-8.6799	6.15e-18	-1.00788	count	2.00429e-13
37505	SOX8	979	SOX8	OK	StudyAdult.Castelo	-0.709415	0.0783381	-9.0558	2.28e-19	-1.01033	count	7.43964e-15
9092	B2M	964	B2M	OK	StudyAdult.Castelo	-0.71389	0.0809148	-8.8227	1.79e-18	-1.01493	count	5.8363e-14
25673	MPRIP	446	MPRIP	OK	StudyAdult.Castelo	-0.715761	0.126226	-5.6705	1.55e-08	-1.00006	count	0.000496434
22325	KRTCAP2	532	KRTCAP2	OK	StudyAdult.Castelo	-0.718361	0.122106	-5.8831	4.43e-09	-1.00502	count	0.000142132
20210	HNRNPH1	623	HNRNPH1	OK	StudyAdult.Castelo	-0.719715	0.10647	-6.7598	1.63e-11	-1.01402	count	5.26604e-07
31898	PSRC1	698	PSRC1	OK	StudyAdult.Castelo	-0.721796	0.0943959	-7.6465	2.7e-14	-1.02003	count	8.76393e-10
39131	TCP1	400	TCP1	OK	StudyAdult.Castelo	-0.723622	0.139894	-5.1727	2.45e-07	-1.00363	count	0.00780031
16667	FADS1	630	FADS1	OK	StudyAdult.Castelo	-0.723688	0.105685	-6.8476	8.94e-12	-1.01986	count	2.8903e-07
28514	OLIG2	678	OLIG2	OK	StudyAdult.Castelo	-0.72451	0.101423	-7.1434	1.12e-12	-1.02321	count	3.62701e-08
13538	CSNK2B	424	CSNK2B	OK	StudyAdult.Castelo	-0.72716	0.136335	-5.3336	1.03e-07	-1.00764	count	0.00328683
33740	RNF5	361	RNF5	OK	StudyAdult.Castelo	-0.729995	0.138552	-5.2687	1.46e-07	-1.01034	count	0.00465492
32003	PTP4A1	415	PTP4A1	OK	StudyAdult.Castelo	-0.73047	0.139416	-5.2395	1.71e-07	-1.01186	count	0.00544994
31772	PSMB4	499	PSMB4	OK	StudyAdult.Castelo	-0.739283	0.12335	-5.9934	2.28e-09	-1.03053	count	7.3229e-05
21809	KEAP1	386	KEAP1	OK	StudyAdult.Castelo	-0.743321	0.140931	-5.2744	1.42e-07	-1.03024	count	0.00452767
30929	POU3F3	583	POU3F3	OK	StudyAdult.Castelo	-0.746946	0.111353	-6.7079	2.32e-11	-1.0518	count	7.49082e-07
16517	EWSR1	443	EWSR1	OK	StudyAdult.Castelo	-0.747087	0.132441	-5.6409	1.84e-08	-1.03753	count	0.000589113
4646	ACO2	437	ACO2	OK	StudyAdult.Castelo	-0.747299	0.122632	-6.0939	1.23e-09	-1.04354	count	3.95297e-05
36326	SLC25A5	394	SLC25A5	OK	StudyAdult.Castelo	-0.748247	0.143902	-5.1997	2.12e-07	-1.02959	count	0.00675284
43352	YWHAB	1080	YWHAB	OK	StudyAdult.Castelo	-0.750792	0.0713474	-10.523	1.72e-25	-1.06897	count	5.62818e-21
42278	USP22	568	USP22	OK	StudyAdult.Castelo	-0.753821	0.112389	-6.7073	2.33e-11	-1.05746	count	7.52287e-07
9563	BMI1	308	BMI1	OK	StudyAdult.Castelo	-0.757144	0.148888	-5.0853	3.88e-07	-1.04351	count	0.0123407
33200	RFFL	479	RFFL	OK	StudyAdult.Castelo	-0.760781	0.11514	-6.6075	4.55e-11	-1.06652	count	1.46815e-06
4886	ADAR	409	ADAR	OK	StudyAdult.Castelo	-0.762223	0.135263	-5.6351	1.9e-08	-1.05874	count	0.000608266
11345	CCNL2	558	CCNL2	OK	StudyAdult.Castelo	-0.762718	0.112829	-6.7599	1.63e-11	-1.06935	count	5.26604e-07
8798	ATP2A2	515	ATP2A2	OK	StudyAdult.Castelo	-0.763034	0.118542	-6.4368	1.4e-10	-1.06888	count	4.51206e-06
38558	SVIP	371	SVIP	OK	StudyAdult.Castelo	-0.76433	0.138642	-5.513	3.8e-08	-1.05887	count	0.00121501
35975	SHROOM1	355	SHROOM1	OK	StudyAdult.Castelo	-0.764444	0.144097	-5.305	1.2e-07	-1.06099	count	0.0038274
34757	RUFY3	953	RUFY3	OK	StudyAdult.Castelo	-0.76676	0.077434	-9.9021	8.52e-23	-1.09026	count	2.78502e-18
20186	HNRNPA2B1	1224	HNRNPA2B1	OK	StudyAdult.Castelo	-0.767392	0.0643699	-11.9216	4.2e-32	-1.09529	count	1.37663e-27
29102	PCBP2	756	PCBP2	OK	StudyAdult.Castelo	-0.770809	0.09149	-8.4251	5.33e-17	-1.09124	count	1.73577e-12
13634	CTNNB1	340	CTNNB1	OK	StudyAdult.Castelo	-0.770942	0.155203	-4.9673	7.14e-07	-1.06178	count	0.0226688
20201	HNRNPD	650	HNRNPD	OK	StudyAdult.Castelo	-0.776205	0.103068	-7.531	6.48e-14	-1.09462	count	2.10231e-09
10196	C1orf43	669	C1orf43	OK	StudyAdult.Castelo	-0.777689	0.101236	-7.6819	2.06e-14	-1.09752	count	6.68841e-10
15749	EIF1AX	694	EIF1AX	OK	StudyAdult.Castelo	-0.779141	0.0978071	-7.9661	2.24e-15	-1.09928	count	7.28134e-11
13577	CTBP1	354	CTBP1	OK	StudyAdult.Castelo	-0.78077	0.149449	-5.2243	1.86e-07	-1.07505	count	0.00592652
6983	ALDH6A1	551	ALDH6A1	OK	StudyAdult.Castelo	-0.784264	0.115046	-6.817	1.1e-11	-1.10186	count	3.55553e-07
21965	KIF1BP	278	KIF1BP	OK	StudyAdult.Castelo	-0.785938	0.155586	-5.0515	4.62e-07	-1.07159	count	0.0146851
21821	KHDRBS1	502	KHDRBS1	OK	StudyAdult.Castelo	-0.792879	0.117546	-6.7453	1.8e-11	-1.11031	count	5.81346e-07
35561	SERINC5	749	SERINC5	OK	StudyAdult.Castelo	-0.796219	0.0942067	-8.4518	4.26e-17	-1.12814	count	1.38744e-12
34079	RPL22	382	RPL22	OK	StudyAdult.Castelo	-0.798455	0.148855	-5.364	8.71e-08	-1.10122	count	0.00278049
8060	ARFGAP2	291	ARFGAP2	OK	StudyAdult.Castelo	-0.7997	0.164154	-4.8717	1.16e-06	-1.0916	count	0.036772
27005	NCOA4	353	NCOA4	OK	StudyAdult.Castelo	-0.806714	0.148167	-5.4446	5.58e-08	-1.10835	count	0.00178264
43742	ZDHHC9	982	ZDHHC9	OK	StudyAdult.Castelo	-0.808906	0.0745133	-10.8559	5.38e-27	-1.15156	count	1.7613e-22
45392	ZSCAN18	299	ZSCAN18	OK	StudyAdult.Castelo	-0.809529	0.157916	-5.1263	3.13e-07	-1.10579	count	0.00996029
26669	MYRF	1593	MYRF	OK	StudyAdult.Castelo	-0.810694	0.0500045	-16.2124	6.54e-57	-1.16154	count	2.14819e-52
35669	SF1	673	SF1	OK	StudyAdult.Castelo	-0.810719	0.0976643	-8.3011	1.49e-16	-1.1445	count	4.8501e-12
10652	CALCOCO1	339	CALCOCO1	OK	StudyAdult.Castelo	-0.810867	0.151882	-5.3388	1e-07	-1.11837	count	0.0031913
7430	ANXA5	527	ANXA5	OK	StudyAdult.Castelo	-0.815237	0.115858	-7.0365	2.39e-12	-1.14372	count	7.735e-08
27092	NDUFA12	307	NDUFA12	OK	StudyAdult.Castelo	-0.816059	0.167996	-4.8576	1.24e-06	-1.10573	count	0.039303
11816	CELSR2	522	CELSR2	OK	StudyAdult.Castelo	-0.817094	0.114824	-7.1161	1.36e-12	-1.14658	count	4.40368e-08
24269	MAP1LC3B	593	MAP1LC3B	OK	StudyAdult.Castelo	-0.820263	0.107281	-7.6459	2.71e-14	-1.15236	count	8.79612e-10
28796	PABPC1	566	PABPC1	OK	StudyAdult.Castelo	-0.821522	0.111553	-7.3644	2.24e-13	-1.15397	count	7.26208e-09
14966	DNM2	373	DNM2	OK	StudyAdult.Castelo	-0.824115	0.140278	-5.8749	4.66e-09	-1.14405	count	0.000149507
6971	ALDH3A2	319	ALDH3A2	OK	StudyAdult.Castelo	-0.826591	0.149392	-5.533	3.4e-08	-1.14146	count	0.00108752
25208	MIF	515	MIF	OK	StudyAdult.Castelo	-0.826769	0.107876	-7.6641	2.36e-14	-1.15924	count	7.66127e-10
30167	PIP4K2B	338	PIP4K2B	OK	StudyAdult.Castelo	-0.829046	0.150145	-5.5216	3.62e-08	-1.14052	count	0.0011576
41237	TSPAN3	518	TSPAN3	OK	StudyAdult.Castelo	-0.830473	0.119576	-6.9451	4.54e-12	-1.16114	count	1.46842e-07
40604	TOR1AIP1	270	TOR1AIP1	OK	StudyAdult.Castelo	-0.832885	0.167358	-4.9767	6.8e-07	-1.13575	count	0.0215914
12104	CFL2	1096	CFL2	OK	StudyAdult.Castelo	-0.834246	0.0700941	-11.9018	5.28e-32	-1.18943	count	1.73052e-27
40289	TMEM63A	733	TMEM63A	OK	StudyAdult.Castelo	-0.834834	0.0925851	-9.0169	3.22e-19	-1.18239	count	1.05052e-14
25457	MLXIP	276	MLXIP	OK	StudyAdult.Castelo	-0.835753	0.163748	-5.1039	3.52e-07	-1.13897	count	0.0111989
14174	DDB1	354	DDB1	OK	StudyAdult.Castelo	-0.836283	0.149681	-5.5871	2.5e-08	-1.14896	count	0.000799825
7058	ALKBH5	451	ALKBH5	OK	StudyAdult.Castelo	-0.837341	0.124013	-6.7521	1.72e-11	-1.16757	count	5.55577e-07
11987	CERCAM	1740	CERCAM	OK	StudyAdult.Castelo	-0.840516	0.0445809	-18.8537	2.42e-75	-1.20567	count	7.95357e-71
16046	EMC4	426	EMC4	OK	StudyAdult.Castelo	-0.84279	0.134843	-6.2502	4.63e-10	-1.16923	count	1.49007e-05
16700	FAM102A	880	FAM102A	OK	StudyAdult.Castelo	-0.849634	0.0783535	-10.8436	6.13e-27	-1.20745	count	2.00678e-22
15959	ELMO2	270	ELMO2	OK	StudyAdult.Castelo	-0.850589	0.173568	-4.9006	1e-06	-1.15039	count	0.03172
36200	SLC22A17	905	SLC22A17	OK	StudyAdult.Castelo	-0.855348	0.0798437	-10.7128	2.42e-26	-1.2159	count	7.92163e-22
25835	MRPL43	297	MRPL43	OK	StudyAdult.Castelo	-0.867682	0.162264	-5.3473	9.54e-08	-1.17868	count	0.00304488
19724	HDGF	287	HDGF	OK	StudyAdult.Castelo	-0.87575	0.163462	-5.3575	9.02e-08	-1.19619	count	0.00287918
16553	EXOC7	238	EXOC7	OK	StudyAdult.Castelo	-0.878016	0.18111	-4.848	1.31e-06	-1.17738	count	0.0415152
33488	RMND5A	384	RMND5A	OK	StudyAdult.Castelo	-0.87814	0.135325	-6.4891	9.94e-11	-1.22021	count	3.20495e-06
41159	TSC2	253	TSC2	OK	StudyAdult.Castelo	-0.878566	0.176159	-4.9873	6.44e-07	-1.19016	count	0.0204509
22277	KPNB1	509	KPNB1	OK	StudyAdult.Castelo	-0.881373	0.112331	-7.8462	5.77e-15	-1.23504	count	1.87479e-10
39752	TMBIM4	281	TMBIM4	OK	StudyAdult.Castelo	-0.881583	0.170131	-5.1818	2.33e-07	-1.1956	count	0.00741919
19958	HINT3	384	HINT3	OK	StudyAdult.Castelo	-0.88248	0.139739	-6.3152	3.06e-10	-1.22163	count	9.85259e-06
29885	PHF19	246	PHF19	OK	StudyAdult.Castelo	-0.883456	0.171869	-5.1403	2.9e-07	-1.20217	count	0.00922925
28793	PAAF1	361	PAAF1	OK	StudyAdult.Castelo	-0.885131	0.13807	-6.4107	1.66e-10	-1.22456	count	5.34869e-06
36836	SMARCA4	252	SMARCA4	OK	StudyAdult.Castelo	-0.886599	0.182684	-4.8532	1.27e-06	-1.18746	count	0.0402527
11273	CCDC92	294	CCDC92	OK	StudyAdult.Castelo	-0.887504	0.152033	-5.8376	5.82e-09	-1.21859	count	0.000186671
8189	ARHGEF2	694	ARHGEF2	OK	StudyAdult.Castelo	-0.887521	0.0929887	-9.5444	2.59e-21	-1.25535	count	8.45998e-17
9035	ATXN7L3B	297	ATXN7L3B	OK	StudyAdult.Castelo	-0.889028	0.158651	-5.6037	2.27e-08	-1.21767	count	0.000726468
5174	AGMO	234	AGMO	OK	StudyAdult.Castelo	-0.890718	0.165188	-5.3922	7.46e-08	-1.21667	count	0.00238213
33368	RHOT1	311	RHOT1	OK	StudyAdult.Castelo	-0.891633	0.152355	-5.8523	5.33e-09	-1.23048	count	0.00017097
6941	ALAD	220	ALAD	OK	StudyAdult.Castelo	-0.891981	0.180482	-4.9422	8.11e-07	-1.20927	count	0.0257428
30638	PNPLA2	263	PNPLA2	OK	StudyAdult.Castelo	-0.892272	0.158291	-5.6369	1.88e-08	-1.21574	count	0.000601882
30773	POLR2A	318	POLR2A	OK	StudyAdult.Castelo	-0.894201	0.147195	-6.0749	1.38e-09	-1.2256	count	4.43435e-05
17663	FLYWCH1	209	FLYWCH1	OK	StudyAdult.Castelo	-0.894545	0.185853	-4.8132	1.55e-06	-1.19876	count	0.0490854
42446	VAMP3	524	VAMP3	OK	StudyAdult.Castelo	-0.894945	0.109945	-8.14	5.57e-16	-1.25461	count	1.81192e-11
17204	FASN	413	FASN	OK	StudyAdult.Castelo	-0.895953	0.132732	-6.7501	1.74e-11	-1.24306	count	5.6202e-07
12521	CLIP3	496	CLIP3	OK	StudyAdult.Castelo	-0.901144	0.117739	-7.6537	2.55e-14	-1.26055	count	8.27755e-10
9620	BNIP3L	610	BNIP3L	OK	StudyAdult.Castelo	-0.904025	0.102897	-8.7858	2.46e-18	-1.27504	count	8.01911e-14
37916	SRRM2	892	SRRM2	OK	StudyAdult.Castelo	-0.911013	0.0790546	-11.5238	3.81e-30	-1.29465	count	1.24823e-25
8741	ATN1	320	ATN1	OK	StudyAdult.Castelo	-0.911799	0.152608	-5.9748	2.55e-09	-1.25479	count	8.18933e-05
26837	NAPA	427	NAPA	OK	StudyAdult.Castelo	-0.912791	0.127886	-7.1375	1.17e-12	-1.26828	count	3.78869e-08
21467	JUP	245	JUP	OK	StudyAdult.Castelo	-0.91544	0.18296	-5.0035	5.93e-07	-1.24575	count	0.0188355
41240	TSPAN31	214	TSPAN31	OK	StudyAdult.Castelo	-0.915551	0.180648	-5.0682	4.24e-07	-1.23182	count	0.0134807
23825	LRRC8D	443	LRRC8D	OK	StudyAdult.Castelo	-0.916369	0.122007	-7.5108	7.54e-14	-1.28052	count	2.4459e-09
41699	UBA1	635	UBA1	OK	StudyAdult.Castelo	-0.919234	0.100255	-9.169	8.24e-20	-1.29675	count	2.68937e-15
18902	GOLT1B	220	GOLT1B	OK	StudyAdult.Castelo	-0.921447	0.18327	-5.0278	5.23e-07	-1.23129	count	0.0166178
25112	MGRN1	268	MGRN1	OK	StudyAdult.Castelo	-0.921893	0.16859	-5.4683	4.89e-08	-1.26094	count	0.0015625
24539	MAU2	411	MAU2	OK	StudyAdult.Castelo	-0.922393	0.132069	-6.9842	3.46e-12	-1.28478	count	1.11948e-07
35648	SETD7	213	SETD7	OK	StudyAdult.Castelo	-0.926724	0.179172	-5.1723	2.45e-07	-1.24725	count	0.00780031
18380	GCA	366	GCA	OK	StudyAdult.Castelo	-0.929797	0.137665	-6.754	1.7e-11	-1.28998	count	5.49134e-07
11696	CDK5RAP3	661	CDK5RAP3	OK	StudyAdult.Castelo	-0.93878	0.096916	-9.6865	6.77e-22	-1.32585	count	2.21203e-17
37898	SRPRA	168	SRPRA	OK	StudyAdult.Castelo	-0.93997	0.1954	-4.8105	1.57e-06	-1.24898	count	0.0497172
11735	CDKN1C	1050	CDKN1C	OK	StudyAdult.Castelo	-0.941393	0.0664781	-14.161	3.18e-44	-1.34268	count	1.04406e-39
12437	CLCA4	201	CLCA4	OK	StudyAdult.Castelo	-0.945626	0.172963	-5.4672	4.92e-08	-1.28271	count	0.00157204
34958	SARNP	231	SARNP	OK	StudyAdult.Castelo	-0.947077	0.195503	-4.8443	1.33e-06	-1.26057	count	0.042145
31814	PSMD10	292	PSMD10	OK	StudyAdult.Castelo	-0.947159	0.157078	-6.0299	1.82e-09	-1.29153	count	5.84584e-05
4742	ACTR1B	293	ACTR1B	OK	StudyAdult.Castelo	-0.952477	0.153026	-6.2243	5.46e-10	-1.30159	count	1.75686e-05
14927	DNAJC8	291	DNAJC8	OK	StudyAdult.Castelo	-0.953356	0.175531	-5.4313	6.01e-08	-1.29505	count	0.00191959
43571	ZBTB7A	374	ZBTB7A	OK	StudyAdult.Castelo	-0.959514	0.12726	-7.5398	6.07e-14	-1.33676	count	1.96935e-09
27422	NFIC	757	NFIC	OK	StudyAdult.Castelo	-0.959641	0.0850027	-11.2895	5.07e-29	-1.36045	count	1.66063e-24
30692	POGK	283	POGK	OK	StudyAdult.Castelo	-0.960147	0.158855	-6.0442	1.67e-09	-1.30871	count	5.36437e-05
5132	AGAP3	404	AGAP3	OK	StudyAdult.Castelo	-0.960338	0.127929	-7.5068	7.77e-14	-1.33838	count	2.52043e-09
26399	MTRR	350	MTRR	OK	StudyAdult.Castelo	-0.961049	0.139485	-6.89	6.67e-12	-1.33242	count	2.15688e-07
15767	EIF2AK1	237	EIF2AK1	OK	StudyAdult.Castelo	-0.975514	0.168368	-5.794	7.53e-09	-1.32112	count	0.000241412
43322	YPEL3	687	YPEL3	OK	StudyAdult.Castelo	-0.976602	0.0922224	-10.5896	8.69e-26	-1.38215	count	2.84398e-21
26603	MYO10	415	MYO10	OK	StudyAdult.Castelo	-0.97969	0.128495	-7.6243	3.2e-14	-1.36275	count	1.03859e-09
18743	GNA11	253	GNA11	OK	StudyAdult.Castelo	-0.986638	0.178921	-5.5144	3.77e-08	-1.34369	count	0.00120546
11480	CD82	350	CD82	OK	StudyAdult.Castelo	-0.986943	0.146415	-6.7407	1.86e-11	-1.36438	count	6.00668e-07
31007	PPIF	203	PPIF	OK	StudyAdult.Castelo	-0.987409	0.196551	-5.0237	5.34e-07	-1.30637	count	0.0169668
9449	BEST1	402	BEST1	OK	StudyAdult.Castelo	-0.987685	0.12176	-8.1117	6.99e-16	-1.37524	count	2.27343e-11
25406	MKRN1	224	MKRN1	OK	StudyAdult.Castelo	-0.987685	0.180229	-5.4802	4.57e-08	-1.32914	count	0.00146053
25802	MRPL33	309	MRPL33	OK	StudyAdult.Castelo	-0.990083	0.15797	-6.2675	4.15e-10	-1.35324	count	1.33576e-05
11249	CCDC84	268	CCDC84	OK	StudyAdult.Castelo	-0.991263	0.157688	-6.2862	3.68e-10	-1.35421	count	1.18463e-05
12752	CNPPD1	257	CNPPD1	OK	StudyAdult.Castelo	-0.991263	0.168181	-5.894	4.15e-09	-1.33657	count	0.000133169
15884	EIF4G2	749	EIF4G2	OK	StudyAdult.Castelo	-0.991953	0.0883894	-11.2225	1.05e-28	-1.40364	count	3.43885e-24
42815	WBP2	961	WBP2	OK	StudyAdult.Castelo	-0.992285	0.0745042	-13.3185	1.9e-39	-1.41113	count	6.23561e-35
27086	NDUFA10	352	NDUFA10	OK	StudyAdult.Castelo	-0.993397	0.145528	-6.8262	1.04e-11	-1.36458	count	3.3619e-07
40985	TRIM59	205	TRIM59	OK	StudyAdult.Castelo	-0.995287	0.189039	-5.265	1.49e-07	-1.32824	count	0.00475027
14066	DCAF8	320	DCAF8	OK	StudyAdult.Castelo	-1.0026	0.149003	-6.7287	2.01e-11	-1.37536	count	6.49049e-07
25067	MFSD6	325	MFSD6	OK	StudyAdult.Castelo	-1.0034	0.14091	-7.1208	1.31e-12	-1.38503	count	4.24191e-08
14819	DNAJB1	497	DNAJB1	OK	StudyAdult.Castelo	-1.00555	0.110506	-9.0996	1.54e-19	-1.41156	count	5.02548e-15
38906	TAX1BP3	194	TAX1BP3	OK	StudyAdult.Castelo	-1.00615	0.179545	-5.6039	2.27e-08	-1.34676	count	0.000726468
42995	WDR83OS	333	WDR83OS	OK	StudyAdult.Castelo	-1.00928	0.152822	-6.6043	4.65e-11	-1.38268	count	1.50028e-06
8090	ARHGAP1	671	ARHGAP1	OK	StudyAdult.Castelo	-1.01374	0.0925561	-10.9527	1.93e-27	-1.43286	count	6.3194e-23
19178	GREM1	404	GREM1	OK	StudyAdult.Castelo	-1.01492	0.126918	-7.9966	1.76e-15	-1.42013	count	5.72176e-11
31598	PRPF8	361	PRPF8	OK	StudyAdult.Castelo	-1.01569	0.140889	-7.2092	6.96e-13	-1.39991	count	2.25469e-08
40121	TMEM230	314	TMEM230	OK	StudyAdult.Castelo	-1.01741	0.155258	-6.553	6.53e-11	-1.3951	count	2.10638e-06
19292	GSK3A	203	GSK3A	OK	StudyAdult.Castelo	-1.02203	0.187054	-5.4639	5.01e-08	-1.36825	count	0.0016007
33287	RGS11	220	RGS11	OK	StudyAdult.Castelo	-1.02409	0.177451	-5.7711	8.61e-09	-1.36975	count	0.000275968
18848	GNPTG	482	GNPTG	OK	StudyAdult.Castelo	-1.02669	0.113932	-9.0114	3.39e-19	-1.4369	count	1.10595e-14
19655	HCFC1	159	HCFC1	OK	StudyAdult.Castelo	-1.03698	0.215326	-4.8159	1.53e-06	-1.35291	count	0.0484536
27626	NLGN2	321	NLGN2	OK	StudyAdult.Castelo	-1.03712	0.145986	-7.1042	1.48e-12	-1.42393	count	4.79209e-08
23951	LUC7L2	477	LUC7L2	OK	StudyAdult.Castelo	-1.03835	0.110223	-9.4204	8.24e-21	-1.45497	count	2.69052e-16
20924	IMPAD1	404	IMPAD1	OK	StudyAdult.Castelo	-1.03901	0.124538	-8.3429	1.06e-16	-1.44655	count	3.45083e-12
31568	PRPF3	234	PRPF3	OK	StudyAdult.Castelo	-1.04005	0.171079	-6.0794	1.35e-09	-1.40529	count	4.33809e-05
32048	PTPN23	217	PTPN23	OK	StudyAdult.Castelo	-1.05063	0.181544	-5.7872	7.83e-09	-1.41245	count	0.000250998
13601	CTDSP1	147	CTDSP1	OK	StudyAdult.Castelo	-1.05263	0.215547	-4.8835	1.09e-06	-1.37012	count	0.0345661
11732	CDKN1B	594	CDKN1B	OK	StudyAdult.Castelo	-1.05276	0.0989551	-10.6387	5.23e-26	-1.48436	count	1.71173e-21
14183	DDHD2	170	DDHD2	OK	StudyAdult.Castelo	-1.05786	0.209977	-5.038	4.96e-07	-1.38444	count	0.0157634
10964	CBX4	233	CBX4	OK	StudyAdult.Castelo	-1.06044	0.167848	-6.3179	3.01e-10	-1.43767	count	9.6919e-06
20477	HSPA8	717	HSPA8	OK	StudyAdult.Castelo	-1.06484	0.0903639	-11.7839	2.03e-31	-1.50463	count	6.65251e-27
8393	ARPC1A	236	ARPC1A	OK	StudyAdult.Castelo	-1.07598	0.191816	-5.6095	2.2e-08	-1.43352	count	0.000704154
34928	SAP30	155	SAP30	OK	StudyAdult.Castelo	-1.07827	0.212429	-5.0759	4.07e-07	-1.40149	count	0.0129422
20180	HNRNPA1	465	HNRNPA1	OK	StudyAdult.Castelo	-1.07923	0.120666	-8.9439	6.16e-19	-1.50449	count	2.00902e-14
16982	FAM219A	263	FAM219A	OK	StudyAdult.Castelo	-1.08534	0.156831	-6.9204	5.4e-12	-1.48531	count	1.74631e-07
15257	DTX3	293	DTX3	OK	StudyAdult.Castelo	-1.08931	0.161445	-6.7472	1.78e-11	-1.48939	count	5.74922e-07
35303	SEC13	194	SEC13	OK	StudyAdult.Castelo	-1.09378	0.208993	-5.2336	1.77e-07	-1.42257	count	0.00564064
42245	USP11	441	USP11	OK	StudyAdult.Castelo	-1.09493	0.124434	-8.7993	2.19e-18	-1.52266	count	7.13962e-14
29372	PCSK7	191	PCSK7	OK	StudyAdult.Castelo	-1.09889	0.199198	-5.5166	3.73e-08	-1.46122	count	0.0011927
32882	RBM23	206	RBM23	OK	StudyAdult.Castelo	-1.10218	0.191049	-5.7691	8.71e-09	-1.46401	count	0.000279164
26027	MSL1	316	MSL1	OK	StudyAdult.Castelo	-1.10433	0.146666	-7.5296	6.55e-14	-1.52086	count	2.12495e-09
34997	SAV1	212	SAV1	OK	StudyAdult.Castelo	-1.10643	0.17852	-6.1978	6.44e-10	-1.4976	count	2.07155e-05
36116	SLC11A2	339	SLC11A2	OK	StudyAdult.Castelo	-1.10905	0.140925	-7.8698	4.79e-15	-1.52529	count	1.55656e-10
39272	TERF2IP	598	TERF2IP	OK	StudyAdult.Castelo	-1.11162	0.099156	-11.2108	1.2e-28	-1.56309	count	3.92988e-24
36854	SMARCC2	277	SMARCC2	OK	StudyAdult.Castelo	-1.1139	0.163635	-6.8072	1.18e-11	-1.51444	count	3.81376e-07
41270	TSPYL4	155	TSPYL4	OK	StudyAdult.Castelo	-1.11556	0.222884	-5.0051	5.88e-07	-1.45129	count	0.0186778
17255	FBRS	196	FBRS	OK	StudyAdult.Castelo	-1.11636	0.183154	-6.0952	1.22e-09	-1.50011	count	3.92096e-05
38324	STRN4	222	STRN4	OK	StudyAdult.Castelo	-1.11949	0.17387	-6.4386	1.38e-10	-1.51542	count	4.44788e-06
10757	CAPN2	295	CAPN2	OK	StudyAdult.Castelo	-1.12212	0.153672	-7.302	3.54e-13	-1.53456	count	1.14742e-08
9017	ATXN2L	288	ATXN2L	OK	StudyAdult.Castelo	-1.12436	0.149456	-7.523	6.88e-14	-1.54263	count	2.23194e-09
8306	ARL6IP1	364	ARL6IP1	OK	StudyAdult.Castelo	-1.126	0.140969	-7.9875	1.89e-15	-1.55074	count	6.1442e-11
44036	ZNF133	145	ZNF133	OK	StudyAdult.Castelo	-1.12644	0.221821	-5.0781	4.03e-07	-1.44506	count	0.0128158
26798	NAGK	269	NAGK	OK	StudyAdult.Castelo	-1.13137	0.166411	-6.7987	1.25e-11	-1.53085	count	4.03975e-07
15329	DUSP7	255	DUSP7	OK	StudyAdult.Castelo	-1.13296	0.158259	-7.1589	1e-12	-1.54949	count	3.2386e-08
28808	PABPN1	343	PABPN1	OK	StudyAdult.Castelo	-1.13644	0.129152	-8.7993	2.19e-18	-1.57711	count	7.13962e-14
10256	C21orf91	410	C21orf91	OK	StudyAdult.Castelo	-1.13722	0.116785	-9.7377	4.15e-22	-1.5868	count	1.3561e-17
13829	CYB5R2	178	CYB5R2	OK	StudyAdult.Castelo	-1.13732	0.191473	-5.9398	3.15e-09	-1.50677	count	0.000101121
20222	HNRNPL	420	HNRNPL	OK	StudyAdult.Castelo	-1.13863	0.127166	-8.9539	5.64e-19	-1.58344	count	1.83954e-14
32564	RAD54L2	138	RAD54L2	OK	StudyAdult.Castelo	-1.1403	0.219014	-5.2065	2.04e-07	-1.47917	count	0.00649822
19643	HBEGF	162	HBEGF	OK	StudyAdult.Castelo	-1.14541	0.196805	-5.82	6.45e-09	-1.50724	count	0.000206813
21836	KHSRP	303	KHSRP	OK	StudyAdult.Castelo	-1.1462	0.149064	-7.6893	1.94e-14	-1.57162	count	6.29918e-10
31367	PRDX2	287	PRDX2	OK	StudyAdult.Castelo	-1.14744	0.167492	-6.8507	8.75e-12	-1.55169	count	2.82896e-07
14840	DNAJB6	364	DNAJB6	OK	StudyAdult.Castelo	-1.14964	0.139847	-8.2207	2.89e-16	-1.58461	count	9.40464e-12
10286	C2orf42	113	C2orf42	OK	StudyAdult.Castelo	-1.154	0.234652	-4.9179	9.18e-07	-1.45915	count	0.0291291
39698	TLN1	311	TLN1	OK	StudyAdult.Castelo	-1.15557	0.141332	-8.1762	4.15e-16	-1.59069	count	1.35016e-11
27170	NDUFB5	502	NDUFB5	OK	StudyAdult.Castelo	-1.15718	0.112776	-10.2609	2.47e-24	-1.61684	count	8.07986e-20
7919	APCDD1	236	APCDD1	OK	StudyAdult.Castelo	-1.15742	0.178782	-6.4739	1.1e-10	-1.57359	count	3.5464e-06
19568	HADH	172	HADH	OK	StudyAdult.Castelo	-1.16239	0.20752	-5.6013	2.3e-08	-1.50821	count	0.000735977
38699	TAB1	189	TAB1	OK	StudyAdult.Castelo	-1.16582	0.186104	-6.2644	4.23e-10	-1.55116	count	1.36147e-05
19106	GPRC5B	1424	GPRC5B	OK	StudyAdult.Castelo	-1.16948	0.0508389	-23.0036	1.22e-108	-1.67499	count	4.01197e-104
13040	COPS8	173	COPS8	OK	StudyAdult.Castelo	-1.16951	0.225906	-5.177	2.39e-07	-1.49026	count	0.00761
26522	MYADM	197	MYADM	OK	StudyAdult.Castelo	-1.17658	0.176571	-6.6635	3.13e-11	-1.58464	count	1.01036e-06
38156	STAT1	132	STAT1	OK	StudyAdult.Castelo	-1.17767	0.235607	-4.9985	6.08e-07	-1.49985	count	0.0193107
22076	KLF15	226	KLF15	OK	StudyAdult.Castelo	-1.17795	0.164576	-7.1575	1.01e-12	-1.59804	count	3.27088e-08
12590	CLTA	362	CLTA	OK	StudyAdult.Castelo	-1.18364	0.1355	-8.7354	3.81e-18	-1.62955	count	1.24187e-13
20720	IFRD1	184	IFRD1	OK	StudyAdult.Castelo	-1.18721	0.192031	-6.1824	7.1e-10	-1.55892	count	2.28343e-05
24983	METTL7A	586	METTL7A	OK	StudyAdult.Castelo	-1.1885	0.0944379	-12.5849	1.69e-35	-1.67943	count	5.54286e-31
8138	ARHGAP33	203	ARHGAP33	OK	StudyAdult.Castelo	-1.1942	0.192742	-6.1959	6.52e-10	-1.581	count	2.09722e-05
25679	MPV17	251	MPV17	OK	StudyAdult.Castelo	-1.19724	0.166867	-7.1748	8.92e-13	-1.61607	count	2.88901e-08
7130	AMOTL2	626	AMOTL2	OK	StudyAdult.Castelo	-1.20056	0.0926146	-12.9629	1.65e-37	-1.69789	count	5.41365e-33
14600	DIMT1	144	DIMT1	OK	StudyAdult.Castelo	-1.20257	0.236182	-5.0917	3.75e-07	-1.52901	count	0.0119284
15275	DUS1L	135	DUS1L	OK	StudyAdult.Castelo	-1.21301	0.21744	-5.5786	2.62e-08	-1.57398	count	0.00083819
29117	PCDH10	326	PCDH10	OK	StudyAdult.Castelo	-1.21355	0.142524	-8.5147	2.51e-17	-1.67401	count	8.17683e-13
22226	KMT2D	126	KMT2D	OK	StudyAdult.Castelo	-1.21739	0.22637	-5.3779	8.07e-08	-1.56949	count	0.00257651
14651	DKC1	148	DKC1	OK	StudyAdult.Castelo	-1.21874	0.24708	-4.9326	8.52e-07	-1.57614	count	0.0270408
15134	DPY30	342	DPY30	OK	StudyAdult.Castelo	-1.22186	0.140088	-8.7221	4.28e-18	-1.6789	count	1.39498e-13
19112	GPS2	280	GPS2	OK	StudyAdult.Castelo	-1.22761	0.154412	-7.9502	2.54e-15	-1.6773	count	8.25602e-11
20237	HNRNPUL1	403	HNRNPUL1	OK	StudyAdult.Castelo	-1.23116	0.124949	-9.8533	1.37e-22	-1.71441	count	4.47798e-18
13775	CXADR	341	CXADR	OK	StudyAdult.Castelo	-1.23324	0.139958	-8.8115	1.97e-18	-1.69074	count	6.42299e-14
31865	PSME3	129	PSME3	OK	StudyAdult.Castelo	-1.24299	0.25414	-4.891	1.05e-06	-1.54964	count	0.0333018
12848	COG1	112	COG1	OK	StudyAdult.Castelo	-1.24299	0.25213	-4.93	8.64e-07	-1.54964	count	0.0274208
19040	GPR108	145	GPR108	OK	StudyAdult.Castelo	-1.24339	0.215605	-5.767	8.82e-09	-1.62591	count	0.000282681
24224	MAN2A2	273	MAN2A2	OK	StudyAdult.Castelo	-1.2486	0.152581	-8.1832	3.92e-16	-1.70353	count	1.27541e-11
21458	JUN	294	JUN	OK	StudyAdult.Castelo	-1.25004	0.154593	-8.086	8.61e-16	-1.71462	count	2.79989e-11
28430	OAZ1	458	OAZ1	OK	StudyAdult.Castelo	-1.25185	0.124187	-10.0803	1.49e-23	-1.74358	count	4.8726e-19
8051	ARF5	163	ARF5	OK	StudyAdult.Castelo	-1.25304	0.247055	-5.0719	4.16e-07	-1.56096	count	0.0132271
19337	GSTO2	230	GSTO2	OK	StudyAdult.Castelo	-1.25535	0.157654	-7.9627	2.3e-15	-1.70584	count	7.47615e-11
32255	QDPR	1086	QDPR	OK	StudyAdult.Castelo	-1.25732	0.0618716	-20.3215	1.53e-86	-1.79538	count	5.02987e-82
40340	TMEM8B	120	TMEM8B	OK	StudyAdult.Castelo	-1.2632	0.246764	-5.119	3.25e-07	-1.59593	count	0.0103415
18551	GIGYF1	244	GIGYF1	OK	StudyAdult.Castelo	-1.2632	0.167146	-7.5575	5.31e-14	-1.71833	count	1.7231e-09
11339	CCNK	123	CCNK	OK	StudyAdult.Castelo	-1.2632	0.226773	-5.5703	2.75e-08	-1.6212	count	0.000879725
37673	SPHK2	121	SPHK2	OK	StudyAdult.Castelo	-1.2632	0.233207	-5.4166	6.51e-08	-1.61241	count	0.0020791
20078	HM13	193	HM13	OK	StudyAdult.Castelo	-1.26955	0.204283	-6.2146	5.8e-10	-1.66566	count	1.86609e-05
8117	ARHGAP23	949	ARHGAP23	OK	StudyAdult.Castelo	-1.27023	0.0677251	-18.7557	1.28e-74	-1.81013	count	4.20646e-70
32006	PTP4A2	815	PTP4A2	OK	StudyAdult.Castelo	-1.27109	0.0766557	-16.5818	2.38e-59	-1.80557	count	7.81854e-55
22598	LEPROTL1	152	LEPROTL1	OK	StudyAdult.Castelo	-1.27325	0.251303	-5.0666	4.28e-07	-1.58796	count	0.0136074
11753	CDKN2C	162	CDKN2C	OK	StudyAdult.Castelo	-1.27378	0.195333	-6.5211	8.06e-11	-1.69655	count	2.59919e-06
35771	SGK3	479	SGK3	OK	StudyAdult.Castelo	-1.27569	0.104612	-12.1944	1.76e-33	-1.78988	count	5.77016e-29
21461	JUNB	163	JUNB	OK	StudyAdult.Castelo	-1.281	0.211295	-6.0626	1.49e-09	-1.69044	count	4.78692e-05
41639	TYK2	150	TYK2	OK	StudyAdult.Castelo	-1.28262	0.209036	-6.1358	9.49e-10	-1.67971	count	3.05075e-05
8408	ARPC5	323	ARPC5	OK	StudyAdult.Castelo	-1.29325	0.145004	-8.9187	7.69e-19	-1.77222	count	2.50771e-14
17570	FIP1L1	139	FIP1L1	OK	StudyAdult.Castelo	-1.29635	0.249789	-5.1898	2.23e-07	-1.5952	count	0.00710188
22403	LAMP2	1180	LAMP2	OK	StudyAdult.Castelo	-1.29773	0.0566936	-22.8903	1.15e-107	-1.85497	count	3.78166e-103
35714	SFRP1	397	SFRP1	OK	StudyAdult.Castelo	-1.29836	0.123354	-10.5255	1.68e-25	-1.81366	count	5.49746e-21
38861	TARDBP	206	TARDBP	OK	StudyAdult.Castelo	-1.31397	0.194002	-6.773	1.49e-11	-1.755	count	4.81449e-07
36257	SLC25A23	109	SLC25A23	OK	StudyAdult.Castelo	-1.31785	0.266785	-4.9398	8.22e-07	-1.62379	count	0.0260895
21353	IVD	218	IVD	OK	StudyAdult.Castelo	-1.32382	0.180885	-7.3186	3.14e-13	-1.76868	count	1.01783e-08
13550	CSRNP2	142	CSRNP2	OK	StudyAdult.Castelo	-1.33064	0.21874	-6.0832	1.31e-09	-1.71717	count	4.20969e-05
38738	TAF10	163	TAF10	OK	StudyAdult.Castelo	-1.3373	0.204434	-6.5415	7.04e-11	-1.74402	count	2.27068e-06
24503	MARS	186	MARS	OK	StudyAdult.Castelo	-1.34417	0.191037	-7.0361	2.4e-12	-1.77676	count	7.76712e-08
36866	SMARCE1	274	SMARCE1	OK	StudyAdult.Castelo	-1.34879	0.15879	-8.4942	2.99e-17	-1.82767	count	9.73933e-13
37781	SPTLC1	233	SPTLC1	OK	StudyAdult.Castelo	-1.35021	0.166972	-8.0865	8.57e-16	-1.80932	count	2.78696e-11
40676	TPGS2	171	TPGS2	OK	StudyAdult.Castelo	-1.35021	0.227128	-5.9447	3.06e-09	-1.73207	count	9.82382e-05
21689	KCTD10	105	KCTD10	OK	StudyAdult.Castelo	-1.35751	0.272296	-4.9854	6.51e-07	-1.68187	count	0.0206725
41672	U2AF2	232	U2AF2	OK	StudyAdult.Castelo	-1.35927	0.162968	-8.3407	1.08e-16	-1.84373	count	3.51583e-12
21320	ITPK1	377	ITPK1	OK	StudyAdult.Castelo	-1.36653	0.12524	-10.9113	2.99e-27	-1.89868	count	9.78956e-23
18026	FUT10	87	FUT10	OK	StudyAdult.Castelo	-1.36856	0.278925	-4.9065	9.72e-07	-1.69405	count	0.0308357
16547	EXOC6	407	EXOC6	OK	StudyAdult.Castelo	-1.37053	0.117546	-11.6595	8.32e-31	-1.90623	count	2.72605e-26
39719	TM2D3	178	TM2D3	OK	StudyAdult.Castelo	-1.37141	0.220428	-6.2216	5.55e-10	-1.78728	count	1.78577e-05
17021	FAM234A	134	FAM234A	OK	StudyAdult.Castelo	-1.37484	0.205505	-6.69	2.62e-11	-1.7747	count	8.45815e-07
8465	ART3	205	ART3	OK	StudyAdult.Castelo	-1.38286	0.167117	-8.2748	1.85e-16	-1.87585	count	6.02157e-12
28949	PAQR3	95	PAQR3	OK	StudyAdult.Castelo	-1.3858	0.268252	-5.166	2.53e-07	-1.64797	count	0.00805451
31268	PPP5C	98	PPP5C	OK	StudyAdult.Castelo	-1.38924	0.287699	-4.8288	1.44e-06	-1.64406	count	0.0456106
12530	CLK2	109	CLK2	OK	StudyAdult.Castelo	-1.39145	0.252935	-5.5012	4.06e-08	-1.73733	count	0.0012979
19556	HACD2	242	HACD2	OK	StudyAdult.Castelo	-1.39986	0.15167	-9.2296	4.75e-20	-1.90108	count	1.55054e-15
16307	ERBB3	634	ERBB3	OK	StudyAdult.Castelo	-1.40157	0.0898785	-15.5941	6.23e-53	-1.98089	count	2.04599e-48
41543	TUSC1	123	TUSC1	OK	StudyAdult.Castelo	-1.40334	0.231138	-6.0715	1.41e-09	-1.79095	count	4.53033e-05
16226	EPCAM	89	EPCAM	OK	StudyAdult.Castelo	-1.4063	0.279187	-5.0371	4.98e-07	-1.70854	count	0.0158259
19508	H1FX	297	H1FX	OK	StudyAdult.Castelo	-1.4063	0.141498	-9.9386	5.97e-23	-1.92851	count	1.95165e-18
8651	ATF3	129	ATF3	OK	StudyAdult.Castelo	-1.40778	0.212078	-6.638	3.71e-11	-1.83088	count	1.19737e-06
39239	TENM3	251	TENM3	OK	StudyAdult.Castelo	-1.40919	0.149035	-9.4555	5.95e-21	-1.93672	count	1.94297e-16
15908	EIF6	159	EIF6	OK	StudyAdult.Castelo	-1.41443	0.265818	-5.321	1.1e-07	-1.77537	count	0.00350878
37997	SSPN	90	SSPN	OK	StudyAdult.Castelo	-1.41554	0.27065	-5.2301	1.8e-07	-1.72416	count	0.00573588
14339	DEDD	93	DEDD	OK	StudyAdult.Castelo	-1.41735	0.289476	-4.8962	1.02e-06	-1.70141	count	0.0323524
40355	TMEM98	385	TMEM98	OK	StudyAdult.Castelo	-1.42029	0.125655	-11.3031	4.37e-29	-1.97361	count	1.43144e-24
30350	PLCG1	164	PLCG1	OK	StudyAdult.Castelo	-1.4211	0.188281	-7.5477	5.71e-14	-1.86942	count	1.85284e-09
37925	SRSF1	320	SRSF1	OK	StudyAdult.Castelo	-1.42504	0.142208	-10.0208	2.67e-23	-1.95815	count	8.7301e-19
36992	SMIM7	184	SMIM7	OK	StudyAdult.Castelo	-1.42708	0.20236	-7.0522	2.14e-12	-1.87101	count	6.92632e-08
38474	SUN1	231	SUN1	OK	StudyAdult.Castelo	-1.42985	0.173323	-8.2496	2.28e-16	-1.91693	count	7.42026e-12
19994	HIST1H2BD	81	HIST1H2BD	OK	StudyAdult.Castelo	-1.43647	0.269822	-5.3238	1.09e-07	-1.73429	count	0.0034771
20300	HPS4	155	HPS4	OK	StudyAdult.Castelo	-1.43722	0.206753	-6.9514	4.35e-12	-1.8508	count	1.40709e-07
10769	CAPNS1	279	CAPNS1	OK	StudyAdult.Castelo	-1.44034	0.145192	-9.9202	7.15e-23	-1.96616	count	2.33726e-18
29999	PIAS3	94	PIAS3	OK	StudyAdult.Castelo	-1.44144	0.262718	-5.4867	4.41e-08	-1.76839	count	0.00140948
4850	ADAMTS14	123	ADAMTS14	OK	StudyAdult.Castelo	-1.44289	0.213322	-6.7639	1.59e-11	-1.86787	count	5.13713e-07
29381	PCYT1A	60	PCYT1A	OK	StudyAdult.Castelo	-1.44552	0.298419	-4.8439	1.33e-06	-1.68408	count	0.042145
10295	C2orf69	113	C2orf69	OK	StudyAdult.Castelo	-1.44552	0.237933	-6.0753	1.38e-09	-1.81015	count	4.43435e-05
18302	GAS1	74	GAS1	OK	StudyAdult.Castelo	-1.45007	0.288247	-5.0307	5.15e-07	-1.74851	count	0.0163646
1826	AC016831.7	239	AC016831.7	OK	StudyAdult.Castelo	-1.45371	0.150819	-9.6388	1.06e-21	-1.9785	count	3.46291e-17
13682	CTSO	95	CTSO	OK	StudyAdult.Castelo	-1.45425	0.275682	-5.2751	1.41e-07	-1.76521	count	0.00449593
41642	TYMS	164	TYMS	OK	StudyAdult.Castelo	-1.45449	0.186602	-7.7946	8.62e-15	-1.94546	count	2.80012e-10
8210	ARHGEF40	86	ARHGEF40	OK	StudyAdult.Castelo	-1.45486	0.28976	-5.0209	5.42e-07	-1.74698	count	0.0172193
42275	USP21	108	USP21	OK	StudyAdult.Castelo	-1.45557	0.245028	-5.9404	3.14e-09	-1.83328	count	0.000100803
19862	HEXA	136	HEXA	OK	StudyAdult.Castelo	-1.46205	0.236804	-6.1741	7.47e-10	-1.84434	count	2.4022e-05
27998	NR4A2	86	NR4A2	OK	StudyAdult.Castelo	-1.47084	0.282971	-5.1978	2.14e-07	-1.79436	count	0.00681633
29870	PHF10	104	PHF10	OK	StudyAdult.Castelo	-1.4805	0.237313	-6.2386	4.98e-10	-1.87605	count	1.60266e-05
21053	INTS3	109	INTS3	OK	StudyAdult.Castelo	-1.48145	0.266342	-5.5622	2.88e-08	-1.82188	count	0.000921254
20606	ID2	179	ID2	OK	StudyAdult.Castelo	-1.48283	0.206814	-7.1698	9.25e-13	-1.90113	count	2.9958e-08
12455	CLCN6	136	CLCN6	OK	StudyAdult.Castelo	-1.48283	0.225753	-6.5683	5.9e-11	-1.90113	count	1.90334e-06
9734	BRI3	217	BRI3	OK	StudyAdult.Castelo	-1.48428	0.170654	-8.6976	5.28e-18	-1.99359	count	1.72086e-13
22091	KLF6	112	KLF6	OK	StudyAdult.Castelo	-1.48634	0.287727	-5.1658	2.54e-07	-1.75758	count	0.00808609
8777	ATP1A1	346	ATP1A1	OK	StudyAdult.Castelo	-1.48821	0.127583	-11.6646	7.85e-31	-2.0547	count	2.57213e-26
43193	XPR1	443	XPR1	OK	StudyAdult.Castelo	-1.49923	0.114965	-13.0407	6.27e-38	-2.09546	count	2.05731e-33
21311	ITM2B	1030	ITM2B	OK	StudyAdult.Castelo	-1.50632	0.0646722	-23.2916	3.96e-111	-2.14818	count	1.30229e-106
17591	FKBP1A	199	FKBP1A	OK	StudyAdult.Castelo	-1.51285	0.204586	-7.3947	1.79e-13	-1.97414	count	5.80408e-09
15644	EFHC1	134	EFHC1	OK	StudyAdult.Castelo	-1.53549	0.219611	-6.9919	3.28e-12	-2.00112	count	1.06131e-07
13472	CRYZL1	190	CRYZL1	OK	StudyAdult.Castelo	-1.53763	0.182699	-8.4162	5.74e-17	-2.03078	count	1.86923e-12
26567	MYH7B	119	MYH7B	OK	StudyAdult.Castelo	-1.55088	0.217209	-7.14	1.15e-12	-1.98256	count	3.72404e-08
39296	TEX14	57	TEX14	OK	StudyAdult.Castelo	-1.55088	0.316485	-4.9003	1e-06	-1.76575	count	0.03172
52223	CD74	114	CD74	OK	StudyAdult.Castelo	-1.55546	0.23615	-6.5867	5.22e-11	-1.99086	count	1.68408e-06
11198	CCDC47	226	CCDC47	OK	StudyAdult.Castelo	-1.5561	0.168823	-9.2174	5.31e-20	-2.09186	count	1.73318e-15
19430	GTPBP1	103	GTPBP1	OK	StudyAdult.Castelo	-1.55719	0.26356	-5.9083	3.81e-09	-1.91337	count	0.000122271
18125	GABBR1	112	GABBR1	OK	StudyAdult.Castelo	-1.55866	0.288543	-5.4018	7.07e-08	-1.85284	count	0.0022578
32810	RBBP7	202	RBBP7	OK	StudyAdult.Castelo	-1.56103	0.192305	-8.1175	6.68e-16	-2.05749	count	2.17274e-11
9164	BABAM1	145	BABAM1	OK	StudyAdult.Castelo	-1.56103	0.244601	-6.3819	2e-10	-1.97407	count	6.4428e-06
7910	APBB3	134	APBB3	OK	StudyAdult.Castelo	-1.56467	0.220247	-7.1042	1.48e-12	-2.00143	count	4.79209e-08
35369	SEC61A2	170	SEC61A2	OK	StudyAdult.Castelo	-1.56858	0.198716	-7.8936	3.98e-15	-2.05923	count	1.29342e-10
17291	FBXL3	257	FBXL3	OK	StudyAdult.Castelo	-1.57068	0.156583	-10.031	2.42e-23	-2.15657	count	7.91292e-19
29825	PGS1	144	PGS1	OK	StudyAdult.Castelo	-1.57335	0.222109	-7.0837	1.71e-12	-2.01738	count	5.53613e-08
31001	PPIE	141	PPIE	OK	StudyAdult.Castelo	-1.57828	0.23895	-6.6051	4.62e-11	-2.02006	count	1.49064e-06
41189	TSG101	430	TSG101	OK	StudyAdult.Castelo	-1.58314	0.115299	-13.7308	9.43e-42	-2.20029	count	3.09568e-37
13172	COX7A2L	140	COX7A2L	OK	StudyAdult.Castelo	-1.58988	0.243596	-6.5267	7.77e-11	-1.98643	count	2.50582e-06
27872	NPDC1	159	NPDC1	OK	StudyAdult.Castelo	-1.59123	0.246203	-6.4631	1.18e-10	-1.97913	count	3.80408e-06
17756	FOS	216	FOS	OK	StudyAdult.Castelo	-1.5917	0.191434	-8.3146	1.33e-16	-2.13305	count	4.32942e-12
35435	SELL	74	SELL	OK	StudyAdult.Castelo	-1.59634	0.272288	-5.8627	5.01e-09	-1.98915	count	0.000160726
36488	SLC35E2B	95	SLC35E2B	OK	StudyAdult.Castelo	-1.59967	0.314371	-5.0885	3.81e-07	-1.82167	count	0.0121185
44321	ZNF3	93	ZNF3	OK	StudyAdult.Castelo	-1.59967	0.316742	-5.0504	4.65e-07	-1.82167	count	0.01478
45329	ZNHIT3	103	ZNHIT3	OK	StudyAdult.Castelo	-1.6018	0.289831	-5.5267	3.52e-08	-1.92447	count	0.00112577
30476	PLLP	769	PLLP	OK	StudyAdult.Castelo	-1.61642	0.0765128	-21.1261	5.91e-93	-2.29302	count	1.94303e-88
19784	HECTD3	99	HECTD3	OK	StudyAdult.Castelo	-1.62716	0.264999	-6.1403	9.23e-10	-2.01797	count	2.96726e-05
28682	OTUB1	187	OTUB1	OK	StudyAdult.Castelo	-1.63476	0.210177	-7.778	9.81e-15	-2.12054	count	3.18629e-10
22988	LINC01089	121	LINC01089	OK	StudyAdult.Castelo	-1.63514	0.238291	-6.8619	8.1e-12	-2.05657	count	2.61897e-07
25856	MRPL49	93	MRPL49	OK	StudyAdult.Castelo	-1.64126	0.29827	-5.5026	4.03e-08	-2.00757	count	0.00128835
24953	METTL23	101	METTL23	OK	StudyAdult.Castelo	-1.64347	0.274892	-5.9786	2.49e-09	-1.98002	count	7.99713e-05
33116	REST	105	REST	OK	StudyAdult.Castelo	-1.64513	0.244	-6.7423	1.84e-11	-2.05529	count	5.94246e-07
44642	ZNF506	63	ZNF506	OK	StudyAdult.Castelo	-1.65406	0.341382	-4.8452	1.32e-06	-1.86015	count	0.0418295
41777	UBE2A	140	UBE2A	OK	StudyAdult.Castelo	-1.65736	0.2371	-6.9902	3.32e-12	-2.08103	count	1.07422e-07
14873	DNAJC18	135	DNAJC18	OK	StudyAdult.Castelo	-1.66515	0.222374	-7.4881	8.95e-14	-2.10845	count	2.90302e-09
40085	TMEM205	168	TMEM205	OK	StudyAdult.Castelo	-1.67518	0.213622	-7.8418	5.97e-15	-2.13966	count	1.93971e-10
9524	BLCAP	108	BLCAP	OK	StudyAdult.Castelo	-1.68093	0.308879	-5.442	5.66e-08	-1.95616	count	0.00180809
32693	RAPGEF6	221	RAPGEF6	OK	StudyAdult.Castelo	-1.68246	0.160933	-10.4544	3.48e-25	-2.26978	count	1.13859e-20
29804	PGM3	116	PGM3	OK	StudyAdult.Castelo	-1.68928	0.286774	-5.8906	4.24e-09	-2.02635	count	0.000136053
21686	KCTD1	326	KCTD1	OK	StudyAdult.Castelo	-1.68962	0.133901	-12.6185	1.12e-35	-2.3334	count	3.67382e-31
32480	RABGEF1	157	RABGEF1	OK	StudyAdult.Castelo	-1.69748	0.205655	-8.254	2.2e-16	-2.19605	count	7.16012e-12
13523	CSNK1G1	73	CSNK1G1	OK	StudyAdult.Castelo	-1.69962	0.30772	-5.5233	3.59e-08	-1.97388	count	0.00114805
31871	PSMF1	204	PSMF1	OK	StudyAdult.Castelo	-1.7017	0.190002	-8.9562	5.52e-19	-2.22808	count	1.80046e-14
35918	SHISA2	73	SHISA2	OK	StudyAdult.Castelo	-1.70211	0.300832	-5.658	1.66e-08	-1.94734	count	0.000531615
39437	THAP5	109	THAP5	OK	StudyAdult.Castelo	-1.70289	0.275805	-6.1743	7.47e-10	-2.05953	count	2.4022e-05
30461	PLIN2	78	PLIN2	OK	StudyAdult.Castelo	-1.7134	0.33362	-5.1358	2.97e-07	-1.97751	count	0.00945143
31829	PSMD2	159	PSMD2	OK	StudyAdult.Castelo	-1.71518	0.225162	-7.6175	3.37e-14	-2.18477	count	1.09373e-09
10106	C18orf32	273	C18orf32	OK	StudyAdult.Castelo	-1.72163	0.137558	-12.5156	3.89e-35	-2.35412	count	1.27576e-30
17798	FOXP4	71	FOXP4	OK	StudyAdult.Castelo	-1.72856	0.295867	-5.8424	5.65e-09	-2.01896	count	0.000181229
31448	PRKAR1A	437	PRKAR1A	OK	StudyAdult.Castelo	-1.73129	0.114025	-15.1833	2.31e-50	-2.41648	count	7.58581e-46
33089	RELN	166	RELN	OK	StudyAdult.Castelo	-1.7332	0.182437	-9.5003	3.92e-21	-2.33556	count	1.28023e-16
42917	WDR45	106	WDR45	OK	StudyAdult.Castelo	-1.74123	0.291307	-5.9773	2.51e-09	-2.08507	count	8.06112e-05
12440	CLCC1	167	CLCC1	OK	StudyAdult.Castelo	-1.74157	0.194721	-8.9439	6.16e-19	-2.26646	count	2.00902e-14
9950	C11orf71	97	C11orf71	OK	StudyAdult.Castelo	-1.74193	0.267284	-6.5172	8.27e-11	-2.05645	count	2.66683e-06
16682	FAHD1	84	FAHD1	OK	StudyAdult.Castelo	-1.74662	0.339627	-5.1428	2.87e-07	-1.88671	count	0.00913406
44468	ZNF395	129	ZNF395	OK	StudyAdult.Castelo	-1.77044	0.21515	-8.2289	2.7e-16	-2.29291	count	8.78661e-12
26612	MYO18A	304	MYO18A	OK	StudyAdult.Castelo	-1.77187	0.131588	-13.4653	2.92e-40	-2.44293	count	9.58461e-36
37313	SNX12	61	SNX12	OK	StudyAdult.Castelo	-1.78929	0.342649	-5.2219	1.88e-07	-1.96511	count	0.00598968
29330	PCMTD2	187	PCMTD2	OK	StudyAdult.Castelo	-1.79002	0.198934	-8.9981	3.81e-19	-2.34257	count	1.2429e-14
38003	SSR1	274	SSR1	OK	StudyAdult.Castelo	-1.79895	0.155661	-11.5569	2.63e-30	-2.44386	count	8.61667e-26
13181	COX8A	349	COX8A	OK	StudyAdult.Castelo	-1.80082	0.135419	-13.2981	2.47e-39	-2.46816	count	8.10605e-35
30812	POLR2M	57	POLR2M	OK	StudyAdult.Castelo	-1.80219	0.319018	-5.6492	1.75e-08	-2.07874	count	0.000560333
12476	CLDND1	1325	CLDND1	OK	StudyAdult.Castelo	-1.80421	0.0462535	-39.0071	1.69e-273	-2.58453	count	5.55926e-269
31775	PSMB5	184	PSMB5	OK	StudyAdult.Castelo	-1.80577	0.212416	-8.5011	2.82e-17	-2.29572	count	9.18615e-13
10205	C1orf56	107	C1orf56	OK	StudyAdult.Castelo	-1.81084	0.233161	-7.7665	1.07e-14	-2.31102	count	3.47504e-10
29414	PDCD6	229	PDCD6	OK	StudyAdult.Castelo	-1.81469	0.180235	-10.0685	1.67e-23	-2.42522	count	5.46073e-19
14549	DHX33	68	DHX33	OK	StudyAdult.Castelo	-1.81658	0.341223	-5.3237	1.09e-07	-2.07192	count	0.0034771
32021	PTPMT1	101	PTPMT1	OK	StudyAdult.Castelo	-1.82281	0.348886	-5.2247	1.85e-07	-2.09761	count	0.00589484
30986	PPIA	495	PPIA	OK	StudyAdult.Castelo	-1.82317	0.107134	-17.0176	2.75e-62	-2.54925	count	9.03513e-58
44987	ZNF677	55	ZNF677	OK	StudyAdult.Castelo	-1.83273	0.351758	-5.2102	2e-07	-2.06448	count	0.0063712
28523	OMG	468	OMG	OK	StudyAdult.Castelo	-1.83615	0.108654	-16.899	1.76e-61	-2.5704	count	5.7823e-57
16268	EPM2AIP1	172	EPM2AIP1	OK	StudyAdult.Castelo	-1.85525	0.203792	-9.1036	1.48e-19	-2.39264	count	4.82983e-15
13517	CSNK1D	123	CSNK1D	OK	StudyAdult.Castelo	-1.86596	0.235879	-7.9107	3.48e-15	-2.33949	count	1.131e-10
19598	HARS2	75	HARS2	OK	StudyAdult.Castelo	-1.8674	0.329033	-5.6754	1.5e-08	-2.1478	count	0.00048045
31172	PPP1R8	104	PPP1R8	OK	StudyAdult.Castelo	-1.86933	0.247204	-7.5619	5.13e-14	-2.30767	count	1.66474e-09
38330	STT3A	102	STT3A	OK	StudyAdult.Castelo	-1.87119	0.274374	-6.8198	1.08e-11	-2.16998	count	3.49099e-07
7865	AP3S2	83	AP3S2	OK	StudyAdult.Castelo	-1.87997	0.260701	-7.2112	6.86e-13	-2.30336	count	2.22243e-08
43556	ZBTB47	74	ZBTB47	OK	StudyAdult.Castelo	-1.90872	0.346472	-5.509	3.89e-08	-2.16413	count	0.00124367
17819	FPGT	47	FPGT	OK	StudyAdult.Castelo	-1.91552	0.392628	-4.8787	1.12e-06	-1.9009	count	0.0355107
41138	TRPV3	44	TRPV3	OK	StudyAdult.Castelo	-1.92125	0.376269	-5.1061	3.48e-07	-1.98878	count	0.011072
12968	COMMD3	182	COMMD3	OK	StudyAdult.Castelo	-1.92319	0.214825	-8.9524	5.72e-19	-2.45462	count	1.86558e-14
2204	AC025171.1	38	AC025171.1	OK	StudyAdult.Castelo	-1.92355	0.378649	-5.08	3.99e-07	-2.02657	count	0.0126894
9722	BRD8	390	BRD8	OK	StudyAdult.Castelo	-1.9335	0.119313	-16.2053	7.28e-57	-2.68364	count	2.39119e-52
11327	CCNG1	64	CCNG1	OK	StudyAdult.Castelo	-1.93436	0.311977	-6.2004	6.34e-10	-2.22736	count	2.03951e-05
39947	TMEM14B	168	TMEM14B	OK	StudyAdult.Castelo	-1.93551	0.211738	-9.1411	1.06e-19	-2.48594	count	3.45952e-15
36626	SLC48A1	544	SLC48A1	OK	StudyAdult.Castelo	-1.93757	0.0931325	-20.8045	2.28e-90	-2.72631	count	7.49573e-86
11615	CDH23	81	CDH23	OK	StudyAdult.Castelo	-1.94008	0.266578	-7.2777	4.23e-13	-2.35277	count	1.37082e-08
20012	HIST1H4C	235	HIST1H4C	OK	StudyAdult.Castelo	-1.94918	0.178808	-10.9009	3.34e-27	-2.58997	count	1.09352e-22
11333	CCNH	410	CCNH	OK	StudyAdult.Castelo	-1.95336	0.111783	-17.4745	1.96e-65	-2.71978	count	6.44017e-61
15287	DUSP1	163	DUSP1	OK	StudyAdult.Castelo	-1.95634	0.205557	-9.5173	3.34e-21	-2.50045	count	1.09084e-16
39269	TERF2	111	TERF2	OK	StudyAdult.Castelo	-1.95634	0.251023	-7.7935	8.7e-15	-2.4264	count	2.82602e-10
17564	FILIP1	96	FILIP1	OK	StudyAdult.Castelo	-1.95634	0.242793	-8.0577	1.08e-15	-2.40727	count	3.51184e-11
5033	ADSL	76	ADSL	OK	StudyAdult.Castelo	-1.95634	0.354956	-5.5115	3.83e-08	-2.05126	count	0.00122457
29390	PDAP1	146	PDAP1	OK	StudyAdult.Castelo	-1.96959	0.235451	-8.3652	8.78e-17	-2.45777	count	2.8585e-12
20234	HNRNPU	464	HNRNPU	OK	StudyAdult.Castelo	-1.97555	0.108825	-18.1535	3.1e-70	-2.75797	count	1.01866e-65
13373	CRHBP	60	CRHBP	OK	StudyAdult.Castelo	-1.97615	0.296171	-6.6723	2.95e-11	-2.31816	count	9.52289e-07
11105	CCDC152	189	CCDC152	OK	StudyAdult.Castelo	-1.98452	0.173358	-11.4475	8.9e-30	-2.63957	count	2.91555e-25
20795	IGSF1	48	IGSF1	OK	StudyAdult.Castelo	-1.98913	0.315268	-6.3093	3.18e-10	-2.09314	count	1.0238e-05
43253	YBX3	44	YBX3	OK	StudyAdult.Castelo	-1.99025	0.365837	-5.4402	5.71e-08	-2.07638	count	0.00182395
15989	ELOF1	87	ELOF1	OK	StudyAdult.Castelo	-1.99144	0.380118	-5.239	1.72e-07	-2.05881	count	0.00548164
23141	LINC01554	30	LINC01554	OK	StudyAdult.Castelo	-2.0008	0.408888	-4.8933	1.04e-06	-1.9325	count	0.0329857
25538	MOCS1	61	MOCS1	OK	StudyAdult.Castelo	-2.00286	0.326693	-6.1307	9.8e-10	-2.27782	count	3.15001e-05
8042	ARF3	123	ARF3	OK	StudyAdult.Castelo	-2.0036	0.263205	-7.6123	3.5e-14	-2.439	count	1.13589e-09
39995	TMEM170A	95	TMEM170A	OK	StudyAdult.Castelo	-2.00764	0.338632	-5.9287	3.37e-09	-2.23712	count	0.00010817
7085	ALYREF	41	ALYREF	OK	StudyAdult.Castelo	-2.01041	0.410096	-4.9023	9.94e-07	-1.82115	count	0.0315307
13595	CTDNEP1	167	CTDNEP1	OK	StudyAdult.Castelo	-2.0135	0.190097	-10.592	8.48e-26	-2.64514	count	2.77533e-21
32420	RAB4B	164	RAB4B	OK	StudyAdult.Castelo	-2.01433	0.183496	-10.9775	1.48e-27	-2.67242	count	4.84611e-23
25940	MRPS28	98	MRPS28	OK	StudyAdult.Castelo	-2.01518	0.286928	-7.0233	2.63e-12	-2.17664	count	8.51094e-08
36686	SLC6A9	168	SLC6A9	OK	StudyAdult.Castelo	-2.02884	0.180282	-11.2537	7.51e-29	-2.69121	count	2.45975e-24
31184	PPP2CB	321	PPP2CB	OK	StudyAdult.Castelo	-2.03703	0.132732	-15.347	2.22e-51	-2.8006	count	7.29048e-47
15881	EIF4G1	99	EIF4G1	OK	StudyAdult.Castelo	-2.0415	0.271578	-7.5172	7.19e-14	-2.36033	count	2.33244e-09
24554	MBD1	92	MBD1	OK	StudyAdult.Castelo	-2.0415	0.296452	-6.8865	6.83e-12	-2.36033	count	2.20855e-07
19937	HIGD2A	82	HIGD2A	OK	StudyAdult.Castelo	-2.05165	0.420994	-4.8734	1.15e-06	-2.17342	count	0.0364585
40124	TMEM231	38	TMEM231	OK	StudyAdult.Castelo	-2.0617	0.426936	-4.8291	1.43e-06	-1.88268	count	0.0452967
29627	PEG3	142	PEG3	OK	StudyAdult.Castelo	-2.06701	0.223492	-9.2487	3.99e-20	-2.6599	count	1.30254e-15
28844	PAFAH1B2	316	PAFAH1B2	OK	StudyAdult.Castelo	-2.06809	0.14079	-14.6891	2.39e-47	-2.82247	count	7.84804e-43
34016	RPL15	467	RPL15	OK	StudyAdult.Castelo	-2.07481	0.110268	-18.8161	4.6e-75	-2.89013	count	1.51174e-70
13358	CREG1	171	CREG1	OK	StudyAdult.Castelo	-2.08418	0.195051	-10.6853	3.22e-26	-2.72518	count	1.054e-21
31079	PPP1CB	252	PPP1CB	OK	StudyAdult.Castelo	-2.08472	0.165359	-12.6073	1.29e-35	-2.78893	count	4.23133e-31
12818	COA3	119	COA3	OK	StudyAdult.Castelo	-2.10663	0.299498	-7.0339	2.44e-12	-2.35443	count	7.89633e-08
10985	CC2D1B	61	CC2D1B	OK	StudyAdult.Castelo	-2.11049	0.32563	-6.4813	1.05e-10	-2.34575	count	3.3853e-06
16823	FAM157C	95	FAM157C	OK	StudyAdult.Castelo	-2.12023	0.24681	-8.5905	1.32e-17	-2.6561	count	4.30109e-13
9455	BET1L	56	BET1L	OK	StudyAdult.Castelo	-2.13327	0.352981	-6.0436	1.68e-09	-2.29702	count	5.39633e-05
31964	PTGR2	46	PTGR2	OK	StudyAdult.Castelo	-2.13867	0.42083	-5.082	3.94e-07	-2.18146	count	0.0125312
8168	ARHGEF1	148	ARHGEF1	OK	StudyAdult.Castelo	-2.1505	0.201787	-10.6573	4.31e-26	-2.78774	count	1.41066e-21
40493	TNNI3K	35	TNNI3K	OK	StudyAdult.Castelo	-2.16398	0.405934	-5.3309	1.04e-07	-2.23704	count	0.00331833
37823	SREBF1	211	SREBF1	OK	StudyAdult.Castelo	-2.17561	0.165404	-13.1533	1.53e-38	-2.92887	count	5.02054e-34
27869	NPC2	130	NPC2	OK	StudyAdult.Castelo	-2.1823	0.225481	-9.6784	7.31e-22	-2.73231	count	2.3884e-17
33512	RNASEH1	41	RNASEH1	OK	StudyAdult.Castelo	-2.19273	0.453493	-4.8352	1.39e-06	-1.91858	count	0.0440352
24680	MCRS1	116	MCRS1	OK	StudyAdult.Castelo	-2.19475	0.261645	-8.3883	7.25e-17	-2.62981	count	2.3606e-12
12335	CHURC1	137	CHURC1	OK	StudyAdult.Castelo	-2.19648	0.230707	-9.5207	3.24e-21	-2.74696	count	1.05822e-16
15947	ELK4	64	ELK4	OK	StudyAdult.Castelo	-2.21417	0.307123	-7.2094	6.95e-13	-2.45307	count	2.25152e-08
13121	COX16	115	COX16	OK	StudyAdult.Castelo	-2.22261	0.249643	-8.9032	8.82e-19	-2.71942	count	2.87611e-14
41435	TTLL3	63	TTLL3	OK	StudyAdult.Castelo	-2.22461	0.302013	-7.3659	2.22e-13	-2.53766	count	7.19746e-09
74	AAR2	75	AAR2	OK	StudyAdult.Castelo	-2.22964	0.347686	-6.4128	1.63e-10	-2.48891	count	5.25219e-06
24101	MAFB	33	MAFB	OK	StudyAdult.Castelo	-2.23078	0.439178	-5.0794	4e-07	-2.12515	count	0.0127208
44891	ZNF619	38	ZNF619	OK	StudyAdult.Castelo	-2.23078	0.403437	-5.5294	3.47e-08	-2.12515	count	0.00110984
25559	MON1B	61	MON1B	OK	StudyAdult.Castelo	-2.23593	0.330958	-6.7559	1.67e-11	-2.43148	count	5.3946e-07
9374	BCL2L2	49	BCL2L2	OK	StudyAdult.Castelo	-2.23665	0.354681	-6.3061	3.25e-10	-2.48285	count	1.0463e-05
8945	ATP6V1G2	102	ATP6V1G2	OK	StudyAdult.Castelo	-2.23665	0.417321	-5.3595	8.92e-08	-2.48285	count	0.00284744
23126	LINC01505	48	LINC01505	OK	StudyAdult.Castelo	-2.24403	0.343127	-6.5399	7.12e-11	-2.42371	count	2.29641e-06
20657	IER5	65	IER5	OK	StudyAdult.Castelo	-2.25862	0.330212	-6.8399	9.42e-12	-2.51202	count	3.04539e-07
9608	BMX	33	BMX	OK	StudyAdult.Castelo	-2.25862	0.463006	-4.8782	1.12e-06	-2.08469	count	0.0355107
15068	DPH1	31	DPH1	OK	StudyAdult.Castelo	-2.27	0.467651	-4.8541	1.27e-06	-2.17415	count	0.0402527
22379	LACC1	64	LACC1	OK	StudyAdult.Castelo	-2.27682	0.329365	-6.9127	5.69e-12	-2.67707	count	1.84003e-07
20603	ID1	52	ID1	OK	StudyAdult.Castelo	-2.27912	0.450012	-5.0646	4.32e-07	-2.25167	count	0.0137341
29936	PHKG2	51	PHKG2	OK	StudyAdult.Castelo	-2.27912	0.459098	-4.9643	7.25e-07	-2.25167	count	0.0230173
15410	DYRK4	79	DYRK4	OK	StudyAdult.Castelo	-2.28013	0.302256	-7.5437	5.89e-14	-2.54062	count	1.91107e-09
22652	LHPP	356	LHPP	OK	StudyAdult.Castelo	-2.28154	0.123007	-18.548	4.29e-73	-3.15084	count	1.40978e-68
26903	NBL1	45	NBL1	OK	StudyAdult.Castelo	-2.28177	0.322858	-7.0674	1.92e-12	-2.38925	count	6.21504e-08
8498	ASB3	120	ASB3	OK	StudyAdult.Castelo	-2.28553	0.239866	-9.5284	3.01e-21	-2.80589	count	9.83126e-17
10973	CBX7	150	CBX7	OK	StudyAdult.Castelo	-2.29705	0.189399	-12.1281	3.84e-33	-3.00118	count	1.25891e-28
27113	NDUFA7	113	NDUFA7	OK	StudyAdult.Castelo	-2.30774	0.305831	-7.5458	5.8e-14	-2.63606	count	1.88198e-09
40859	TRAPPC4	118	TRAPPC4	OK	StudyAdult.Castelo	-2.32791	0.289228	-8.0487	1.16e-15	-2.68925	count	3.77186e-11
17723	FNIP1	182	FNIP1	OK	StudyAdult.Castelo	-2.32986	0.195272	-11.9313	3.76e-32	-3.06029	count	1.23245e-27
31409	PRH1	239	PRH1	OK	StudyAdult.Castelo	-2.33248	0.147624	-15.8001	3.04e-54	-3.1715	count	9.98427e-50
38252	STMN1	712	STMN1	OK	StudyAdult.Castelo	-2.34698	0.0782241	-30.0033	7.24e-175	-3.318	count	2.38145e-170
19214	GRIN2A	165	GRIN2A	OK	StudyAdult.Castelo	-2.35123	0.190693	-12.3299	3.57e-34	-3.06001	count	1.1706e-29
40832	TRAPPC1	112	TRAPPC1	OK	StudyAdult.Castelo	-2.35166	0.315587	-7.4517	1.17e-13	-2.61965	count	3.79443e-09
13115	COX14	98	COX14	OK	StudyAdult.Castelo	-2.35323	0.326631	-7.2045	7.2e-13	-2.71064	count	2.33237e-08
35558	SERINC3	248	SERINC3	OK	StudyAdult.Castelo	-2.36677	0.161908	-14.618	6.37e-47	-3.16924	count	2.09165e-42
44120	ZNF195	142	ZNF195	OK	StudyAdult.Castelo	-2.37862	0.229731	-10.3539	9.67e-25	-2.93428	count	3.16354e-20
14267	DDX3X	192	DDX3X	OK	StudyAdult.Castelo	-2.39245	0.214541	-11.1515	2.28e-28	-3.04304	count	7.46632e-24
44276	ZNF275	74	ZNF275	OK	StudyAdult.Castelo	-2.39984	0.291997	-8.2187	2.93e-16	-2.82261	count	9.53451e-12
10262	C22orf39	71	C22orf39	OK	StudyAdult.Castelo	-2.43592	0.492737	-4.9436	8.05e-07	-2.10794	count	0.0255547
37577	SPATA13	199	SPATA13	OK	StudyAdult.Castelo	-2.44257	0.186725	-13.0811	3.79e-38	-3.22156	count	1.24361e-33
29663	PET117	55	PET117	OK	StudyAdult.Castelo	-2.45104	0.358961	-6.8282	1.02e-11	-2.58637	count	3.29735e-07
38021	SSSCA1	45	SSSCA1	OK	StudyAdult.Castelo	-2.45278	0.455931	-5.3797	7.99e-08	-2.18437	count	0.00255113
33299	RGS2	98	RGS2	OK	StudyAdult.Castelo	-2.45278	0.300976	-8.1494	5.16e-16	-2.8832	count	1.6786e-11
30416	PLEKHB2	198	PLEKHB2	OK	StudyAdult.Castelo	-2.4563	0.199314	-12.3238	3.84e-34	-3.12754	count	1.2591e-29
32501	RABL6	98	RABL6	OK	StudyAdult.Castelo	-2.45782	0.295346	-8.3218	1.26e-16	-2.90174	count	4.10168e-12
30785	POLR2E	145	POLR2E	OK	StudyAdult.Castelo	-2.47514	0.261221	-9.4752	4.95e-21	-2.99673	count	1.61647e-16
21899	KIAA1217	259	KIAA1217	OK	StudyAdult.Castelo	-2.50147	0.146471	-17.0783	1.06e-62	-3.38292	count	3.48274e-58
39065	TCEAL3	113	TCEAL3	OK	StudyAdult.Castelo	-2.50545	0.284506	-8.8063	2.06e-18	-2.94299	count	6.71601e-14
13310	CRAMP1	32	CRAMP1	OK	StudyAdult.Castelo	-2.53171	0.479539	-5.2795	1.38e-07	-2.46865	count	0.00440041
31733	PSMA1	131	PSMA1	OK	StudyAdult.Castelo	-2.53508	0.300186	-8.445	4.51e-17	-2.92962	count	1.46882e-12
38465	SUMO2	211	SUMO2	OK	StudyAdult.Castelo	-2.53716	0.209804	-12.093	5.77e-33	-3.2675	count	1.89152e-28
16994	FAM221A	150	FAM221A	OK	StudyAdult.Castelo	-2.54413	0.223486	-11.3839	1.8e-29	-3.23039	count	5.89644e-25
44624	ZNF493	136	ZNF493	OK	StudyAdult.Castelo	-2.55335	0.242127	-10.5455	1.37e-25	-3.1835	count	4.48319e-21
22124	KLHL11	52	KLHL11	OK	StudyAdult.Castelo	-2.55418	0.420971	-6.0674	1.45e-09	-2.63807	count	4.65856e-05
884	AC007364.1	24	AC007364.1	OK	StudyAdult.Castelo	-2.55418	0.522766	-4.8859	1.08e-06	-2.12118	count	0.03425
39542	TIA1	214	TIA1	OK	StudyAdult.Castelo	-2.55824	0.199777	-12.8055	1.15e-36	-3.32075	count	3.77292e-32
28520	OMA1	93	OMA1	OK	StudyAdult.Castelo	-2.55852	0.257226	-9.9466	5.53e-23	-3.07274	count	1.80798e-18
37043	SNAI1	29	SNAI1	OK	StudyAdult.Castelo	-2.58887	0.444426	-5.8252	6.26e-09	-2.5004	count	0.000200752
20978	INO80C	39	INO80C	OK	StudyAdult.Castelo	-2.5982	0.5131	-5.0637	4.34e-07	-2.09718	count	0.0137973
22073	KLF13	324	KLF13	OK	StudyAdult.Castelo	-2.5982	0.133872	-19.408	1.71e-79	-3.56618	count	5.62077e-75
37466	SOX10	520	SOX10	OK	StudyAdult.Castelo	-2.60423	0.099705	-26.1194	1.02e-136	-3.65162	count	3.35488e-132
33038	RDH5	30	RDH5	OK	StudyAdult.Castelo	-2.61559	0.477572	-5.4769	4.66e-08	-2.44036	count	0.0014892
43085	WRB	215	WRB	OK	StudyAdult.Castelo	-2.62623	0.196115	-13.3913	7.53e-40	-3.4202	count	2.4715e-35
44810	ZNF585A	80	ZNF585A	OK	StudyAdult.Castelo	-2.63007	0.361841	-7.2686	4.53e-13	-2.84917	count	1.46795e-08
24536	MATR3	290	MATR3	OK	StudyAdult.Castelo	-2.63022	0.159476	-16.4929	9.28e-59	-3.5377	count	3.04848e-54
31856	PSMD9	96	PSMD9	OK	StudyAdult.Castelo	-2.6321	0.317828	-8.2815	1.75e-16	-2.92059	count	5.69625e-12
27452	NFS1	66	NFS1	OK	StudyAdult.Castelo	-2.63374	0.328051	-8.0284	1.36e-15	-2.98197	count	4.42177e-11
15395	DYNLT3	39	DYNLT3	OK	StudyAdult.Castelo	-2.64949	0.529981	-4.9992	6.06e-07	-2.07144	count	0.0192478
29702	PEX5	61	PEX5	OK	StudyAdult.Castelo	-2.67196	0.356903	-7.4865	9.05e-14	-2.79352	count	2.93537e-09
32906	RBM34	81	RBM34	OK	StudyAdult.Castelo	-2.67547	0.488353	-5.4786	4.61e-08	-2.69425	count	0.00147326
16271	EPN1	70	EPN1	OK	StudyAdult.Castelo	-2.67848	0.379003	-7.0672	1.93e-12	-2.61603	count	6.24722e-08
39074	TCEAL6	88	TCEAL6	OK	StudyAdult.Castelo	-2.68339	0.300388	-8.9331	6.78e-19	-2.98991	count	2.21109e-14
14126	DCTN1	245	DCTN1	OK	StudyAdult.Castelo	-2.68514	0.176968	-15.173	2.68e-50	-3.60268	count	8.80058e-46
16502	EVI2A	438	EVI2A	OK	StudyAdult.Castelo	-2.68781	0.109044	-24.6489	3.67e-123	-3.73892	count	1.20703e-118
9509	BIRC3	39	BIRC3	OK	StudyAdult.Castelo	-2.69828	0.419856	-6.4267	1.49e-10	-2.76124	count	4.80167e-06
40322	TMEM80	68	TMEM80	OK	StudyAdult.Castelo	-2.71545	0.344753	-7.8765	4.55e-15	-2.85129	count	1.47861e-10
39587	TIMM10B	72	TIMM10B	OK	StudyAdult.Castelo	-2.72181	0.388092	-7.0133	2.82e-12	-2.7923	count	9.12552e-08
8636	ATAT1	196	ATAT1	OK	StudyAdult.Castelo	-2.73448	0.216927	-12.6055	1.31e-35	-3.44994	count	4.2968e-31
26549	MYDGF	99	MYDGF	OK	StudyAdult.Castelo	-2.76197	0.377844	-7.3098	3.35e-13	-2.88048	count	1.08587e-08
30557	PLXNB3	376	PLXNB3	OK	StudyAdult.Castelo	-2.77991	0.125818	-22.0947	6.36e-101	-3.83517	count	2.09136e-96
15902	EIF5AL1	62	EIF5AL1	OK	StudyAdult.Castelo	-2.79259	0.445994	-6.2615	4.31e-10	-2.55231	count	1.38713e-05
14834	DNAJB4	74	DNAJB4	OK	StudyAdult.Castelo	-2.81939	0.321531	-8.7686	2.86e-18	-3.12902	count	9.32274e-14
38564	SWAP70	467	SWAP70	OK	StudyAdult.Castelo	-2.82995	0.106615	-26.5436	1.01e-140	-3.94853	count	3.32209e-136
15587	EEF1E1	67	EEF1E1	OK	StudyAdult.Castelo	-2.8879	0.447309	-6.4562	1.23e-10	-2.67447	count	3.96491e-06
34022	RPL17	152	RPL17	OK	StudyAdult.Castelo	-2.89244	0.318757	-9.0741	1.93e-19	-3.46346	count	6.29778e-15
27767	NOMO1	117	NOMO1	OK	StudyAdult.Castelo	-2.90219	0.285766	-10.1559	7.04e-24	-3.47701	count	2.3025e-19
35900	SHB	38	SHB	OK	StudyAdult.Castelo	-2.91186	0.498789	-5.8379	5.81e-09	-2.82274	count	0.000186356
9551	BLOC1S6	99	BLOC1S6	OK	StudyAdult.Castelo	-2.94373	0.399829	-7.3625	2.27e-13	-3.04971	count	7.35911e-09
20759	IFT80	98	IFT80	OK	StudyAdult.Castelo	-2.94847	0.300039	-9.827	1.76e-22	-3.43147	count	5.75221e-18
10667	CALM2	702	CALM2	OK	StudyAdult.Castelo	-2.9621	0.0783509	-37.8055	1.08e-259	-4.18564	count	3.55255e-255
8921	ATP6V1B2	127	ATP6V1B2	OK	StudyAdult.Castelo	-2.97328	0.281832	-10.5498	1.31e-25	-3.48358	count	4.28698e-21
43739	ZDHHC8	52	ZDHHC8	OK	StudyAdult.Castelo	-2.98085	0.469431	-6.3499	2.45e-10	-2.85674	count	7.89096e-06
14582	DIABLO	85	DIABLO	OK	StudyAdult.Castelo	-2.98085	0.473559	-6.2946	3.49e-10	-2.85674	count	1.12354e-05
24308	MAP3K12	123	MAP3K12	OK	StudyAdult.Castelo	-2.99042	0.240608	-12.4286	1.1e-34	-3.69404	count	3.60723e-30
34295	RPP21	66	RPP21	OK	StudyAdult.Castelo	-2.99244	0.347521	-8.6108	1.11e-17	-3.22358	count	3.61705e-13
16346	ERF	61	ERF	OK	StudyAdult.Castelo	-3.00089	0.432027	-6.9461	4.51e-12	-3.1264	count	1.45876e-07
17318	FBXO16	61	FBXO16	OK	StudyAdult.Castelo	-3.00617	0.358799	-8.3784	7.87e-17	-3.20834	count	2.56231e-12
25799	MRPL32	76	MRPL32	OK	StudyAdult.Castelo	-3.02898	0.48821	-6.2043	6.19e-10	-2.85757	count	1.99132e-05
191	ABCF3	52	ABCF3	OK	StudyAdult.Castelo	-3.05496	0.480692	-6.3553	2.37e-10	-2.82277	count	7.63353e-06
26963	NCDN	105	NCDN	OK	StudyAdult.Castelo	-3.0682	0.346931	-8.8438	1.48e-18	-3.41715	count	4.82569e-14
31751	PSMA6	126	PSMA6	OK	StudyAdult.Castelo	-3.06999	0.341465	-8.9907	4.07e-19	-3.32901	count	1.32763e-14
33029	RDH11	217	RDH11	OK	StudyAdult.Castelo	-3.10714	0.224287	-13.8534	1.89e-42	-3.93057	count	6.20468e-38
17627	FLCN	42	FLCN	OK	StudyAdult.Castelo	-3.12641	0.487872	-6.4083	1.68e-10	-2.6575	count	5.41296e-06
43988	ZMYM6	29	ZMYM6	OK	StudyAdult.Castelo	-3.14593	0.541595	-5.8086	6.9e-09	-2.44781	count	0.000221235
5384	AKT1S1	38	AKT1S1	OK	StudyAdult.Castelo	-3.14593	0.589869	-5.3333	1.03e-07	-2.44781	count	0.00328683
29222	PCDHGA1	75	PCDHGA1	OK	StudyAdult.Castelo	-3.16416	0.337625	-9.3718	1.29e-20	-3.57613	count	4.21185e-16
32432	RAB5C	85	RAB5C	OK	StudyAdult.Castelo	-3.16618	0.406552	-7.7879	9.09e-15	-3.26203	count	2.95261e-10
20024	HIST2H2BE	142	HIST2H2BE	OK	StudyAdult.Castelo	-3.17685	0.267382	-11.8813	6.68e-32	-3.80047	count	2.1893e-27
7217	ANKHD1	94	ANKHD1	OK	StudyAdult.Castelo	-3.19182	0.365464	-8.7336	3.87e-18	-3.58717	count	1.26139e-13
22406	LAMTOR1	137	LAMTOR1	OK	StudyAdult.Castelo	-3.19806	0.338268	-9.4542	6.02e-21	-3.62295	count	1.96577e-16
35519	SEPHS2	40	SEPHS2	OK	StudyAdult.Castelo	-3.20911	0.612553	-5.2389	1.72e-07	-2.65263	count	0.00548164
9338	BCKDHA	85	BCKDHA	OK	StudyAdult.Castelo	-3.21859	0.419298	-7.6761	2.15e-14	-3.22978	count	6.97997e-10
23795	LRRC59	37	LRRC59	OK	StudyAdult.Castelo	-3.22485	0.586808	-5.4956	4.19e-08	-2.78322	count	0.00133925
27890	NPHP3	165	NPHP3	OK	StudyAdult.Castelo	-3.22546	0.226362	-14.2491	9.73e-45	-4.06342	count	3.19475e-40
14264	DDX39B	138	DDX39B	OK	StudyAdult.Castelo	-3.25563	0.245375	-13.2679	3.61e-39	-4.06707	count	1.18469e-34
4871	ADAMTSL1	22	ADAMTSL1	OK	StudyAdult.Castelo	-3.26853	0.677269	-4.826	1.46e-06	-2.60008	count	0.0462426
43907	ZHX1	65	ZHX1	OK	StudyAdult.Castelo	-3.27365	0.453584	-7.2173	6.57e-13	-3.30385	count	2.12855e-08
13904	CYP51A1	179	CYP51A1	OK	StudyAdult.Castelo	-3.2781	0.248763	-13.1776	1.13e-38	-4.00254	count	3.70809e-34
12533	CLK3	84	CLK3	OK	StudyAdult.Castelo	-3.2781	0.353196	-9.2812	2.97e-20	-3.54212	count	9.69616e-16
17702	FN3KRP	116	FN3KRP	OK	StudyAdult.Castelo	-3.32395	0.311528	-10.6698	3.78e-26	-3.82333	count	1.23727e-21
13154	COX6A1	161	COX6A1	OK	StudyAdult.Castelo	-3.33398	0.310642	-10.7325	1.97e-26	-3.88525	count	6.44879e-22
26480	MUS81	86	MUS81	OK	StudyAdult.Castelo	-3.34264	0.36304	-9.2073	5.82e-20	-3.59069	count	1.89959e-15
40016	TMEM179	40	TMEM179	OK	StudyAdult.Castelo	-3.34264	0.583006	-5.7335	1.07e-08	-2.36259	count	0.000342882
38675	SYT16	219	SYT16	OK	StudyAdult.Castelo	-3.38286	0.192584	-17.5657	4.54e-66	-4.39787	count	1.4918e-61
14006	DAZAP2	246	DAZAP2	OK	StudyAdult.Castelo	-3.38976	0.201842	-16.7941	8.99e-61	-4.33855	count	2.95348e-56
25793	MRPL30	75	MRPL30	OK	StudyAdult.Castelo	-3.40718	0.443821	-7.6769	2.14e-14	-3.48456	count	6.94772e-10
42443	VAMP2	449	VAMP2	OK	StudyAdult.Castelo	-3.43445	0.137561	-24.9667	4.78e-126	-4.70644	count	1.57214e-121
42095	UNC13D	279	UNC13D	OK	StudyAdult.Castelo	-3.43795	0.175825	-19.5532	1.35e-80	-4.60153	count	4.43758e-76
29753	PFN2	182	PFN2	OK	StudyAdult.Castelo	-3.45683	0.272883	-12.6678	6.18e-36	-4.1006	count	2.02729e-31
38792	TAF9	87	TAF9	OK	StudyAdult.Castelo	-3.47269	0.472134	-7.3553	2.4e-13	-3.10554	count	7.78032e-09
36350	SLC26A2	31	SLC26A2	OK	StudyAdult.Castelo	-3.4824	0.658784	-5.2861	1.33e-07	-2.53285	count	0.0042411
23990	LYNX1	34	LYNX1	OK	StudyAdult.Castelo	-3.54046	0.624022	-5.6736	1.52e-08	-3.07948	count	0.000486841
37895	SRPK3	299	SRPK3	OK	StudyAdult.Castelo	-3.55094	0.165471	-21.4595	1.14e-95	-4.76309	count	3.74855e-91
30302	PLA2G4B	42	PLA2G4B	OK	StudyAdult.Castelo	-3.60927	0.436542	-8.2678	1.96e-16	-3.28631	count	6.37941e-12
26225	MTG1	101	MTG1	OK	StudyAdult.Castelo	-3.6109	0.466654	-7.7379	1.34e-14	-3.63589	count	4.35138e-10
8666	ATF7	68	ATF7	OK	StudyAdult.Castelo	-3.66806	0.451861	-8.1177	6.67e-16	-3.71395	count	2.16955e-11
10349	C4orf45	124	C4orf45	OK	StudyAdult.Castelo	-3.67045	0.344199	-10.6637	4.03e-26	-4.35692	count	1.31906e-21
22760	LINC00324	15	LINC00324	OK	StudyAdult.Castelo	-3.69094	0.674345	-5.4734	4.75e-08	-2.25988	count	0.00151786
22595	LEPROT	83	LEPROT	OK	StudyAdult.Castelo	-3.69681	0.555851	-6.6507	3.41e-11	-3.50631	count	1.10065e-06
12224	CHMP1B	115	CHMP1B	OK	StudyAdult.Castelo	-3.7283	0.39259	-9.4967	4.05e-21	-4.03223	count	1.32265e-16
7001	ALDOC	169	ALDOC	OK	StudyAdult.Castelo	-3.78505	0.27306	-13.8616	1.7e-42	-4.56292	count	5.5811e-38
31181	PPP2CA	191	PPP2CA	OK	StudyAdult.Castelo	-3.79689	0.304231	-12.4803	5.94e-35	-4.558	count	1.94802e-30
35123	SCHIP1	244	SCHIP1	OK	StudyAdult.Castelo	-3.81831	0.198575	-19.2285	3.86e-78	-4.93203	count	1.26874e-73
17600	FKBP4	142	FKBP4	OK	StudyAdult.Castelo	-3.84341	0.390776	-9.8353	1.63e-22	-4.32618	count	5.32766e-18
38786	TAF7	189	TAF7	OK	StudyAdult.Castelo	-3.859	0.288647	-13.3693	9.98e-40	-4.57361	count	3.27544e-35
27902	NPIPA5	132	NPIPA5	OK	StudyAdult.Castelo	-3.86058	0.316135	-12.2118	1.44e-33	-4.38888	count	4.72118e-29
20567	HYPK	40	HYPK	OK	StudyAdult.Castelo	-3.92246	0.579318	-6.7708	1.51e-11	-3.44915	count	4.87881e-07
32960	RBMXL1	63	RBMXL1	OK	StudyAdult.Castelo	-3.93735	0.769056	-5.1197	3.24e-07	-2.86732	count	0.01031
26378	MTRNR2L1	119	MTRNR2L1	OK	StudyAdult.Castelo	-3.94341	0.39744	-9.922	7.02e-23	-4.33192	count	2.29484e-18
35258	SDHAF2	49	SDHAF2	OK	StudyAdult.Castelo	-3.94877	0.637393	-6.1952	6.55e-10	-2.56867	count	2.10681e-05
35981	SHROOM3	36	SHROOM3	OK	StudyAdult.Castelo	-4.06656	0.652694	-6.2304	5.25e-10	-3.03262	count	1.68945e-05
32894	RBM27	61	RBM27	OK	StudyAdult.Castelo	-4.10811	0.563793	-7.2865	3.97e-13	-3.33369	count	1.28668e-08
19619	HAUS4	45	HAUS4	OK	StudyAdult.Castelo	-4.17555	0.7047	-5.9253	3.44e-09	-3.42305	count	0.000110414
37871	SRP19	99	SRP19	OK	StudyAdult.Castelo	-4.22994	0.568656	-7.4385	1.3e-13	-3.86452	count	4.21551e-09
38303	STRADA	92	STRADA	OK	StudyAdult.Castelo	-4.23873	0.589442	-7.1911	7.94e-13	-4.24848	count	2.572e-08
41201	TSIX	54	TSIX	OK	StudyAdult.Castelo	-4.25893	0.497916	-8.5535	1.81e-17	-3.73637	count	5.89716e-13
41171	TSC22D4	391	TSC22D4	OK	StudyAdult.Castelo	-4.2778	0.18246	-23.4451	1.82e-112	-5.65084	count	5.98562e-108
24188	MAMDC4	53	MAMDC4	OK	StudyAdult.Castelo	-4.27873	0.729844	-5.8625	5.01e-09	-3.56069	count	0.000160726
38876	TAS2R14	31	TAS2R14	OK	StudyAdult.Castelo	-4.35424	0.623842	-6.9797	3.57e-12	-3.07851	count	1.155e-07
11996	CERS2	181	CERS2	OK	StudyAdult.Castelo	-4.35856	0.354217	-12.3048	4.8e-34	-5.0918	count	1.57382e-29
21749	KDELR2	144	KDELR2	OK	StudyAdult.Castelo	-4.37873	0.43226	-10.1299	9.12e-24	-4.53866	count	2.9826e-19
38624	SYNGR2	138	SYNGR2	OK	StudyAdult.Castelo	-4.40488	0.420414	-10.4775	2.75e-25	-4.80676	count	8.99828e-21
40427	TMX2	144	TMX2	OK	StudyAdult.Castelo	-4.41308	0.456983	-9.657	8.96e-22	-4.67207	count	2.92723e-17
28367	NUP62	77	NUP62	OK	StudyAdult.Castelo	-4.44125	0.640067	-6.9387	4.75e-12	-3.52417	count	1.53629e-07
39185	TEAD4	57	TEAD4	OK	StudyAdult.Castelo	-4.46865	0.629209	-7.102	1.5e-12	-4.02197	count	4.85655e-08
41210	TSNAX	83	TSNAX	OK	StudyAdult.Castelo	-4.46865	0.541686	-8.2495	2.28e-16	-4.02197	count	7.42026e-12
8402	ARPC4	109	ARPC4	OK	StudyAdult.Castelo	-4.46865	0.549643	-8.1301	6.03e-16	-4.02197	count	1.96144e-11
38345	STX16	144	STX16	OK	StudyAdult.Castelo	-4.4728	0.444215	-10.069	1.66e-23	-4.83285	count	5.4282e-19
44945	ZNF655	110	ZNF655	OK	StudyAdult.Castelo	-4.54973	0.511155	-8.9009	9e-19	-4.44865	count	2.93472e-14
7844	AP2M1	162	AP2M1	OK	StudyAdult.Castelo	-4.55491	0.489017	-9.3144	2.19e-20	-4.5805	count	7.14991e-16
27278	NEDD8	143	NEDD8	OK	StudyAdult.Castelo	-4.60555	0.447476	-10.2923	1.8e-24	-4.3814	count	5.88852e-20
19931	HIGD1A	121	HIGD1A	OK	StudyAdult.Castelo	-4.61893	0.544911	-8.4765	3.47e-17	-4.22854	count	1.13021e-12
32228	PYCR2	97	PYCR2	OK	StudyAdult.Castelo	-4.62555	0.655064	-7.0612	2.01e-12	-4.40916	count	6.50577e-08
11675	CDK2AP1	124	CDK2AP1	OK	StudyAdult.Castelo	-4.64759	0.600417	-7.7406	1.31e-14	-4.58503	count	4.25409e-10
35357	SEC24D	297	SEC24D	OK	StudyAdult.Castelo	-4.67415	0.23326	-20.0384	2.49e-84	-5.88906	count	8.18563e-80
12374	CIPC	101	CIPC	OK	StudyAdult.Castelo	-4.72893	0.597139	-7.9193	3.25e-15	-4.69874	count	1.05628e-10
26387	MTRNR2L12	111	MTRNR2L12	OK	StudyAdult.Castelo	-4.7597	0.544028	-8.749	3.39e-18	-4.97721	count	1.105e-13
12098	CFL1	404	CFL1	OK	StudyAdult.Castelo	-4.78023	0.224234	-21.3181	1.63e-94	-6.11013	count	5.35944e-90
13670	CTSD	179	CTSD	OK	StudyAdult.Castelo	-4.80705	0.486223	-9.8865	9.91e-23	-5.04396	count	3.23928e-18
15518	EDC4	68	EDC4	OK	StudyAdult.Castelo	-4.84672	0.758186	-6.3925	1.86e-10	-3.72774	count	5.99218e-06
27665	NME2	30	NME2	OK	StudyAdult.Castelo	-5.00087	0.765998	-6.5286	7.67e-11	-3.4404	count	2.47365e-06
10601	CACNA2D4	21	CACNA2D4	OK	StudyAdult.Castelo	-5.00087	1.02649	-4.8718	1.16e-06	-2.60838	count	0.036772
20246	HOGA1	22	HOGA1	OK	StudyAdult.Castelo	-5.09184	1.03861	-4.9026	9.92e-07	-2.71963	count	0.0314682
29078	PBX4	212	PBX4	OK	StudyAdult.Castelo	-5.11171	0.442153	-11.561	2.51e-30	-5.7382	count	8.22376e-26
41804	UBE2F	67	UBE2F	OK	StudyAdult.Castelo	-5.15502	0.774412	-6.6567	3.27e-11	-3.64496	count	1.05549e-06
10082	C17orf49	68	C17orf49	OK	StudyAdult.Castelo	-5.17522	0.797211	-6.4917	9.78e-11	-4.52486	count	3.15346e-06
17759	FOSB	37	FOSB	OK	StudyAdult.Castelo	-5.21444	1.07691	-4.842	1.35e-06	-2.8719	count	0.042772
410	AC004593.3	184	AC004593.3	OK	StudyAdult.Castelo	-5.25554	0.392357	-13.3948	7.21e-40	-5.77739	count	2.36654e-35
32387	RAB37	85	RAB37	OK	StudyAdult.Castelo	-5.29744	0.617555	-8.5781	1.47e-17	-4.69486	count	4.78955e-13
18116	GABARAP	320	GABARAP	OK	StudyAdult.Castelo	-5.31932	0.408563	-13.0196	8.17e-38	-6.22898	count	2.68066e-33
20813	IKBIP	361	IKBIP	OK	StudyAdult.Castelo	-5.35037	0.280937	-19.0448	9.21e-77	-6.72732	count	3.02714e-72
11771	CDRT4	29	CDRT4	OK	StudyAdult.Castelo	-5.35754	1.03317	-5.1855	2.29e-07	-3.05275	count	0.00729228
44492	ZNF410	58	ZNF410	OK	StudyAdult.Castelo	-5.39033	1.03969	-5.1846	2.3e-07	-3.09463	count	0.00732389
13814	CYB561D2	37	CYB561D2	OK	StudyAdult.Castelo	-5.39033	1.0459	-5.1538	2.7e-07	-3.09463	count	0.0085941
31928	PTCH2	244	PTCH2	OK	StudyAdult.Castelo	-5.40897	0.400389	-13.5093	1.66e-40	-6.08366	count	5.44895e-36
32045	PTPN22	30	PTPN22	OK	StudyAdult.Castelo	-5.53986	1.02746	-5.3918	7.47e-08	-3.28754	count	0.00238525
27095	NDUFA13	131	NDUFA13	OK	StudyAdult.Castelo	-5.63264	0.988368	-5.6989	1.31e-08	-4.29258	count	0.000419672
41072	TRMT2B	416	TRMT2B	OK	StudyAdult.Castelo	-5.82615	0.248828	-23.4143	3.38e-112	-7.45973	count	1.11158e-107
44954	ZNF664	94	ZNF664	OK	StudyAdult.Castelo	-6.77663	1.05976	-6.3945	1.84e-10	-4.96685	count	5.92793e-06
