# Supplementary material for: Single-cell profiling of human subventricular zone progenitors identifies SFRP1 as a target to re-activate progenitors
Source: Nat Commun. 2022 Feb 24;13:1036. doi: 10.1038/s41467-022-28626-9 (PMC8873234; doi:10.1038/s41467-022-28626-9)
Supplement: Supplementary file 7 — Supplementary Data 5 [file 41467_2022_28626_MOESM7_ESM.xlsx]

## Sheet: Sheet1
NBB number	Sex	Age (yrs)	Diagnosis	Braak stage Tangles	Braak stage amyloid	PMD (h:min)	pH CSF	Brain weight (gr)
2008-052	f	62	Cntr	1	B	07:55:00	6.4	1115
2008-073	f	50	Cntr	1	O	04:10:00	6.98	1332
2008-054	f	92	Cntr	1	A	07:00:00	6.55	1230
2009-005	m	82	Cntr	1	O	05:10:00	6.75	1087
2009-021	f	99	Cntr	2	C	04:15:00	6.63	910
