# Supplementary material for: Single-cell profiling of human subventricular zone progenitors identifies SFRP1 as a target to re-activate progenitors
Source: Nat Commun. 2022 Feb 24;13:1036. doi: 10.1038/s41467-022-28626-9 (PMC8873234; doi:10.1038/s41467-022-28626-9)
Supplement: Supplementary file 8 — Supplementary Data 6 [file 41467_2022_28626_MOESM8_ESM.xlsx]

## Sheet: Sheet1
number	Sex	GW	Diagnosis	PMD (h:min)
222	f	9	No structural and chromosomal abnormalities	00:56:00
285	f	9	No structural and chromosomal abnormalities	01:17:00
367	m	9	No structural and chromosomal abnormalities	01:13:00
490	m	16	No structural and chromosomal abnormalities	00:34:00
532	f	16	No structural and chromosomal abnormalities	00:53:00
370	f	17	No structural and chromosomal abnormalities	00:42:00
M53	m	17	No structural and chromosomal abnormalities	01:40:00
