# Supplementary material for: Single-cell profiling of human subventricular zone progenitors identifies SFRP1 as a target to re-activate progenitors
Source: Nat Commun. 2022 Feb 24;13:1036. doi: 10.1038/s41467-022-28626-9 (PMC8873234; doi:10.1038/s41467-022-28626-9)
Supplement: Supplementary file 9 — Supplementary Data 7 [file 41467_2022_28626_MOESM9_ESM.xlsx]

## Sheet: Sheet1
qPCR primers
Gene	Forward primer (5’-3’)	Reverse primer (5’-3’)
Ccnd111	CCCACGATTTCATCGAACAC	AAATGAACTTCACATCTGTGGC
Ccnd2	AGAACCTGTTGACCATCGAG	CTCACAGACCTCTAGCATCC
Ctnnb1	CCACAGGATTACAAGAAGCGG	CAAGATCTGCAGTCTCATTCCA
Fzd5	TTTCTTGTCGCCAAAGTCCA	TCCCTACCCTTCTTTACTGTC
Fzd7	ATCTGGTGGGTCATTCTGTC	AGATGAAAGTACTGCGAGTTGG
Hes5	AAGAGCCTGCACCAGGACTA	CGCTGGAAGTGGTAAAGCA
Lef1	CTGCGCCACCGATGAGATGAT	CCGTTGCTGGCTGGGATGAT
Nrarp	GAAGCTGTTGGTCAAGTTCG	GAGATAGAGCACGATGTCCT
Tcf7l1	GCCAAATACTATGAGCTTGCC	TCTTCTTCCCATAGTTGTCCC
Cdkn1c8	GGACCTTTCGTTCATGTAGC	ACATGGTACAGAGTGTTCTCA
Dcx	ACATCTGCTAAAAGCCCAGGC	TGTTGAGAGCTGACTGCTGGA
Cnpase	CTACGGGAAGGCCGCTG	GGTGTCACAAAGAGAGCAGAGATG
Sfrp1	CACTGCGCCTTTGTCCCC	TTGGGCAGCACCATCTTCTT
Axin210	CAAAGTGGAGAGGATCGACTGAG	GGCTCCTGGAGACTGAAGATCAA
p389	GATGTGTTCACACCCGCAAG	GATGGGTCACCAGGTACAC
Tle1	GCCTCACCCTTCAGGACTTC	TCTGGACCATTTCTGCGCTT
Gapdh	TGCACCACCAACTGCTTAGC	GGCATGGACTGTGGTCATGA
β-actin	GCTCCTCCTGAGCGCAAG	CATCTGCTGGAAGGTGGACA
